# Supplementary material for: Dynamic Intracellular Metabolic Cell Signaling Profiles During Ag-Dependent B-Cell Differentiation
Source: Front Immunol. 2021 Mar 30;12:637832. doi: 10.3389/fimmu.2021.637832 (PMC8043114; doi:10.3389/fimmu.2021.637832)
Supplement: Supplementary Table 5 — Functional enrichment analysis (FEA) of the proteins identified in the 5 B-cell subpopulations. The file contains 5 Tables with the annotated clusters (p-value<0.05): (I) Table “350 in common” shows the 56 annotated clusters identified for the proteins in common across the naïve (N), CB, CC, memory (M), and PC subsets. (II) Table “1547_N_CB_CC_M” includes the 129 annotated clusters identified for the proteins in common across N, CB, CC, and M subsets. (III) Table “419_CB_CC_M” displays the 63 annotated clusters for proteins in common in CB, CC, and M subsets. (IV) Table “77_CC_M” shows the two annotated clusters for proteins in common between CC and M subpopulations. (V) Table “25_PC” depicts the two annotated clusters identified for the 25 proteins exclusively detected in the PC subset. (VI) Lists of proteins identified within each B-cell subpopulation across the pathways represented in Supplementary Figure S8 . [file Table_5.xlsx]

## Sheet: 350p in common
Annotation Cluster 1	Ribosome													Ribosome
Category	Term	Count	%	PValue	Genes	List Total	Pop Hits	Pop Total	Fold Enrichment	Bonferroni	Benjamini	FDR		Cell-cell adhesion
UP_KEYWORDS	Ribonucleoprotein	66	18.8571	1.57683e-53	P36578, P61513, P52597, P62750, Q9NPE3, P27635, P62753, P08865, P31943, P62273, P32969, P31942, P62280, P49458, P62899, P62424, P62829, P47914, P63220, Q00839, P61978, P62263, P09651, O60506, Q02543, P49207, P22626, P39019, P62910, P62913, P62861, Q9UKM9, P62318, Q15365, P18124, P46776, P46777, P46778, P14866, P46779, P62304, P30050, P62249, Q9UNX3, P55769, P62241, P46782, P62701, P60866, Q9Y4Y9,…	350	296	20581	13.1114	4.79356e-51	2.39678e-51	2.11138e-50		RNA processing
GOTERM_BP_DIRECT	GO:0006614~SRP-dependent cotranslational protein targeting to membrane	46	13.1429	3.34306e-51	P36578, P18124, P61513, P46776, P46777, P62750, P46778, P46779, P27635, P62753, P08865, P62273, P30050, P32969, P62280, P62249, P49458, Q9UNX3, P62899, P62424, P62241, P62829, P47914, P63220, P62263, P46782, P62701, P60866, Q02543, P05387, P05386, P49207, P39019, P83731, P62081, P62910, P62913, P25398, P62987, P08708, P62861, P62888, P37108, P18077, P40429, P26373	345	94	16792	23.8184	5.42245e-48	5.42245e-48	5.60715e-48		Protein binding/folding
GOTERM_BP_DIRECT	GO:0019083~viral transcription	45	12.8571	2.64232e-45	P36578, P18124, P61513, P46776, P46777, P62750, P46778, P46779, P62753, P27635, P08865, P62273, P30050, P32969, P62280, P12270, P62249, Q9UNX3, P62899, P62424, P62241, P62829, P47914, P63220, P62263, P46782, P62701, P60866, Q02543, P05387, P05386, P49207, P39019, P83731, P62081, P62910, P62913, P25398, P62987, P08708, P62861, P62888, P18077, P40429, P26373	345	112	16792	19.5559	4.28585e-42	2.14292e-42	4.43183e-42		Nucleosome
GOTERM_BP_DIRECT	GO:0000184~nuclear-transcribed mRNA catabolic process, nonsense-mediated decay	45	12.8571	6.56751e-44	P36578, P18124, P61513, P46776, P46777, P62750, P46778, P46779, P30153, P62753, P27635, P08865, P62273, P30050, P32969, P62280, P62249, Q9UNX3, P62899, P62424, P62241, P62829, P47914, P63220, P62263, P46782, P62701, P60866, Q02543, P05387, P05386, P49207, P39019, P83731, P62081, P62910, P62913, P25398, P62987, P08708, P62861, P62888, P18077, P40429, P26373	345	119	16792	18.4056	1.06525e-40	3.55083e-41	1.10154e-40		Mitochondrion
GOTERM_BP_DIRECT	GO:0006413~translational initiation	45	12.8571	9.13331e-41	P36578, P18124, P61513, P46776, P46777, P62750, P46778, P46779, P62753, P27635, P08865, P62273, P30050, P32969, P62280, P62249, Q9UNX3, P62899, P62424, P62241, P62829, P47914, P63220, P62263, P46782, P62701, P60866, Q02543, P05387, P05386, P49207, P39019, P83731, P62081, P62910, P62913, P25398, P60842, P62987, P08708, P62861, P62888, P18077, P40429, P26373	345	137	16792	15.9873	1.48142e-37	3.70356e-38	1.53188e-37		Heat shock protein
UP_KEYWORDS	Ribosomal protein	44	12.5714	1.52629e-36	P36578, P18124, P61513, P46776, P46777, P62750, P46778, P46779, P62753, P27635, P08865, P62273, P30050, P32969, P62280, P62249, Q9UNX3, P62899, P62424, P62241, P62829, P47914, P63220, P62263, P46782, P62701, P60866, Q02543, P05387, P05386, P49207, P39019, P83731, P62081, P62910, P62913, P25398, P62987, P08708, P62861, P62888, P18077, P40429, P26373	350	185	20581	13.9855	4.63993e-34	9.27986e-35	2.04371e-33		Biosynthesis
GOTERM_MF_DIRECT	GO:0003735~structural constituent of ribosome	47	13.4286	3.30871e-33	P36578, P18124, P61513, P46776, P46777, P62750, P46778, P46779, P62753, P27635, P08865, P62273, P30050, P32969, P62280, P62249, P05141, Q9UNX3, P62899, P62424, P62241, P62829, P47914, Q02978, P63220, P62263, P46782, P62701, P60866, Q02543, P05387, P05386, P49207, P39019, P12236, P83731, P62081, P62910, P62913, P25398, P62987, P08708, P62861, P62888, P18077, P40429, P26373	345	222	16881	10.3591	1.78009e-30	8.90044e-31	4.81374e-30		Tubulin
GOTERM_BP_DIRECT	GO:0006412~translation	49	14	1.18109e-32	P36578, P18124, P61513, P46776, P46777, P62750, P46778, P46779, P62753, P27635, P08865, P62273, P32969, P30050, P62280, P62249, P05141, Q9UNX3, P62899, P55769, P62424, P62241, P62829, P47914, Q02978, P63220, P62263, P46782, P62701, P60866, Q02543, P05387, P05386, P49207, P39019, P12236, P83731, P62081, P62910, P62913, P25398, P62987, P08708, P62861, P62888, P18077, P40429, P26373, P23381	345	253	16792	9.42668	1.91574e-29	3.83147e-30	1.98099e-29		Actin
GOTERM_BP_DIRECT	GO:0006364~rRNA processing	45	12.8571	1.54082e-31	P36578, P18124, P61513, P46776, P46777, P62750, P46778, P46779, P62753, P27635, P08865, P62273, P30050, P32969, P62280, P62249, Q9UNX3, P62899, P55769, P62424, P62241, P62829, P47914, P63220, P62263, P46782, P62701, P60866, Q02543, P05387, P05386, P49207, P39019, P83731, P62081, P62910, P62913, P25398, P62987, P08708, P62861, P62888, P18077, P40429, P26373	345	214	16792	10.2349	2.49921e-28	4.16535e-29	2.58434e-28		ATP-binding
KEGG_PATHWAY	hsa03010:Ribosome	44	12.5714	4.16572e-31	P36578, P18124, P61513, P46776, P46777, P62750, P46778, P46779, P62753, P27635, P08865, P62273, P30050, P32969, P62280, P62249, Q9UNX3, P62899, P62424, P62241, P62829, P47914, P63220, P62263, P46782, P62701, P60866, Q02543, P05387, P05386, P49207, P39019, P83731, P62081, P62910, P62913, P25398, P62987, P08708, P62861, P62888, P18077, P40429, P26373	235	136	6910	9.51314	7.5816e-29	7.5816e-29	5.14058e-28		Translation elongation factor
GOTERM_CC_DIRECT	GO:0022625~cytosolic large ribosomal subunit	29	8.28571	1.20406e-30	P18124, P36578, P61513, P46776, P46777, P62750, P46778, P46779, P27635, P32969, P30050, P62899, Q9UNX3, P55769, P62424, P62829, P47914, Q02543, P05387, P05386, P49207, P62910, P83731, P62913, P62987, P62888, P18077, P26373, P40429	349	68	18224	22.2693	5.12929e-28	8.54882e-29	1.69481e-27		Thioredoxin
GOTERM_CC_DIRECT	GO:0005840~ribosome	39	11.1429	2.96663e-30	P36578, P18124, P61513, P46776, P46777, P62750, P46778, P46779, P62753, P27635, P62273, P32969, P62280, P62249, P62899, P62424, P62241, P62829, P47914, P63220, P62263, P62701, P60866, Q02543, P05387, P05386, P49207, P39019, P83731, P62910, P62081, P62913, P62987, P08708, P62861, P62888, P18077, P26373, P40429	349	166	18224	12.268	1.26379e-27	1.80541e-28	4.17578e-27		Histone
														SAP domain
Annotation Cluster 2	Cell-cell adhesion													TCA
Category	Term	Count	%	PValue	Genes	List Total	Pop Hits	Pop Total	Fold Enrichment	Bonferroni	Benjamini	FDR		Lactate metabolism
GOTERM_MF_DIRECT	GO:0098641~cadherin binding involved in cell-cell adhesion	48	13.7143	6.95459e-29	O00151, P62750, P04075, P06733, P29692, P37802, P31946, Q9H4M9, P30041, P07737, P40121, Q7KZF4, P11142, P15311, P62424, P42166, P47914, P11021, P62826, P61978, Q9Y265, Q99497, Q06830, Q9UJU6, P63104, Q9Y490, Q96C19, P49207, P46060, Q15019, P83731, P31939, Q92522, P18031, P35579, P26641, O00299, P22234, P50552, P08238, P13639, P62258, P68431, P14618, Q14847, Q15365, Q8NC51, Q16181	345	290	16881	8.09883	3.74157e-26	9.35392e-27	1.0118e-25		Mrna
GOTERM_CC_DIRECT	GO:0005913~cell-cell adherens junction	48	13.7143	6.17204e-28	O00151, P62750, P04075, P06733, P29692, P37802, P31946, Q9H4M9, P30041, P07737, P40121, Q7KZF4, P11142, P15311, P62424, P42166, P47914, P11021, P62826, P61978, Q9Y265, Q99497, Q06830, Q9UJU6, P63104, Q9Y490, Q96C19, P49207, P46060, Q15019, P83731, P31939, Q92522, P18031, P35579, P26641, O00299, P22234, P50552, P08238, P13639, P62258, P68431, P14618, Q14847, Q15365, Q8NC51, Q16181	349	323	18224	7.75992	2.62929e-25	2.92143e-26	8.68767e-25		Spliceosome
GOTERM_BP_DIRECT	GO:0098609~cell-cell adhesion	44	12.5714	5.3091e-26	O00151, P62750, P04075, P06733, P29692, P37802, P31946, Q9H4M9, P30041, P40121, P07737, Q7KZF4, P11142, P62424, P42166, P47914, P11021, P62826, P61978, Q9Y265, Q99497, Q06830, Q9UJU6, P63104, Q96C19, P49207, P46060, Q15019, P83731, P31939, Q92522, P18031, P26641, P22234, P50552, P08238, P13639, P62258, P68431, P14618, Q14847, Q15365, Q8NC51, Q16181	345	271	16792	7.90254	8.61135e-23	1.23019e-23	8.90468e-23		14-3-3 protein
														Repeat
Annotation Cluster 3	RNA processing													Pyruvate metabolism
Category	Term	Count	%	PValue	Genes	List Total	Pop Hits	Pop Total	Fold Enrichment	Bonferroni	Benjamini	FDR		Catabolic process
UP_KEYWORDS	RNA-binding	57	16.2857	1.51439e-23	Q12906, P52597, P62750, Q12904, Q9Y3Y2, P12268, P31943, P23246, Q9GZT3, P31942, Q15233, Q96PK6, P62280, P49458, O00148, P61978, Q00839, P09651, Q99497, O60506, Q9NR56, P18583, P22626, P62913, P17844, P06748, P60842, P26599, Q9UKM9, P62318, Q13148, P19338, Q15365, P63241, P82979, Q8NC51, P18124, P33240, P46777, P14866, Q92841, P30050, P62304, P55769, Q86V81, Q92945, P98179, P62701, Q9Y4Y9, P52272,…	350	665	20581	5.04024	4.60375e-21	5.75469e-22	2.02777e-20		DNA replication
GOTERM_BP_DIRECT	GO:0000398~mRNA splicing, via spliceosome	33	9.42857	2.61266e-18	P52597, Q12874, P33240, O75937, P14866, Q9UMS4, P31943, P62304, P31942, Q15233, P11142, P55769, Q86V81, O00148, Q00839, P61978, P09651, O60506, Q9Y4Y9, P52272, P22626, P51991, P17844, Q7RTV0, Q13435, P07910, P26599, Q9BXP5, Q08170, Q9UKM9, P62318, Q14103, Q15365	345	222	16792	7.2351	4.23774e-15	5.29717e-16	4.38208e-15		DNA helicase
UP_KEYWORDS	mRNA splicing	32	9.14286	1.27073e-17	P52597, Q12874, Q9UMS4, Q07021, P23246, P31943, P62304, Q15233, P11142, P55769, Q86V81, O00148, Q92945, Q00839, P61978, P09651, O60506, Q9NR56, P18583, Q9Y4Y9, P52272, P22626, P51991, P17844, Q7RTV0, Q13435, P07910, P26599, Q08170, Q9UKM9, P62318, Q13148	350	260	20581	7.23727	3.86303e-15	3.86303e-16	1.70151e-14		ATPase
UP_KEYWORDS	mRNA processing	35	10	3.65568e-17	P52597, Q12874, P33240, Q9UMS4, Q07021, P23246, P31943, P62304, P31942, Q15233, P11142, P55769, Q86V81, O00148, Q92945, Q00839, P61978, P09651, O60506, Q9NR56, P18583, Q9Y4Y9, P52272, P22626, P51991, P55265, P17844, Q7RTV0, Q13435, P07910, P26599, Q08170, Q9UKM9, P62318, Q13148	350	332	20581	6.1991	1.11133e-14	1.0103e-15	4.89496e-14		Arp2/3 complex
UP_KEYWORDS	Spliceosome	22	6.28571	3.67073e-15	P52597, Q9Y4Y9, Q12874, P52272, P22626, P51991, Q9UMS4, P17844, P31943, P62304, Q7RTV0, Q13435, P11142, P07910, P55769, Q9UKM9, Q86V81, P62318, Q00839, P61978, P09651, O60506	350	127	20581	10.1863	1.11378e-12	8.57092e-14	4.90719e-12		Antigen processing and presentation
GOTERM_CC_DIRECT	GO:0071013~catalytic step 2 spliceosome	19	5.42857	1.19852e-13	P52597, Q12874, P52272, P51991, P22626, Q9UMS4, P17844, P31943, P62304, Q7RTV0, Q13435, P07910, Q9UKM9, Q86V81, P62318, Q00839, P61978, P09651, O60506	349	92	18224	10.7841	5.10791e-11	3.00471e-12	1.68776e-10		Actin binding
GOTERM_BP_DIRECT	GO:0010467~gene expression	13	3.71429	1.62205e-10	P07910, P52597, P26599, P52272, P22626, P51991, P14866, Q14103, P31943, P61978, Q00839, P09651, Q15365	345	48	16792	13.1821	2.63097e-07	2.9233e-08	2.72058e-07		Thiolase
PFAM	PF00076:RNA recognition motif. (a.k.a. RRM, RBD, or RNP domain)	23	6.57143	1.70831e-10	P52597, P52272, P33240, P22626, P51991, P14866, P23246, P31943, Q9GZT3, P31942, Q15233, Q96PK6, P07910, P26599, Q08170, Q9UKM9, Q86V81, P98179, Q13148, Q14103, P09651, P19338, O60506	342	211	17475	5.56976	6.0816e-08	6.0816e-08	2.34233e-07		DNA repair
INTERPRO	IPR012677:Nucleotide-binding, alpha-beta plait	25	7.14286	2.09547e-10	P52597, P52272, P62750, P33240, P22626, P51991, P14866, P23246, P31943, Q9GZT3, P31942, Q15233, Q96PK6, P07910, P26599, Q9BXP5, Q08170, Q9UKM9, Q86V81, P98179, Q13148, Q14103, P09651, P19338, O60506	350	264	18559	5.02137	1.64704e-07	1.64704e-07	3.20909e-07		KH domain
INTERPRO	IPR000504:RNA recognition motif domain	23	6.57143	3.29074e-10	P52597, P52272, P33240, P22626, P51991, P14866, P23246, P31943, Q9GZT3, P31942, Q15233, Q96PK6, P07910, P26599, Q08170, Q9UKM9, Q86V81, P98179, Q13148, Q14103, P09651, P19338, O60506	350	226	18559	5.39642	2.58652e-07	1.29326e-07	5.03958e-07		Actin
UP_SEQ_FEATURE	domain:RRM 2	17	4.85714	5.13739e-10	Q99829, P52597, P52272, P51991, P22626, P14866, P23246, P31943, P31942, Q15233, P26599, Q08170, Q13148, Q14103, P09651, P19338, O60506	348	125	20063	7.84071	5.00896e-07	2.50448e-07	8.09074e-07		HSP
UP_SEQ_FEATURE	domain:RRM 1	17	4.85714	5.13739e-10	Q99829, P52597, P52272, P51991, P22626, P14866, P23246, P31943, P31942, Q15233, P26599, Q08170, Q13148, Q14103, P09651, P19338, O60506	348	125	20063	7.84071	5.00896e-07	2.50448e-07	8.09074e-07		Mitochondrion
UP_KEYWORDS	Viral nucleoprotein	10	2.85714	5.43964e-10	P52597, P07910, P52272, P51991, P14866, Q14103, P61978, P09651, P31942, O60506	350	28	20581	21.001	1.65365e-07	1.03353e-08	7.28368e-07		Mitochondrial synthesis
GOTERM_MF_DIRECT	GO:0000166~nucleotide binding	29	8.28571	6.56314e-10	P52597, P33240, P62750, P14866, P12268, P23246, P31943, Q9GZT3, P31942, Q15233, Q96PK6, P07900, Q86V81, Q9BX68, P98179, P49773, P09651, O60506, P52272, P51991, P22626, P07910, P26599, Q9BXP5, Q08170, Q9UKM9, Q13148, Q14103, P19338	345	348	16881	4.07754	3.53097e-07	5.04424e-08	9.54849e-07		Histone
GOTERM_CC_DIRECT	GO:0019013~viral nucleocapsid	10	2.85714	1.5277e-09	P52597, P07910, P52272, P51991, P14866, Q14103, P61978, P09651, P31942, O60506	349	28	18224	18.6492	6.50799e-07	3.254e-08	2.15036e-06		DNA
KEGG_PATHWAY	hsa03040:Spliceosome	21	6	1.59551e-08	P34931, Q9Y4Y9, Q12874, P52272, P51991, Q9UMS4, P54652, P17844, P62304, Q7RTV0, Q13435, P11142, P07910, P55769, Q08170, Q86V81, P62318, Q00839, P61978, P09651, Q15365	235	133	6910	4.64278	2.90382e-06	1.45191e-06	1.96889e-05		Signaling pathways
UP_KEYWORDS	Virion	10	2.85714	8.07991e-08	P52597, P07910, P52272, P51991, P14866, Q14103, P61978, P09651, P31942, O60506	350	47	20581	12.5112	2.45626e-05	1.06795e-06	0.00010819		Chaperone
GOTERM_BP_DIRECT	GO:0008380~RNA splicing	16	4.57143	1.68932e-06	Q9NR56, P18583, Q12874, Q07021, P30153, P23246, P31942, Q15233, Q13435, P07910, P26599, Q08170, P62318, Q92945, Q13148, O60506	345	166	16792	4.69132	0.00273633	0.000152215	0.00283338		Immunoglobulin
GOTERM_CC_DIRECT	GO:0005681~spliceosomal complex	12	3.42857	1.76499e-06	Q13435, P11142, P07910, Q9Y4Y9, Q12874, P52272, P22626, P62318, O00148, P09651, P31942, P62304	349	94	18224	6.6661	0.000751605	2.89183e-05	0.00248435		Lamin
GOTERM_BP_DIRECT	GO:0006397~mRNA processing	16	4.57143	4.3227e-06	Q9NR56, P18583, Q9Y4Y9, Q12874, P22626, P14866, Q07021, P55265, P23246, Q15233, Q13435, P26599, Q08170, Q92945, Q13148, P09651	345	179	16792	4.35061	0.00698691	0.000368955	0.00725		Negative regulation of translation
GOTERM_BP_DIRECT	GO:0006396~RNA processing	12	3.42857	4.69702e-06	P52597, P14866, P62318, P55265, Q14103, P98179, P31943, P61978, Q00839, Q92841, P31942, O60506	345	97	16792	6.02134	0.00758963	0.000380856	0.00787778		Septin
UP_SEQ_FEATURE	domain:RRM 3	8	2.28571	8.52616e-05	Q99829, P52597, P26599, P52272, P14866, P31943, P19338, O60506	348	61	20063	7.56096	0.0797718	0.0103379	0.134192		Glucose metabolism
UP_SEQ_FEATURE	compositionally biased region:Gly-rich	12	3.42857	0.00461451	Q99829, Q96AE4, P51991, P22626, P14866, Q92945, Q14103, P98179, Q13148, Q00839, P09651, P31942	348	252	20063	2.74535	0.988997	0.178043	7.02512		DNA recombination
														Globin
Annotation Cluster 4	Protein binding/folding													GST
Category	Term	Count	%	PValue	Genes	List Total	Pop Hits	Pop Total	Fold Enrichment	Bonferroni	Benjamini	FDR		Helicase
UP_KEYWORDS	Chaperone	22	6.28571	3.48609e-11	O75347, O75937, P17987, P27797, Q14019, P54652, Q16576, P06748, P38646, Q99832, P61604, Q15084, P07900, P11142, P14625, P08238, Q58FF7, P10809, Q86V81, P07237, Q9Y4L1, Q99497	350	201	20581	6.43613	1.05977e-08	7.06514e-10	4.66788e-08		Purine biosynthesis
GOTERM_MF_DIRECT	GO:0051082~unfolded protein binding	18	5.14286	8.41366e-11	P34931, P17987, P27797, P54652, Q9Y230, P38646, Q99832, P06748, P68371, P62937, P61604, P11142, P07900, P14625, P08238, Q58FF7, P10809, P11021	345	110	16881	8.0068	4.52655e-08	7.54425e-09	1.22408e-07		Antibacterial humoral response
GOTERM_BP_DIRECT	GO:0006457~protein folding	21	6	8.74061e-10	O75347, O43396, P30101, P17987, Q8NBS9, P27797, Q9Y230, P38646, Q99832, P13667, Q9Y536, P62937, P61604, Q15084, P07900, P11142, P14314, P62873, P14625, P08238, Q58FF7	345	180	16792	5.67845	1.41773e-06	1.41773e-07	1.46602e-06		Centromere
UP_KEYWORDS	Stress response	13	3.71429	1.29104e-07	P61604, P34932, P07900, P11142, P34931, Q58FF7, P08238, P14625, P10809, P54652, P98179, Q9Y4L1, Q99497	350	100	20581	7.64437	3.92468e-05	1.5699e-06	0.00017287		Proteolysis
														Cytoskeleton
Annotation Cluster 5	Nucleosome													Electron carrier activity
Category	Term	Count	%	PValue	Genes	List Total	Pop Hits	Pop Total	Fold Enrichment	Bonferroni	Benjamini	FDR		LIM binding
GOTERM_CC_DIRECT	GO:0000786~nucleosome	19	5.42857	1.77483e-13	Q16695, P04908, Q71UI9, O75367, Q02539, Q96A08, P33778, Q71DI3, Q92522, P20671, P84243, P16403, P68431, P16401, Q5SSJ5, P62807, Q96QV6, Q9P0M6, P62805	349	94	18224	10.5547	7.56255e-11	4.20142e-12	2.49878e-10
UP_KEYWORDS	Chromosome	32	9.14286	2.08921e-12	Q16695, P04908, Q71UI9, Q02539, P12956, Q96A08, O75531, P30153, Q71DI3, Q14141, P84243, P12270, P42166, Q9UQE7, P62807, Q14980, Q96QV6, Q9P0M6, P62805, O75367, P33778, P46060, Q15019, Q92522, P20671, P16403, Q08945, Q14683, P68431, P16401, Q5SSJ5, Q16181	350	400	20581	4.70423	6.35122e-10	4.53658e-11	2.79746e-09
GOTERM_BP_DIRECT	GO:0006334~nucleosome assembly	17	4.85714	2.70506e-09	Q16695, O75367, Q02539, Q96A08, P33778, Q71DI3, Q92522, P06748, P84243, P49321, P16403, P68431, P16401, Q5SSJ5, P62807, Q9P0M6, P62805	345	119	16792	6.95321	4.3876e-06	3.98873e-07	4.53706e-06
UP_KEYWORDS	Nucleosome core	14	4	3.38267e-09	P84243, Q16695, P04908, O75367, Q71UI9, Q96A08, P33778, P68431, Q71DI3, P62807, P20671, Q9P0M6, Q96QV6, P62805	350	89	20581	9.24989	1.02833e-06	5.41227e-08	4.5294e-06
INTERPRO	IPR007125:Histone core	13	3.71429	4.58423e-09	P84243, Q16695, P04908, O75367, Q71UI9, Q96A08, P33778, P68431, Q71DI3, P62807, P20671, Q9P0M6, Q96QV6	350	68	18559	10.1373	3.6032e-06	1.20107e-06	7.02049e-06
PFAM	PF00125:Core histone H2A/H2B/H3/H4	13	3.71429	6.86952e-09	P84243, Q16695, P04908, O75367, Q71UI9, Q96A08, P33778, P68431, Q71DI3, P62807, P20671, Q9P0M6, Q96QV6	342	68	17475	9.76845	2.44555e-06	1.22277e-06	9.41904e-06
INTERPRO	IPR009072:Histone-fold	14	4	1.87244e-07	P84243, Q16695, P04908, O75367, Q71UI9, Q96A08, P33778, P68431, Q71DI3, P62807, P20671, Q9P0M6, Q96QV6, P62805	350	112	18559	6.62821	0.000147163	2.45287e-05	0.000286753
GOTERM_CC_DIRECT	GO:0000784~nuclear chromosome, telomeric region	15	4.28571	1.95741e-07	O75367, P12956, P33778, Q96A08, P09874, P39748, P84243, P33991, P68431, Q86V81, P12004, Q96QV6, Q9P0M6, P62805, Q14566	349	130	18224	6.02513	8.33821e-05	3.79025e-06	0.000275521
INTERPRO	IPR002119:Histone H2A	6	1.71429	0.000108583	P04908, O75367, Q71UI9, P20671, Q9P0M6, Q96QV6	350	26	18559	12.2367	0.0818103	0.00500808	0.16616
KEGG_PATHWAY	hsa05322:Systemic lupus erythematosus	15	4.28571	0.000162409	Q16695, P04908, Q71UI9, O75367, Q96A08, P33778, Q71DI3, P20671, P84243, P68431, P62318, P62807, Q96QV6, Q9P0M6, P62805	235	134	6910	3.29152	0.0291281	0.00368828	0.200231
KEGG_PATHWAY	hsa05034:Alcoholism	16	4.57143	0.000927364	Q16695, P04908, O75367, Q71UI9, Q96A08, P33778, Q71DI3, P20671, P84243, P62873, P62993, P68431, P62807, Q96QV6, Q9P0M6, P62805	235	177	6910	2.65801	0.155372	0.0152336	1.13839
GOTERM_CC_DIRECT	GO:0000790~nuclear chromatin	12	3.42857	0.00124058	P49321, P04908, O75367, Q71UI9, P07910, Q02539, P16401, Q14839, P61978, P20671, Q9P0M6, Q96QV6	349	193	18224	3.2467	0.410697	0.0125119	1.73213
GOTERM_MF_DIRECT	GO:0046982~protein heterodimerization activity	21	6	0.001436	Q16695, P04908, Q71UI9, O75367, Q96A08, P33778, P30153, Q71DI3, P06748, P20671, P84243, P62258, P68431, Q14683, P07237, Q9UQE7, P62807, P55327, Q96QV6, Q9P0M6, P62805	345	465	16881	2.20976	0.538431	0.0304517	2.06899
GOTERM_CC_DIRECT	GO:0000788~nuclear nucleosome	6	1.71429	0.00145404	P84243, Q16695, Q96A08, P33778, P68431, P62807	349	44	18224	7.1206	0.461987	0.0139892	2.02734
GOTERM_BP_DIRECT	GO:0006342~chromatin silencing	6	1.71429	0.00218621	P04908, O75367, Q71UI9, P20671, Q9P0M6, Q96QV6	345	45	16792	6.48966	0.971273	0.069885	3.60427
UP_KEYWORDS	DNA-binding	50	14.2857	0.00876076	Q12906, P23193, P04908, Q71UI9, Q96A08, P06733, P12268, P29692, P23246, Q15233, Q96AE4, P42166, P61978, Q00839, Q14566, P18583, O75367, P33778, Q92522, Q04837, Q08945, P16403, P16401, Q13148, P19338, Q15365, P82979, Q16695, Q02539, P12956, O75531, Q71DI3, P09874, P84243, P53999, Q92945, P62807, P12004, Q96QV6, Q9P0M6, P62805, Q14839, P55265, P20671, Q7RTV0, P33991, O60869, P68431, Q14103, Q5SSJ5	350	2050	20581	1.43422	0.931094	0.0501417	11.1147
Annotation Cluster 6	Mitochondrion
Category	Term	Count	%	PValue	Genes	List Total	Pop Hits	Pop Total	Fold Enrichment	Bonferroni	Benjamini	FDR
UP_SEQ_FEATURE	transit peptide:Mitochondrion	26	7.42857	1.19424e-06	P24752, P33316, P40926, P49411, P00390, Q07021, P34897, P20674, O00217, Q9GZT3, P38646, P0C7P4, P06576, P11177, Q04837, P31930, P11310, P10809, P55809, P13804, P25705, Q16822, Q99798, Q9BX68, P08559, P22695	348	482	20063	3.10988	0.00116371	0.00023285	0.00188076
UP_KEYWORDS	Mitochondrion	43	12.2857	1.21138e-06	P24752, P33316, Q99536, Q07021, O43678, Q9GZT3, P21796, P05141, P61604, P35232, P54819, P11310, P22307, P13804, Q16822, Q02978, Q9BX68, P08559, P22695, Q99497, P40926, P49411, P00390, P42765, P22314, P12236, P34897, P20674, P56385, O00217, P39748, P38646, Q04837, P11177, P06576, P31930, P09211, P10809, P14317, P55809, P25705, O75947, Q99798	350	1119	20581	2.25963	0.000368191	1.26985e-05	0.00162202
UP_KEYWORDS	Transit peptide	26	7.42857	5.53082e-06	P24752, P33316, P40926, P49411, P00390, P42765, Q07021, P34897, P20674, O00217, Q9GZT3, P38646, P06576, P11177, Q04837, P31930, P11310, P10809, P55809, P13804, P25705, Q16822, Q99798, Q9BX68, P08559, P22695	350	536	20581	2.85238	0.00167996	5.60442e-05	0.00740552
GOTERM_CC_DIRECT	GO:0005759~mitochondrial matrix	20	5.71429	1.83604e-05	P24752, P34931, P40926, P00390, Q07021, P34897, O00217, P61604, P11177, P06576, Q04837, P11310, P10809, P55809, P13804, P25705, Q16822, Q99798, P08559, Q99497	349	327	18224	3.19375	0.0077911	0.000279304	0.0258407
Annotation Cluster 7	Heat shock protein
Category	Term	Count	%	PValue	Genes	List Total	Pop Hits	Pop Total	Fold Enrichment	Bonferroni	Benjamini	FDR
INTERPRO	IPR018181:Heat shock protein 70, conserved site	7	2	1.83761e-07	P34932, P11142, P34931, P54652, P11021, Q9Y4L1, P38646	350	15	18559	24.7453	0.000144426	2.88869e-05	0.00028142
INTERPRO	IPR013126:Heat shock protein 70 family	7	2	1.83761e-07	P34932, P11142, P34931, P54652, P11021, Q9Y4L1, P38646	350	15	18559	24.7453	0.000144426	2.88869e-05	0.00028142
PFAM	PF00012:Hsp70 protein	7	2	2.27976e-07	P34932, P11142, P34931, P54652, P11021, Q9Y4L1, P38646	342	15	17475	23.845	8.11563e-05	2.70528e-05	0.000312586
GOTERM_BP_DIRECT	GO:0006986~response to unfolded protein	8	2.28571	2.07385e-05	P61604, P07900, P34932, P11142, P34931, P08238, P10809, P54652	345	42	16792	9.27095	0.0330787	0.00146146	0.0347779
Annotation Cluster 8	Biosynthesis
Category	Term	Count	%	PValue	Genes	List Total	Pop Hits	Pop Total	Fold Enrichment	Bonferroni	Benjamini	FDR
KEGG_PATHWAY	hsa01130:Biosynthesis of antibiotics	25	7.14286	1.60627e-07	P24752, P40925, P60174, P04406, P40926, P18669, P42765, P06733, P04075, P34897, P31939, P07195, O43175, P29401, Q6ZMR3, P11177, P11310, P54819, P22234, O95336, P00558, Q16822, P14618, Q99798, P08559	235	212	6910	3.46748	2.92336e-05	9.74464e-06	0.000198217
KEGG_PATHWAY	hsa01200:Carbon metabolism	18	5.14286	1.97844e-07	P24752, P40925, P60174, P04406, P40926, P18669, P06733, P04075, P34897, O43175, P29401, P11177, P11310, O95336, P00558, P14618, Q99798, P08559	235	113	6910	4.68386	3.60069e-05	9.00184e-06	0.000244143
GOTERM_BP_DIRECT	GO:0006094~gluconeogenesis	10	2.85714	2.15729e-07	P40925, P60174, P04406, P40926, P18669, P00558, P04075, P06733, Q16822, Q02978	345	44	16792	11.0619	0.000349851	2.49934e-05	0.00036183
GOTERM_BP_DIRECT	GO:0061621~canonical glycolysis	7	2	1.15211e-05	P60174, P04406, P18669, P00558, P04075, P06733, P14618	345	26	16792	13.1041	0.0185137	0.00084906	0.0193219
UP_KEYWORDS	Glycolysis	7	2	1.17217e-05	P60174, P04406, P18669, P00558, P04075, P06733, P14618	350	31	20581	13.2781	0.00355707	0.000114942	0.0156942
KEGG_PATHWAY	hsa00010:Glycolysis / Gluconeogenesis	12	3.42857	1.27754e-05	Q6ZMR3, P60174, P04406, P11177, P18669, P00558, P04075, P06733, Q16822, P14618, P07195, P08559	235	67	6910	5.26643	0.00232243	0.000387447	0.015764
KEGG_PATHWAY	hsa01230:Biosynthesis of amino acids	11	3.14286	0.000175071	P60174, P04406, P18669, P00558, P04075, P06733, P34897, P14618, Q99798, O43175, P29401	235	74	6910	4.3709	0.0313634	0.00353438	0.215827
UP_SEQ_FEATURE	binding site:Substrate	16	4.57143	0.000257295	P33316, P40925, P60174, P40926, P04075, P06733, P14174, P07195, P23526, Q6ZMR3, Q9NRX4, P11310, P00558, P09960, Q16822, P14618	348	301	20063	3.06457	0.221896	0.0247773	0.404438
GOTERM_BP_DIRECT	GO:0006096~glycolytic process	6	1.71429	0.000598307	P60174, P04406, P18669, P00558, P04075, P06733	345	34	16792	8.58926	0.621199	0.0258952	0.998789
Annotation Cluster 9	Tubulin
Category	Term	Count	%	PValue	Genes	List Total	Pop Hits	Pop Total	Fold Enrichment	Bonferroni	Benjamini	FDR
GOTERM_MF_DIRECT	GO:0005200~structural constituent of cytoskeleton	16	4.57143	6.53559e-09	Q13509, P04350, P07437, Q9Y490, O15144, Q71U36, P26038, P68363, Q16352, P68371, Q14651, P61160, P08670, P59998, Q13885, P61158	345	110	16881	7.11715	3.51614e-06	4.39519e-07	9.50842e-06
KEGG_PATHWAY	hsa05130:Pathogenic Escherichia coli infection	12	3.42857	7.64254e-07	P07437, Q13509, P04350, P15311, O15144, Q71U36, P14317, P68363, Q13885, P59998, P19338, P68371	235	51	6910	6.91865	0.000139085	2.78185e-05	0.000943101
INTERPRO	IPR018316:Tubulin/FtsZ, 2-layer sandwich domain	7	2	2.45063e-06	P07437, Q13509, P04350, Q71U36, P68363, Q13885, P68371	350	22	18559	16.8718	0.00192434	0.000213999	0.00375293
PFAM	PF03953:Tubulin C-terminal domain	7	2	3.02761e-06	P07437, Q13509, P04350, Q71U36, P68363, Q13885, P68371	342	22	17475	16.258	0.00107725	0.000269422	0.00415119
INTERPRO	IPR008280:Tubulin/FtsZ, C-terminal	7	2	3.26327e-06	P07437, Q13509, P04350, Q71U36, P68363, Q13885, P68371	350	23	18559	16.1383	0.00256165	0.00025646	0.00499739
INTERPRO	IPR017975:Tubulin, conserved site	7	2	3.26327e-06	P07437, Q13509, P04350, Q71U36, P68363, Q13885, P68371	350	23	18559	16.1383	0.00256165	0.00025646	0.00499739
INTERPRO	IPR023123:Tubulin, C-terminal	7	2	3.26327e-06	P07437, Q13509, P04350, Q71U36, P68363, Q13885, P68371	350	23	18559	16.1383	0.00256165	0.00025646	0.00499739
INTERPRO	IPR000217:Tubulin	7	2	4.28242e-06	P07437, Q13509, P04350, Q71U36, P68363, Q13885, P68371	350	24	18559	15.4658	0.00336033	0.00028046	0.00655809
PFAM	PF00091:Tubulin/FtsZ family, GTPase domain	7	2	5.2844e-06	P07437, Q13509, P04350, Q71U36, P68363, Q13885, P68371	342	24	17475	14.9031	0.00187948	0.000313493	0.00724538
INTERPRO	IPR003008:Tubulin/FtsZ, GTPase domain	7	2	5.54595e-06	P07437, Q13509, P04350, Q71U36, P68363, Q13885, P68371	350	25	18559	14.8472	0.00434964	0.000335262	0.00849297
INTERPRO	IPR013838:Beta tubulin, autoregulation binding site	5	1.42857	1.43747e-05	P07437, Q13509, P04350, Q13885, P68371	350	9	18559	29.4587	0.011235	0.000752956	0.0220118
INTERPRO	IPR002453:Beta tubulin	5	1.42857	1.43747e-05	P07437, Q13509, P04350, Q13885, P68371	350	9	18559	29.4587	0.011235	0.000752956	0.0220118
GOTERM_BP_DIRECT	GO:0007017~microtubule-based process	7	2	8.20122e-05	P07437, Q13509, P04350, Q71U36, P68363, Q13885, P68371	345	36	16792	9.46409	0.12456	0.00491489	0.137466
UP_SEQ_FEATURE	nucleotide phosphate-binding region:GTP	15	4.28571	0.00106945	P68104, Q13509, P04350, P07437, Q71U36, P49411, Q15019, P68363, P68371, Q14141, P13639, Q16822, Q13885, P62826, Q16181	348	310	20063	2.78963	0.6477	0.0671879	1.67103
UP_KEYWORDS	GTP-binding	15	4.28571	0.00229476	P68104, Q13509, P04350, P07437, Q71U36, P49411, Q15019, P68363, P68371, Q14141, P13639, Q16822, Q13885, P62826, Q16181	350	343	20581	2.57155	0.502624	0.0147499	3.02939
GOTERM_MF_DIRECT	GO:0005525~GTP binding	18	5.14286	0.00237933	P68104, Q13509, P04350, P07437, Q71U36, P49411, Q15019, P68363, P68371, Q9H4M9, Q14141, P07900, P13639, P08238, Q16822, P62826, Q13885, Q16181	345	384	16881	2.29361	0.722409	0.04474	3.40637
GOTERM_MF_DIRECT	GO:0003924~GTPase activity	13	3.71429	0.00317397	P68104, Q13509, P04350, P07437, P62873, Q71U36, P13639, P49411, P52566, P68363, P62826, Q13885, P68371	345	234	16881	2.71836	0.81919	0.0554157	4.51972
KEGG_PATHWAY	hsa04540:Gap junction	8	2.28571	0.0290606	P07437, Q13509, P04350, P62993, Q71U36, P68363, Q13885, P68371	235	88	6910	2.67311	0.995334	0.235375	30.5058
KEGG_PATHWAY	hsa04145:Phagosome	11	3.14286	0.0344705	P07437, Q13509, P04350, P31146, O75396, Q71U36, P38606, P27797, P68363, Q13885, P68371	235	153	6910	2.11403	0.998312	0.251883	35.136
GOTERM_CC_DIRECT	GO:0005874~microtubule	12	3.42857	0.0370201	O75347, P07437, Q13509, P04350, Q71U36, P16949, P17987, P68363, Q13885, Q99832, P68371, Q16555	349	311	18224	2.01483	1	0.205124	41.1971
GOTERM_BP_DIRECT	GO:0007010~cytoskeleton organization	8	2.28571	0.0481603	Q13509, P04350, Q71U36, P26038, Q13885, P23528, P68371, Q16555	345	161	16792	2.41851	1	0.507614	56.302
Annotation Cluster 10	Actin
Category	Term	Count	%	PValue	Genes	List Total	Pop Hits	Pop Total	Fold Enrichment	Bonferroni	Benjamini	FDR
GOTERM_MF_DIRECT	GO:0051015~actin filament binding	16	4.57143	7.98681e-08	P31146, Q9Y490, O15144, P23528, P35579, Q14651, P61160, P15311, P13639, P06753, O75083, P59998, Q14847, P61158, P13796, Q9UJU6	345	132	16881	5.93096	4.29681e-05	4.77433e-06	0.000116198
GOTERM_CC_DIRECT	GO:0015629~actin cytoskeleton	13	3.71429	0.00101568	P31146, P15311, P61160, P50552, P33241, O15144, P04075, Q15019, P23528, P61158, P13796, P35579, Q16181	349	218	18224	3.1139	0.351374	0.0107641	1.4202
Annotation Cluster 11	ATP-binding
Category	Term	Count	%	PValue	Genes	List Total	Pop Hits	Pop Total	Fold Enrichment	Bonferroni	Benjamini	FDR
UP_KEYWORDS	Nucleotide-binding	63	18	4.42129e-08	P07437, P04350, Q71U36, Q9Y230, Q9H4M9, P68371, Q14141, P11142, P54819, P38606, O00148, Q16822, P62826, Q00839, Q9Y265, Q9UQE7, P25098, Q14566, P68104, P49411, P17987, P22314, Q15019, P68363, P17844, P38646, Q562R1, P35579, P60842, P08238, P00558, P10809, Q14683, P61158, Q16181, P34932, P34931, P12956, P30085, P16615, Q99832, Q92841, P07900, P61160, P14625, Q58FF7, P11021, Q9BX68, P55072, P49773,…	350	1788	20581	2.07191	1.34406e-05	6.10942e-07	5.92011e-05
UP_KEYWORDS	ATP-binding	46	13.1429	2.26939e-05	P34932, P34931, P12956, Q9Y230, P30085, P16615, Q99832, Q9H4M9, Q92841, P07900, P11142, P61160, P54819, Q58FF7, P14625, P38606, O00148, P11021, Q00839, Q9Y265, Q9UQE7, P55072, P25098, Q14566, P17987, P42765, P22314, Q14839, P54652, P17844, P38646, Q562R1, P35579, P60842, P33991, P06576, P22234, P08238, P10809, P00558, Q14683, P25705, P14618, P61158, Q9Y4L1, P23381	350	1391	20581	1.94459	0.00687529	0.000215572	0.0303829
GOTERM_MF_DIRECT	GO:0005524~ATP binding	47	13.4286	0.00316549	P34932, P34931, P12956, Q9Y230, P30085, P16615, Q99832, Q9H4M9, Q92841, P61604, P07900, P11142, P61160, P54819, Q58FF7, P14625, P38606, O00148, P11021, Q00839, Q9Y265, Q9UQE7, P55072, P25098, Q14566, P17987, P42765, P22314, Q14839, P54652, P17844, P38646, Q562R1, P35579, P60842, P33991, P06576, P22234, P08238, P10809, P00558, Q14683, P25705, P14618, P61158, Q9Y4L1, P23381	345	1495	16881	1.53828	0.818361	0.0571221	4.50791
INTERPRO	IPR027417:P-loop containing nucleoside triphosphate hydrolase	29	8.28571	0.00471099	Q9Y230, P30085, Q9H4M9, Q92841, Q14141, P54819, P38606, O00148, P62826, Q9Y265, Q9UQE7, Q00839, P55072, Q14566, P68104, P49411, P42765, Q14839, Q15019, P17844, P35579, P60842, P06576, P33991, P13639, Q1KMD3, Q14683, P25705, Q16181	350	879	18559	1.74943	0.975561	0.128436	6.97636
Annotation Cluster 12	Translation elongation factor
Category	Term	Count	%	PValue	Genes	List Total	Pop Hits	Pop Total	Fold Enrichment	Bonferroni	Benjamini	FDR
GOTERM_BP_DIRECT	GO:0006414~translational elongation	8	2.28571	3.73455e-08	P68104, P26641, P05387, P13639, P49411, P05386, P29692, P24534	345	18	16792	21.6322	6.05725e-05	5.04785e-06	6.26376e-05
UP_KEYWORDS	Elongation factor	8	2.28571	5.52533e-07	P68104, P26641, P23193, P13639, P49411, P29692, P24534, P63241	350	30	20581	15.6808	0.000167956	5.99891e-06	0.000739839
GOTERM_MF_DIRECT	GO:0003746~translation elongation factor activity	8	2.28571	4.59889e-06	P68104, P26641, P23193, P13639, P49411, P29692, P24534, P63241	345	34	16881	11.513	0.00247115	0.00024739	0.00669057
UP_KEYWORDS	Protein biosynthesis	11	3.14286	0.000276	P68104, P26641, P23193, P13639, P49411, Q12904, P29692, P24534, P63241, P23381, P60842	350	152	20581	4.25547	0.0804911	0.00232827	0.368933
GOTERM_CC_DIRECT	GO:0005853~eukaryotic translation elongation factor 1 complex	3	0.857143	0.00212686	P68104, P29692, P24534	349	4	18224	39.1633	0.59627	0.019954	2.95246
INTERPRO	IPR009000:Translation elongation/initiation factor/Ribosomal, beta-barrel	4	1.14286	0.018388	P68104, P13639, P49411, P18077	350	30	18559	7.0701	1	0.357279	24.7401
INTERPRO	IPR004161:Translation elongation factor EFTu/EF1A, domain 2	3	0.857143	0.0315028	P68104, P13639, P49411	350	15	18559	10.6051	1	0.458628	38.7502
PFAM	PF03144:Elongation factor Tu domain 2	3	0.857143	0.0337153	P68104, P13639, P49411	342	15	17475	10.2193	0.999995	0.456912	37.5157
Annotation Cluster 13	Thioredoxin
Category	Term	Count	%	PValue	Genes	List Total	Pop Hits	Pop Total	Fold Enrichment	Bonferroni	Benjamini	FDR
UP_KEYWORDS	Redox-active center	11	3.14286	7.89836e-09	P30041, P13667, O43396, P30101, Q15084, P35754, P00390, Q8NBS9, P07237, P32119, Q06830	350	49	20581	13.2006	2.4011e-06	1.20055e-07	1.05759e-05
UP_SEQ_FEATURE	short sequence motif:Prevents secretion from ER	11	3.14286	8.67622e-08	P13667, P30101, Q15084, Q9Y2B0, P14314, P14625, Q8NBS9, P27797, P07237, P11021, Q9Y4L1	348	61	20063	10.3963	8.45896e-05	2.81973e-05	0.000136639
INTERPRO	IPR012336:Thioredoxin-like fold	15	4.28571	1.62888e-07	P13667, P30041, Q9H299, O43396, P30101, P26641, Q15084, P35754, O00299, P09211, Q8NBS9, P07237, O43678, P32119, Q06830	350	130	18559	6.11835	0.000128022	3.2007e-05	0.000249454
GOTERM_BP_DIRECT	GO:0045454~cell redox homeostasis	12	3.42857	4.54358e-07	P30041, P13667, O43396, P30101, Q15084, Q9H299, P35754, P00390, Q8NBS9, P07237, P32119, Q06830	345	77	16792	7.58532	0.000736698	4.60595e-05	0.000762069
INTERPRO	IPR005788:Disulphide isomerase	5	1.42857	6.05611e-07	P13667, P30101, Q15084, Q8NBS9, P07237	350	5	18559	53.0257	0.000475897	6.79992e-05	0.000927455
INTERPRO	IPR013766:Thioredoxin domain	9	2.57143	8.02555e-07	P30041, P13667, O43396, P30101, Q15084, Q8NBS9, P07237, P32119, Q06830	350	41	18559	11.6398	0.00063061	7.8848e-05	0.00122906
GOTERM_CC_DIRECT	GO:0034663~endoplasmic reticulum chaperone complex	6	1.71429	1.0372e-06	Q15084, Q8WU39, P14625, P07237, P11021, Q9Y4L1	349	11	18224	28.4824	0.000441749	1.76737e-05	0.00145993
INTERPRO	IPR017937:Thioredoxin, conserved site	6	1.71429	1.17402e-05	P13667, O43396, P30101, Q15084, Q8NBS9, P07237	350	17	18559	18.715	0.0091854	0.000658915	0.0179779
UP_SEQ_FEATURE	domain:Thioredoxin 2	5	1.42857	1.701e-05	P13667, P30101, Q15084, Q8NBS9, P07237	348	10	20063	28.8261	0.0164482	0.00236647	0.0267853
UP_SEQ_FEATURE	domain:Thioredoxin 1	5	1.42857	1.701e-05	P13667, P30101, Q15084, Q8NBS9, P07237	348	10	20063	28.8261	0.0164482	0.00236647	0.0267853
GOTERM_BP_DIRECT	GO:0034976~response to endoplasmic reticulum stress	10	2.85714	2.18782e-05	P13667, P30101, Q15084, P14625, P13639, Q8NBS9, P07237, Q13148, Q9Y4L1, P16615	345	75	16792	6.48966	0.0348645	0.00147752	0.0366888
KEGG_PATHWAY	hsa04141:Protein processing in endoplasmic reticulum	17	4.85714	0.000179505	P30101, P55735, P34931, Q8NBS9, P27797, P54652, P13667, Q15084, P11142, P07900, P14314, P14625, P08238, P07237, P11021, Q9Y4L1, P55072	235	169	6910	2.95782	0.0321449	0.00326196	0.221288
PFAM	PF00085:Thioredoxin	6	1.71429	0.000221933	P13667, O43396, P30101, Q15084, Q8NBS9, P07237	342	29	17475	10.5717	0.0759758	0.0098285	0.303871
GOTERM_CC_DIRECT	GO:0005623~cell	9	2.57143	0.000660361	P30041, P13667, O43396, P30101, Q9H299, Q8NBS9, P07237, P32119, Q06830	349	100	18224	4.6996	0.245279	0.00737809	0.925511
GOTERM_MF_DIRECT	GO:0003756~protein disulfide isomerase activity	5	1.42857	0.00092704	P13667, P30101, Q15084, Q8NBS9, P07237	345	22	16881	11.1206	0.39285	0.0224256	1.34028
UP_KEYWORDS	Isomerase	9	2.57143	0.00113732	Q9Y536, P13667, P62937, P30101, Q15084, P60174, P18669, P07237, P14174	350	122	20581	4.33792	0.292446	0.00820288	1.51219
GOTERM_CC_DIRECT	GO:0005788~endoplasmic reticulum lumen	12	3.42857	0.00118513	P13667, P30101, Q15084, P14314, Q8WU39, P14625, Q969H8, Q8NBS9, P27797, P07237, P11021, Q9Y4L1	349	192	18224	3.26361	0.396593	0.0122455	1.6553
UP_SEQ_FEATURE	site:Lowers pKa of C-terminal Cys of second active site	3	0.857143	0.00174895	P30101, Q15084, P07237	348	4	20063	43.2392	0.81854	0.101178	2.71913
UP_SEQ_FEATURE	site:Lowers pKa of C-terminal Cys of first active site	3	0.857143	0.00174895	P30101, Q15084, P07237	348	4	20063	43.2392	0.81854	0.101178	2.71913
INTERPRO	IPR005792:Protein disulphide isomerase	3	0.857143	0.0020634	P13667, P30101, P07237	350	4	18559	39.7693	0.802794	0.0628765	3.11373
UP_SEQ_FEATURE	site:Contributes to redox potential value	3	0.857143	0.00591407	P30101, Q15084, P07237	348	7	20063	24.7081	0.996922	0.206525	8.9185
Annotation Cluster 14	Histone
Category	Term	Count	%	PValue	Genes	List Total	Pop Hits	Pop Total	Fold Enrichment	Bonferroni	Benjamini	FDR
INTERPRO	IPR005819:Histone H5	5	1.42857	1.43747e-05	Q02539, P16403, P16401, Q5SSJ5, Q92522	350	9	18559	29.4587	0.011235	0.000752956	0.0220118
PFAM	PF00538:linker histone H1 and H5 family	5	1.42857	6.23046e-05	Q02539, P16403, P16401, Q5SSJ5, Q92522	342	12	17475	21.2902	0.0219369	0.00316372	0.0853941
INTERPRO	IPR005818:Histone H1/H5	5	1.42857	0.000105988	Q02539, P16403, P16401, Q5SSJ5, Q92522	350	14	18559	18.9378	0.0799348	0.00519339	0.162191
GOTERM_MF_DIRECT	GO:0031490~chromatin DNA binding	6	1.71429	0.00646595	O75367, Q02539, P16403, P16401, Q9Y230, Q9P0M6	345	58	16881	5.06177	0.969498	0.092393	9.00599
Annotation Cluster 15	SAP domain
Category	Term	Count	%	PValue	Genes	List Total	Pop Hits	Pop Total	Fold Enrichment	Bonferroni	Benjamini	FDR
PFAM	PF02037:SAP domain	5	1.42857	0.000437869	Q13435, Q1KMD3, P12956, Q00839, P82979	342	19	17475	13.4464	0.144369	0.0154706	0.59871
UP_SEQ_FEATURE	domain:SAP	5	1.42857	0.000710699	Q13435, Q1KMD3, P12956, Q00839, P82979	348	24	20063	12.0109	0.500015	0.0519247	1.11341
INTERPRO	IPR003034:SAP domain	5	1.42857	0.000969786	Q13435, Q1KMD3, P12956, Q00839, P82979	350	24	18559	11.047	0.533558	0.0356638	1.47491
Annotation Cluster 16	TCA
Category	Term	Count	%	PValue	Genes	List Total	Pop Hits	Pop Total	Fold Enrichment	Bonferroni	Benjamini	FDR
KEGG_PATHWAY	hsa00620:Pyruvate metabolism	9	2.57143	4.61637e-05	Q6ZMR3, P24752, P40925, P11177, P40926, Q16822, P14618, P07195, P08559	235	40	6910	6.61596	0.0083668	0.00119956	0.0569521
UP_KEYWORDS	Tricarboxylic acid cycle	5	1.42857	0.000660314	P40925, P11177, P40926, Q99798, P08559	350	24	20581	12.2506	0.181925	0.00527032	0.880553
GOTERM_BP_DIRECT	GO:0006099~tricarboxylic acid cycle	5	1.42857	0.00274232	P40925, P11177, P40926, Q99798, P08559	345	29	16792	8.3918	0.98837	0.083631	4.5014
KEGG_PATHWAY	hsa00020:Citrate cycle (TCA cycle)	6	1.71429	0.00304005	P40925, P11177, P40926, Q16822, Q99798, P08559	235	30	6910	5.88085	0.425429	0.0417298	3.68749
KEGG_PATHWAY	hsa00630:Glyoxylate and dicarboxylate metabolism	5	1.42857	0.0121869	P24752, P40925, P40926, P34897, Q99798	235	27	6910	5.44523	0.892649	0.123022	14.0422
Annotation Cluster 17	Lactate metabolism
Category	Term	Count	%	PValue	Genes	List Total	Pop Hits	Pop Total	Fold Enrichment	Bonferroni	Benjamini	FDR
KEGG_PATHWAY	hsa00620:Pyruvate metabolism	9	2.57143	4.61637e-05	Q6ZMR3, P24752, P40925, P11177, P40926, Q16822, P14618, P07195, P08559	235	40	6910	6.61596	0.0083668	0.00119956	0.0569521
INTERPRO	IPR001236:Lactate/malate dehydrogenase, N-terminal	4	1.14286	0.000344194	Q6ZMR3, P40925, P40926, P07195	350	8	18559	26.5129	0.237065	0.01492	0.525816
INTERPRO	IPR022383:Lactate/malate dehydrogenase, C-terminal	4	1.14286	0.000344194	Q6ZMR3, P40925, P40926, P07195	350	8	18559	26.5129	0.237065	0.01492	0.525816
INTERPRO	IPR001557:L-lactate/malate dehydrogenase	4	1.14286	0.000344194	Q6ZMR3, P40925, P40926, P07195	350	8	18559	26.5129	0.237065	0.01492	0.525816
PFAM	PF00056:lactate/malate dehydrogenase, NAD binding domain	4	1.14286	0.000383502	Q6ZMR3, P40925, P40926, P07195	342	8	17475	25.5482	0.12764	0.015058	0.524553
PFAM	PF02866:lactate/malate dehydrogenase, alpha/beta C-terminal domain	4	1.14286	0.000383502	Q6ZMR3, P40925, P40926, P07195	342	8	17475	25.5482	0.12764	0.015058	0.524553
UP_SEQ_FEATURE	nucleotide phosphate-binding region:NAD	8	2.28571	0.000469199	Q6ZMR3, P40925, P04406, P40926, P12268, P07195, O43175, P21796	348	80	20063	5.76523	0.367185	0.0374135	0.736378
INTERPRO	IPR015955:Lactate dehydrogenase/glycoside hydrolase, family 4, C-terminal	4	1.14286	0.000509103	Q6ZMR3, P40925, P40926, P07195	350	9	18559	23.567	0.329852	0.0208458	0.776828
GOTERM_MF_DIRECT	GO:0051287~NAD binding	6	1.71429	0.000985976	P40925, P04406, P07195, O43175, P09874, P23526	345	38	16881	7.72586	0.411817	0.0228105	1.42492
UP_SEQ_FEATURE	binding site:NAD	6	1.71429	0.00237507	Q6ZMR3, P40925, P04406, P40926, P07195, O43175	348	54	20063	6.40581	0.901574	0.109456	3.67563
UP_KEYWORDS	NAD	10	2.85714	0.00307531	Q6ZMR3, P40925, P04406, P40926, P12268, O00217, P07195, O43175, P09874, P23526	350	175	20581	3.36016	0.607938	0.0189275	4.0403
UP_KEYWORDS	Oxidoreductase	19	5.42857	0.0108528	P40925, Q99536, P04406, P40926, P00390, P20674, P12268, O00217, P07195, O43175, Q6ZMR3, P30041, P11177, P11310, P07237, P08559, P32119, Q06830, P63104	350	582	20581	1.91968	0.963749	0.0565367	13.594
INTERPRO	IPR016040:NAD(P)-binding domain	9	2.57143	0.0202175	Q6ZMR3, P40925, P04406, Q99536, P40926, P22314, P07195, O43175, P23526	350	179	18559	2.6661	1	0.376352	26.8598
KEGG_PATHWAY	hsa00270:Cysteine and methionine metabolism	5	1.42857	0.0384474	Q6ZMR3, P40925, P40926, P07195, P23526	235	38	6910	3.86898	0.999204	0.257188	38.357
Annotation Cluster 18	Mrna
Category	Term	Count	%	PValue	Genes	List Total	Pop Hits	Pop Total	Fold Enrichment	Bonferroni	Benjamini	FDR
GOTERM_BP_DIRECT	GO:0006369~termination of RNA polymerase II transcription	8	2.28571	0.000324813	Q08170, P33240, Q86V81, P62318, Q9Y3Y2, O00148, P62304, P82979	345	64	16792	6.08406	0.409587	0.0163318	0.543399
UP_KEYWORDS	mRNA transport	9	2.57143	0.000449749	P12270, P55735, P22626, Q86V81, Q9Y3Y2, Q92945, P09651, P63241, P82979	350	106	20581	4.9927	0.127816	0.00368924	0.600539
GOTERM_BP_DIRECT	GO:0006405~RNA export from nucleus	7	2	0.000880724	P12270, Q08170, Q86V81, Q9Y3Y2, O00148, P09651, P82979	345	55	16792	6.19468	0.760491	0.0342571	1.46698
GOTERM_BP_DIRECT	GO:0031124~mRNA 3'-end processing	6	1.71429	0.00348881	Q08170, P33240, Q86V81, Q9Y3Y2, O00148, P82979	345	50	16792	5.8407	0.996548	0.0962727	5.69334
GOTERM_BP_DIRECT	GO:0006406~mRNA export from nucleus	8	2.28571	0.00447944	P12270, Q08170, P22626, Q86V81, Q9Y3Y2, O00148, P63241, P82979	345	100	16792	3.8938	0.999312	0.117989	7.25349
GOTERM_CC_DIRECT	GO:0000346~transcription export complex	3	0.857143	0.024681	Q86V81, Q9Y3Y2, P82979	349	13	18224	12.0503	0.999976	0.146915	29.6554
Annotation Cluster 19	Spliceosome
Category	Term	Count	%	PValue	Genes	List Total	Pop Hits	Pop Total	Fold Enrichment	Bonferroni	Benjamini	FDR
GOTERM_CC_DIRECT	GO:0071011~precatalytic spliceosome	6	1.71429	9.57019e-05	Q7RTV0, Q13435, P18583, P55769, P62318, P62304	349	25	18224	12.5323	0.039951	0.00135811	0.134624
GOTERM_CC_DIRECT	GO:0005686~U2 snRNP	4	1.14286	0.00618342	Q7RTV0, Q13435, P62318, P62304	349	20	18224	10.4436	0.928804	0.0486326	8.36043
GOTERM_CC_DIRECT	GO:0005689~U12-type spliceosomal complex	4	1.14286	0.0129635	Q7RTV0, Q13435, P62318, P62304	349	26	18224	8.0335	0.996146	0.0884807	16.7785
Annotation Cluster 20	14-3-3 protein
Category	Term	Count	%	PValue	Genes	List Total	Pop Hits	Pop Total	Fold Enrichment	Bonferroni	Benjamini	FDR
INTERPRO	IPR023409:14-3-3 protein, conserved site	5	1.42857	4.11421e-06	P27348, P62258, P31946, P61981, P63104	350	7	18559	37.8755	0.00322855	0.000293936	0.00630049
INTERPRO	IPR023410:14-3-3 domain	5	1.42857	4.11421e-06	P27348, P62258, P31946, P61981, P63104	350	7	18559	37.8755	0.00322855	0.000293936	0.00630049
INTERPRO	IPR000308:14-3-3 protein	5	1.42857	4.11421e-06	P27348, P62258, P31946, P61981, P63104	350	7	18559	37.8755	0.00322855	0.000293936	0.00630049
PFAM	PF00244:14-3-3 protein	5	1.42857	4.76046e-06	P27348, P62258, P31946, P61981, P63104	342	7	17475	36.4975	0.00169329	0.000338888	0.00652703
UP_SEQ_FEATURE	site:Interaction with phosphoserine on interacting protein	5	1.42857	5.82799e-06	P27348, P62258, P31946, P61981, P63104	348	8	20063	36.0327	0.0056662	0.000946603	0.00917795
GOTERM_BP_DIRECT	GO:0006605~protein targeting	6	1.71429	0.00113868	P27348, P62258, P62913, P31946, P61981, P63104	345	39	16792	7.48807	0.842447	0.0430459	1.8928
GOTERM_BP_DIRECT	GO:1900740~positive regulation of protein insertion into mitochondrial membrane involved in apoptotic signaling pathway	5	1.42857	0.0031138	P27348, P62258, P31946, P61981, P63104	345	30	16792	8.11208	0.993645	0.0878694	5.09632
GOTERM_BP_DIRECT	GO:0061024~membrane organization	5	1.42857	0.00395682	P27348, P62258, P31946, P61981, P63104	345	32	16792	7.60507	0.998389	0.106688	6.43346
KEGG_PATHWAY	hsa05169:Epstein-Barr virus infection	14	4	0.0120415	Q7KZF4, P11142, P27348, P34931, P62258, P08670, P06454, P54652, P62826, P31946, O00231, O15160, P61981, P63104	235	190	6910	2.16663	0.889734	0.12873	13.8859
KEGG_PATHWAY	hsa05203:Viral carcinogenesis	14	4	0.0213857	Q96A08, P33778, Q14839, P31946, P61981, P27348, Q7KZF4, P62993, P62258, P14618, P61978, P62807, P63104, P62805	235	205	6910	2.0081	0.980443	0.19634	23.4148
KEGG_PATHWAY	hsa04110:Cell cycle	10	2.85714	0.0244168	P33991, P27348, P62258, Q14683, P31946, Q9UQE7, P12004, P61981, Q14566, P63104	235	124	6910	2.37131	0.98888	0.210843	26.2912
Annotation Cluster 21	Repeat
Category	Term	Count	%	PValue	Genes	List Total	Pop Hits	Pop Total	Fold Enrichment	Bonferroni	Benjamini	FDR
UP_SEQ_FEATURE	repeat:1-2	6	1.71429	0.000239638	P18583, P22314, P27797, P31943, P61978, O60506	348	33	20063	10.4822	0.208381	0.0256298	0.376734
UP_SEQ_FEATURE	repeat:1-1	6	1.71429	0.000277007	P18583, P22314, P27797, P31943, P61978, O60506	348	34	20063	10.1739	0.236711	0.0242572	0.43536
UP_SEQ_FEATURE	repeat:2-1	5	1.42857	0.0021573	P18583, P27797, P31943, P61978, O60506	348	32	20063	9.00817	0.878233	0.110397	3.34396
UP_SEQ_FEATURE	repeat:2-2	5	1.42857	0.00270778	P18583, P27797, P31943, P61978, O60506	348	34	20063	8.47828	0.9289	0.118287	4.1803
UP_SEQ_FEATURE	repeat:2-3	3	0.857143	0.0420219	P18583, P27797, O60506	348	19	20063	9.10299	1	0.64881	49.1403
UP_SEQ_FEATURE	repeat:1-4	3	0.857143	0.0420219	P18583, P27797, O60506	348	19	20063	9.10299	1	0.64881	49.1403
UP_SEQ_FEATURE	repeat:1-3	3	0.857143	0.0461688	P18583, P27797, O60506	348	20	20063	8.64784	1	0.666231	52.499
Annotation Cluster 22	Pyruvate metabolism
Category	Term	Count	%	PValue	Genes	List Total	Pop Hits	Pop Total	Fold Enrichment	Bonferroni	Benjamini	FDR
KEGG_PATHWAY	hsa00620:Pyruvate metabolism	9	2.57143	4.61637e-05	Q6ZMR3, P24752, P40925, P11177, P40926, Q16822, P14618, P07195, P08559	235	40	6910	6.61596	0.0083668	0.00119956	0.0569521
UP_KEYWORDS	Pyruvate	5	1.42857	0.000162425	P11177, Q16822, P14618, P08559, P68871	350	17	20581	17.295	0.0481818	0.00145133	0.217269
KEGG_PATHWAY	hsa00020:Citrate cycle (TCA cycle)	6	1.71429	0.00304005	P40925, P11177, P40926, Q16822, Q99798, P08559	235	30	6910	5.88085	0.425429	0.0417298	3.68749
GOTERM_BP_DIRECT	GO:0006090~pyruvate metabolic process	4	1.14286	0.00983239	P11177, Q16822, P07195, P08559	345	22	16792	8.84954	1	0.204638	15.2725
Annotation Cluster 23	Catabolic process
Category	Term	Count	%	PValue	Genes	List Total	Pop Hits	Pop Total	Fold Enrichment	Bonferroni	Benjamini	FDR
GOTERM_BP_DIRECT	GO:0042744~hydrogen peroxide catabolic process	5	1.42857	0.000646731	P30041, P69905, P32119, P68871, Q06830	345	20	16792	12.1681	0.64983	0.0272364	1.07921
GOTERM_BP_DIRECT	GO:0000302~response to reactive oxygen species	6	1.71429	0.00113868	P30041, P09211, P00390, P07237, P32119, Q06830	345	39	16792	7.48807	0.842447	0.0430459	1.8928
INTERPRO	IPR024706:Peroxiredoxin, AhpC-type	3	0.857143	0.0020634	P30041, P32119, Q06830	350	4	18559	39.7693	0.802794	0.0628765	3.11373
INTERPRO	IPR000866:Alkyl hydroperoxide reductase subunit C/ Thiol specific antioxidant	3	0.857143	0.00339625	P30041, P32119, Q06830	350	5	18559	31.8154	0.931024	0.0977342	5.07663
INTERPRO	IPR019479:Peroxiredoxin, C-terminal	3	0.857143	0.00339625	P30041, P32119, Q06830	350	5	18559	31.8154	0.931024	0.0977342	5.07663
PFAM	PF10417:C-terminal domain of 1-Cys peroxiredoxin	3	0.857143	0.00365165	P30041, P32119, Q06830	342	5	17475	30.6579	0.728113	0.0953273	4.89234
PFAM	PF00578:AhpC/TSA family	3	0.857143	0.00365165	P30041, P32119, Q06830	342	5	17475	30.6579	0.728113	0.0953273	4.89234
UP_SEQ_FEATURE	active site:Cysteine sulfenic acid (-SOH) intermediate	3	0.857143	0.00427305	P30041, P32119, Q06830	348	6	20063	28.8261	0.984627	0.172858	6.52155
UP_SEQ_FEATURE	domain:Thioredoxin	4	1.14286	0.0190731	P30041, O43396, P32119, Q06830	348	33	20063	6.98816	1	0.476619	26.1607
UP_KEYWORDS	Antioxidant	3	0.857143	0.0228073	P30041, P32119, Q06830	350	14	20581	12.6006	0.999101	0.103798	26.5765
Annotation Cluster 24	DNA replication
Category	Term	Count	%	PValue	Genes	List Total	Pop Hits	Pop Total	Fold Enrichment	Bonferroni	Benjamini	FDR
UP_KEYWORDS	DNA replication	8	2.28571	0.00109959	P49321, P33991, Q04837, Q08945, Q16576, P12004, P39748, Q14566	350	94	20581	5.0045	0.284275	0.00812437	1.46237
GOTERM_BP_DIRECT	GO:0006260~DNA replication	10	2.85714	0.00470683	Q96PK6, P49321, P33316, P33991, Q04837, Q08945, Q16576, P12004, P39748, Q14566	345	155	16792	3.14016	0.999525	0.119743	7.60817
KEGG_PATHWAY	hsa03030:DNA replication	5	1.42857	0.0323184	P33991, Q04837, P12004, P39748, Q14566	235	36	6910	4.08392	0.997469	0.247774	33.3292
Annotation Cluster 25	DNA helicase
Category	Term	Count	%	PValue	Genes	List Total	Pop Hits	Pop Total	Fold Enrichment	Bonferroni	Benjamini	FDR
UP_KEYWORDS	Helicase	10	2.85714	0.00076168	P33991, P12956, Q14839, O00148, P17844, Q9Y230, Q9Y265, Q92841, Q14566, P60842	350	143	20581	4.11209	0.206768	0.00592186	1.01509
GOTERM_MF_DIRECT	GO:0004003~ATP-dependent DNA helicase activity	5	1.42857	0.00388329	P33991, P12956, Q14839, Q9Y230, Q14566	345	32	16881	7.64538	0.876717	0.0633212	5.50343
GOTERM_MF_DIRECT	GO:0003678~DNA helicase activity	4	1.14286	0.012363	P33991, Q9Y230, Q9Y265, Q14566	345	24	16881	8.15507	0.99876	0.150611	16.5553
Annotation Cluster 26	ATPase
Category	Term	Count	%	PValue	Genes	List Total	Pop Hits	Pop Total	Fold Enrichment	Bonferroni	Benjamini	FDR
INTERPRO	IPR000793:ATPase, F1/V1/A1 complex, alpha/beta subunit, C-terminal	3	0.857143	0.0010447	P06576, P38606, P25705	350	3	18559	53.0257	0.560257	0.0350898	1.58799
INTERPRO	IPR020003:ATPase, alpha/beta subunit, nucleotide-binding domain, active site	3	0.857143	0.00339625	P06576, P38606, P25705	350	5	18559	31.8154	0.931024	0.0977342	5.07663
INTERPRO	IPR000194:ATPase, F1/V1/A1 complex, alpha/beta subunit, nucleotide-binding domain	3	0.857143	0.00339625	P06576, P38606, P25705	350	5	18559	31.8154	0.931024	0.0977342	5.07663
INTERPRO	IPR004100:ATPase, alpha/beta subunit, N-terminal	3	0.857143	0.00339625	P06576, P38606, P25705	350	5	18559	31.8154	0.931024	0.0977342	5.07663
PFAM	PF02874:ATP synthase alpha/beta family, beta-barrel domain	3	0.857143	0.00365165	P06576, P38606, P25705	342	5	17475	30.6579	0.728113	0.0953273	4.89234
PFAM	PF00006:ATP synthase alpha/beta family, nucleotide-binding domain	3	0.857143	0.00365165	P06576, P38606, P25705	342	5	17475	30.6579	0.728113	0.0953273	4.89234
UP_KEYWORDS	Hydrogen ion transport	5	1.42857	0.00945082	P06576, P38606, P25705, P56385, O75947	350	49	20581	6.00029	0.944241	0.0520539	11.9397
Annotation Cluster 27	Arp2/3 complex
Category	Term	Count	%	PValue	Genes	List Total	Pop Hits	Pop Total	Fold Enrichment	Bonferroni	Benjamini	FDR
GOTERM_CC_DIRECT	GO:0005885~Arp2/3 protein complex	4	1.14286	0.00133614	P61160, O15144, P59998, P61158	349	12	18224	17.4059	0.434235	0.0131586	1.86439
GOTERM_BP_DIRECT	GO:0038096~Fc-gamma receptor signaling pathway involved in phagocytosis	9	2.57143	0.00464836	P01834, P07900, P61160, P01857, P08238, P62993, O15144, P59998, P61158	345	127	16792	3.44923	0.999478	0.120224	7.5171
GOTERM_BP_DIRECT	GO:0034314~Arp2/3 complex-mediated actin nucleation	4	1.14286	0.00983239	P61160, O15144, P59998, P61158	345	22	16792	8.84954	1	0.204638	15.2725
Annotation Cluster 28	Antigen processing and presentation
Category	Term	Count	%	PValue	Genes	List Total	Pop Hits	Pop Total	Fold Enrichment	Bonferroni	Benjamini	FDR
UP_KEYWORDS	Stress response	13	3.71429	1.29104e-07	P61604, P34932, P07900, P11142, P34931, Q58FF7, P08238, P14625, P10809, P54652, P98179, Q9Y4L1, Q99497	350	100	20581	7.64437	3.92468e-05	1.5699e-06	0.00017287
GOTERM_BP_DIRECT	GO:0006986~response to unfolded protein	8	2.28571	2.07385e-05	P61604, P07900, P34932, P11142, P34931, P08238, P10809, P54652	345	42	16792	9.27095	0.0330787	0.00146146	0.0347779
GOTERM_BP_DIRECT	GO:0042026~protein refolding	5	1.42857	0.000197574	P07900, P11142, P34931, P10809, P54652	345	15	16792	16.2242	0.274212	0.0113811	0.330865
KEGG_PATHWAY	hsa05134:Legionellosis	8	2.28571	0.00212704	P68104, P26641, O75396, P11142, P34931, P10809, P54652, P55072	235	54	6910	4.35619	0.321271	0.0317785	2.59338
KEGG_PATHWAY	hsa04612:Antigen processing and presentation	9	2.57143	0.00397168	P30101, P07900, P34932, P11142, P34931, P08238, P27797, Q06323, P54652	235	76	6910	3.48208	0.515329	0.0471384	4.79226
GOTERM_BP_DIRECT	GO:1900034~regulation of cellular response to heat	6	1.71429	0.0188176	P12270, P07900, P11142, P34931, P08238, P62258	345	75	16792	3.8938	1	0.30407	27.2852
GOTERM_BP_DIRECT	GO:0009409~response to cold	4	1.14286	0.0369808	P07900, P11310, P10809, P54652	345	36	16792	5.40805	1	0.441274	46.8483
Annotation Cluster 29	Actin binding
Category	Term	Count	%	PValue	Genes	List Total	Pop Hits	Pop Total	Fold Enrichment	Bonferroni	Benjamini	FDR
UP_SEQ_FEATURE	domain:ADF-H	3	0.857143	0.00779566	Q14019, P23528, Q9UJU6	348	8	20063	21.6196	0.999515	0.254338	11.596
INTERPRO	IPR002108:Actin-binding, cofilin/tropomyosin type	3	0.857143	0.014361	Q14019, P23528, Q9UJU6	350	10	18559	15.9077	0.999988	0.307025	19.8704
PFAM	PF00241:Cofilin/tropomyosin-type actin-binding protein	3	0.857143	0.015405	Q14019, P23528, Q9UJU6	342	10	17475	15.3289	0.996021	0.308199	19.1736
Annotation Cluster 30	Thiolase
Category	Term	Count	%	PValue	Genes	List Total	Pop Hits	Pop Total	Fold Enrichment	Bonferroni	Benjamini	FDR
INTERPRO	IPR020615:Thiolase, acyl-enzyme intermediate active site	3	0.857143	0.00339625	P24752, P22307, P42765	350	5	18559	31.8154	0.931024	0.0977342	5.07663
INTERPRO	IPR020617:Thiolase, C-terminal	3	0.857143	0.00503117	P24752, P22307, P42765	350	6	18559	26.5129	0.981022	0.132022	7.4336
INTERPRO	IPR002155:Thiolase	3	0.857143	0.00503117	P24752, P22307, P42765	350	6	18559	26.5129	0.981022	0.132022	7.4336
INTERPRO	IPR020616:Thiolase, N-terminal	3	0.857143	0.00503117	P24752, P22307, P42765	350	6	18559	26.5129	0.981022	0.132022	7.4336
INTERPRO	IPR020613:Thiolase, conserved site	3	0.857143	0.00503117	P24752, P22307, P42765	350	6	18559	26.5129	0.981022	0.132022	7.4336
PFAM	PF02803:Thiolase, C-terminal domain	3	0.857143	0.00540697	P24752, P22307, P42765	342	6	17475	25.5482	0.854867	0.128783	7.16421
PFAM	PF00108:Thiolase, N-terminal domain	3	0.857143	0.00540697	P24752, P22307, P42765	342	6	17475	25.5482	0.854867	0.128783	7.16421
GOTERM_MF_DIRECT	GO:0016747~transferase activity, transferring acyl groups other than amino-acyl groups	3	0.857143	0.0135597	P24752, P22307, P42765	345	9	16881	16.3101	0.999354	0.157022	18.0143
INTERPRO	IPR016039:Thiolase-like	3	0.857143	0.0173363	P24752, P22307, P42765	350	11	18559	14.4616	0.999999	0.349202	23.4957
Annotation Cluster 31	DNA repair
Category	Term	Count	%	PValue	Genes	List Total	Pop Hits	Pop Total	Fold Enrichment	Bonferroni	Benjamini	FDR
UP_KEYWORDS	DNA repair	13	3.71429	0.0044834	Q15233, Q08945, P12956, Q14683, Q9UMS4, Q9Y230, Q9UQE7, P09874, P23246, Q9Y265, P12004, P39748, P55072	350	293	20581	2.609	0.744879	0.0264291	5.83934
GOTERM_BP_DIRECT	GO:0006281~DNA repair	12	3.42857	0.00940344	Q96PK6, Q15233, Q08945, Q14683, Q9Y230, Q9UQE7, P09874, Q9Y265, P39748, P55072, Q13263, P06748	345	235	16792	2.4854	1	0.199161	14.6547
UP_KEYWORDS	DNA damage	13	3.71429	0.0173444	Q15233, Q08945, P12956, Q14683, Q9UMS4, Q9Y230, Q9UQE7, P09874, P23246, Q9Y265, P12004, P39748, P55072	350	352	20581	2.1717	0.995102	0.0835025	20.8859
UP_KEYWORDS	DNA recombination	5	1.42857	0.0489161	Q15233, P12956, Q9Y230, P23246, Q9Y265	350	81	20581	3.62981	1	0.195719	48.9083
Annotation Cluster 32	KH domain
Category	Term	Count	%	PValue	Genes	List Total	Pop Hits	Pop Total	Fold Enrichment	Bonferroni	Benjamini	FDR
UP_SEQ_FEATURE	domain:KH 3	4	1.14286	0.0019997	Q96AE4, Q92945, P61978, Q15365	348	15	20063	15.3739	0.857961	0.108458	3.10325
UP_SEQ_FEATURE	domain:KH 1	4	1.14286	0.00792973	Q96AE4, Q92945, P61978, Q15365	348	24	20063	9.60872	0.999575	0.249858	11.7839
UP_SEQ_FEATURE	domain:KH 2	4	1.14286	0.00792973	Q96AE4, Q92945, P61978, Q15365	348	24	20063	9.60872	0.999575	0.249858	11.7839
PFAM	PF00013:KH domain	4	1.14286	0.0327168	Q96AE4, Q92945, P61978, Q15365	342	36	17475	5.67739	0.999993	0.463808	36.6246
INTERPRO	IPR004087:K Homology domain	4	1.14286	0.0342484	Q96AE4, Q92945, P61978, Q15365	350	38	18559	5.58165	1	0.463411	41.3561
INTERPRO	IPR004088:K Homology domain, type 1	4	1.14286	0.0495628	Q96AE4, Q92945, P61978, Q15365	350	44	18559	4.82052	1	0.550265	54.0897
Annotation Cluster 33	Actin
Category	Term	Count	%	PValue	Genes	List Total	Pop Hits	Pop Total	Fold Enrichment	Bonferroni	Benjamini	FDR
INTERPRO	IPR020902:Actin/actin-like conserved site	4	1.14286	0.00681969	P61160, Q6S8J3, P61158, Q562R1	350	21	18559	10.1001	0.995386	0.164135	9.9493
INTERPRO	IPR004000:Actin-related protein	4	1.14286	0.0256565	P61160, Q6S8J3, P61158, Q562R1	350	34	18559	6.23832	1	0.415858	32.8367
PFAM	PF00022:Actin	4	1.14286	0.0282073	P61160, Q6S8J3, P61158, Q562R1	342	34	17475	6.01135	0.999962	0.450741	32.4512
Annotation Cluster 34	HSP
Category	Term	Count	%	PValue	Genes	List Total	Pop Hits	Pop Total	Fold Enrichment	Bonferroni	Benjamini	FDR
INTERPRO	IPR020575:Heat shock protein Hsp90, N-terminal	4	1.14286	0.000509103	P07900, Q58FF7, P08238, P14625	350	9	18559	23.567	0.329852	0.0208458	0.776828
INTERPRO	IPR001404:Heat shock protein Hsp90	4	1.14286	0.000972413	P07900, Q58FF7, P08238, P14625	350	11	18559	19.2821	0.534521	0.0341614	1.47887
PFAM	PF00183:Hsp90 protein	4	1.14286	0.00108176	P07900, Q58FF7, P08238, P14625	342	11	17475	18.5805	0.319763	0.0344222	1.47308
INTERPRO	IPR020568:Ribosomal protein S5 domain 2-type fold	6	1.71429	0.00135931	P62249, P07900, Q58FF7, P08238, P14625, P13639	350	44	18559	7.23078	0.656697	0.0435699	2.06157
INTERPRO	IPR019805:Heat shock protein Hsp90, conserved site	3	0.857143	0.0020634	P07900, P08238, P14625	350	4	18559	39.7693	0.802794	0.0628765	3.11373
PFAM	PF02518:Histidine kinase-, DNA gyrase B-, and HSP90-like ATPase	4	1.14286	0.00281514	P07900, Q58FF7, P08238, P14625	342	15	17475	13.6257	0.633443	0.0802317	3.79162
INTERPRO	IPR003594:Histidine kinase-like ATPase, ATP-binding domain	4	1.14286	0.0237149	P07900, Q58FF7, P08238, P14625	350	33	18559	6.42736	1	0.407861	30.7576
GOTERM_BP_DIRECT	GO:0006950~response to stress	5	1.42857	0.0362567	P07900, Q58FF7, P08238, P14625, P06748	345	61	16792	3.98955	1	0.440976	46.174
Annotation Cluster 35	Mitochondrion
Category	Term	Count	%	PValue	Genes	List Total	Pop Hits	Pop Total	Fold Enrichment	Bonferroni	Benjamini	FDR
GOTERM_CC_DIRECT	GO:0005743~mitochondrial inner membrane	21	6	0.00033169	P24752, P40926, Q9BPW8, P49411, P42765, P12236, P34897, P20674, P56385, O43678, P21796, P05141, P06576, P35232, P54819, P31930, P10809, P25705, Q02978, O75947, P22695	349	441	18224	2.48656	0.131791	0.00402967	0.46587
UP_KEYWORDS	Mitochondrion inner membrane	13	3.71429	0.00233071	P12236, P34897, P20674, P56385, O43678, P05141, P06576, P35232, P31930, P25705, O75947, Q02978, P22695	350	270	20581	2.83125	0.508043	0.0146697	3.07616
KEGG_PATHWAY	hsa05012:Parkinson's disease	13	3.71429	0.00304225	P05141, P06576, P31930, P22314, P12236, P25705, P20674, O75947, O00217, O43678, P22695, Q99497, P21796	235	142	6910	2.69194	0.42566	0.0388353	3.69011
UP_KEYWORDS	Electron transport	7	2	0.0102666	O43396, P35754, P31930, P13804, O00217, O43678, P22695	350	108	20581	3.8113	0.956594	0.0554431	12.9058
KEGG_PATHWAY	hsa00190:Oxidative phosphorylation	10	2.85714	0.0361533	P06576, P31930, P38606, P25705, P20674, P56385, O75947, O00217, O43678, P22695	235	133	6910	2.21085	0.998771	0.25277	36.5174
Annotation Cluster 36	Mitochondrial synthesis
Category	Term	Count	%	PValue	Genes	List Total	Pop Hits	Pop Total	Fold Enrichment	Bonferroni	Benjamini	FDR
GOTERM_BP_DIRECT	GO:0006754~ATP biosynthetic process	6	1.71429	0.000277677	P06576, P04075, P25705, P56385, P14618, O75947	345	29	16792	10.0702	0.362661	0.014903	0.464715
GOTERM_CC_DIRECT	GO:0005753~mitochondrial proton-transporting ATP synthase complex	4	1.14286	0.00711319	P06576, P25705, P56385, O75947	349	21	18224	9.94624	0.952215	0.0547593	9.55985
GOTERM_BP_DIRECT	GO:0042776~mitochondrial ATP synthesis coupled proton transport	4	1.14286	0.00862052	P06576, P25705, P56385, O75947	345	21	16792	9.27095	0.999999	0.191661	13.5163
UP_KEYWORDS	Hydrogen ion transport	5	1.42857	0.00945082	P06576, P38606, P25705, P56385, O75947	350	49	20581	6.00029	0.944241	0.0520539	11.9397
UP_KEYWORDS	ATP synthesis	3	0.857143	0.0294149	P06576, P25705, P56385	350	16	20581	11.0255	0.999886	0.126692	32.9529
KEGG_PATHWAY	hsa00190:Oxidative phosphorylation	10	2.85714	0.0361533	P06576, P31930, P38606, P25705, P20674, P56385, O75947, O00217, O43678, P22695	235	133	6910	2.21085	0.998771	0.25277	36.5174
GOTERM_MF_DIRECT	GO:0046933~proton-transporting ATP synthase activity, rotational mechanism	3	0.857143	0.0460341	P06576, P25705, O75947	345	17	16881	8.63478	1	0.403955	49.6232
Annotation Cluster 37	Histone
Category	Term	Count	%	PValue	Genes	List Total	Pop Hits	Pop Total	Fold Enrichment	Bonferroni	Benjamini	FDR
UP_SEQ_FEATURE	chain:Histone H3.2	3	0.857143	0.0236622	P68431, Q71DI3, P20671	348	14	20063	12.3541	1	0.529124	31.4172
UP_SEQ_FEATURE	chain:Histone H2A type 1-D	3	0.857143	0.0236622	P68431, Q71DI3, P20671	348	14	20063	12.3541	1	0.529124	31.4172
UP_SEQ_FEATURE	chain:Histone H3.1	3	0.857143	0.0236622	P68431, Q71DI3, P20671	348	14	20063	12.3541	1	0.529124	31.4172
Annotation Cluster 38	DNA
Category	Term	Count	%	PValue	Genes	List Total	Pop Hits	Pop Total	Fold Enrichment	Bonferroni	Benjamini	FDR
GOTERM_MF_DIRECT	GO:0031492~nucleosomal DNA binding	7	2	0.000322859	P84243, Q16695, O75367, P07910, P68431, Q14839, Q71DI3	345	46	16881	7.44594	0.159473	0.00910182	0.468691
GOTERM_BP_DIRECT	GO:0045814~negative regulation of gene expression, epigenetic	7	2	0.000525946	P84243, O75367, P68431, Q16576, Q71DI3, Q9P0M6, P62805	345	50	16792	6.81414	0.573997	0.0234243	0.878492
INTERPRO	IPR000164:Histone H3	4	1.14286	0.00510835	P84243, Q16695, P68431, Q71DI3	350	19	18559	11.1633	0.982145	0.129606	7.54351
GOTERM_BP_DIRECT	GO:0045815~positive regulation of gene expression, epigenetic	6	1.71429	0.0087358	P84243, O75367, P68431, Q71DI3, O15160, P62805	345	62	16792	4.71024	0.999999	0.19137	13.6848
GOTERM_BP_DIRECT	GO:0031047~gene silencing by RNA	7	2	0.0266785	P84243, P12270, Q7KZF4, P68431, P62826, Q71DI3, P62805	345	111	16792	3.06943	1	0.363753	36.4627
GOTERM_MF_DIRECT	GO:0042393~histone binding	7	2	0.0388125	P84243, Q16695, P68431, P06454, Q71DI3, P06748, P62805	345	122	16881	2.80748	1	0.364365	43.7813
GOTERM_BP_DIRECT	GO:0000183~chromatin silencing at rDNA	4	1.14286	0.0396519	P84243, P68431, Q71DI3, P62805	345	37	16792	5.26189	1	0.461575	49.2676
Annotation Cluster 39	Signaling pathways
Category	Term	Count	%	PValue	Genes	List Total	Pop Hits	Pop Total	Fold Enrichment	Bonferroni	Benjamini	FDR
GOTERM_BP_DIRECT	GO:0043488~regulation of mRNA stability	12	3.42857	8.4437e-06	P62987, P11142, P28070, P25787, P40306, Q92945, Q06323, Q14103, P31946, O00231, Q8NC51, P63104	345	103	16792	5.67058	0.0136024	0.000651965	0.0141612
GOTERM_CC_DIRECT	GO:0000502~proteasome complex	7	2	0.000975946	O43396, P28070, P25787, P40306, Q06323, O00231, P55072	349	60	18224	6.09207	0.340291	0.0106089	1.36499
UP_KEYWORDS	Proteasome	6	1.71429	0.00200683	O43396, P28070, P25787, P40306, Q06323, O00231	350	53	20581	6.65693	0.457023	0.0134792	2.65399
GOTERM_BP_DIRECT	GO:0038061~NIK/NF-kappaB signaling	6	1.71429	0.0112952	P62987, P28070, P25787, P40306, Q06323, O00231	345	66	16792	4.42477	1	0.223064	17.3476
GOTERM_BP_DIRECT	GO:0060071~Wnt signaling pathway, planar cell polarity pathway	7	2	0.0115555	P62987, P07737, P28070, P25787, P40306, Q06323, O00231	345	92	16792	3.70334	1	0.224896	17.7118
GOTERM_BP_DIRECT	GO:0051436~negative regulation of ubiquitin-protein ligase activity involved in mitotic cell cycle	6	1.71429	0.0151574	P62987, P28070, P25787, P40306, Q06323, O00231	345	71	16792	4.11317	1	0.263499	22.5992
GOTERM_BP_DIRECT	GO:0051603~proteolysis involved in cellular protein catabolic process	5	1.42857	0.0165918	P28070, P25787, P40306, P09668, P11021	345	48	16792	5.07005	1	0.281757	24.4685
GOTERM_BP_DIRECT	GO:0051437~positive regulation of ubiquitin-protein ligase activity involved in regulation of mitotic cell cycle transition	6	1.71429	0.0198158	P62987, P28070, P25787, P40306, Q06323, O00231	345	76	16792	3.84256	1	0.314418	28.5161
GOTERM_BP_DIRECT	GO:0006521~regulation of cellular amino acid metabolic process	5	1.42857	0.0203213	P28070, P25787, P40306, Q06323, O00231	345	51	16792	4.77181	1	0.318028	29.1319
GOTERM_BP_DIRECT	GO:0002223~stimulatory C-type lectin receptor signaling pathway	7	2	0.0209635	P62987, P28070, P25787, P40306, Q06323, O00231, Q13404	345	105	16792	3.24483	1	0.320307	29.907
GOTERM_BP_DIRECT	GO:0031145~anaphase-promoting complex-dependent catabolic process	6	1.71429	0.0230164	P62987, P28070, P25787, P40306, Q06323, O00231	345	79	16792	3.69664	1	0.336703	32.3318
GOTERM_BP_DIRECT	GO:0038095~Fc-epsilon receptor signaling pathway	9	2.57143	0.0305092	P62987, P01834, P62993, P28070, P25787, P40306, Q06323, O00231, Q13404	345	178	16792	2.46097	1	0.395023	40.5291
GOTERM_BP_DIRECT	GO:0002479~antigen processing and presentation of exogenous peptide antigen via MHC class I, TAP-dependent	5	1.42857	0.0401086	P28070, P25787, P40306, Q06323, O00231	345	63	16792	3.86289	1	0.459243	49.6708
UP_KEYWORDS	Threonine protease	3	0.857143	0.0445587	P28070, P25787, P40306	350	20	20581	8.82043	0.999999	0.181944	45.6835
INTERPRO	IPR001353:Proteasome, subunit alpha/beta	3	0.857143	0.0488496	P28070, P25787, P40306	350	19	18559	8.37248	1	0.552184	53.5593
Annotation Cluster 40	Chaperone
Category	Term	Count	%	PValue	Genes	List Total	Pop Hits	Pop Total	Fold Enrichment	Bonferroni	Benjamini	FDR
INTERPRO	IPR017998:Chaperone tailless complex polypeptide 1 (TCP-1)	3	0.857143	0.0205478	P10809, P17987, Q99832	350	12	18559	13.2564	1	0.37265	27.2365
INTERPRO	IPR027413:GroEL-like equatorial domain	3	0.857143	0.0315028	P10809, P17987, Q99832	350	15	18559	10.6051	1	0.458628	38.7502
INTERPRO	IPR002423:Chaperonin Cpn60/TCP-1	3	0.857143	0.0355634	P10809, P17987, Q99832	350	16	18559	9.94232	1	0.468732	42.5672
INTERPRO	IPR027409:GroEL-like apical domain	3	0.857143	0.0355634	P10809, P17987, Q99832	350	16	18559	9.94232	1	0.468732	42.5672
PFAM	PF00118:TCP-1/cpn60 chaperonin family	3	0.857143	0.038044	P10809, P17987, Q99832	342	16	17475	9.58059	0.999999	0.481867	41.2463
Annotation Cluster 41	Immunoglobulin
Category	Term	Count	%	PValue	Genes	List Total	Pop Hits	Pop Total	Fold Enrichment	Bonferroni	Benjamini	FDR
GOTERM_BP_DIRECT	GO:0006911~phagocytosis, engulfment	6	1.71429	0.000686436	P01834, P01871, P01857, B9A064, P01876, P35579	345	35	16792	8.34385	0.671685	0.0281546	1.14511
GOTERM_MF_DIRECT	GO:0034987~immunoglobulin receptor binding	5	1.42857	0.00177691	P01834, P01871, P01857, B9A064, P01876	345	26	16881	9.4097	0.61589	0.0348174	2.55428
GOTERM_BP_DIRECT	GO:0050871~positive regulation of B cell activation	5	1.42857	0.00181147	P01834, P01871, P01857, B9A064, P01876	345	26	16792	9.36009	0.94718	0.0606542	2.99526
UP_KEYWORDS	Immunoglobulin C region	4	1.14286	0.00189048	P01834, P01871, P01857, P01876	350	15	20581	15.6808	0.437436	0.0132888	2.50192
GOTERM_BP_DIRECT	GO:0006910~phagocytosis, recognition	5	1.42857	0.00240237	P01834, P01871, P01857, B9A064, P01876	345	28	16792	8.69151	0.979785	0.0750601	3.95392
GOTERM_BP_DIRECT	GO:0050853~B cell receptor signaling pathway	6	1.71429	0.00487314	P01834, P29350, P01871, P01857, B9A064, P01876	345	54	16792	5.40805	0.999638	0.121812	7.86678
INTERPRO	IPR003006:Immunoglobulin/major histocompatibility complex, conserved site	5	1.42857	0.0262818	P01834, P01871, P01857, B9A064, P01876	350	60	18559	4.41881	1	0.415363	33.4937
INTERPRO	IPR003597:Immunoglobulin C1-set	5	1.42857	0.0391156	P01834, P01871, P01857, B9A064, P01876	350	68	18559	3.89895	1	0.494289	45.7227
PFAM	PF07654:Immunoglobulin C1-set domain	5	1.42857	0.0399267	P01834, P01871, P01857, B9A064, P01876	342	66	17475	3.87095	0.999999	0.482806	42.8035
Annotation Cluster 42	Lamin
Category	Term	Count	%	PValue	Genes	List Total	Pop Hits	Pop Total	Fold Enrichment	Bonferroni	Benjamini	FDR
UP_SEQ_FEATURE	region of interest:Linker 2	4	1.14286	0.00100484	Q03252, P02545, P20700, Q16352	348	12	20063	19.2174	0.624769	0.0676204	1.57083
GOTERM_CC_DIRECT	GO:0005638~lamin filament	3	0.857143	0.00212686	Q03252, P02545, P20700	349	4	18224	39.1633	0.59627	0.019954	2.95246
INTERPRO	IPR001322:Lamin Tail Domain	3	0.857143	0.00339625	Q03252, P02545, P20700	350	5	18559	31.8154	0.931024	0.0977342	5.07663
PFAM	PF00932:Lamin Tail Domain	3	0.857143	0.00365165	Q03252, P02545, P20700	342	5	17475	30.6579	0.728113	0.0953273	4.89234
UP_SEQ_FEATURE	region of interest:Coil 2	5	1.42857	0.0301506	Q03252, P02545, P20700, P08670, Q16352	348	68	20063	4.23914	1	0.595264	38.2539
INTERPRO	IPR018039:Intermediate filament protein, conserved site	5	1.42857	0.0323246	Q03252, P02545, P20700, P08670, Q16352	350	64	18559	4.14263	1	0.451531	39.5414
UP_SEQ_FEATURE	region of interest:Linker 1	5	1.42857	0.0393503	Q03252, P02545, P20700, P08670, Q16352	348	74	20063	3.89543	1	0.64301	46.8599
UP_SEQ_FEATURE	region of interest:Coil 1A	5	1.42857	0.0393503	Q03252, P02545, P20700, P08670, Q16352	348	74	20063	3.89543	1	0.64301	46.8599
UP_SEQ_FEATURE	region of interest:Coil 1B	5	1.42857	0.0393503	Q03252, P02545, P20700, P08670, Q16352	348	74	20063	3.89543	1	0.64301	46.8599
UP_SEQ_FEATURE	region of interest:Rod	5	1.42857	0.0410225	Q03252, P02545, P20700, P08670, Q16352	348	75	20063	3.84349	1	0.649078	48.2982
UP_KEYWORDS	Intermediate filament	5	1.42857	0.0418955	Q03252, P02545, P20700, P08670, Q16352	350	77	20581	3.81837	0.999998	0.174143	43.6208
UP_SEQ_FEATURE	region of interest:Head	5	1.42857	0.0444864	Q03252, P02545, P20700, P08670, Q16352	348	77	20063	3.74366	1	0.661138	51.1622
UP_SEQ_FEATURE	region of interest:Tail	5	1.42857	0.0481092	Q03252, P02545, P20700, P08670, Q16352	348	79	20063	3.64888	1	0.673054	53.9982
Annotation Cluster 43	Negative regulation of translation
Category	Term	Count	%	PValue	Genes	List Total	Pop Hits	Pop Total	Fold Enrichment	Bonferroni	Benjamini	FDR
GOTERM_CC_DIRECT	GO:0097452~GAIT complex	3	0.857143	0.00212686	P04406, P40429, O60506	349	4	18224	39.1633	0.59627	0.019954	2.95246
GOTERM_BP_DIRECT	GO:0017148~negative regulation of translation	5	1.42857	0.0308977	Q12906, P04406, P27797, P40429, O60506	345	58	16792	4.1959	1	0.395906	40.9276
Annotation Cluster 44	Septin
Category	Term	Count	%	PValue	Genes	List Total	Pop Hits	Pop Total	Fold Enrichment	Bonferroni	Benjamini	FDR
GOTERM_CC_DIRECT	GO:0031105~septin complex	3	0.857143	0.00350004	Q15019, Q16181, Q14141	349	5	18224	31.3307	0.775445	0.0312798	4.81544
UP_KEYWORDS	Centromere	8	2.28571	0.00893905	P12270, Q14683, P46060, Q15019, P30153, Q9UQE7, Q16181, Q14141	350	137	20581	3.43374	0.93476	0.0501997	11.3285
UP_KEYWORDS	Kinetochore	6	1.71429	0.0267282	P12270, Q14683, P46060, Q15019, Q16181, Q14141	350	99	20581	3.56381	0.999735	0.119008	30.4247
PFAM	PF00735:Septin	3	0.857143	0.0295953	Q15019, Q16181, Q14141	342	14	17475	10.9492	0.999977	0.447977	33.7621
INTERPRO	IPR016491:Septin	3	0.857143	0.0315028	Q15019, Q16181, Q14141	350	15	18559	10.6051	1	0.458628	38.7502
GOTERM_CC_DIRECT	GO:0030496~midbody	7	2	0.0374808	P14625, Q15019, P11021, P62826, P31150, Q16181, Q14141	349	129	18224	2.83352	1	0.204836	41.5918
Annotation Cluster 45	Glucose metabolism
Category	Term	Count	%	PValue	Genes	List Total	Pop Hits	Pop Total	Fold Enrichment	Bonferroni	Benjamini	FDR
GOTERM_BP_DIRECT	GO:0006006~glucose metabolic process	6	1.71429	0.0120069	Q01469, P04406, P11177, Q12904, Q02978, P08559	345	67	16792	4.35873	1	0.229904	18.3398
UP_KEYWORDS	Glucose metabolism	3	0.857143	0.0445587	P11177, Q12904, P08559	350	20	20581	8.82043	0.999999	0.181944	45.6835
Annotation Cluster 46	DNA recombination
Category	Term	Count	%	PValue	Genes	List Total	Pop Hits	Pop Total	Fold Enrichment	Bonferroni	Benjamini	FDR
UP_KEYWORDS	DNA recombination	5	1.42857	0.0489161	Q15233, P12956, Q9Y230, P23246, Q9Y265	350	81	20581	3.62981	1	0.195719	48.9083
Annotation Cluster 47	Globin
Category	Term	Count	%	PValue	Genes	List Total	Pop Hits	Pop Total	Fold Enrichment	Bonferroni	Benjamini	FDR
UP_KEYWORDS	Oxygen transport	3	0.857143	0.0197679	P69905, P02042, P68871	350	13	20581	13.5699	0.997688	0.0932579	23.459
UP_SEQ_FEATURE	metal ion-binding site:Iron (heme distal ligand)	3	0.857143	0.0205134	P69905, P02042, P68871	348	13	20063	13.3044	1	0.490139	27.8497
GOTERM_CC_DIRECT	GO:0005833~hemoglobin complex	3	0.857143	0.0211474	P69905, P02042, P68871	349	12	18224	13.0544	0.999889	0.128867	25.9818
INTERPRO	IPR000971:Globin	3	0.857143	0.0239857	P69905, P02042, P68871	350	13	18559	12.2367	1	0.402945	31.0511
INTERPRO	IPR009050:Globin-like	3	0.857143	0.0239857	P69905, P02042, P68871	350	13	18559	12.2367	1	0.402945	31.0511
PFAM	PF00042:Globin	3	0.857143	0.0256938	P69905, P02042, P68871	342	13	17475	11.7915	0.999905	0.439631	30.0159
INTERPRO	IPR012292:Globin, structural domain	3	0.857143	0.0276405	P69905, P02042, P68871	350	14	18559	11.3627	1	0.423502	34.9008
UP_SEQ_FEATURE	metal ion-binding site:Iron (heme proximal ligand)	3	0.857143	0.0305042	P69905, P02042, P68871	348	16	20063	10.8098	1	0.588675	38.6074
GOTERM_MF_DIRECT	GO:0005344~oxygen transporter activity	3	0.857143	0.0320559	P69905, P02042, P68871	345	14	16881	10.4851	1	0.31686	37.7498
GOTERM_BP_DIRECT	GO:0015671~oxygen transport	3	0.857143	0.0368519	P69905, P02042, P68871	345	15	16792	9.73449	1	0.443232	46.7289
Annotation Cluster 48	GST
Category	Term	Count	%	PValue	Genes	List Total	Pop Hits	Pop Total	Fold Enrichment	Bonferroni	Benjamini	FDR
UP_SEQ_FEATURE	domain:GST C-terminal	4	1.14286	0.0258286	P26641, O00299, P09211, P24534	348	37	20063	6.23268	1	0.549459	33.775
INTERPRO	IPR010987:Glutathione S-transferase, C-terminal-like	4	1.14286	0.0415479	P26641, O00299, P09211, P24534	350	41	18559	5.17324	1	0.508193	47.7891
Annotation Cluster 49	Helicase
Category	Term	Count	%	PValue	Genes	List Total	Pop Hits	Pop Total	Fold Enrichment	Bonferroni	Benjamini	FDR
UP_KEYWORDS	Helicase	10	2.85714	0.00076168	P33991, P12956, Q14839, O00148, P17844, Q9Y230, Q9Y265, Q92841, Q14566, P60842	350	143	20581	4.11209	0.206768	0.00592186	1.01509
UP_SEQ_FEATURE	short sequence motif:Q motif	4	1.14286	0.0316294	O00148, P17844, Q92841, P60842	348	40	20063	5.76523	1	0.591531	39.72
INTERPRO	IPR014014:RNA helicase, DEAD-box type, Q motif	4	1.14286	0.0319773	O00148, P17844, Q92841, P60842	350	37	18559	5.73251	1	0.455675	39.2081
Annotation Cluster 50	Purine biosynthesis
Category	Term	Count	%	PValue	Genes	List Total	Pop Hits	Pop Total	Fold Enrichment	Bonferroni	Benjamini	FDR
UP_KEYWORDS	Purine biosynthesis	3	0.857143	0.0197679	P22234, P12268, P31939	350	13	20581	13.5699	0.997688	0.0932579	23.459
GOTERM_BP_DIRECT	GO:0009168~purine ribonucleoside monophosphate biosynthetic process	3	0.857143	0.0281195	P22234, P12268, P31939	345	13	16792	11.2321	1	0.373312	38.0221
Annotation Cluster 51	Antibacterial humoral response
Category	Term	Count	%	PValue	Genes	List Total	Pop Hits	Pop Total	Fold Enrichment	Bonferroni	Benjamini	FDR
GOTERM_BP_DIRECT	GO:0019731~antibacterial humoral response	5	1.42857	0.0123338	P62861, P01871, P01876, P59665, P62807	345	44	16792	5.53096	1	0.232691	18.7918
Annotation Cluster 52	Centromere
Category	Term	Count	%	PValue	Genes	List Total	Pop Hits	Pop Total	Fold Enrichment	Bonferroni	Benjamini	FDR
UP_KEYWORDS	Centromere	8	2.28571	0.00893905	P12270, Q14683, P46060, Q15019, P30153, Q9UQE7, Q16181, Q14141	350	137	20581	3.43374	0.93476	0.0501997	11.3285
UP_KEYWORDS	Kinetochore	6	1.71429	0.0267282	P12270, Q14683, P46060, Q15019, Q16181, Q14141	350	99	20581	3.56381	0.999735	0.119008	30.4247
Annotation Cluster 53	Proteolysis
Category	Term	Count	%	PValue	Genes	List Total	Pop Hits	Pop Total	Fold Enrichment	Bonferroni	Benjamini	FDR
GOTERM_BP_DIRECT	GO:0051603~proteolysis involved in cellular protein catabolic process	5	1.42857	0.0165918	P28070, P25787, P40306, P09668, P11021	345	48	16792	5.07005	1	0.281757	24.4685
Annotation Cluster 54	Cytoskeleton
Category	Term	Count	%	PValue	Genes	List Total	Pop Hits	Pop Total	Fold Enrichment	Bonferroni	Benjamini	FDR
COG_ONTOLOGY	Cytoskeleton	3	0.857143	0.0432862	Q14651, P37802, P13796	23	31	2026	8.52454	0.437443	0.437443	25.3955
Annotation Cluster 55	Electron carrier activity
Category	Term	Count	%	PValue	Genes	List Total	Pop Hits	Pop Total	Fold Enrichment	Bonferroni	Benjamini	FDR
GOTERM_MF_DIRECT	GO:0009055~electron carrier activity	7	2	0.0101863	Q9H299, P35754, P11310, P00390, P13804, P20674, O43175	345	90	16881	3.8057	0.995947	0.134939	13.8393
Annotation Cluster 56	LIM binding
Category	Term	Count	%	PValue	Genes	List Total	Pop Hits	Pop Total	Fold Enrichment	Bonferroni	Benjamini	FDR
UP_SEQ_FEATURE	domain:LIM zinc-binding	3	0.857143	0.0420219	O00151, Q9BT23, Q14847	348	19	20063	9.10299	1	0.64881	49.1403

## Sheet: 1547_N_CB_CC_M
Annotation Cluster 1	Mitochondrion													Mitochondrion
Category	Term	Count	%	PValue	Genes	List Total	Pop Hits	Pop Total	Fold Enrichment	Bonferroni	Benjamini	FDR		mRNA processing
UP_KEYWORDS	Mitochondrion	228	14.8341	1.07922e-46	P00367, Q9NX46, Q99417, O75964, Q3ZCQ8, Q709C8, Q9UDW1, Q9Y696, Q86U28, P23396, P78537, Q5T440, P13995, Q00059, Q9NSE4, P00156, Q16740, Q9P015, P41250, P23434, Q9UKU7, P13073, Q8NI60, Q07812, P00846, O60313, P55957, Q16836, P23368, Q9NS69, P17252, P09669, Q5SRD1, Q9Y676, O75380, O75489, P14927, Q8N4T8, P21953, P19367, Q92506, Q9BUR5, P55084, Q16718, P07954, O75390, Q9NUJ1, P49748, Q9H2W6, O95831,…	1532	1119	20581	2.73724	5.13709e-44	1.02742e-44	1.54337e-43		Ribonucleoprotein
UP_SEQ_FEATURE	transit peptide:Mitochondrion	116	7.54717	1.67321e-29	P00367, P42126, P53597, Q3ZCQ8, Q96EY7, Q86U28, P19404, Q5T440, Q9HAV7, P08574, P13995, Q00059, Q9NSE4, Q9P015, Q16740, P23434, Q9UKU7, P13073, Q8NI60, Q6NVY1, P42704, O95881, O60313, Q16836, Q9H2U2, P23368, P53007, P09622, Q8TEA8, Q969P6, P31040, Q9Y676, P30048, P30049, Q16795, O75380, P35914, P51649, O75489, P21953, Q12931, P31937, P55084, P40939, P07954, O75251, O75390, O75306, Q9NUJ1, P49748,…	1520	482	20063	3.17661	6.5523e-26	6.5523e-26	3.10229e-26		Cell-cell adhesion
UP_KEYWORDS	Transit peptide	122	7.93754	2.65556e-29	Q9NX46, P00367, P42126, P53597, Q3ZCQ8, Q96EY7, Q6P587, Q86U28, P19404, Q5T440, Q9HAV7, P08574, P13995, Q00059, Q9NSE4, Q9P015, Q16740, P23434, Q9UKU7, P13073, Q8NI60, Q6NVY1, P42704, O60313, Q16836, Q9H2U2, P23368, P53007, P09622, Q969P6, P31040, P30042, Q9Y676, Q9BQP7, P30048, P30049, Q16795, O75380, P35914, P51649, O75489, P21953, Q12931, P31937, P55084, P40939, P07954, O75390, O75251, O75306,…	1532	536	20581	3.05776	1.26405e-26	1.05337e-27	3.79766e-26		RNA binding
GOTERM_CC_DIRECT	GO:0005759~mitochondrial matrix	81	5.27001	2.9607e-19	P49748, Q9NX46, P00367, P36404, P53597, P42126, P47897, Q99714, P48735, P30405, Q9HCC0, P43897, Q96I99, Q86U28, P36542, P36957, P23396, Q14197, P78537, Q5T440, Q9HAV7, P13995, Q00059, Q9NSE4, Q16740, P41250, Q02218, P23434, Q9UKU7, P24539, Q9Y237, O95299, Q6NVY1, P38117, Q5U5X0, P23919, P04179, P28331, Q16836, Q9P2R7, Q9H2U2, Q53H82, P23368, Q9UIJ7, P00441, P00505, P36776, O75439, Q8N163, O95571,…	1511	327	18224	2.98756	2.4337e-16	1.73835e-17	4.56088e-16		mRNA transport
														mRNA export
Annotation Cluster 2	mRNA processing													Nucleotide binding
Category	Term	Count	%	PValue	Genes	List Total	Pop Hits	Pop Total	Fold Enrichment	Bonferroni	Benjamini	FDR		Chaperone
GOTERM_BP_DIRECT	GO:0000398~mRNA splicing, via spliceosome	102	6.6363	3.387e-48	Q15287, O60306, O75494, Q9UQ35, Q15717, Q14331, O95777, O43290, Q16629, Q8N684, O43390, Q9BUJ2, P08579, P52434, Q13151, P52435, Q8IYB3, Q8WYA6, Q9UKF6, P19388, P19387, P11940, P55795, P67809, Q12996, Q15459, Q8IX12, P38159, Q13595, Q8WWY3, Q7L014, P62306, P41223, Q6UN15, Q9UK45, Q6P2Q9, Q9P2I0, O43395, P26368, Q9BUQ8, Q13838, P52756, P53803, Q8WVK2, O75400, P61326, O43719, O43447, Q01130, Q09161,…	1475	222	16792	5.23067	1.35717e-44	1.35717e-44	6.2954e-45		Signaling pathways
UP_KEYWORDS	mRNA processing	110	7.1568	2.14413e-42	Q15287, Q9UPN6, O60306, Q9C0J8, O75494, Q9UQ35, Q16630, O95777, Q14331, O43290, Q16629, Q8N684, O43390, Q96J01, P08579, Q9Y3F4, Q8IYB3, Q9UKF6, Q86W42, Q8WYA6, P11940, Q9UKV3, P67809, Q15007, Q12996, Q92879, O15116, Q15459, P38159, Q13595, Q8WWY3, Q92797, Q7L014, P62306, Q8N163, Q9Y2W1, Q6UN15, Q32P51, Q9UK45, Q6P2Q9, Q9P2I0, O43395, P26368, Q5BKZ1, Q9NP77, Q9BUQ8, O95232, Q13838, P52756, Q92499,…	1532	332	20581	4.45105	1.02061e-39	1.13401e-40	3.06627e-39		Ribosomal protein
UP_KEYWORDS	mRNA splicing	96	6.24593	1.58317e-41	Q15287, Q09161, Q9UPN6, O60306, O75494, Q15029, Q9UQ35, P14678, Q15428, Q99459, Q15427, O95777, Q13523, Q92620, Q14331, O43290, Q9BWF3, Q16629, Q9H307, O43390, Q13243, Q9BQ04, P62995, Q13242, Q96J01, P08579, Q9Y3F4, P52298, O94906, Q8IYB3, P49756, Q9NW64, Q13247, Q86W42, Q8WYA6, Q9UNP9, Q07955, P62312, Q15020, P11940, P62314, Q96DI7, Q9UKV3, P62316, O43143, Q96C86, P67809, Q9Y5S9, Q15007, Q15393,…	1532	260	20581	4.96027	7.53591e-39	7.53591e-40	2.26406e-38		Mitochondrion
KEGG_PATHWAY	hsa03040:Spliceosome	72	4.68445	6.44514e-31	Q09161, O60306, O75494, Q15029, P14678, Q15428, Q99459, Q15427, O95777, Q92620, O43290, Q16629, Q13243, P62995, Q13242, Q96J01, P08579, P52298, O94906, P49756, Q9NW64, Q13247, Q8WYA6, Q9UNP9, Q07955, P62312, P62314, Q96DI7, Q9UKV3, P62316, O43143, Q9Y5S9, Q15393, Q9Y3B4, Q15459, P09661, P62310, P38159, P84103, Q13595, Q86XP3, Q8WWY3, Q7L014, O75533, P62306, P41223, Q9Y333, Q32P51, Q9UHX1, P09012,…	854	133	6910	4.38027	1.75308e-28	1.75308e-28	8.48387e-28		Eukaryotic complex
UP_KEYWORDS	Spliceosome	56	3.64346	6.14623e-29	Q9UPN6, O60306, Q15029, Q9UQ35, P14678, Q15428, Q15427, Q99459, Q14331, Q13523, Q92620, O95777, O43290, O43390, Q9H307, P08579, O94906, Q9NW64, Q8IYB3, Q8WYA6, Q07955, Q9UNP9, P62312, P11940, P62314, Q96DI7, P62316, Q9Y5S9, Q15393, Q15459, P09661, P62310, P38159, Q8WWY3, O75533, P62306, Q9Y333, Q32P51, P09012, O75934, Q9UK45, Q6P2Q9, Q9Y3C6, P38919, Q15637, O43395, A8MWD9, P26368, O75643, Q9BUQ8,…	1532	127	20581	5.92369	2.9256e-26	2.25046e-27	8.78959e-26		Proteasome
GOTERM_CC_DIRECT	GO:0071013~catalytic step 2 spliceosome	42	2.7326	8.79846e-21	O60306, O75533, P62306, Q15029, Q9UQ35, Q9Y333, P14678, Q15428, Q99459, Q14331, Q13523, Q92620, O43290, O43390, Q9H307, O75934, Q9UK45, Q6P2Q9, Q9Y3C6, P38919, P08579, O94906, O75643, Q9NW64, Q8IYB3, Q9BUQ8, Q07955, Q9UNP9, P11940, Q9H2H8, Q96DI7, P62314, P62316, Q9Y5S9, Q15393, Q9Y3B4, P61326, Q96A72, Q15459, P09661, P38159, P62310	1511	92	18224	5.50606	7.23233e-18	6.02694e-19	1.35538e-17		Nuclear proteins
GOTERM_BP_DIRECT	GO:0008380~RNA splicing	54	3.51334	1.70119e-17	Q15287, Q09161, Q9UPN6, Q15029, P14678, Q15428, Q15427, Q13523, Q9BWF3, Q16629, Q9BQ04, Q13427, Q96J01, Q96SB3, P52298, O94906, P49756, Q8IYB3, Q86W42, P62312, P62314, Q96DI7, Q9UKV3, P62316, O43143, P67775, Q9Y5S9, Q15007, Q15393, O15116, P09661, P62306, Q8N163, Q9Y2W1, O00422, Q9HB90, Q14498, Q32P51, Q9UHX1, O75934, Q6P2Q9, P38919, P98175, O43395, Q5BKZ1, Q9BUQ8, O95232, Q13838, P52756, Q05519,…	1475	166	16792	3.70336	6.81667e-14	4.00981e-15	3.162e-14		Golgi
GOTERM_CC_DIRECT	GO:0005681~spliceosomal complex	38	2.47235	9.9273e-17	Q9UPN6, O60306, O75533, P62306, Q15029, P41223, Q8N163, P14678, Q15428, Q15427, O95777, Q32P51, P09012, O43390, O75934, Q6P2Q9, Q15637, P08579, O43395, A8MWD9, O94906, P26368, Q5BKZ1, O75643, Q9BZZ5, P49756, Q8WYA6, Q13838, P52756, P62312, P62316, P08621, Q15393, Q15459, O43447, Q01130, P09661, Q9Y4Z0	1511	94	18224	4.87568	9.12603e-14	5.32907e-15	1.66533e-13		GTP-binding
GOTERM_BP_DIRECT	GO:0006397~mRNA processing	46	2.99284	6.01689e-11	Q9UPN6, Q9H0D6, Q07666, Q9C0J8, Q15029, Q8N163, Q16630, Q9Y2W1, Q15428, Q5T8P6, O00422, Q14498, Q15427, Q9BWF3, Q32P51, Q9UHX1, Q16629, Q13243, O43390, O75934, Q9BQ04, Q13242, Q6P2Q9, P17612, O43809, P98175, Q13151, O43395, P26368, Q5BKZ1, Q8IYB3, P49756, Q07955, Q9UKV3, O43143, Q9Y5S9, Q15007, Q05519, P08621, Q15393, Q92879, O15116, Q96A72, Q15459, Q01130, P62310	1475	179	16792	2.9256	2.41097e-07	6.51613e-09	1.11836e-07		TCA
														RNA helicase
Annotation Cluster 3	Ribonucleoprotein													Cell cycle
Category	Term	Count	%	PValue	Genes	List Total	Pop Hits	Pop Total	Fold Enrichment	Bonferroni	Benjamini	FDR		RNA binding
UP_KEYWORDS	Ribonucleoprotein	107	6.96161	2.76104e-45	O60812, Q71UM5, O95777, P62269, P62857, P61247, O43390, P62266, P61313, P62854, P23396, Q9BUJ2, P62851, P08579, Q13151, Q86WX3, Q16540, Q9P015, Q6P5R6, Q9UKF6, O00567, P55795, Q02878, P82932, O15116, O60783, P39023, P38159, Q8WWY3, Q9NX24, P62306, P63173, P62979, Q32P51, Q9Y676, P84098, P62906, Q9UK45, Q6P2Q9, P62244, P82921, Q9UHB9, P42766, Q5JNZ5, P05388, Q8NHW5, P62841, P50914, Q14764, Q9Y3U8,…	1532	296	20581	4.85624	1.31426e-42	2.19043e-43	3.94851e-42		Transport vesicle
UP_KEYWORDS	Ribosomal protein	65	4.22902	8.55843e-27	Q9H2W6, Q71UM5, Q07020, P62277, P61353, P18621, P62269, P62857, P62266, P61247, P52815, Q6P1L8, P61313, P23396, P62854, P62851, Q8IXM3, P15880, Q86WX3, Q6NVV1, Q16540, Q6P5R6, Q9P015, Q96GC5, P83881, Q9H0U6, Q9NWU5, P62917, Q02878, Q9Y3B7, P82932, O60783, Q9BYN8, P39023, Q9Y2R9, P35268, P63173, P62979, Q9BYD6, P82663, P82664, Q9Y676, P84098, P62906, P62244, Q8N983, P82921, P46781, Q13405, P46783,…	1532	185	20581	4.72008	4.07381e-24	2.71588e-25	1.22392e-23		DNA replication
GOTERM_BP_DIRECT	GO:0006413~translational initiation	57	3.70852	2.36173e-24	P60228, P62277, Q07020, Q14240, P61353, P47813, P18621, P62269, P62857, P62266, P61247, P61313, P23396, P62854, P62851, P15880, O75822, O75821, Q04637, P41567, P83881, Q13347, P11940, O15372, O60841, P62917, O15371, Q02878, P56537, P39023, Q7L2H7, P35268, P63173, P61221, P62979, Q15056, O60739, P84098, P62906, P62244, P46781, Q8NE71, P46783, P42766, P05388, Q14152, P55884, Q9Y262, P06730, P62841,…	1475	137	16792	4.73658	9.46347e-21	3.15449e-21	4.38974e-21		Viral nucleoprotein
GOTERM_CC_DIRECT	GO:0005840~ribosome	60	3.90371	3.69158e-23	Q71UM5, P62277, Q07020, P61353, Q96EY4, P62269, P62857, P61247, P62266, Q6P1L8, P61313, P23396, P62854, P62851, O43583, P15880, Q86WX3, Q6NVV1, Q16540, Q6P5R6, P83881, Q9H0U6, P62917, Q02878, Q9Y3B7, O60783, P39023, Q9Y2R9, P35268, P63173, P62979, P82663, Q9Y676, P82664, P84098, P62906, P62244, Q8N983, Q15637, P82921, Q9UHB9, P46781, Q13405, P27695, P27824, P46783, Q8NE71, Q9Y2Q9, P42766, Q92616,…	1511	166	18224	4.35936	3.03448e-20	3.03448e-21	5.68678e-20		LSM domain
GOTERM_BP_DIRECT	GO:0019083~viral transcription	46	2.99284	1.73311e-19	P35268, Q07020, P62277, P61353, Q8NFH4, Q8NFH5, P63173, P62979, Q92621, P18621, Q8TEM1, P49792, P62269, P84098, O75694, P62857, P62906, Q8N1F7, P61247, P62266, P57740, Q7Z3B4, Q9BW27, P62244, P61313, P62854, P23396, P62851, P46781, Q12769, P15880, P46783, Q8WUM0, P42766, Q99567, P05388, P52948, P83881, P62917, Q02878, P62841, P50914, P35658, Q9Y3U8, P39023, P62847	1475	112	16792	4.67574	6.94457e-16	6.94457e-17	3.22132e-16		Signalosome
GOTERM_BP_DIRECT	GO:0006412~translation	69	4.48926	1.36748e-17	Q71UM5, Q13765, P62277, Q07020, Q15029, P61353, P18621, P62269, P62857, P62266, P61247, Q6P1L8, P61313, P23396, P62854, P62851, Q8IXM3, P15880, Q6NVV1, Q16540, Q9P015, Q04637, Q6P5R6, P83881, Q6NUK1, Q9H0U6, Q9NWU5, Q00325, Q9NSD9, P62917, Q02878, Q9Y3B7, P82932, P49591, O60783, P39023, P53007, P14868, Q9Y2R9, P35268, Q9NX24, P63173, P62979, Q9BYD6, Q9Y676, P84098, P62906, P62244, Q8N983, P82921,…	1475	253	16792	3.10484	5.4795e-14	3.42468e-15	2.54173e-14		Isomerase
GOTERM_BP_DIRECT	GO:0000184~nuclear-transcribed mRNA catabolic process, nonsense-mediated decay	45	2.92778	1.84314e-17	P60228, Q15287, Q09161, P35268, Q07020, P62277, P61353, P63173, P62979, P18621, P62269, P84098, P62857, P62906, P61247, P62266, P62244, P61313, P38919, P62854, Q92900, P23396, P62851, P46781, P15880, P46783, Q9BRP8, P52298, P42766, P05388, P62495, Q04637, P83881, P11940, P67775, Q9Y5S9, P62917, Q02878, P62841, P50914, P61326, Q96A72, Q9Y3U8, P39023, P62847	1475	119	16792	4.30503	7.38544e-14	4.10302e-15	3.42583e-14		Proteasome
GOTERM_BP_DIRECT	GO:0006364~rRNA processing	62	4.03383	3.04016e-17	Q71UM5, Q13868, Q9H0D6, Q9Y2L1, P62277, Q07020, Q9H583, P61353, Q14331, P18621, P62269, P62857, P62266, P61247, Q9UQ80, P61313, P23396, P62854, P62851, P15880, Q9NQT5, Q9Y2X3, Q9BVJ6, O00567, P22087, P83881, Q9Y237, Q15061, P62917, Q02878, Q9Y3B2, Q92979, P39023, P35268, Q14978, Q14692, P63173, P62979, O60832, Q12788, P84098, P62906, Q96AZ6, P62244, P38919, P46781, Q969X6, Q9NR30, P46783, P42766,…	1475	214	16792	3.29829	1.21819e-13	6.41154e-15	5.65074e-14		Kinetochore
GOTERM_MF_DIRECT	GO:0003735~structural constituent of ribosome	62	4.03383	3.68286e-16	Q9H2W6, Q71UM5, Q07020, P62277, P61353, P18621, P62269, P62857, P61247, P62266, P52815, Q6P1L8, P61313, P23396, P62854, Q8IXM3, P15880, Q6NVV1, Q16540, Q6P5R6, Q9P015, P83881, Q6NUK1, Q9H0U6, Q9NWU5, Q00325, P62917, Q02878, Q9Y3B7, P82932, O60783, P39023, P53007, Q9Y2R9, P35268, P63173, P62979, Q9BYD6, P82663, Q9Y676, P84098, P62906, P62244, Q8N983, P82921, P46781, Q13405, P46783, P42766, Q5JNZ5,…	1490	222	16881	3.1641	4.51639e-13	9.03722e-14	5.44009e-13		Immunity/Immunoglobulin/MHC
GOTERM_BP_DIRECT	GO:0006614~SRP-dependent cotranslational protein targeting to membrane	36	2.34223	3.19756e-14	Q9Y5M8, P35268, P62277, Q07020, P61353, P63173, P62979, P18621, P62269, P84098, P62857, P61247, P62906, P62266, Q9UNL2, P62244, Q9UHB9, P61313, P62854, P23396, P62851, P46781, P15880, P46783, P61011, P42766, P05388, P83881, O76094, P62917, Q02878, P62841, P50914, Q9Y3U8, P39023, P62847	1475	94	16792	4.35999	1.28122e-10	4.92772e-12	5.94302e-11		Nucleus
KEGG_PATHWAY	hsa03010:Ribosome	47	3.05791	3.91516e-11	Q71UM5, P35268, Q9Y2R9, Q07020, P62277, P61353, P63173, P62979, P18621, Q9BYD6, P82664, P62269, P84098, P62857, P62906, P61247, P62266, P52815, Q6P1L8, P62244, P61313, P82921, P62854, P23396, P62851, P46781, P15880, P46783, Q16540, P42766, P05388, Q96L21, Q6P5R6, Q9P015, P83881, Q9H0U6, Q9NWU5, P62917, Q9Y3B7, Q02878, P62841, P50914, P82932, O60783, Q9Y3U8, P39023, P62847	854	136	6910	2.79627	1.06493e-08	1.52132e-09	5.15362e-08		Annexin
GOTERM_CC_DIRECT	GO:0022625~cytosolic large ribosomal subunit	23	1.49642	1.32861e-08	P35268, P42766, Q9NX24, P05388, Q96L21, Q6P5R6, Q07020, P61353, Q9UKD2, P63173, P83881, P18621, Q9BYD6, Q8NHW5, P84098, P62917, P62906, Q02878, P50914, O76021, P61313, Q9Y3U8, P39023	1511	68	18224	4.07942	1.09211e-05	3.2121e-07	2.04669e-05		Glycolysis
														Chromatin regulator
Annotation Cluster 4	Cell-cell adhesion													HEAT
Category	Term	Count	%	PValue	Genes	List Total	Pop Hits	Pop Total	Fold Enrichment	Bonferroni	Benjamini	FDR		snRNP
GOTERM_CC_DIRECT	GO:0005913~cell-cell adherens junction	79	5.13988	1.87078e-18	P46940, P07355, P60228, P62820, Q01082, P42224, Q7L1Q6, Q9UHD8, P31947, O00571, Q9H444, P31949, P50402, P61313, P62854, Q9Y266, P42566, P42167, O75955, P15880, P26196, P04083, Q04637, P21333, Q14677, Q9Y5X3, O00560, Q07960, O00567, O60749, Q13813, P28072, Q15149, P47756, Q02878, P63244, Q99439, Q13596, P18206, P61026, Q9HC38, P25685, P43487, Q9Y5K6, P54136, Q86UP2, P51610, Q9UH65, Q9H223, Q15056,…	1511	323	18224	2.94988	1.53778e-15	9.61113e-17	2.88189e-15		Mitochondrion
GOTERM_MF_DIRECT	GO:0098641~cadherin binding involved in cell-cell adhesion	76	4.9447	4.15331e-18	P46940, P07355, P60228, P62820, Q01082, P42224, Q7L1Q6, Q9UHD8, P31947, O00571, Q9H444, P31949, P50402, P61313, P62854, Q9Y266, P42566, P42167, P15880, P26196, P04083, Q04637, P21333, Q14677, Q9Y5X3, O00560, Q07960, O00567, O60749, Q13813, P28072, Q15149, P47756, Q02878, P63244, Q99439, Q13596, P18206, P61026, Q9HC38, P25685, P43487, Q9Y5K6, P54136, Q86UP2, P51610, Q9UH65, Q9H223, Q15056, P52907,…	1490	290	16881	2.96912	5.63188e-15	1.40797e-15	6.81661e-15		Chaperone
GOTERM_BP_DIRECT	GO:0098609~cell-cell adhesion	71	4.61939	4.48458e-17	P46940, P07355, P60228, P62820, Q01082, P42224, Q7L1Q6, Q9UHD8, P31947, O00571, Q9H444, P31949, P50402, P61313, Q9Y266, P42566, P42167, P15880, P26196, Q04637, Q14677, Q9Y5X3, O00560, Q07960, O00567, O60749, Q13813, P28072, Q15149, P47756, Q02878, P63244, Q99439, Q13596, P61026, Q9HC38, P25685, P43487, P54136, Q86UP2, Q9UH65, P51610, Q9H223, Q15056, P52907, P46109, P08195, Q9UHX1, Q09666, P50990,…	1475	271	16792	2.98263	1.79697e-13	8.557e-15	8.33546e-14		Iron-sulfur
														Succinyl metabolic process
Annotation Cluster 5	RNA binding													WD repeat
Category	Term	Count	%	PValue	Genes	List Total	Pop Hits	Pop Total	Fold Enrichment	Bonferroni	Benjamini	FDR		Mitochondrion
UP_KEYWORDS	RNA-binding	169	10.9954	1.80809e-47	O60812, Q15287, Q9NTZ6, Q9UPN6, O60306, Q13868, Q9Y2L1, O75494, Q3ZCQ8, O00571, Q9UQ35, Q16630, Q15717, O95777, Q14331, Q96EY7, P05455, P49792, Q13283, P62269, Q16629, Q8N684, O43390, Q08257, Q9BUJ2, Q96J01, P23396, P08579, Q08J23, Q13151, P26196, Q9BRP8, P49588, Q8IYB3, O75821, Q8TDD1, Q04637, Q9UKF6, P54577, Q86W42, Q01844, Q99729, P46087, P55795, P11940, Q9NZJ9, Q9UKV3, P42704, P67809, Q92879,…	1532	665	20581	3.41407	8.6065e-45	2.15162e-45	2.58571e-44		Aminoacyl
PFAM	PF00076:RNA recognition motif. (a.k.a. RRM, RBD, or RNP domain)	66	4.29408	1.32634e-21	O60812, Q15287, Q9NTZ6, Q9UPN6, O75494, Q16630, Q5T8P6, Q15717, Q15427, Q9BWF3, P31483, Q15424, Q13283, P05455, Q16629, Q8N684, Q13243, O43390, P62995, Q9BQ04, Q13242, P08579, Q13151, P52298, Q9NW64, O75821, P49756, Q13247, Q01844, Q99729, Q9UNP9, Q07955, P55795, Q15020, P11940, P35637, Q9Y5S9, Q92879, Q9Y3B4, P38159, P84103, Q13595, Q9NWH9, Q92804, O15047, Q9BY77, Q14498, Q15056, Q32P51, Q9UHX1,…	1444	211	17475	3.7854	1.66057e-18	1.66057e-18	2.15556e-18		Chromosome condensation
INTERPRO	IPR000504:RNA recognition motif domain	67	4.35914	5.95275e-21	O60812, Q15287, Q9NTZ6, Q9UPN6, O75494, Q16630, Q5T8P6, Q15717, Q15427, Q9BWF3, P31483, Q15424, Q13283, P05455, Q16629, Q8N684, Q13243, O43390, P62995, Q9BQ04, Q13242, P08579, Q13151, P52298, O75821, P49756, Q9NW64, Q13247, Q01844, Q99729, Q9UNP9, Q07955, P55795, Q15020, P11940, P35637, Q9Y5S9, Q92879, Q9Y3B4, P38159, P84103, Q13595, Q9NWH9, Q92804, O15047, Q9BY77, Q14498, Q15056, Q32P51, Q9UHX1,…	1504	226	18559	3.65825	1.40009e-17	1.40009e-17	1.04284e-17		CS domain
INTERPRO	IPR012677:Nucleotide-binding, alpha-beta plait	72	4.68445	3.35277e-20	O60812, Q15287, Q9NTZ6, Q9UPN6, O75494, Q16630, Q5T8P6, Q15717, Q15427, Q9BWF3, P31483, Q15424, Q13283, P05455, Q16629, Q8N684, O43390, Q13243, P62995, Q9BQ04, Q13242, P08579, Q13151, Q16540, P52298, O75821, P49756, Q9NW64, Q13247, Q01844, Q99729, Q9UNP9, Q07955, P55795, Q15020, P11940, Q9UKV3, P35637, Q9Y5S9, Q92879, Q9Y3B4, P38159, P84103, Q13595, Q9NWH9, Q8NFH5, Q92804, O15047, Q9BY77, Q14498,…	1504	264	18559	3.36539	7.88572e-17	3.94286e-17	5.87359e-17		PWI domain
GOTERM_MF_DIRECT	GO:0000166~nucleotide binding	81	5.27001	7.11962e-16	O60812, Q15287, Q9NTZ6, Q9UPN6, O75494, Q9Y5Y2, Q16630, Q5T8P6, Q15717, Q15427, Q9BWF3, P31483, Q15424, Q13283, P05455, O14983, Q16629, Q8N684, O43390, Q13243, P62995, Q9BQ04, Q13242, P05023, P08579, Q13151, Q16540, P52298, P49756, O75821, Q9NW64, Q13247, Q01844, Q99729, Q9UNP9, Q07955, Q15020, P55795, P11940, Q9UKV3, P35637, Q9Y5S9, P53384, Q92879, Q9Y3B4, P38159, Q9Y277, P84103, Q13595, Q9NWH9,…	1490	348	16881	2.63705	9.03277e-13	1.50546e-13	1.08802e-12		DNA repair
UP_SEQ_FEATURE	domain:RRM	35	2.27716	2.83759e-10	O60812, Q15287, P84103, Q9UPN6, Q9NWH9, Q13595, O75494, Q16630, Q92804, O15047, Q9BY77, Q15056, Q15424, P05455, Q13283, Q16629, Q8N684, P62995, Q4G0J3, P52298, Q9NW64, O75821, P49756, Q01844, P55884, Q9UNP9, Q14011, O15042, P35637, Q9Y5S9, Q05519, P08621, Q9Y3B4, Q01130, P38159	1520	135	20063	3.42205	1.1112e-06	2.2224e-07	5.26115e-07		Rhythmic process
UP_SEQ_FEATURE	domain:RRM 2	33	2.14704	6.02588e-10	Q9NTZ6, Q15717, Q5T8P6, Q15427, Q14498, Q9BWF3, P31483, Q32P51, Q9UHX1, Q13243, P09012, O43390, Q9BQ04, Q13242, O00425, P98175, P08579, Q13151, P26368, Q13247, Q9NZI8, Q96EP5, Q8WXF1, Q99729, Q07955, P83881, P52756, P11940, Q15020, P55795, Q92879, O43719, P43243	1520	125	20063	3.48463	2.35973e-06	3.93289e-07	1.11725e-06		Ubiquitin
UP_SEQ_FEATURE	domain:RRM 1	33	2.14704	6.02588e-10	Q9NTZ6, Q15717, Q5T8P6, Q15427, Q14498, Q9BWF3, P31483, Q32P51, Q9UHX1, Q13243, P09012, O43390, Q9BQ04, Q13242, O00425, P98175, P08579, Q13151, P26368, Q13247, Q9NZI8, Q96EP5, Q8WXF1, Q99729, Q07955, P83881, P52756, P11940, Q15020, P55795, Q92879, O43719, P43243	1520	125	20063	3.48463	2.35973e-06	3.93289e-07	1.11725e-06		Iron-sulfur
														Catabolic process
Annotation Cluster 6	mRNA transport													Isomerase
Category	Term	Count	%	PValue	Genes	List Total	Pop Hits	Pop Total	Fold Enrichment	Bonferroni	Benjamini	FDR		Antigen processing/MHC II
GOTERM_BP_DIRECT	GO:0006406~mRNA export from nucleus	44	2.86272	4.86519e-20	Q15287, P84103, Q09161, O75152, O75494, Q8NFH4, Q8NFH5, Q9BY77, Q6UN15, Q92620, Q92621, Q8TEM1, P49792, O75694, Q16629, Q13243, Q8N1F7, P57740, Q7Z3B4, Q13242, Q9BW27, P38919, Q9P2I0, Q96J01, Q92900, Q12769, Q8WUM0, P52298, P26368, Q99567, Q13247, Q8IYB3, Q9UKF6, Q86W42, Q9NUU7, P52948, Q13838, Q07955, P06730, Q9Y5S9, Q05519, P61326, P35658, Q01130	1475	100	16792	5.00914	1.94948e-16	2.16609e-17	9.04291e-17		Actin binding
UP_KEYWORDS	mRNA transport	39	2.53741	4.4193e-17	P84103, Q09161, O75152, Q9UIA9, Q8NFH4, Q8NFH5, Q9BY77, Q92621, Q32P51, P61970, Q8TEM1, P49792, O75694, Q16629, Q8N1F7, P57740, Q7Z3B4, Q9BW27, P38919, O00425, Q96J01, Q12769, Q8WUM0, P52298, Q99567, Q86W42, Q9NZI8, Q9NUU7, P52948, P20592, Q13838, Q07955, P42704, O14980, Q9Y5S9, Q14764, P61326, Q96A72, P35658	1532	106	20581	4.94273	2.10359e-14	8.76495e-16	6.31995e-14		Ribosomal protein
KEGG_PATHWAY	hsa03013:RNA transport	57	3.70852	1.65026e-12	P60228, Q15287, Q09161, Q14240, Q92621, Q8TEM1, P49792, O75694, Q8N1F7, Q9H307, P57740, Q7Z3B4, Q96J01, Q12769, Q9BRP8, Q8WUM0, Q9Y3F4, P52298, Q99567, O75822, O75821, Q8IYB3, Q04637, Q86W42, P41567, Q13347, P11940, Q9UKV3, O15372, O60841, Q9Y5S9, O15371, Q14974, Q96F07, Q8NFH4, Q8NFH5, O00422, O60739, Q7L576, P61956, Q9BW27, P38919, Q92900, P63279, Q14152, P55884, P52948, P63165, Q13838, P06730,…	854	172	6910	2.68143	4.48864e-10	8.97729e-11	2.17224e-09		Importin
														DNA recombination
Annotation Cluster 7	mRNA export													Nucleic acid binding
Category	Term	Count	%	PValue	Genes	List Total	Pop Hits	Pop Total	Fold Enrichment	Bonferroni	Benjamini	FDR		Spectrin
GOTERM_BP_DIRECT	GO:0006406~mRNA export from nucleus	44	2.86272	4.86519e-20	Q15287, P84103, Q09161, O75152, O75494, Q8NFH4, Q8NFH5, Q9BY77, Q6UN15, Q92620, Q92621, Q8TEM1, P49792, O75694, Q16629, Q13243, Q8N1F7, P57740, Q7Z3B4, Q13242, Q9BW27, P38919, Q9P2I0, Q96J01, Q92900, Q12769, Q8WUM0, P52298, P26368, Q99567, Q13247, Q8IYB3, Q9UKF6, Q86W42, Q9NUU7, P52948, Q13838, Q07955, P06730, Q9Y5S9, Q05519, P61326, P35658, Q01130	1475	100	16792	5.00914	1.94948e-16	2.16609e-17	9.04291e-17		GST
GOTERM_BP_DIRECT	GO:0031124~mRNA 3'-end processing	28	1.82173	3.22144e-16	Q15287, P84103, Q09161, O75152, Q9BY77, Q6UN15, Q92620, Q16629, Q8N684, Q13243, Q13242, P38919, Q9P2I0, O43809, Q96J01, P26368, P52298, Q13247, Q8IYB3, Q86W42, Q9UKF6, Q13838, Q07955, Q9Y5S9, Q12996, Q05519, P61326, Q01130	1475	50	16792	6.37527	1.3346e-12	6.06182e-14	6.21725e-13		Nucleotide excision repair
GOTERM_BP_DIRECT	GO:0006369~termination of RNA polymerase II transcription	31	2.01692	1.26471e-15	Q15287, P84103, Q09161, O75152, P62306, P14678, Q9BY77, Q6UN15, Q92620, Q16629, Q8N684, Q13243, Q13242, P38919, Q9P2I0, O43809, Q96J01, P26368, P52298, Q9NP77, Q13247, Q8IYB3, Q86W42, Q9UKF6, Q13838, Q07955, Q9Y5S9, Q12996, Q05519, P61326, Q01130	1475	64	16792	5.51432	4.89353e-12	2.12719e-13	2.26485e-12		Mre11 complex
GOTERM_BP_DIRECT	GO:0006405~RNA export from nucleus	27	1.75667	7.93282e-14	Q15287, P84103, Q09161, O75152, P43487, Q9BY77, Q92620, O75694, Q16629, Q13243, Q13242, P38919, Q96J01, P26368, P52298, Q13247, Q8IYB3, Q86W42, P52948, Q13838, P06730, Q07955, Q9Y5S9, Q05519, P61326, P35658, Q01130	1475	55	16792	5.58871	3.18079e-10	1.09682e-11	1.47549e-10		Dynamin
														Purine biosynthesis
Annotation Cluster 8	Nucleotide binding													Prefoldin
Category	Term	Count	%	PValue	Genes	List Total	Pop Hits	Pop Total	Fold Enrichment	Bonferroni	Benjamini	FDR		Clathrin
UP_KEYWORDS	Nucleotide-binding	261	16.9811	9.45162e-28	P00367, Q9H0A0, O75351, P62070, Q99986, P41240, Q9Y5Y2, Q9NTJ3, P61081, O14983, P00568, Q9BQE3, P26196, P49588, P41252, Q9NSE4, P41250, P54577, P20592, P23921, Q14344, O43776, Q8NI60, P61586, Q9NSD9, Q92930, P62253, O60313, P49591, Q13557, P35998, P40227, P62837, P17252, Q9BY32, Q58FG0, P10644, Q13315, Q05193, P00492, Q58FF8, Q3YEC7, P84095, O95757, P20591, P43405, Q92900, Q9BW83, P62834, P07948,…	1532	1788	20581	1.96101	4.49897e-25	3.21355e-26	1.35166e-24		Catabolic process
UP_KEYWORDS	ATP-binding	193	12.5569	5.67076e-18	P51531, P00367, Q9H0A0, P52701, O75351, Q14289, Q99986, P31153, P41240, O00571, P49915, Q9Y5Y2, P35249, Q9NTJ3, P51532, P17858, P35250, P35251, Q13283, P61081, O14983, Q9UJ70, P00568, P18858, P53396, P51451, Q02880, P26196, P68036, P49588, Q92878, P46459, Q8TDD1, P41252, Q9NSE4, P41250, P54577, Q2TB90, P23921, O43776, Q8NI60, O00762, Q9NSD9, P62253, P53384, P49591, Q13557, P45983, P35998, P40227,…	1532	1391	20581	1.86397	2.69928e-15	1.1736e-16	8.10964e-15		Nop domain
GOTERM_MF_DIRECT	GO:0005524~ATP binding	207	13.4678	1.90484e-11	P00367, Q9H0A0, O75351, Q99986, P41240, Q9Y5Y2, Q9NTJ3, P61081, O14983, P00568, P26196, P49588, P41252, Q9NSE4, P41250, P54577, O43776, P23921, Q8NI60, Q9NSD9, P62253, P49591, Q13557, A6NHR9, P35998, P40227, P62837, P17252, Q58FG0, Q13315, Q58FF8, O95757, P43405, Q92900, P07948, Q8NE71, Q92918, Q9BUQ8, P61088, P27361, P19367, P61086, Q13838, Q9NY93, P07814, P60891, P60604, Q06187, Q9HCC0, Q13523,…	1490	1495	16881	1.5687	2.58297e-08	3.22871e-09	3.12632e-08		LUC7
UP_SEQ_FEATURE	nucleotide phosphate-binding region:ATP	120	7.80742	3.25518e-07	P51531, Q9H0A0, O75351, P52701, Q14289, Q99986, P31153, P41240, O00571, P49915, Q9Y5Y2, P35249, Q9NTJ3, P51532, P17858, P35250, P35251, Q9UJ70, P00568, P53396, P26196, Q02880, P51451, Q92878, P46459, Q8TDD1, P41250, Q2TB90, P53384, P49591, Q13557, P45983, P35998, P11388, P17252, Q7L014, Q9Y2W1, P62195, O95819, Q9H223, P22102, P43405, P17980, P28482, P49736, Q92900, P07948, A0AVT1, Q92918, Q9BUQ8,…	1520	994	20063	1.59348	0.00127392	0.000127465	0.000603539		Dehydrogenase
														DNA polymerase activity
Annotation Cluster 9	Chaperone													Ubiquitin protease
Category	Term	Count	%	PValue	Genes	List Total	Pop Hits	Pop Total	Fold Enrichment	Bonferroni	Benjamini	FDR		Coatomer/clathrin
UP_KEYWORDS	Chaperone	59	3.83865	5.10907e-20	Q15185, P31689, Q13765, Q9UHD1, Q96DA6, Q9UHV9, P50502, Q14568, Q8N5M1, Q16543, Q01105, Q9HAV7, P20290, P78371, Q99471, Q99426, O60884, P04233, Q9H0U6, Q5U5X0, Q9Y5J9, Q9UBS4, Q9NVP2, Q9NQP4, P04792, Q9BS26, P40227, Q9BTT0, Q02790, Q14696, P25685, Q13451, Q58FG0, P61221, Q58FF8, O95757, P46379, O95816, P48643, P50990, O95433, P50991, O43765, Q9H3U1, Q8WXX5, P27824, O60220, O60925, Q12931, Q92688,…	1532	201	20581	3.94333	2.43192e-17	1.21596e-18	7.30638e-17		HMG box
GOTERM_BP_DIRECT	GO:0006457~protein folding	58	3.77358	1.60342e-18	P31689, Q96DA6, P30405, Q9UHV9, Q9H3N1, P49792, P50502, Q13427, P63096, Q5T1M5, Q14568, Q9Y266, Q9HAV0, Q16543, Q9HAV7, P49588, P78371, Q99471, O60884, Q13952, Q9UNP9, P10599, Q9UBS4, Q9NQP4, Q9BS26, P40227, Q02790, P62942, Q14696, P67870, P25685, Q13451, P59768, P68400, Q14165, Q58FG0, P04899, Q58FF8, O95757, Q8WVJ2, P62879, O95816, P48643, P50990, P50991, P26885, Q9Y3C6, P08754, P27824, O60925,…	1475	180	16792	3.66831	6.42489e-15	4.94222e-16	2.98026e-15		snoRNP complex
GOTERM_MF_DIRECT	GO:0051082~unfolded protein binding	32	2.08198	3.3274e-09	Q15185, P40227, P31689, O75494, P25685, Q58FG0, Q9UHV9, Q58FF8, Q8WVJ2, P50502, P48643, P50990, P50991, Q9Y266, Q14568, Q16543, P27824, Q9HAV7, P78371, Q99471, O60925, O60884, O15533, Q12931, P49368, Q9NYU2, P23284, Q99733, P0DMV8, Q9UBS4, Q9NQP4, Q13112	1490	110	16881	3.29586	4.51194e-06	3.22282e-07	5.46109e-06		Cold-shock protein
														RNA polymerase activity
Annotation Cluster 10	Signaling pathways													Translation/elongation factor
Category	Term	Count	%	PValue	Genes	List Total	Pop Hits	Pop Total	Fold Enrichment	Bonferroni	Benjamini	FDR		Zinc finger
GOTERM_BP_DIRECT	GO:0043488~regulation of mRNA stability	53	3.44828	4.21427e-28	P48556, O43242, Q13200, Q13868, Q9Y2L1, Q99460, O00487, Q15717, P28062, P61289, P28065, P28066, Q01105, Q9NQT5, Q92973, Q04637, P28074, P11940, P28072, Q8TAA3, O14818, Q15008, P60900, P04792, P62191, Q9Y3B2, P35998, P25788, P25789, P25786, P17252, P39687, P62195, Q99436, P20618, P62979, P17980, P27695, Q9UL46, Q05655, Q9Y2V2, Q9NPD3, Q9UNM6, P0DMV8, O14980, P62333, Q96B26, P49721, P35658, P49720,…	1475	103	16792	5.858	1.68866e-24	8.44329e-25	7.83304e-25		Aminopeptidase
GOTERM_BP_DIRECT	GO:0050852~T cell receptor signaling pathway	58	3.77358	3.16921e-23	P48556, O43242, Q13200, Q9UJZ1, P20036, P41240, Q99460, Q30134, O00487, P01911, P01912, P27986, P28062, P61289, Q9TQE0, P16885, P28065, P28066, P08575, P04229, P13760, P01909, P28074, P01903, Q92835, P28072, P04440, P01906, O14818, Q8TAA3, Q15008, P60900, P62191, P35998, P25788, P25789, P62837, P25786, Q30154, P62195, Q99436, P20618, P62979, P63208, P28482, P17980, P13761, Q9UL46, P79483, P42768,…	1475	148	16792	4.46146	1.2699e-19	3.17476e-20	5.8906e-20		SAP domain
UP_KEYWORDS	Proteasome	33	2.14704	3.70106e-23	P35998, P48556, P25788, Q13200, O43242, P25789, P25786, Q99460, Q9Y5K5, O00487, P62195, Q99436, P20618, P28062, P61289, P17980, P28065, P28066, Q9UL46, P54578, P54727, P28074, P28072, O14818, Q9UNM6, Q8TAA3, Q15008, P62333, P60900, P49721, P49720, P62191, O00232	1532	53	20581	8.36461	1.7617e-20	1.0363e-21	5.29281e-20		Retromer complex
GOTERM_BP_DIRECT	GO:0038061~NIK/NF-kappaB signaling	37	2.40729	2.30658e-21	P35998, P48556, P25788, Q13200, O43242, P25789, P25786, Q99460, Q99436, P62195, O00487, P20618, P62979, P28062, P61289, Q00653, P61081, P63208, P17980, P28065, P28066, Q9UL46, P19838, P28074, P28072, O14818, Q9UNM6, Q8TAA3, Q15008, P62333, P60900, P49721, P49720, P62191, O00233, O75832, O00232	1475	66	16792	6.38217	9.24247e-18	1.54041e-18	4.28723e-18		Fatty acid metabolism
GOTERM_BP_DIRECT	GO:0002479~antigen processing and presentation of exogenous peptide antigen via MHC class I, TAP-dependent	36	2.34223	3.66132e-21	P35998, P48556, P25788, Q13200, O43242, P25789, P25786, P01892, P30443, Q99460, P62195, O00487, Q99436, P20618, P61769, P28062, P61289, P17980, P28065, P28066, Q9UL46, P18462, P01889, P28074, P04839, P28072, O14818, Q9UNM6, Q8TAA3, Q15008, P62333, P60900, P49721, P30460, P49720, P62191, O00233, O75832, O00232	1475	63	16792	6.50538	1.46709e-17	2.09584e-18	6.80528e-18		Proteasomel protein catabolic process
GOTERM_BP_DIRECT	GO:0006521~regulation of cellular amino acid metabolic process	32	2.08198	1.68421e-20	P35998, P48556, P25788, Q13200, O43242, P25789, P25786, Q99460, O00487, P62195, Q99436, P20618, P28062, P61289, P17980, P28065, P28066, Q9UL46, P28074, P28072, O14818, Q9UNM6, Q8TAA3, Q15008, P62333, P60900, P49721, P49720, P62191, O00233, O75832, O00232	1475	51	16792	7.14316	6.74864e-17	8.4358e-18	3.13044e-17		Ribosome
GOTERM_CC_DIRECT	GO:0000502~proteasome complex	33	2.14704	1.73578e-19	P35998, P48556, P25788, Q13200, O43242, P25789, P25786, Q99460, O00487, P62195, Q99436, P20618, P28062, P61289, P17980, P28065, P28066, Q9UL46, P54578, P54727, P28074, P28072, O14818, Q9UNM6, Q15008, P62333, P60900, P49721, P49720, P62191, P04792, O75832, O00232	1511	60	18224	6.63349	1.42681e-16	1.09755e-17	2.67392e-16		Chromosome maintenance
GOTERM_BP_DIRECT	GO:0002223~stimulatory C-type lectin receptor signaling pathway	44	2.86272	4.63743e-19	P35998, P48556, P25788, Q13200, O43242, P25789, P62837, P25786, Q99460, Q99436, P62195, O00487, P20618, P62979, P61289, P28062, P16885, P63208, P43405, P17980, P17612, P28065, P28066, P07948, Q9UL46, P61088, Q05655, P19838, Q13177, P28074, P28072, O14818, Q8TAA3, Q9UNM6, Q15008, P62333, P60900, P49721, P49720, P62191, O00233, O75832, P01112, O00232	1475	105	16792	4.77061	1.85822e-15	1.68929e-16	8.61957e-16		Enzyme activity
GOTERM_BP_DIRECT	GO:0051437~positive regulation of ubiquitin-protein ligase activity involved in regulation of mitotic cell cycle transition	37	2.40729	1.05684e-18	P35998, P48556, P25788, Q13200, O43242, P25789, P25786, Q99460, P06493, Q99436, P62195, O00487, P20618, P62979, P28062, P61289, P63208, P17980, P28065, P28066, Q9UL46, O43684, P28074, P28072, O14818, Q9UNM6, Q8TAA3, O00762, Q15008, P62333, P60900, P49721, P49720, P62191, O00233, O75832, O00232	1475	76	16792	5.54241	4.23477e-15	3.52898e-16	1.96435e-15		Protein export
GOTERM_BP_DIRECT	GO:0031145~anaphase-promoting complex-dependent catabolic process	37	2.40729	5.17031e-18	P35998, P48556, P25788, Q13200, O43242, P25789, P25786, Q99460, P06493, Q99436, P62195, O00487, P20618, P62979, P28062, P61289, P17980, Q13618, P28065, P28066, Q9UL46, O43684, P28074, P28072, O14818, Q9UNM6, Q8TAA3, O00762, Q15008, P62333, P60900, P49721, P49720, P62191, O00233, O75832, O00232	1475	79	16792	5.33194	2.07174e-14	1.47982e-15	9.61003e-15		Ribosome
GOTERM_BP_DIRECT	GO:0051436~negative regulation of ubiquitin-protein ligase activity involved in mitotic cell cycle	35	2.27716	6.29195e-18	P35998, P48556, P25788, Q13200, O43242, P25789, P25786, Q99460, P06493, Q99436, O00487, P62195, P20618, P62979, P28062, P61289, P17980, P28065, P28066, Q9UL46, O43684, P28074, P28072, O14818, Q9UNM6, O00762, Q15008, P62333, P60900, P49721, P49720, P62191, O00233, O75832, O00232	1475	71	16792	5.61203	2.52119e-14	1.68079e-15	1.16948e-14		CID domain
KEGG_PATHWAY	hsa03050:Proteasome	30	1.95185	9.97488e-17	P35998, P48556, P25788, Q13200, O43242, P25789, P25786, Q99460, O00487, P62195, Q99436, P20618, P28062, P61289, P17980, P28065, P28066, Q9UL46, P28074, P28072, Q9UNM6, Q8TAA3, O14818, Q15008, P62333, P60900, P49721, P62191, P49720, O00232	854	44	6910	5.51682	3.01981e-14	1.5099e-14	1.44329e-13		Metabolism
GOTERM_BP_DIRECT	GO:0060071~Wnt signaling pathway, planar cell polarity pathway	37	2.40729	2.22881e-15	P35998, P48556, P25788, Q13200, O43242, P25789, P25786, P60953, Q99460, Q99436, O00487, P62195, P20618, P62979, P28062, P61289, P17980, Q00610, P28065, P28066, Q9UL46, P63000, P28074, P28072, O14818, Q9UNM6, Q8TAA3, P61586, Q15008, P62333, P60900, P49721, P49720, P62191, O00233, O75832, O00232	1475	92	16792	4.57851	8.89733e-12	3.70703e-13	4.13003e-12		COMM domain
GOTERM_BP_DIRECT	GO:0038095~Fc-epsilon receptor signaling pathway	53	3.44828	2.70201e-15	P48556, O43242, Q13200, P01614, Q08209, Q99460, Q06187, O00487, P27986, P28062, P61289, P16885, P28065, P63098, P28066, P63000, P28074, P28072, Q8TAA3, O14818, Q15008, P60900, P62191, P45983, P35998, P25788, P25789, P62837, P25786, P62158, P62195, Q99436, P20618, P62979, P63208, P43405, P17980, P28482, P07948, Q9UL46, P61088, P27361, P19838, Q13177, Q9UNM6, P62333, P49721, P49720, O75832, O00233,…	1475	178	16792	3.38974	1.06768e-11	4.27103e-13	4.95159e-12		Ubiquitin
UP_KEYWORDS	Threonine protease	15	0.975927	3.8003e-12	P25788, P25789, P25786, Q99436, P28074, P20618, P28072, P28062, Q8TAA3, O14818, P60900, P28065, P49721, P49720, P28066	1532	20	20581	10.0756	1.80894e-09	6.4605e-11	5.43472e-09		HAT
INTERPRO	IPR001353:Proteasome, subunit alpha/beta	15	0.975927	3.88942e-12	P25788, P25789, P25786, Q99436, P28074, P20618, P28072, P28062, Q8TAA3, O14818, P60900, P28065, P49721, P49720, P28066	1504	19	18559	9.74192	9.14797e-09	2.28699e-09	6.81376e-09		Ligase complex
PFAM	PF00227:Proteasome subunit	15	0.975927	5.05538e-12	P25788, P25789, P25786, Q99436, P28074, P20618, P28072, P28062, Q8TAA3, O14818, P60900, P28065, P49721, P49720, P28066	1444	19	17475	9.55405	6.32936e-09	3.16468e-09	8.21604e-09		VCB complex
GOTERM_BP_DIRECT	GO:0033209~tumor necrosis factor-mediated signaling pathway	37	2.40729	1.2935e-11	P35998, P48556, P25788, Q13200, O43242, P25789, P42224, P25786, Q14289, Q9ULZ3, Q99460, Q99436, P62195, O00487, P20618, P62979, P28062, P61289, P17980, P28065, P28066, Q9UL46, Q9BRA2, P28074, P28072, O14818, Q9UNM6, Q8TAA3, Q15008, P62333, P60900, P49721, P49720, P62191, O00233, O75832, O00232	1475	118	16792	3.56969	5.18305e-08	1.6197e-09	2.40422e-08		Catalytic activity
GOTERM_BP_DIRECT	GO:0090263~positive regulation of canonical Wnt signaling pathway	37	2.40729	2.22618e-11	P35998, P48556, Q96QK1, P25788, Q13200, O43242, P25789, P25786, Q99460, Q8N163, Q99436, O00487, P62195, P20618, P62979, P28062, P61289, Q13526, P17980, P28065, P28066, Q9UL46, P19838, P28074, P28072, O14818, Q9UNM6, Q8TAA3, Q15008, P62333, P60900, P49721, P49720, P62191, O00233, O75832, O00232	1475	120	16792	3.51019	8.92033e-08	2.62363e-09	4.1378e-08		GTPase superfamily
GOTERM_CC_DIRECT	GO:0005839~proteasome core complex	15	0.975927	4.52704e-11	P25788, P25789, P25786, Q99436, P28074, P20618, P28072, P28062, Q8TAA3, O14818, P60900, P28065, P49721, P49720, P28066	1511	21	18224	8.61492	3.72123e-08	1.61793e-09	6.9738e-08		NADP
GOTERM_BP_DIRECT	GO:0000209~protein polyubiquitination	47	3.05791	4.52996e-11	P35998, P48556, P25788, Q13200, O43242, P25789, P62837, P25786, Q13867, Q99460, Q14669, Q99436, P62195, O00487, Q15819, P20618, P62979, P49459, P61289, P28062, P55786, P63208, Q14139, P62877, P17980, Q13618, P28065, P28066, Q9UL46, P68036, P29144, Q13951, P28074, P28072, O14818, Q8TAA3, Q9UNM6, Q15008, P62333, P60900, P49721, P49720, P62191, O00233, O75832, Q9UIQ6, O00232	1475	184	16792	2.90797	1.81515e-07	5.04209e-09	8.41981e-08		Magnesium
GOTERM_MF_DIRECT	GO:0004298~threonine-type endopeptidase activity	15	0.975927	1.04621e-10	P25788, P25789, P25786, Q99436, P28074, P20618, P28072, P28062, Q8TAA3, O14818, P60900, P28065, P49721, P49720, P28066	1490	21	16881	8.09252	1.41866e-07	1.41866e-08	1.71709e-07		Protein transport
GOTERM_BP_DIRECT	GO:0043161~proteasome-mediated ubiquitin-dependent protein catabolic process	49	3.18803	1.3977e-10	Q16531, P48556, O43242, Q13200, Q8WW12, Q99460, O00487, Q9UNZ2, P28062, P61289, P49459, Q13618, P28065, P28066, P54727, P28074, P28072, Q8TAA3, O14818, O00762, Q15008, P60900, Q15366, P62191, P35998, P25788, P25789, P25786, P06493, Q9Y5K6, P62195, Q99436, P20618, P62979, P63208, P62877, P17980, Q9UL46, O43684, Q13330, P61086, Q9UNM6, P62333, P49721, P49720, O75832, O00233, O00232, P29590	1475	203	16792	2.74796	5.60057e-07	1.43604e-08	2.59789e-07		Arp2/3 complex
GOTERM_CC_DIRECT	GO:0022624~proteasome accessory complex	13	0.845804	4.19549e-10	P48556, P35998, Q13200, O43242, Q9UNM6, P17980, Q15008, P62333, Q99460, P62191, O00232, O00487, P62195	1511	17	18224	9.22303	3.44869e-07	1.23168e-08	6.46305e-07		Phosphorylation
GOTERM_BP_DIRECT	GO:0090090~negative regulation of canonical Wnt signaling pathway	39	2.53741	1.72834e-08	P35998, P48556, P25788, Q13200, O43242, P25789, Q13043, P25786, Q99460, Q99436, P62195, O00487, P20618, Q13547, P62979, P28062, P61289, Q13283, P62877, P17980, Q13618, P28065, P28066, Q9UL46, Q99471, P28074, P28072, O14818, Q8TAA3, Q9UNM6, Q15008, P62333, P60900, P49721, P49720, P62191, O00233, O75832, O00232	1475	163	16792	2.72388	6.92521e-05	1.53899e-06	3.21246e-05		Apoptotic process
GOTERM_BP_DIRECT	GO:0051603~proteolysis involved in cellular protein catabolic process	19	1.23617	4.89001e-08	P25788, Q9HB40, P25789, P25786, Q16740, P36776, P14735, Q99436, P20618, P28074, P28072, P28062, O14818, Q8TAA3, P60900, P28065, P49721, P49720, P25774	1475	48	16792	4.50633	0.000195924	3.76812e-06	9.08904e-05		Regulation
GOTERM_BP_DIRECT	GO:0000165~MAPK cascade	51	3.31815	1.17337e-07	P48556, O43242, Q13200, Q01082, Q14289, Q99460, O00487, P28062, P61289, Q02080, Q13618, P28065, P28066, P11277, Q86YV0, Q9UHA4, Q13813, P28074, P28072, Q8TAA3, O14818, Q15008, P60900, P62191, Q13557, P02549, P35998, P25788, P25789, P25786, P30086, Q15121, P62158, P62195, Q99436, P20618, P62979, P62877, P17980, P28482, Q9UL46, Q9Y2Q5, P27361, Q9UNM6, P62333, P49721, P49720, O75832, O00233, O00232,…	1475	262	16792	2.21605	0.000470059	8.87108e-06	0.000218094		Pore complex
INTERPRO	IPR016050:Proteasome, beta-type subunit, conserved site	9	0.585556	6.69043e-07	P20618, P28074, P28072, P25789, P28062, P28065, P49721, P49720, Q99436	1504	12	18559	9.25482	0.00157235	0.000131124	0.00117206		Dynein
INTERPRO	IPR023333:Proteasome B-type subunit	8	0.520494	5.55749e-06	P20618, P28074, P28072, P28062, P28065, P49721, P49720, Q99436	1504	11	18559	8.97437	0.0129862	0.00081662	0.0097355		Transferase activity
INTERPRO	IPR000426:Proteasome, alpha-subunit, N-terminal domain	7	0.455433	6.78256e-06	P25788, P25789, P25786, Q8TAA3, O14818, P60900, P28066	1504	8	18559	10.7973	0.0158261	0.00093795	0.0118814		Mitochondrion
INTERPRO	IPR023332:Proteasome A-type subunit	7	0.455433	6.78256e-06	P25788, P25789, P25786, Q8TAA3, O14818, P60900, P28066	1504	8	18559	10.7973	0.0158261	0.00093795	0.0118814		Redox-active center
PFAM	PF10584:Proteasome subunit A N-terminal signature	7	0.455433	7.59708e-06	P25788, P25789, P25786, Q8TAA3, O14818, P60900, P28066	1444	8	17475	10.5891	0.00946649	0.00158401	0.0123461		Coil
GOTERM_CC_DIRECT	GO:0019773~proteasome core complex, alpha-subunit complex	7	0.455433	7.75355e-06	P25788, P25789, P25786, Q8TAA3, O14818, P60900, P28066	1511	8	18224	10.5533	0.00635317	0.000127461	0.0119435		Chaperone
INTERPRO	IPR000243:Peptidase T1A, proteasome beta-subunit	5	0.325309	0.00122828	P28074, P28072, P28062, P28065, Q99436	1504	7	18559	8.81411	0.944463	0.0732496	2.13009		NuRD complex
														PUA
Annotation Cluster 11	Ribosomal protein													Cell cycle
Category	Term	Count	%	PValue	Genes	List Total	Pop Hits	Pop Total	Fold Enrichment	Bonferroni	Benjamini	FDR		SANT/Myb domain
UP_KEYWORDS	Ribosomal protein	65	4.22902	8.55843e-27	Q9H2W6, Q71UM5, Q07020, P62277, P61353, P18621, P62269, P62857, P62266, P61247, P52815, Q6P1L8, P61313, P23396, P62854, P62851, Q8IXM3, P15880, Q86WX3, Q6NVV1, Q16540, Q6P5R6, Q9P015, Q96GC5, P83881, Q9H0U6, Q9NWU5, P62917, Q02878, Q9Y3B7, P82932, O60783, Q9BYN8, P39023, Q9Y2R9, P35268, P63173, P62979, Q9BYD6, P82663, P82664, Q9Y676, P84098, P62906, P62244, Q8N983, P82921, P46781, Q13405, P46783,…	1532	185	20581	4.72008	4.07381e-24	2.71588e-25	1.22392e-23		Matrin
GOTERM_BP_DIRECT	GO:0070125~mitochondrial translational elongation	30	1.95185	6.12758e-11	Q9H2W6, Q9Y2R9, Q96EY7, Q9BYD6, P82663, Q9Y676, P82664, P43897, P52815, Q6P1L8, P82921, Q8N983, Q13405, Q14197, Q8IXM3, Q16540, Q9Y2Q9, Q96RP9, Q9P015, Q96GC5, Q9H9J2, Q9H0U6, Q92552, Q9NWU5, Q9Y3B7, P82650, P82932, Q9Y3D9, O60783, Q9BYN8	1475	85	16792	4.01803	2.45532e-07	6.46138e-09	1.13893e-07		Interferon
GOTERM_BP_DIRECT	GO:0070126~mitochondrial translational termination	28	1.82173	2.29292e-09	Q9H2W6, Q9Y2R9, Q96EY7, Q9BYD6, P82663, Q9Y676, P82664, P52815, Q6P1L8, P82921, Q8N983, Q13405, Q14197, Q8IXM3, Q16540, Q9Y2Q9, Q9P015, Q96GC5, Q9H9J2, Q9H0U6, Q9NWU5, Q92552, Q9Y3B7, P82650, P82932, Q9Y3D9, O60783, Q9BYN8	1475	86	16792	3.70655	9.18768e-06	2.13668e-07	4.26183e-06		Reactive oxygen species
GOTERM_CC_DIRECT	GO:0005762~mitochondrial large ribosomal subunit	12	0.780742	0.00156609	Q9H2W6, Q9H0U6, Q9NWU5, Q16540, Q9Y3B7, Q9P015, P52815, Q6P1L8, Q8N983, Q13405, Q14197, Q8IXM3	1511	48	18224	3.01522	0.724271	0.0136122	2.3855		SH3 binding
														Fatty acid elongation
Annotation Cluster 12	Mitochondrion													GST
Category	Term	Count	%	PValue	Genes	List Total	Pop Hits	Pop Total	Fold Enrichment	Bonferroni	Benjamini	FDR		COMPASS complex
UP_KEYWORDS	Mitochondrion inner membrane	71	4.61939	5.73294e-21	P49748, O14949, O75964, Q9UJZ1, Q3ZCQ8, Q96DA6, O00483, Q9UDW1, O95831, O95168, P50440, Q9Y6M9, P36542, P23396, Q13423, P19404, P08574, Q9BU61, Q9P0J0, P00156, P51970, Q9NX63, Q6NUK1, P13073, P24539, P10606, Q00325, Q9Y5J9, P28331, P00846, O60313, Q9BUP0, O43674, Q9NVI7, O43676, P53007, O96000, P56134, Q9Y6C9, P09669, O95202, Q5SRD1, P31040, Q99766, P23786, P30049, Q5TGZ0, P00403, O75380, O43920,…	1532	270	20581	3.53266	2.72888e-18	1.51604e-19	8.19856e-18		Fatty acid degradation
UP_KEYWORDS	Respiratory chain	29	1.88679	9.93923e-16	O43674, O43676, O14949, O96000, O00483, Q9UDW1, O95168, P00403, Q9Y6M9, O75380, Q16795, O43920, P19404, P49821, P08574, O75489, Q9P0J0, P14927, P00156, P51970, P56556, P99999, O95299, Q9UI09, P07919, P28331, Q16718, O75251, O75306	1532	63	20581	6.18394	4.7562e-13	1.89848e-14	1.43219e-12		Tetratricopeptide repeat
UP_KEYWORDS	Electron transport	37	2.40729	4.80823e-15	O43674, O43676, O14949, O96000, P00167, O00483, Q9UDW1, P31040, O95168, Q9H3N1, P00403, Q9Y6M9, O75380, Q16795, O43920, P19404, P49821, O75489, P08574, Q9P0J0, P21912, P14927, P51970, P00156, P56556, P99999, P04839, Q9UI09, O95299, P38117, O43169, P10599, P28331, P07919, Q16718, O75251, O75306	1532	108	20581	4.60241	2.2724e-12	8.73746e-14	6.82787e-12		Chromo shadow domain
KEGG_PATHWAY	hsa05012:Parkinson's disease	53	3.44828	5.31524e-14	O14949, P60604, P30405, O00483, Q9UDW1, O95168, P17612, Q9Y6M9, P36542, P63096, P19404, P68036, P08574, Q9P0J0, P00156, P51970, P13073, P24539, P10606, O95299, P00846, P28331, P62253, Q9Y277, O43674, O43676, O96000, P45880, P09669, P04899, P31040, P30049, P00403, Q16795, O75380, O43920, P08754, P14406, P49821, O75489, P21912, P14927, O14933, P56556, P12235, P99999, Q9UI09, P48047, P07919, Q16718,…	854	142	6910	3.02001	1.44649e-11	4.82159e-12	6.99996e-11		Vesicle transport
KEGG_PATHWAY	hsa05016:Huntington's disease	63	4.09889	1.52565e-13	O14949, P30405, O00483, Q9UDW1, P36954, O95168, Q9Y6M9, P36542, P19404, P52434, P52435, P08574, Q9P0J0, Q13561, Q00059, P00156, P51970, P19388, P19387, P24928, P13073, P24539, P10606, O95299, Q07812, P04179, P28331, P00846, Q9Y277, O43674, O43676, O96000, P00441, P45880, P09669, Q14643, P62487, Q13547, P31040, P30049, Q00610, P00403, O75380, Q16795, O43920, P14406, P49821, O75489, P14927, P21912,…	854	192	6910	2.65497	4.14921e-11	1.0373e-11	2.00795e-10		COPI
GOTERM_BP_DIRECT	GO:0006120~mitochondrial electron transport, NADH to ubiquinone	23	1.49642	2.38034e-11	P19404, O43674, O43676, P49821, O75489, Q9P0J0, O96000, P51970, O00483, P56556, P09622, O95168, O95299, Q9UI09, P28331, Q16718, Q9Y6M9, O75251, O75380, Q16795, O43920, O75306, O75208	1475	49	16792	5.3437	9.53802e-08	2.72515e-09	4.42433e-08		SH2 domain
KEGG_PATHWAY	hsa05010:Alzheimer's disease	54	3.51334	2.61369e-11	O14949, Q99714, Q08209, O00483, Q9UDW1, O95168, O14983, Q13564, Q9Y6M9, P36542, P63098, P19404, P08574, Q9P0J0, P00156, P51970, P14735, P13073, P24539, P10606, O95299, P00846, P28331, P55957, O43674, O43676, O96000, P09669, Q14643, P62158, P31040, P28482, P30049, P00403, Q16795, O75380, O43920, P14406, P49821, O75489, P21912, P14927, P27361, P07384, P56556, Q93084, P99999, Q9UI09, P48047, P07919,…	854	168	6910	2.60079	7.10926e-09	1.18488e-09	3.44047e-08
KEGG_PATHWAY	hsa00190:Oxidative phosphorylation	46	2.99284	6.33722e-11	O43674, Q9H2U2, O43676, O14949, O75964, O96000, P56134, P09669, O00483, Q15181, Q9UDW1, P31040, O95168, P30049, Q9Y6M9, P00403, P36542, O75380, Q16795, O43920, P19404, P14406, P49821, O75348, O75489, P08574, Q9P0J0, P21912, P14927, P51970, P00156, P56556, P21281, P13073, P24539, P10606, Q9UI09, O95299, P61421, P48047, P28331, P07919, P00846, Q16718, O75251, O75306	854	133	6910	2.79851	1.72372e-08	2.15465e-09	8.34182e-08
GOTERM_CC_DIRECT	GO:0005747~mitochondrial respiratory chain complex I	21	1.3663	5.59606e-10	P19404, O43674, O43676, P49821, O75489, Q9P0J0, O96000, P51970, O00483, P56556, O95168, O95299, Q9UI09, P28331, Q16718, Q9Y6M9, O75251, O75380, Q16795, O43920, O75306	1511	49	18224	5.16895	4.59996e-07	1.58619e-08	8.62059e-07
UP_KEYWORDS	Ubiquinone	17	1.10605	8.49861e-10	P19404, O43674, O43676, P49821, O75489, Q9P0J0, O96000, P00156, P51970, O00483, O95299, P28331, Q16718, O75251, O75380, O75306, O43920	1532	35	20581	6.52512	4.04534e-07	1.18981e-08	1.21537e-06
GOTERM_MF_DIRECT	GO:0008137~NADH dehydrogenase (ubiquinone) activity	21	1.3663	1.07624e-09	P19404, O43674, O43676, P49821, O75489, Q9P0J0, O96000, P51970, O00483, P56556, O95168, O95299, Q9UI09, P28331, Q16718, Q9Y6M9, O75251, O75380, Q16795, O43920, O75306	1490	48	16881	4.95667	1.45938e-06	1.1226e-07	1.76637e-06
GOTERM_BP_DIRECT	GO:0032981~mitochondrial respiratory chain complex I assembly	22	1.43136	4.22995e-08	P19404, O43674, O43676, P49821, Q9BU61, O75489, Q9P0J0, O96000, P51970, P56556, O95831, O95168, O95299, Q9UI09, P28331, Q16718, Q9Y6M9, O75251, O75380, Q16795, O43920, O75306	1475	63	16792	3.97551	0.00016948	3.32341e-06	7.86219e-05
KEGG_PATHWAY	hsa04932:Non-alcoholic fatty liver disease (NAFLD)	44	2.86272	6.19459e-08	O43674, O43676, O14949, P60953, O96000, P09669, O00483, Q9UDW1, P31040, P27986, O95168, Q9Y6M9, P00403, O75380, Q16795, O43920, P19404, P14406, P49821, O75489, P08574, Q9P0J0, P21912, P14927, P51970, P00156, P19838, P56556, P63000, P99999, P13073, P10606, Q9UI09, O95299, Q07812, P28331, P07919, Q16718, P42574, P05198, P55957, O75251, O75306, P45983	854	151	6910	2.35774	1.68491e-05	1.2961e-06	8.15406e-05
OMIM_DISEASE	252010~Mitochondrial complex I deficiency	9	0.585556	1.30003e-05	P19404, O43676, P49821, Q9BU61, O75489, P28331, Q9Y6M9, O75380, O75306	359	17	4740	6.99	0.00700855	0.00700855	0.0189267
Annotation Cluster 13	Eukaryotic complex
Category	Term	Count	%	PValue	Genes	List Total	Pop Hits	Pop Total	Fold Enrichment	Bonferroni	Benjamini	FDR
UP_KEYWORDS	Initiation factor	27	1.75667	8.04175e-15	P60228, Q7L2H7, O75822, O75821, Q14152, Q04637, P41214, Q14240, P55884, P41567, Q9Y262, P06730, P47813, Q15056, Q13347, Q9ULC4, O60739, O60841, O15372, O15371, Q2VIR3, P05198, Q9UBQ5, Q99613, O43583, P56537, P41091	1532	58	20581	6.25379	3.80496e-12	1.40887e-13	1.14353e-11
GOTERM_BP_DIRECT	GO:0001731~formation of translation preinitiation complex	18	1.17111	6.05427e-14	P60228, Q7L2H7, O75822, O75821, Q14152, P41214, P55884, Q9Y262, Q15056, Q13347, Q9ULC4, O15372, O15371, Q2VIR3, Q9UBQ5, Q99613, O43583, P41091	1475	23	16792	8.90954	2.42452e-10	8.65896e-12	1.12466e-10
GOTERM_BP_DIRECT	GO:0006446~regulation of translational initiation	22	1.43136	8.67682e-14	P60228, Q09161, Q7L2H7, P52298, O75822, O75821, Q04637, Q14152, Q14240, P55884, P41567, Q9Y262, Q15056, Q13347, Q92499, O60739, O60841, O15372, O15371, Q9UBQ5, Q99613, P04792	1475	36	16792	6.95714	3.47885e-10	1.15962e-11	1.61371e-10
GOTERM_MF_DIRECT	GO:0003743~translation initiation factor activity	27	1.75667	1.80576e-12	P60228, Q7L2H7, O75822, O75821, Q14152, Q04637, P41214, Q14240, P55884, P41567, Q9Y262, P06730, P47813, Q15056, Q13347, Q9ULC4, O60739, O60841, O15372, O15371, Q2VIR3, P05198, Q9UBQ5, Q99613, O43583, P56537, P41091	1490	61	16881	5.01471	2.44863e-09	3.49805e-10	2.96373e-09
GOTERM_CC_DIRECT	GO:0005852~eukaryotic translation initiation factor 3 complex	14	0.910865	1.43356e-11	P60228, Q7L2H7, O75822, O75821, O00571, Q14152, P55884, Q9Y262, P61221, Q13347, O15372, O15371, Q9UBQ5, Q99613	1511	17	18224	9.9325	1.17839e-08	5.89195e-10	2.20837e-08
GOTERM_CC_DIRECT	GO:0033290~eukaryotic 48S preinitiation complex	13	0.845804	3.61177e-11	P60228, Q13347, Q7L2H7, O15372, O75822, O75821, O15371, Q14152, P05198, Q9UBQ5, Q99613, P55884, Q9Y262	1511	15	18224	10.4528	2.96887e-08	1.34949e-09	5.56383e-08
GOTERM_CC_DIRECT	GO:0016282~eukaryotic 43S preinitiation complex	12	0.780742	1.21926e-09	P60228, Q13347, Q7L2H7, O15372, O75822, O75821, O15371, Q14152, Q9UBQ5, Q99613, P55884, Q9Y262	1511	15	18224	9.64871	1.00223e-06	3.34077e-08	1.87824e-06
GOTERM_CC_DIRECT	GO:0071541~eukaryotic translation initiation factor 3 complex, eIF3m	6	0.390371	7.06905e-05	Q13347, Q7L2H7, O15372, O15371, Q14152, P55884	1511	7	18224	10.3379	0.0564535	0.000921951	0.108842
GOTERM_BP_DIRECT	GO:0075525~viral translational termination-reinitiation	5	0.325309	0.00027504	O75821, O15371, Q14152, P55884, Q9Y262	1475	5	16792	11.3844	0.667873	0.0111843	0.509981
GOTERM_BP_DIRECT	GO:0075522~IRES-dependent viral translational initiation	5	0.325309	0.00166616	P05455, O15371, Q14152, Q15366, P55884	1475	7	16792	8.13172	0.998747	0.0537252	3.05193
Annotation Cluster 14	Proteasome
Category	Term	Count	%	PValue	Genes	List Total	Pop Hits	Pop Total	Fold Enrichment	Bonferroni	Benjamini	FDR
UP_SEQ_FEATURE	domain:PCI	14	0.910865	4.50491e-11	P60228, O43242, Q7L2H7, Q14152, Q9BT78, Q96HY6, Q99627, Q9UNM6, Q9UNS2, Q13098, Q15008, Q99613, Q9H9Q2, O00232	1520	19	20063	9.72583	1.76412e-07	5.88041e-08	8.35251e-08
INTERPRO	IPR000717:Proteasome component (PCI) domain	12	0.780742	7.43123e-09	P60228, O43242, Q7L2H7, Q9UNM6, Q9UNS2, Q13098, Q15008, Q14152, Q99613, Q9BT78, Q9H9Q2, O00232	1504	17	18559	8.71042	1.74781e-05	2.91304e-06	1.30185e-05
PFAM	PF01399:PCI domain	12	0.780742	9.10668e-09	P60228, O43242, Q7L2H7, Q9UNM6, Q9UNS2, Q13098, Q15008, Q14152, Q99613, Q9BT78, Q9H9Q2, O00232	1444	17	17475	8.54245	1.14015e-05	3.80051e-06	1.48002e-05
Annotation Cluster 15	Nuclear proteins
Category	Term	Count	%	PValue	Genes	List Total	Pop Hits	Pop Total	Fold Enrichment	Bonferroni	Benjamini	FDR
UP_KEYWORDS	mRNA transport	39	2.53741	4.4193e-17	P84103, Q09161, O75152, Q9UIA9, Q8NFH4, Q8NFH5, Q9BY77, Q92621, Q32P51, P61970, Q8TEM1, P49792, O75694, Q16629, Q8N1F7, P57740, Q7Z3B4, Q9BW27, P38919, O00425, Q96J01, Q12769, Q8WUM0, P52298, Q99567, Q86W42, Q9NZI8, Q9NUU7, P52948, P20592, Q13838, Q07955, P42704, O14980, Q9Y5S9, Q14764, P61326, Q96A72, P35658	1532	106	20581	4.94273	2.10359e-14	8.76495e-16	6.31995e-14
GOTERM_BP_DIRECT	GO:1900034~regulation of cellular response to heat	32	2.08198	3.25126e-14	Q15185, Q9UHD1, Q02790, P35244, P25685, Q8N163, Q8NFH4, Q8NFH5, Q13315, Q92621, Q8TEM1, P49792, O75694, O95816, P28482, Q8N1F7, P57740, Q7Z3B4, Q9BW27, P27694, Q12769, Q8WUM0, Q99567, P27361, P52948, P15927, Q53FT3, Q99615, P0DMV8, P35658, Q13557, Q92598	1475	75	16792	4.85735	1.30346e-10	4.82758e-12	6.04627e-11
UP_KEYWORDS	Translocation	27	1.75667	1.90111e-10	Q9NS69, Q9UIA9, Q3ZCQ8, Q96DA6, Q8NFH4, Q8NFH5, Q5SRD1, Q92621, Q8TEM1, P61970, P49792, O75694, Q8N1F7, P57740, Q7Z3B4, Q9BW27, Q12769, Q8WUM0, O60220, Q99567, P52948, P20592, Q9NUU7, P60468, Q9Y5J9, Q14764, P35658	1532	84	20581	4.31809	9.04929e-08	2.74221e-09	2.71874e-07
UP_KEYWORDS	Nuclear pore complex	20	1.30124	1.05663e-09	Q12769, Q8WUM0, Q99567, Q9UIA9, Q8NFH4, Q8NFH5, P52948, Q9NUU7, P20592, Q92621, Q8TEM1, P61970, P49792, O75694, Q8N1F7, P57740, Q7Z3B4, Q14764, Q9BW27, P35658	1532	50	20581	5.37363	5.02956e-07	1.3971e-08	1.51106e-06
GOTERM_BP_DIRECT	GO:0007077~mitotic nuclear envelope disassembly	20	1.30124	1.24613e-09	Q12769, Q8WUM0, Q99567, P17252, Q99986, Q8NFH4, P05771, P06493, Q8NFH5, P52948, Q92621, Q8TEM1, P49792, O75694, Q8N1F7, P57740, Q7Z3B4, Q9BW27, P50402, P35658	1475	44	16792	5.17473	4.99324e-06	1.21787e-07	2.31618e-06
GOTERM_BP_DIRECT	GO:0016925~protein sumoylation	32	2.08198	1.48931e-08	P11388, P11387, Q8NFH4, Q8NFH5, P41208, Q92621, Q8TEM1, P49792, O75694, P61956, Q8N1F7, P57740, Q7Z3B4, P23497, Q9BW27, P63279, Q96MF7, Q9UBT2, P27694, Q12769, Q02880, Q8WUM0, Q99567, Q9Y2X3, Q13330, Q9UBE0, P52948, P63165, O15392, O60216, P35658, P29590	1475	117	16792	3.11368	5.9675e-05	1.35629e-06	2.76818e-05
GOTERM_BP_DIRECT	GO:0075733~intracellular transport of virus	20	1.30124	2.35571e-08	Q12769, Q8WUM0, Q14974, Q99567, Q8NFH4, Q9H9H4, Q8NFH5, P52948, O00505, P62979, Q92621, Q8TEM1, P49792, O14980, O75694, Q8N1F7, P57740, Q7Z3B4, Q9BW27, P35658	1475	51	16792	4.46447	9.43887e-05	1.92639e-06	4.37854e-05
GOTERM_BP_DIRECT	GO:0006409~tRNA export from nucleus	15	0.975927	1.57167e-07	Q12769, Q8WUM0, Q99567, Q8NFH4, Q8NFH5, P52948, Q92621, Q8TEM1, P49792, O75694, Q8N1F7, P57740, Q7Z3B4, Q9BW27, P35658	1475	32	16792	5.33644	0.000629571	1.16623e-05	0.000292126
GOTERM_BP_DIRECT	GO:0031047~gene silencing by RNA	29	1.88679	2.25896e-07	Q09161, Q8NFH4, Q8NFH5, P62487, P36954, Q92621, Q8TEM1, P49792, O75694, Q8N1F7, Q92600, P57740, Q99598, Q7Z3B4, Q9BW27, Q12769, Q15631, P52434, P52435, Q8WUM0, P52298, Q99567, P52948, P19388, P24928, P19387, P11940, P53803, P35658	1475	111	16792	2.9743	0.000904756	1.61635e-05	0.000419871
GOTERM_BP_DIRECT	GO:0010827~regulation of glucose transport	15	0.975927	2.50954e-07	Q12769, Q8WUM0, Q99567, Q8NFH4, Q8NFH5, P52948, Q92621, Q8TEM1, P49792, O75694, Q8N1F7, P57740, Q7Z3B4, Q9BW27, P35658	1475	33	16792	5.17473	0.00100507	1.76415e-05	0.000466446
GOTERM_CC_DIRECT	GO:0005643~nuclear pore	19	1.23617	1.67071e-05	Q12769, Q8WUM0, Q14974, Q9Y6D9, Q99567, Q9UIA9, P52948, Q9NUU7, P20592, O00505, P63165, Q92621, Q8TEM1, P49792, O75694, Q8N1F7, P57740, Q14764, O00410	1511	72	18224	3.18273	0.0136395	0.000254289	0.0257337
GOTERM_MF_DIRECT	GO:0017056~structural constituent of nuclear pore	9	0.585556	0.000256724	Q92621, Q8WUM0, O75694, Q8N1F7, P57740, Q7Z3B4, Q9BW27, P35658, P52948	1490	21	16881	4.85551	0.294016	0.00962457	0.420515
GOTERM_CC_DIRECT	GO:0031080~nuclear pore outer ring	6	0.390371	0.000685843	Q12769, Q8WUM0, P57740, Q8NFH4, Q9BW27, P52948	1511	10	18224	7.23653	0.431046	0.0063881	1.05132
GOTERM_BP_DIRECT	GO:0006606~protein import into nucleus	14	0.910865	0.00129534	Q8WUM0, Q14974, Q99567, Q08209, P43487, O00505, Q53FT3, P61970, O75694, Q8N1F7, P57740, Q9BW27, P35658, P40763	1475	58	16792	2.74796	0.994449	0.0437864	2.38041
GOTERM_MF_DIRECT	GO:0005487~nucleocytoplasmic transporter activity	8	0.520494	0.0021328	Q12769, Q8WUM0, Q9NW64, O14980, P57740, Q7Z3B4, Q8NFH5, P52948	1490	22	16881	4.11983	0.94471	0.051278	3.44351
Annotation Cluster 16	Golgi
Category	Term	Count	%	PValue	Genes	List Total	Pop Hits	Pop Total	Fold Enrichment	Bonferroni	Benjamini	FDR
UP_KEYWORDS	ER-Golgi transport	25	1.62655	6.27257e-08	P62820, P35606, P53621, P18085, Q9Y678, P51572, P53992, Q13618, P20340, P84077, O14579, Q9NR31, Q86SZ2, P49755, P61019, O60763, Q9UBF2, P61923, Q8WVM8, Q15363, P48444, P62330, P84085, P54920, P53618	1532	94	20581	3.57289	2.9857e-05	7.10891e-07	8.97026e-05
GOTERM_BP_DIRECT	GO:0006888~ER to Golgi vesicle-mediated transport	36	2.34223	3.29971e-07	P62820, Q01082, Q9BVK6, P35606, P16157, Q9UEU0, P53621, P18085, Q13409, Q9Y678, P53992, O75935, P51572, Q13618, O14579, Q9P0L0, Q86SZ2, P46459, Q13561, P49755, P63167, Q9H0U4, P11277, P61019, Q13813, O60763, Q9UBF2, Q14204, Q14203, P61923, Q15363, P48444, Q9BTE1, P02549, P54920, P53618	1475	160	16792	2.56149	0.00132132	2.16751e-05	0.000613313
GOTERM_BP_DIRECT	GO:0006890~retrograde vesicle-mediated transport, Golgi to ER	24	1.56148	3.48721e-07	P62820, P46459, Q9BVK6, P48739, P49755, P35606, Q12840, Q9H0U4, O15533, P53621, P18085, Q9UBF2, Q9Y678, Q8WVM8, P61923, Q15363, P48444, O00139, P20340, P84085, Q9H4A6, P54920, P53618, O14579	1475	82	16792	3.33202	0.00139635	2.25373e-05	0.000648165
Annotation Cluster 17	GTP-binding
Category	Term	Count	%	PValue	Genes	List Total	Pop Hits	Pop Total	Fold Enrichment	Bonferroni	Benjamini	FDR
INTERPRO	IPR027417:P-loop containing nucleoside triphosphate hydrolase	135	8.78334	3.72077e-13	P46940, Q9Y5M8, P51531, O60306, Q9UHD8, O75351, P52701, P36915, P36404, P62070, P36405, O00571, Q9Y5Y2, P35249, Q9NTJ3, P51532, P35250, P35251, P15153, P00568, Q9BUJ2, P26196, Q92878, P46459, Q8TDD1, P20592, Q14344, P61586, Q92930, P53384, O60313, P35998, P60953, P61026, Q7L014, P61020, P62195, P61221, Q9H223, Q05193, P84095, Q3YEC7, P20591, P17980, P49736, Q92900, Q9BW83, P61224, P62834, P08754,…	1504	879	18559	1.89519	8.75028e-10	2.91676e-10	6.51756e-10
UP_KEYWORDS	GTP-binding	64	4.16396	1.82974e-11	Q9Y5M8, P62820, P00367, Q9UHD8, P36404, P36915, P36405, P62070, P53597, P61006, Q15029, Q9BZE4, P18085, P68366, P15153, Q96I99, Q9BQE3, P63096, P84077, Q9UL25, P61011, P62491, P61019, Q9H0U4, P20592, P63000, Q14344, O60841, P61586, Q92930, Q2VIR3, P84085, O60313, Q9UIJ7, Q9Y295, P60953, P61026, Q14978, Q9NVA2, P30520, P61020, P04899, Q9HB90, Q05193, Q3YEC7, P84095, P20591, O00429, P20340, P61224,…	1532	343	20581	2.50665	8.7096e-09	2.9032e-10	2.61668e-08
UP_SEQ_FEATURE	nucleotide phosphate-binding region:GTP	59	3.83865	1.06349e-10	Q9Y5M8, P62820, Q9UHD8, P36404, P36915, P62070, P36405, P61006, Q15029, Q9BZE4, P18085, P68366, P15153, Q9BQE3, P63096, P84077, Q9UL25, P61011, P62491, P61019, Q9H0U4, P20592, P63000, Q14344, O60841, P61586, Q92930, P84085, O60313, Q9UIJ7, Q9Y295, P60953, P61026, P30520, Q9NVA2, P61020, P04899, Q9HB90, Q05193, Q3YEC7, P84095, P20591, O00429, P20340, P61224, P62834, Q9BW83, P08754, Q9NR31, Q96RP9,…	1520	310	20063	2.51213	4.16461e-07	1.04115e-07	1.9718e-07
GOTERM_MF_DIRECT	GO:0003924~GTPase activity	53	3.44828	3.23473e-10	P62820, Q9UHD8, P36404, P36915, P62070, P36405, O00571, P61006, Q15029, Q9BZE4, P18085, P15153, P68366, Q9BQE3, P63096, P84077, Q9UL25, P61011, P62491, P61019, P20592, P63000, Q14344, O60841, P61586, Q92930, Q2VIR3, P84085, O60313, P60953, P61026, P61020, Q14692, P04899, Q05193, Q9HB90, P84095, P20591, P62879, O00429, P20340, P61224, P62834, P08754, Q96RP9, Q9NP72, P51149, P51148, P20339, P32455,…	1490	234	16881	2.56609	4.38629e-07	3.98753e-08	5.30899e-07
GOTERM_MF_DIRECT	GO:0005525~GTP binding	70	4.55433	8.06473e-09	Q9Y5M8, P62820, P00367, Q9UHD8, P36404, P36915, P36405, P62070, P53597, P61006, Q15029, Q9BZE4, P08133, P18085, P68366, P15153, Q96I99, Q9BQE3, P63096, P84077, Q9UL25, P61011, P62491, P61019, Q9H0U4, P20592, P63000, Q14344, O60841, P61586, Q92930, Q2VIR3, P84085, O60313, Q9UIJ7, Q9Y295, P60953, P61026, Q02790, Q14978, Q9NVA2, P30520, Q14692, P61020, P04899, Q9H223, Q9HB90, Q05193, Q3YEC7, P84095,…	1490	384	16881	2.06528	1.09357e-05	6.83486e-07	1.32362e-05
INTERPRO	IPR005225:Small GTP-binding protein domain	37	2.40729	4.54317e-08	P62820, Q9Y295, Q9UHD8, P60953, P36404, P62070, P61026, P36405, P61006, Q15029, P61020, Q9BZE4, P18085, P84095, P15153, P20340, P84077, P62834, P61224, Q9BW83, Q9NR31, Q9UL25, Q96RP9, Q9NP72, P51149, P62491, Q9H0U4, P61019, P51148, P63000, P20339, O60841, P61586, Q92930, P62330, P84085, P01112	1504	167	18559	2.73396	0.00010685	1.33568e-05	7.95899e-05
UP_SEQ_FEATURE	short sequence motif:Effector region	23	1.49642	5.26804e-06	P62820, P60953, Q9UL25, P62070, P61026, Q9NP72, P61006, P62491, P51149, P61020, P61019, Q9H0U4, P51148, P63000, P20339, P84095, P15153, P61586, Q92930, P20340, P61224, P62834, P01112	1520	101	20063	3.00579	0.0204184	0.00137437	0.00976699
UP_KEYWORDS	Prenylation	29	1.88679	4.59254e-05	P62820, P31689, P60953, P62070, P61026, P61006, P59768, P61020, P84095, P15153, Q9BRT3, P20340, P62834, P61224, Q9UL25, Q9NP72, O60884, P62491, P51149, Q9H0U4, P61019, P63000, P51148, P20339, P55209, P32455, P61586, Q92930, P01112	1532	168	20581	2.31898	0.0216238	0.000364283	0.0656569
UP_SEQ_FEATURE	lipid moiety-binding region:S-geranylgeranyl cysteine	22	1.43136	5.22519e-05	P62820, P60953, Q9UL25, P61026, Q9NP72, P61006, P59768, P62491, P51149, P61020, P61019, Q9H0U4, P63000, P51148, P20339, P84095, P15153, P61586, Q92930, P20340, P61224, P62834	1520	108	20063	2.68875	0.185046	0.00885722	0.0968354
INTERPRO	IPR001806:Small GTPase superfamily	25	1.62655	0.000316506	P62820, P60953, P61026, P62070, P61006, P61020, P84095, Q3YEC7, P15153, P20340, P62834, P61224, Q9BW83, Q9UL25, Q9NP72, P62491, P51149, Q9H0U4, P61019, P63000, P51148, P20339, P61586, Q92930, P01112	1504	139	18559	2.21938	0.525047	0.025347	0.553027
PFAM	PF00071:Ras family	25	1.62655	0.000418946	P62820, P60953, P61026, P62070, P61006, P61020, P84095, Q3YEC7, P15153, P20340, P62834, P61224, Q9BW83, Q9UL25, Q9NP72, P62491, P51149, Q9H0U4, P61019, P63000, P51148, P20339, P61586, Q92930, P01112	1444	139	17475	2.17658	0.408226	0.0427773	0.6787
GOTERM_BP_DIRECT	GO:0007264~small GTPase mediated signal transduction	39	2.53741	0.000430073	Q92608, Q9Y5M8, P62820, Q8NF50, P60953, P36404, P62070, P61026, P36405, Q96N67, P61006, P61020, Q9HB90, P18085, P84095, Q3YEC7, P15153, P20340, P84077, P62834, P61224, Q9BW83, Q9UL25, Q9NP72, Q07960, P51149, P62491, Q9H0U4, P61019, P51148, P63000, P20339, Q86X27, P61586, Q92930, P62330, Q12979, P84085, P01112	1475	246	16792	1.80484	0.821591	0.0164372	0.79636
Annotation Cluster 18	TCA
Category	Term	Count	%	PValue	Genes	List Total	Pop Hits	Pop Total	Fold Enrichment	Bonferroni	Benjamini	FDR
KEGG_PATHWAY	hsa01200:Carbon metabolism	36	2.34223	1.10878e-07	P00367, P23368, P53597, P17174, P00505, P48735, P04040, P09622, P11766, P17858, P11908, P31040, P13929, Q96I99, P09104, P10768, P36957, P51553, P37837, P21912, P06744, Q02218, P19367, Q2TB90, P09972, Q6NVY1, P60891, P11413, P52209, P30084, P40939, P49247, P07954, P50213, O75390, Q9P2R7	854	113	6910	2.57777	3.01583e-05	2.15419e-06	0.000145951
GOTERM_BP_DIRECT	GO:0006099~tricarboxylic acid cycle	14	0.910865	3.09613e-07	P21912, P53597, P48735, Q02218, P09622, P31040, Q96I99, P07954, P50213, O75390, P36957, Q9P2R7, P51553, Q13423	1475	29	16792	5.49592	0.00123985	2.06768e-05	0.000575475
UP_KEYWORDS	Tricarboxylic acid cycle	11	0.71568	3.75286e-06	P31040, P21912, P53597, Q96I99, P48735, P50213, P07954, P36957, O75390, Q9P2R7, P51553	1532	24	20581	6.15728	0.00178477	3.24788e-05	0.00536675
KEGG_PATHWAY	hsa00020:Citrate cycle (TCA cycle)	14	0.910865	2.24222e-05	P21912, P53597, P48735, Q02218, P09622, P31040, Q96I99, P53396, P07954, P50213, P36957, O75390, P51553, Q9P2R7	854	30	6910	3.77596	0.00608035	0.000304899	0.0295108
Annotation Cluster 19	RNA helicase
Category	Term	Count	%	PValue	Genes	List Total	Pop Hits	Pop Total	Fold Enrichment	Bonferroni	Benjamini	FDR
INTERPRO	IPR014014:RNA helicase, DEAD-box type, Q motif	16	1.04099	6.67859e-08	Q9NR30, P26196, Q86XP3, Q8TDD1, Q7L014, Q9BUQ8, O00571, Q14240, Q9NUU7, Q13838, Q9NY93, Q92499, Q9GZR7, Q9NVP1, P38919, Q96GQ7	1504	37	18559	5.33611	0.000157068	1.74532e-05	0.000116999
GOTERM_MF_DIRECT	GO:0004004~ATP-dependent RNA helicase activity	22	1.43136	8.51714e-08	Q9NR30, P26196, Q86XP3, O75643, Q8TDD1, Q7L014, Q9BUQ8, O00571, Q14240, Q9NUU7, Q13838, Q9NY93, Q92620, Q92499, Q08211, Q13283, O43143, Q9NVP1, Q9GZR7, P38919, Q92900, Q96GQ7	1490	65	16881	3.83461	0.000115486	5.77461e-06	0.000139787
UP_KEYWORDS	Helicase	31	2.01692	1.80633e-07	P51531, Q86XP3, Q7L014, O00571, Q14240, P51532, Q92620, Q08211, Q13283, P49736, P38919, Q92900, P26196, Q9NR30, O75643, Q8TDD1, Q9BUQ8, P13010, P46063, O60264, Q9NUU7, Q13838, P25205, P33993, P33992, Q9NY93, Q92499, O43143, Q9GZR7, Q9NVP1, Q96GQ7	1532	143	20581	2.91228	8.59778e-05	1.9107e-06	0.00025832
INTERPRO	IPR011545:DNA/RNA helicase, DEAD/DEAH box type, N-terminal	21	1.3663	3.16859e-07	Q9NR30, P26196, Q86XP3, O75643, Q8TDD1, Q7L014, Q9BUQ8, O00571, Q14240, P46063, Q9NUU7, Q13838, Q9NY93, Q92620, Q92499, Q08211, O43143, Q9NVP1, Q9GZR7, P38919, Q96GQ7	1504	69	18559	3.75558	0.000744974	6.77478e-05	0.00055509
PFAM	PF00270:DEAD/DEAH box helicase	21	1.3663	4.30871e-07	Q9NR30, P26196, Q86XP3, O75643, Q8TDD1, Q7L014, Q9BUQ8, O00571, Q14240, P46063, Q9NUU7, Q13838, Q9NY93, Q92620, Q92499, Q08211, O43143, Q9NVP1, Q9GZR7, P38919, Q96GQ7	1444	69	17475	3.68316	0.000539306	0.000107884	0.00070025
UP_SEQ_FEATURE	short sequence motif:Q motif	15	0.975927	6.80622e-07	Q9NR30, P26196, Q86XP3, Q8TDD1, Q7L014, Q9BUQ8, O00571, Q14240, Q9NUU7, Q13838, Q9NY93, Q9GZR7, Q9NVP1, P38919, Q96GQ7	1520	40	20063	4.94975	0.00266177	0.000242272	0.00126193
UP_SEQ_FEATURE	short sequence motif:DEAD box	14	0.910865	1.12982e-06	P26196, Q86XP3, Q8TDD1, Q7L014, Q9BUQ8, O00571, Q14240, Q9NUU7, Q9NY93, Q92499, Q9GZR7, Q9NVP1, P38919, Q96GQ7	1520	36	20063	5.13308	0.0044146	0.00036863	0.00209477
GOTERM_BP_DIRECT	GO:0010501~RNA secondary structure unwinding	16	1.04099	2.61902e-06	Q9NR30, P26196, Q86XP3, Q8TDD1, Q7L014, Q9BUQ8, O00571, Q14240, Q9NUU7, Q13838, Q9NY93, Q92499, Q9GZR7, Q9NVP1, P38919, Q96GQ7	1475	44	16792	4.13978	0.0104396	0.000152082	0.00486785
INTERPRO	IPR000629:RNA helicase, ATP-dependent, DEAD-box, conserved site	12	0.780742	3.65585e-06	P26196, Q86XP3, Q8TDD1, Q7L014, Q9BUQ8, O00571, Q9NVP1, Q9GZR7, Q14240, P38919, P41208, Q96GQ7	1504	27	18559	5.48434	0.00856171	0.000573074	0.00640434
PFAM	PF00271:Helicase conserved C-terminal domain	24	1.56148	1.43549e-05	P51531, Q9NR30, P26196, Q86XP3, O75643, Q7L014, Q8TDD1, Q9BUQ8, O00571, Q14240, P46063, O60264, Q9NUU7, P51532, Q13838, Q9NY93, Q92620, Q92499, Q08211, O43143, Q9NVP1, Q9GZR7, P38919, Q96GQ7	1444	106	17475	2.74003	0.017812	0.00256421	0.0233271
INTERPRO	IPR001650:Helicase, C-terminal	24	1.56148	1.45475e-05	P51531, Q9NR30, P26196, Q86XP3, O75643, Q7L014, Q8TDD1, Q9BUQ8, O00571, Q14240, P46063, O60264, Q9NUU7, P51532, Q13838, Q9NY93, Q92620, Q92499, Q08211, O43143, Q9NVP1, Q9GZR7, P38919, Q96GQ7	1504	108	18559	2.74217	0.0336371	0.00189908	0.025482
UP_SEQ_FEATURE	domain:Helicase C-terminal	23	1.49642	1.63741e-05	P51531, Q9NR30, P26196, Q86XP3, Q8TDD1, Q7L014, Q9BUQ8, O00571, Q14240, P46063, O60264, Q9NUU7, P51532, Q13838, Q9NY93, Q92620, Q92499, Q08211, O43143, Q9NVP1, Q9GZR7, P38919, Q96GQ7	1520	108	20063	2.81097	0.0621089	0.00355596	0.0303547
INTERPRO	IPR014001:Helicase, superfamily 1/2, ATP-binding domain	24	1.56148	1.99216e-05	P51531, Q9NR30, P26196, Q86XP3, O75643, Q7L014, Q8TDD1, Q9BUQ8, O00571, Q14240, P46063, O60264, Q9NUU7, P51532, Q13838, Q9NY93, Q92620, Q92499, Q08211, O43143, Q9NVP1, Q9GZR7, P38919, Q96GQ7	1504	110	18559	2.69231	0.0457752	0.00222875	0.034894
UP_SEQ_FEATURE	domain:Helicase ATP-binding	23	1.49642	3.94917e-05	P51531, Q9NR30, P26196, Q86XP3, Q8TDD1, Q7L014, Q9BUQ8, O00571, Q14240, P46063, O60264, Q9NUU7, P51532, Q13838, Q9NY93, Q92620, Q92499, Q08211, O43143, Q9NVP1, Q9GZR7, P38919, Q96GQ7	1520	114	20063	2.66303	0.143287	0.00733735	0.0731958
GOTERM_MF_DIRECT	GO:0004386~helicase activity	19	1.23617	0.000372597	P51531, P26196, P04083, Q86XP3, O75643, Q9BUQ8, O00571, Q14240, O60264, Q9NUU7, P51532, Q15056, Q92499, Q08211, Q9NVP1, Q9GZR7, P38919, Q92900, Q96GQ7	1490	85	16881	2.53248	0.396697	0.0128737	0.609771
Annotation Cluster 20	Cell cycle
Category	Term	Count	%	PValue	Genes	List Total	Pop Hits	Pop Total	Fold Enrichment	Bonferroni	Benjamini	FDR
UP_KEYWORDS	Cell cycle	96	6.24593	1.41343e-10	O75351, Q9UHD8, Q8WW12, P36404, Q15003, P36405, Q99986, P43034, Q9NTJ3, P41208, P62136, Q99459, Q9ULC4, Q09028, P61289, Q13526, P18858, Q13564, P63096, Q13422, P23396, Q9Y266, Q8IXM3, P06400, Q9BPX3, Q16543, P84090, Q9UQ88, Q08J23, Q92974, P62140, Q12824, Q92878, P62491, Q93008, O94804, Q15021, Q13620, O60216, O00762, P61586, Q15007, P63244, P50749, Q15555, Q13112, Q8IX12, Q7Z3K3, Q15554, P60953,…	1532	650	20581	1.98411	6.72794e-08	2.10248e-09	2.02132e-07
UP_KEYWORDS	Cell division	58	3.77358	6.01696e-07	O75351, Q9UHD8, P36405, Q15003, Q99986, P43034, Q9NTJ3, P41208, P62136, P18858, P63096, Q9Y266, P23396, Q9BPX3, Q16543, Q08J23, Q92974, P62140, Q93008, Q15021, O60216, O00762, P61586, Q15555, Q7Z3K3, P36873, O43670, P60953, Q9NVA2, P06493, Q8NFH4, Q9Y5K6, P04899, P46736, P50995, O75122, O75935, Q00610, Q9P258, Q96MF7, P63279, P51808, P08754, Q9HBM1, O43684, Q9Y6D9, P18754, Q29RF7, Q8WYJ6, O15392,…	1532	388	20581	2.00819	0.000286366	5.9668e-06	0.000860469
GOTERM_BP_DIRECT	GO:0051301~cell division	56	3.64346	1.5437e-05	Q9UHD8, Q15003, Q99986, P27816, Q9NTJ3, P41208, P62136, Q9BQE3, P18858, P63096, Q9Y266, P23396, P06400, Q9BPX3, Q16543, Q08J23, Q92974, P62140, Q93008, Q15021, O60216, O00762, Q15555, Q7Z3K3, P36873, O43670, P60953, Q9NVA2, Q8NFH4, P06493, Q9Y5K6, P04899, P46736, P50995, O75122, Q00610, Q9P258, Q96MF7, P63279, P51808, P08754, Q9HBM1, O43684, Q9Y6D9, P18754, Q29RF7, Q8WYJ6, O15392, P33992, P63172,…	1475	350	16792	1.82151	0.0599824	0.000782689	0.0286888
UP_KEYWORDS	Mitosis	38	2.47235	0.000124547	O43670, Q15003, Q99986, P43034, P06493, Q8NFH4, Q9Y5K6, Q9NTJ3, P41208, P46736, O75122, O75935, Q00610, Q9P258, Q9Y266, P63279, Q96MF7, P23396, P51808, Q9BPX3, Q08J23, Q9HBM1, O43684, Q92974, Q9Y6D9, Q29RF7, P18754, Q93008, O15392, Q15021, P63172, O60216, O00762, O95347, Q15691, Q9BW19, O00139, Q15555	1532	262	20581	1.94845	0.0575649	0.00094064	0.177965
GOTERM_BP_DIRECT	GO:0007067~mitotic nuclear division	35	2.27716	0.00611077	Q99986, Q14978, P43034, Q9HC35, Q8NFH4, P06493, Q9Y5K6, P41208, P46736, O75935, Q00610, Q9P258, P63279, Q96MF7, P23396, Q9Y266, P51808, Q08J23, Q9UQ88, Q9HBM1, O95619, Q92974, Q13561, Q99567, P18754, Q9Y2Z0, O14974, Q93008, O15392, P63172, O60216, Q14203, Q15691, Q15555, Q01130	1475	248	16792	1.60667	1	0.153869	10.7679
Annotation Cluster 21	RNA binding
Category	Term	Count	%	PValue	Genes	List Total	Pop Hits	Pop Total	Fold Enrichment	Bonferroni	Benjamini	FDR
UP_KEYWORDS	Protein biosynthesis	55	3.5784	1.88351e-23	P60228, Q15369, P47897, Q14240, P47813, Q9ULC4, Q15370, P43897, O43583, Q14197, Q9Y285, P49588, O75822, Q13155, O75821, P41252, P62495, Q9NSE4, Q04637, P41214, P54577, P41250, P41567, Q13347, O43776, O15372, O60841, Q9NSD9, O15371, Q9P2J5, O43324, Q2VIR3, P49591, P56537, P56192, Q7L2H7, P14868, P54136, Q15056, O00267, O60739, Q96RP9, P26639, Q14152, P55884, Q9Y262, P26640, P06730, Q15046, P07814,…	1532	152	20581	4.86101	8.96553e-21	5.60345e-22	2.69357e-20
GOTERM_BP_DIRECT	GO:0006418~tRNA aminoacylation for protein translation	23	1.49642	1.17924e-13	Q9H2U2, Q9Y285, P56192, P49588, P14868, Q13155, P47897, P26639, P41252, Q9NSE4, P41250, P54577, P54136, Q15181, P26640, Q15046, O43776, P07814, P12081, Q9NSD9, Q9P2J5, O43324, P49591	1475	40	16792	6.54603	4.72448e-10	1.52403e-11	2.19147e-10
UP_KEYWORDS	Aminoacyl-tRNA synthetase	19	1.23617	3.51832e-11	Q9Y285, P56192, P49588, P14868, P47897, P26639, P41252, Q9NSE4, P54577, P41250, P54136, P26640, Q15046, O43776, P07814, P12081, Q9NSD9, Q9P2J5, P49591	1532	38	20581	6.71704	1.67472e-08	5.40232e-10	5.03148e-08
UP_SEQ_FEATURE	short sequence motif:"HIGH" region	9	0.585556	2.32876e-05	P26640, P56192, P07814, Q9P2J5, P47897, P41252, Q9NSE4, P54577, P54136	1520	18	20063	6.59967	0.0871607	0.00478826	0.0431686
GOTERM_MF_DIRECT	GO:0004812~aminoacyl-tRNA ligase activity	9	0.585556	4.22826e-05	P26640, Q9Y285, P56192, Q15046, Q9P2J5, P12081, P47897, P41252, P54577	1490	17	16881	5.99799	0.0557237	0.00204564	0.0693737
GOTERM_MF_DIRECT	GO:0002161~aminoacyl-tRNA editing activity	7	0.455433	7.16984e-05	P26640, P49588, Q9P2J5, P41252, Q96FN9, Q9NSE4, Q8TEA8	1490	10	16881	7.93067	0.0926496	0.00334703	0.11761
INTERPRO	IPR001412:Aminoacyl-tRNA synthetase, class I, conserved site	8	0.520494	8.10343e-05	P26640, P56192, P07814, Q9P2J5, P47897, P41252, Q9NSE4, P54136	1504	15	18559	6.58121	0.173537	0.00759503	0.141866
UP_SEQ_FEATURE	short sequence motif:"KMSKS" region	8	0.520494	8.73964e-05	P26640, P56192, P07814, Q9P2J5, P47897, P41252, Q9NSE4, P54577	1520	16	20063	6.59967	0.289836	0.0141596	0.161917
INTERPRO	IPR014729:Rossmann-like alpha/beta/alpha sandwich fold	12	0.780742	0.000386567	P26640, P56192, P07814, P38117, Q9P2J5, P47897, P41252, Q9NSE4, P49915, P54577, P54136, Q96RU3	1504	42	18559	3.52565	0.597227	0.0289088	0.675053
UP_KEYWORDS	Ligase	44	2.86272	0.000686565	P56192, O94874, P14868, P47897, P53597, P30520, P49915, P54136, P11586, Q9Y314, Q9HCC0, P22102, P61081, P49792, P27708, Q9Y3I0, Q14139, P62877, P18858, Q96I99, Q96MF7, P63279, Q9UBT2, Q9Y285, P49588, A0AVT1, P26639, Q4G176, P41252, Q9NSE4, P54577, P41250, Q9UBE0, P26640, Q15046, O43776, P48637, P07814, P12081, Q9NSD9, O15067, Q9P2J5, P49591, Q9P2R7	1532	347	20581	1.70346	0.278856	0.00402788	0.977371
KEGG_PATHWAY	hsa00970:Aminoacyl-tRNA biosynthesis	19	1.23617	0.000778387	Q9Y285, P56192, P49588, P14868, P47897, P26639, P41252, Q9NSE4, P54577, P41250, P54136, P26640, Q15046, O43776, P07814, P12081, Q9NSD9, Q9P2J5, P49591	854	66	6910	2.32932	0.190877	0.00680909	1.01977
GOTERM_BP_DIRECT	GO:0006450~regulation of translational fidelity	7	0.455433	0.00113065	P26640, P49588, Q9P2J5, P41252, Q96FN9, Q9NSE4, Q8TEA8	1475	15	16792	5.31272	0.989253	0.0389838	2.08078
INTERPRO	IPR009080:Aminoacyl-tRNA synthetase, class 1a, anticodon-binding	6	0.390371	0.00256312	P26640, P56192, Q9P2J5, P41252, Q9NSE4, P54136	1504	13	18559	5.69527	0.997609	0.120524	4.39641
INTERPRO	IPR002300:Aminoacyl-tRNA synthetase, class Ia	4	0.260247	0.0087967	P26640, Q9P2J5, P41252, Q9NSE4	1504	6	18559	8.22651	1	0.301136	14.3403
INTERPRO	IPR009008:Valyl/Leucyl/Isoleucyl-tRNA synthetase, class Ia, editing domain	4	0.260247	0.0087967	P26640, Q9P2J5, P41252, Q9NSE4	1504	6	18559	8.22651	1	0.301136	14.3403
INTERPRO	IPR013155:Valyl/Leucyl/Isoleucyl-tRNA synthetase, class I, anticodon-binding	4	0.260247	0.0087967	P26640, Q9P2J5, P41252, Q9NSE4	1504	6	18559	8.22651	1	0.301136	14.3403
PFAM	PF00133:tRNA synthetases class I (I, L, M and V)	4	0.260247	0.00928948	P26640, Q9P2J5, P41252, Q9NSE4	1444	6	17475	8.06787	0.999992	0.373365	14.0735
PFAM	PF08264:Anticodon-binding domain of tRNA	4	0.260247	0.00928948	P26640, Q9P2J5, P41252, Q9NSE4	1444	6	17475	8.06787	0.999992	0.373365	14.0735
GOTERM_MF_DIRECT	GO:0000049~tRNA binding	10	0.650618	0.0326978	Q9Y285, Q08J23, P56192, Q15046, P05455, P49588, P41252, Q9NSE4, P54577, P54136	1490	51	16881	2.22148	1	0.368711	42.0518
Annotation Cluster 22	Transport vesicle
Category	Term	Count	%	PValue	Genes	List Total	Pop Hits	Pop Total	Fold Enrichment	Bonferroni	Benjamini	FDR
GOTERM_BP_DIRECT	GO:0006890~retrograde vesicle-mediated transport, Golgi to ER	24	1.56148	3.48721e-07	P62820, P46459, Q9BVK6, P48739, P49755, P35606, Q12840, Q9H0U4, O15533, P53621, P18085, Q9UBF2, Q9Y678, Q8WVM8, P61923, Q15363, P48444, O00139, P20340, P84085, Q9H4A6, P54920, P53618, O14579	1475	82	16792	3.33202	0.00139635	2.25373e-05	0.000648165
GOTERM_CC_DIRECT	GO:0030126~COPI vesicle coat	8	0.520494	5.38766e-05	P53621, Q9UBF2, Q9Y678, P61923, P35606, P48444, O14579, P53618	1511	14	18224	6.89194	0.0433214	0.000725765	0.0829633
GOTERM_CC_DIRECT	GO:0030133~transport vesicle	21	1.3663	8.40569e-05	Q9BVK6, P49755, Q96FS4, P35606, P62491, P30040, Q9H0U4, P20645, P53621, O60763, Q9Y678, Q9UBF2, O60664, P61923, Q15363, Q9H8W4, P48444, P08631, O43493, P53618, O14579	1511	95	18224	2.66609	0.0667645	0.00107907	0.129409
Annotation Cluster 23	DNA replication
Category	Term	Count	%	PValue	Genes	List Total	Pop Hits	Pop Total	Fold Enrichment	Bonferroni	Benjamini	FDR
GOTERM_BP_DIRECT	GO:0006283~transcription-coupled nucleotide-excision repair	35	2.27716	3.15083e-17	Q16531, O60306, P35244, P49005, P35249, P62487, Q9BT78, P62979, P36954, P35250, Q99627, P35251, P28340, Q9UNS2, Q13098, Q15054, P62877, P18858, P27694, P52434, P52435, Q7L5N1, Q9HCU8, P15927, P19388, Q93009, P19387, P24928, Q9UNP9, Q13620, P53803, P40938, P40937, P18887, Q9H9Q2	1475	74	16792	5.38452	1.26254e-13	6.3127e-15	5.85644e-14
GOTERM_BP_DIRECT	GO:0042769~DNA damage response, detection of DNA damage	19	1.23617	1.6907e-10	Q16531, P27694, P31689, Q9HCU8, P35244, P49005, P35249, P15927, P62979, P35250, Q13620, P35251, P28340, P62877, Q15054, P40938, P40937, P23396, Q9BYN8	1475	36	16792	6.00844	6.77463e-07	1.69366e-08	3.14249e-07
GOTERM_BP_DIRECT	GO:0006297~nucleotide-excision repair, DNA gap filling	15	0.975927	1.28309e-09	P27694, Q9HCU8, P35244, P49005, P35249, P15927, P62979, P35250, P35251, P28340, Q15054, P18858, P40938, P40937, P18887	1475	24	16792	7.11525	5.14132e-06	1.22413e-07	2.38487e-06
GOTERM_BP_DIRECT	GO:0000722~telomere maintenance via recombination	16	1.04099	1.77395e-08	P27694, Q92878, Q9HCU8, P35244, P49643, P49005, P35249, P15927, P35250, P35251, P28340, Q15054, P18858, P40938, P40937, Q96MF7	1475	32	16792	5.6922	7.10798e-05	1.51239e-06	3.29724e-05
KEGG_PATHWAY	hsa03030:DNA replication	19	1.23617	3.84233e-08	P27694, Q9HCU8, P35244, P49643, P49005, P35249, O75792, P15927, P25205, P33993, P33992, P35250, P35251, P28340, Q15054, P18858, P40938, P40937, P49736	854	36	6910	4.27043	1.04511e-05	9.50104e-07	5.05774e-05
KEGG_PATHWAY	hsa03430:Mismatch repair	15	0.975927	4.80672e-08	P27694, P52701, Q9HCU8, P35244, P49005, P35249, P15927, P35250, P35251, P28340, Q15054, P18858, P40938, P40937, P43246	854	23	6910	5.27696	1.30742e-05	1.08952e-06	6.32719e-05
GOTERM_BP_DIRECT	GO:0006296~nucleotide-excision repair, DNA incision, 5'-to lesion	16	1.04099	1.92453e-07	Q16531, P27694, Q9HCU8, P35244, P49005, P35249, P15927, P62979, P35250, Q13620, P35251, P28340, P62877, Q15054, P40938, P40937	1475	37	16792	4.92299	0.00077086	1.40209e-05	0.00035771
UP_KEYWORDS	DNA replication	24	1.56148	2.71114e-07	P27694, Q9HCU8, P35244, P49643, P49005, P35249, Q9Y5B9, Q8TEA8, P15927, P25205, P33993, P33992, P23921, Q09028, P35250, P35251, P28340, Q15054, P18858, P40938, P40937, Q7LG56, P49736, Q13112	1532	94	20581	3.42998	0.000129042	2.74575e-06	0.000387714
GOTERM_BP_DIRECT	GO:0033683~nucleotide-excision repair, DNA incision	16	1.04099	2.9223e-07	Q16531, P27694, Q9HCU8, P35244, P49005, P35249, P15927, P62979, P35250, Q13620, P35251, P28340, P62877, Q15054, P40938, P40937	1475	38	16792	4.79343	0.00117028	2.01889e-05	0.000543165
GOTERM_BP_DIRECT	GO:0019985~translesion synthesis	14	0.910865	5.87325e-06	P27694, P62979, P35250, P35251, P28340, Q9HCU8, Q15054, O14933, P35244, P40938, P40937, P49005, P35249, P15927	1475	36	16792	4.42727	0.0232594	0.000317979	0.010916
GOTERM_BP_DIRECT	GO:0006260~DNA replication	32	2.08198	1.08127e-05	P11387, P35244, P49005, P06493, P35249, Q8TEA8, Q969P6, Q13315, Q09028, P35250, P35251, P28340, Q15054, P18858, P49736, Q92900, P27694, Q01105, Q92878, Q9HCU8, P52948, Q9Y5B9, O75792, P15927, P25205, P33993, P33992, P23921, P55209, P40938, P40937, Q13112	1475	155	16792	2.35033	0.0424017	0.000577525	0.0200957
GOTERM_BP_DIRECT	GO:0070987~error-free translesion synthesis	10	0.650618	1.23733e-05	P27694, P62979, P35250, P35251, P35244, P40938, P40937, Q92890, P35249, P15927	1475	19	16792	5.99179	0.0483712	0.000643692	0.0229957
KEGG_PATHWAY	hsa03420:Nucleotide excision repair	18	1.17111	2.26243e-05	Q16531, P27694, Q9HCU8, P35244, P49005, P35249, P41208, P15927, P54727, P35250, Q13620, P35251, P28340, P62877, Q15054, P18858, P40938, P40937	854	47	6910	3.09881	0.00613497	0.000292999	0.0297767
GOTERM_BP_DIRECT	GO:0042276~error-prone translesion synthesis	9	0.585556	0.000108153	P27694, P62979, P35250, P35251, P35244, P40938, P40937, P35249, P15927	1475	19	16792	5.39261	0.351695	0.00496916	0.200833
INTERPRO	IPR008921:DNA polymerase III, clamp loader complex, gamma/delta/delta subunit, C-terminal	5	0.325309	0.000562557	P35250, P35251, P40938, P40937, P35249	1504	6	18559	10.2831	0.7338	0.0381788	0.980955
GOTERM_CC_DIRECT	GO:0005663~DNA replication factor C complex	5	0.325309	0.000614479	P35250, P35251, P40938, P40937, P35249	1511	6	18224	10.0507	0.396649	0.00585785	0.942411
GOTERM_BP_DIRECT	GO:0006298~mismatch repair	11	0.71568	0.000626311	P27694, P52701, P28340, Q9HCU8, Q15054, P18858, P35244, P49005, P43246, O75792, P15927	1475	35	16792	3.57796	0.918766	0.0229765	1.15773
GOTERM_BP_DIRECT	GO:0006271~DNA strand elongation involved in DNA replication	7	0.455433	0.00113065	P28340, Q9HCU8, Q15054, P40938, P49005, P49643, P35249	1475	15	16792	5.31272	0.989253	0.0389838	2.08078
GOTERM_MF_DIRECT	GO:0003689~DNA clamp loader activity	5	0.325309	0.00315723	P35250, P35251, P40938, P40937, P35249	1490	8	16881	7.08096	0.986267	0.067881	5.05762
GOTERM_BP_DIRECT	GO:1900264~positive regulation of DNA-directed DNA polymerase activity	4	0.260247	0.0180396	P35250, P40938, P40937, P35249	1475	7	16792	6.50538	1	0.336218	28.7064
INTERPRO	IPR013748:Replication factor C, C-terminal domain	3	0.195185	0.0186033	P35250, P40937, P35249	1504	3	18559	12.3398	1	0.472762	28.0338
PFAM	PF08542:Replication factor C C-terminal domain	3	0.195185	0.019319	P35250, P40937, P35249	1444	3	17475	12.1018	1	0.545189	27.1702
GOTERM_CC_DIRECT	GO:0031390~Ctf18 RFC-like complex	4	0.260247	0.0231533	P35250, P40938, P40937, P35249	1511	8	18224	6.03044	1	0.135736	30.2926
GOTERM_BP_DIRECT	GO:1901796~regulation of signal transduction by p53 class mediator	19	1.23617	0.0231547	P27694, Q92878, P35244, P67870, P35249, P68400, Q9Y5B9, Q96S44, P15927, Q13315, Q13547, P62979, P35250, Q09028, Q13526, O94776, P40938, P40937, P29590	1475	124	16792	1.74438	1	0.388277	35.3017
Annotation Cluster 24	Viral nucleoprotein
Category	Term	Count	%	PValue	Genes	List Total	Pop Hits	Pop Total	Fold Enrichment	Bonferroni	Benjamini	FDR
UP_KEYWORDS	Viral nucleoprotein	12	0.780742	2.44508e-06	P08579, P62314, Q32P51, Q8WWY3, O75643, Q09666, O43390, P08621, Q15029, Q9BUJ2, P09661, P14678	1532	28	20581	5.75746	0.00116318	2.23817e-05	0.00349661
GOTERM_CC_DIRECT	GO:0019013~viral nucleocapsid	12	0.780742	6.95914e-06	P08579, P62314, Q32P51, Q8WWY3, O75643, Q09666, O43390, P08621, Q15029, Q9BUJ2, P09661, P14678	1511	28	18224	5.16895	0.0057041	0.000121704	0.0107198
UP_KEYWORDS	Virion	12	0.780742	0.000533233	P08579, P62314, Q32P51, Q8WWY3, O75643, Q09666, O43390, P08621, Q15029, Q9BUJ2, P09661, P14678	1532	47	20581	3.42998	0.22422	0.0032086	0.759867
Annotation Cluster 25	LSM domain
Category	Term	Count	%	PValue	Genes	List Total	Pop Hits	Pop Total	Fold Enrichment	Bonferroni	Benjamini	FDR
PFAM	PF01423:LSM domain	12	0.780742	9.78534e-08	P62312, O95777, P62314, A8MWD9, P62316, P62306, Q9UK45, O15116, Q9Y333, Q9Y4Z0, P62310, P14678	1444	20	17475	7.26108	0.000122505	3.06277e-05	0.000159031
INTERPRO	IPR001163:Ribonucleoprotein LSM domain	12	0.780742	1.56096e-07	P62312, O95777, P62314, A8MWD9, P62316, P62306, Q9UK45, O15116, Q9Y333, Q9Y4Z0, P62310, P14678	1504	21	18559	7.05129	0.000367069	3.6713e-05	0.000273457
INTERPRO	IPR010920:Like-Sm (LSM) domain	12	0.780742	8.79128e-07	P62312, O95777, P62314, A8MWD9, P62316, P62306, Q9UK45, O15116, Q9Y333, Q9Y4Z0, P62310, P14678	1504	24	18559	6.16988	0.00206557	0.000147683	0.0015401
GOTERM_CC_DIRECT	GO:0005689~U12-type spliceosomal complex	11	0.71568	2.28415e-05	Q15427, P62314, P62316, P67809, O43143, O75533, P62306, Q9UK45, Q15393, Q9Y3B4, P14678	1511	26	18224	5.10268	0.0186008	0.000329349	0.035181
GOTERM_CC_DIRECT	GO:0005688~U6 snRNP	6	0.390371	7.06905e-05	P62312, Q9UK45, Q9Y333, Q9Y4Z0, P62310, Q13838	1511	7	18224	10.3379	0.0564535	0.000921951	0.108842
GOTERM_CC_DIRECT	GO:0030532~small nuclear ribonucleoprotein complex	8	0.520494	0.000244407	Q15428, P62312, P62314, P62316, P62306, Q15393, P09661, P14678	1511	17	18224	5.67571	0.182028	0.00257267	0.37584
GOTERM_CC_DIRECT	GO:0034719~SMN-Sm protein complex	5	0.325309	0.0467129	P62314, Q9Y3F4, P62316, P62306, P14678	1511	17	18224	3.54732	1	0.234717	52.1429
Annotation Cluster 26	Signalosome
Category	Term	Count	%	PValue	Genes	List Total	Pop Hits	Pop Total	Fold Enrichment	Bonferroni	Benjamini	FDR
GOTERM_BP_DIRECT	GO:0000715~nucleotide-excision repair, DNA damage recognition	12	0.780742	1.1505e-06	P54727, Q16531, P62979, Q7L5N1, Q99627, Q13620, Q9UNS2, Q13098, P62877, P41208, Q9BT78, Q9H9Q2	1475	23	16792	5.93969	0.00459946	6.88046e-05	0.00213841
GOTERM_CC_DIRECT	GO:0008180~COP9 signalosome	11	0.71568	0.00039592	O75955, P80723, Q7L5N1, Q99627, Q9UNS2, Q13098, Q96N67, P63167, Q9UJZ1, Q9BT78, Q9H9Q2	1511	35	18224	3.79056	0.277841	0.00382221	0.608168
UP_KEYWORDS	Signalosome	6	0.390371	0.000415259	Q7L5N1, Q99627, Q9UNS2, Q13098, Q9BT78, Q9H9Q2	1532	10	20581	8.06044	0.179387	0.00263258	0.592216
GOTERM_BP_DIRECT	GO:0010388~cullin deneddylation	6	0.390371	0.000482584	Q7L5N1, Q99627, Q9UNS2, Q13098, Q9BT78, Q9H9Q2	1475	9	16792	7.5896	0.855457	0.0182521	0.89318
Annotation Cluster 27	Isomerase
Category	Term	Count	%	PValue	Genes	List Total	Pop Hits	Pop Total	Fold Enrichment	Bonferroni	Benjamini	FDR
UP_KEYWORDS	Isomerase	32	2.08198	8.89819e-10	P51659, Q15185, P11388, P42126, P11387, Q02790, P62942, Q9H7Z7, P30405, Q13451, Q969P6, Q00688, P07738, O60832, Q13907, Q15257, Q13526, O43708, Q13427, Q9Y3C6, P26885, Q02880, P06744, Q13630, Q9UNP9, Q9Y237, Q9H2H8, P36871, P23284, Q96G03, P49247, O43447	1532	122	20581	3.52369	4.23554e-07	1.21015e-08	1.27251e-06
UP_KEYWORDS	Rotamase	15	0.975927	2.6414e-07	Q02790, P62942, P30405, Q13451, Q00688, Q9UNP9, Q9Y237, Q9H2H8, P23284, Q15257, Q13526, Q13427, Q9Y3C6, P26885, O43447	1532	38	20581	5.30292	0.000125723	2.73327e-06	0.000377741
GOTERM_BP_DIRECT	GO:0000413~protein peptidyl-prolyl isomerization	17	1.10605	3.0804e-07	Q8N5M4, Q02790, P62942, P30405, Q13451, Q00688, Q9UNP9, Q9Y237, Q9H2H8, P23284, P49792, Q15257, Q13526, Q13427, Q9Y3C6, P26885, O43447	1475	43	16792	4.50081	0.00123355	2.09204e-05	0.000572551
GOTERM_MF_DIRECT	GO:0003755~peptidyl-prolyl cis-trans isomerase activity	17	1.10605	9.53681e-07	Q8N5M4, Q02790, P62942, P30405, Q13451, Q00688, Q9UNP9, Q9Y237, Q9H2H8, P23284, P49792, Q15257, Q13526, Q13427, Q9Y3C6, P26885, O43447	1490	46	16881	4.187	0.00129236	5.87797e-05	0.00156522
INTERPRO	IPR020892:Cyclophilin-type peptidyl-prolyl cis-trans isomerase, conserved site	8	0.520494	0.000949572	Q9UNP9, Q9H2H8, P23284, P49792, P30405, Q13427, Q9Y3C6, O43447	1504	21	18559	4.70086	0.892949	0.0586033	1.65053
UP_SEQ_FEATURE	domain:PPIase cyclophilin-type	8	0.520494	0.00154434	Q9UNP9, Q9H2H8, P23284, P49792, P30405, Q13427, Q9Y3C6, O43447	1520	24	20063	4.39978	0.997648	0.137238	2.82489
INTERPRO	IPR002130:Cyclophilin-like peptidyl-prolyl cis-trans isomerase domain	8	0.520494	0.00227922	Q9UNP9, Q9H2H8, P23284, P49792, P30405, Q13427, Q9Y3C6, O43447	1504	24	18559	4.11325	0.995331	0.112426	3.91859
PFAM	PF00160:Cyclophilin type peptidyl-prolyl cis-trans isomerase/CLD	8	0.520494	0.00254681	Q9UNP9, Q9H2H8, P23284, P49792, P30405, Q13427, Q9Y3C6, O43447	1444	24	17475	4.03393	0.958938	0.162531	4.05966
INTERPRO	IPR024936:Cyclophilin-type peptidyl-prolyl cis-trans isomerase	7	0.455433	0.0084815	Q9UNP9, Q9H2H8, P23284, P30405, Q13427, Q9Y3C6, O43447	1504	23	18559	3.75558	1	0.300747	13.8618
GOTERM_MF_DIRECT	GO:0016018~cyclosporin A binding	4	0.260247	0.0182791	Q9UNP9, P30405, Q13427, O43447	1490	7	16881	6.47402	1	0.262928	26.1239
Annotation Cluster 28	Proteasome
Category	Term	Count	%	PValue	Genes	List Total	Pop Hits	Pop Total	Fold Enrichment	Bonferroni	Benjamini	FDR
GOTERM_CC_DIRECT	GO:0022624~proteasome accessory complex	13	0.845804	4.19549e-10	P48556, P35998, Q13200, O43242, Q9UNM6, P17980, Q15008, P62333, Q99460, P62191, O00232, O00487, P62195	1511	17	18224	9.22303	3.44869e-07	1.23168e-08	6.46305e-07
GOTERM_CC_DIRECT	GO:0005838~proteasome regulatory particle	10	0.650618	8.49065e-09	P48556, Q13200, Q9UNM6, Q15008, Q99460, P62191, O75832, O00233, O00232, P62195	1511	11	18224	10.9644	6.97929e-06	2.11494e-07	1.30796e-05
GOTERM_CC_DIRECT	GO:0008540~proteasome regulatory particle, base subcomplex	9	0.585556	7.97694e-07	P35998, Q13200, P17980, P62333, Q99460, P62191, O75832, O00233, P62195	1511	12	18224	9.04567	0.00065549	1.56119e-05	0.00122882
GOTERM_CC_DIRECT	GO:0031597~cytosolic proteasome complex	8	0.520494	2.53782e-06	P35998, P17980, P62333, P62191, Q9Y5K5, P14735, O00487, P62195	1511	10	18224	9.64871	0.00208392	4.63565e-05	0.00390937
GOTERM_CC_DIRECT	GO:0031595~nuclear proteasome complex	6	0.390371	0.000175586	P35998, P17980, P62333, P62191, O00232, P62195	1511	8	18224	9.04567	0.13441	0.00203095	0.270143
PFAM	PF00004:ATPase family associated with various cellular activities (AAA)	13	0.845804	0.000328771	P35998, Q9NVI7, P35250, O75351, P35251, P46459, P17980, P40937, P36776, P62333, P35249, P62191, P62195	1444	47	17475	3.34731	0.337469	0.0367345	0.532981
GOTERM_BP_DIRECT	GO:0045899~positive regulation of RNA polymerase II transcriptional preinitiation complex assembly	6	0.390371	0.000482584	P35998, P17980, P62333, P62191, Q86VP6, P62195	1475	9	16792	7.5896	0.855457	0.0182521	0.89318
INTERPRO	IPR005937:26S proteasome subunit P45	5	0.325309	0.000562557	P35998, P17980, P62333, P62191, P62195	1504	6	18559	10.2831	0.7338	0.0381788	0.980955
INTERPRO	IPR003959:ATPase, AAA-type, core	13	0.845804	0.000617691	P35998, Q9NVI7, P35250, O75351, P35251, P46459, P17980, P40937, P36776, P62333, P35249, P62191, P62195	1504	51	18559	3.14543	0.766192	0.0395643	1.0766
GOTERM_MF_DIRECT	GO:0036402~proteasome-activating ATPase activity	5	0.325309	0.000781956	P35998, P17980, P62333, P62191, P62195	1490	6	16881	9.44128	0.653803	0.0232965	1.27568
INTERPRO	IPR003593:AAA+ ATPase domain	23	1.49642	0.00135045	P35998, Q8NE71, Q9NVI7, O75351, P61011, P46459, Q9BSD7, P36776, Q03519, P35249, P62195, P25205, P61221, P33993, P35250, P35251, Q14204, P53384, P17980, P40938, P40937, P62333, P62191	1504	136	18559	2.08687	0.958348	0.076385	2.33959
GOTERM_BP_DIRECT	GO:1901800~positive regulation of proteasomal protein catabolic process	6	0.390371	0.00993498	P35998, Q96HY6, P17980, P62333, P62191, P62195	1475	16	16792	4.26915	1	0.221241	16.9381
INTERPRO	IPR003960:ATPase, AAA-type, conserved site	7	0.455433	0.0188471	P35998, O75351, P46459, P17980, P62333, P62191, P62195	1504	27	18559	3.1992	1	0.472341	28.3463
GOTERM_BP_DIRECT	GO:0030163~protein catabolic process	9	0.585556	0.0242094	P35998, O14773, P17980, P36776, P62333, P62191, Q9UIQ6, P15374, P62195	1475	41	16792	2.49902	1	0.39879	36.5879
GOTERM_MF_DIRECT	GO:0017025~TBP-class protein binding	6	0.390371	0.0326849	P35998, P17980, P62333, P62191, Q86VP6, P62195	1490	21	16881	3.23701	1	0.371582	42.0392
Annotation Cluster 29	Kinetochore
Category	Term	Count	%	PValue	Genes	List Total	Pop Hits	Pop Total	Fold Enrichment	Bonferroni	Benjamini	FDR
UP_KEYWORDS	Centromere	24	1.56148	0.000189194	O43684, Q8WUM0, Q9HBM1, O43670, Q9Y6D9, P36873, Q8N954, Q8NFH4, O15392, Q96JM3, Q8WVJ2, O60216, P67775, P45973, O75122, O75935, P57740, P50749, Q9UER7, Q9BTE1, Q9P258, Q9BW27, Q8IWS0, P51808	1532	137	20581	2.35341	0.0861282	0.00132361	0.270223
GOTERM_CC_DIRECT	GO:0000777~condensed chromosome kinetochore	19	1.23617	0.000235305	O43684, Q8WUM0, Q9HBM1, O43670, Q9Y6D9, P36873, Q8N954, Q8NFH4, O15392, Q96JM3, Q8WVJ2, O75122, P57740, O75935, P50749, Q9BTE1, Q9BW27, Q8IWS0, P51808	1511	87	18224	2.63399	0.175884	0.0025091	0.361868
UP_KEYWORDS	Kinetochore	19	1.23617	0.000336865	O43684, Q8WUM0, Q9HBM1, O43670, Q9Y6D9, P36873, Q8N954, Q8NFH4, O15392, Q96JM3, Q8WVJ2, O75122, P57740, O75935, P50749, Q9BTE1, Q9BW27, Q8IWS0, P51808	1532	99	20581	2.57826	0.148175	0.00216488	0.480666
Annotation Cluster 30	Immunity/Immunoglobulin/MHC
Category	Term	Count	%	PValue	Genes	List Total	Pop Hits	Pop Total	Fold Enrichment	Bonferroni	Benjamini	FDR
GOTERM_BP_DIRECT	GO:0019886~antigen processing and presentation of exogenous peptide antigen via MHC class II	32	2.08198	1.94758e-11	P20036, Q30154, Q9BXS5, Q30134, P61163, P01911, P01912, Q13409, Q9TQE0, P53992, O75935, P13761, Q00610, P13765, O43747, P84077, P25774, P06340, P27824, P79483, Q13561, P63167, P04229, P13760, P01909, Q12840, P51149, P01903, P04233, P04440, P01906, Q14204, Q14203, P01920, O00139, Q10567, Q9BTE1	1475	92	16792	3.95979	7.80393e-08	2.36483e-09	3.61995e-08
GOTERM_CC_DIRECT	GO:0071556~integral component of lumenal side of endoplasmic reticulum membrane	16	1.04099	1.41514e-09	P27824, P79483, P01892, P20036, P04229, P13760, P30443, Q30154, P18462, P01909, Q30134, P01889, O15533, P01911, P01912, P01903, P04233, P04440, Q9TQE0, P01906, P01920, P51572, P13761, P30460	1511	29	18224	6.65428	1.16324e-06	3.7524e-08	2.17999e-06
GOTERM_CC_DIRECT	GO:0042613~MHC class II protein complex	14	0.910865	2.01632e-09	P06340, P79483, P01892, P20036, P04229, P13760, P30443, Q30154, P18462, P01909, Q30134, P01911, P01912, P01903, P04233, P04440, Q9TQE0, P01906, P01920, P13761, P13765	1511	22	18224	7.67511	1.65741e-06	5.17941e-08	3.10608e-06
UP_SEQ_FEATURE	domain:Ig-like C1-type	16	1.04099	2.37106e-09	P06340, P79483, P01892, P20036, P04229, P13760, P30443, Q30154, P18462, P01909, Q30134, P01889, O15533, P01911, P01912, P01903, P61769, P04440, Q9TQE0, P01906, P01920, P13761, P30460, P13765	1520	32	20063	6.59967	9.28501e-06	1.32644e-06	4.39615e-06
UP_KEYWORDS	MHC II	12	0.780742	3.03497e-09	P06340, P79483, P13760, P20036, P04229, Q30154, P01909, Q30134, P01911, P01912, P01903, P04440, Q9TQE0, P01906, P01920, P13761, P13765	1532	17	20581	9.48288	1.44465e-06	3.90445e-08	4.34025e-06
INTERPRO	IPR014745:MHC class II, alpha/beta chain, N-terminal	13	0.845804	1.12383e-08	P06340, P79483, P01892, P20036, P04229, P13760, P30443, Q30154, P18462, P01909, Q30134, P01911, P01912, P01903, P04440, Q9TQE0, P01906, P01920, P13761, P13765	1504	21	18559	7.6389	2.6432e-05	3.77605e-06	1.96878e-05
GOTERM_BP_DIRECT	GO:0002504~antigen processing and presentation of peptide or polysaccharide antigen via MHC class II	12	0.780742	1.73135e-08	P06340, P79483, P13760, P20036, P04229, Q30154, P01909, Q30134, P01911, P01912, P01903, P04440, Q9TQE0, P01906, P01920, P13761, P13765	1475	17	16792	8.03605	6.93729e-05	1.50816e-06	3.21806e-05
GOTERM_BP_DIRECT	GO:0060333~interferon-gamma-mediated signaling pathway	24	1.56148	1.79351e-08	Q02556, P42224, P01892, P20036, P30443, Q30154, Q30134, P29728, P01911, P01912, P61769, Q9TQE0, P13761, P08631, P23497, P79483, P05362, P04229, P13760, P18462, P01909, Q05655, P01889, P01903, P04440, P01906, P32455, P01920, P16070, P30460, Q13557, P29590	1475	71	16792	3.84825	7.18632e-05	1.4972e-06	3.33358e-05
GOTERM_MF_DIRECT	GO:0032395~MHC class II receptor activity	11	0.71568	5.50094e-08	P06340, P79483, P13760, P20036, P04229, P01909, Q30134, P01911, P01912, P01903, P04440, P01906, P01920, P13761, P13765	1490	15	16881	8.30832	7.459e-05	4.14404e-06	9.02841e-05
GOTERM_CC_DIRECT	GO:0012507~ER to Golgi transport vesicle membrane	19	1.23617	8.51975e-08	P01892, P20036, P30443, Q30154, Q30134, Q9UEU0, P01911, P01912, P61769, Q9TQE0, P13761, P53992, P79483, P49755, P13760, P04229, P18462, P01909, P01889, P01903, O60763, P04440, P04233, P01906, Q15363, P01920, P30460	1511	52	18224	4.40686	7.00299e-05	1.94534e-06	0.000131244
GOTERM_BP_DIRECT	GO:0019882~antigen processing and presentation	19	1.23617	5.31129e-07	P01892, P61026, P20036, P30443, Q30154, Q30134, P61020, P01911, P01912, Q9TQE0, P28062, P13761, P20340, P25774, P79483, P04229, P13760, P18462, P01909, P01889, P01903, P04440, P04233, P01906, Q92930, P01920, P30460	1475	55	16792	3.9328	0.00212597	3.27416e-05	0.000987203
GOTERM_CC_DIRECT	GO:0030669~clathrin-coated endocytic vesicle membrane	15	0.975927	2.80944e-06	P79483, P20036, P04229, P13760, Q30154, P01909, Q9BXS5, Q30134, P01911, P01912, P01903, P04233, P04440, Q9TQE0, P01906, P01920, P13761, Q00610, Q10567, O43747	1511	41	18224	4.41252	0.0023067	5.02023e-05	0.00432778
UP_SEQ_FEATURE	region of interest:Beta-2	7	0.455433	4.57238e-06	P01911, P01912, P04440, P79483, Q9TQE0, P13760, P04229, P01920, Q30154, P13761, Q30134, P13765	1520	8	20063	11.5494	0.0177461	0.00127815	0.00847728
UP_SEQ_FEATURE	region of interest:Beta-1	7	0.455433	4.57238e-06	P01911, P01912, P04440, P79483, Q9TQE0, P13760, P04229, P01920, Q30154, P13761, Q30134, P13765	1520	8	20063	11.5494	0.0177461	0.00127815	0.00847728
KEGG_PATHWAY	hsa05416:Viral myocarditis	21	1.3663	7.39134e-06	P01892, P20036, P30443, Q30154, Q30134, P01911, P01912, Q9TQE0, P15153, P13761, P13765, P06340, P79483, P05362, P13760, P04229, Q04637, P18462, P01909, P01889, P63000, P99999, P01903, P04440, P01906, P01920, P42574, P55957, P30460	854	57	6910	2.98102	0.00200843	0.000118255	0.00972894
KEGG_PATHWAY	hsa04612:Antigen processing and presentation	25	1.62655	7.61602e-06	P01892, P20036, P30443, Q30154, Q03519, Q30134, P01911, P01912, P61769, P61289, Q9TQE0, P13761, P48382, P13765, P25774, P06340, Q9UL46, P27824, P79483, P04229, P13760, P18462, P01909, P01889, O15533, Q13952, P01903, P04233, P04440, P01906, P0DMV8, P01920, P30460	854	76	6910	2.66162	0.00206942	0.00011508	0.0100247
GOTERM_MF_DIRECT	GO:0042605~peptide antigen binding	12	0.780742	1.26671e-05	P79483, P01892, P13760, P20036, P04229, Q30154, P30443, P18462, P01909, Q30134, P01889, O15533, P01911, P01903, P01912, P04440, Q9TQE0, P01920, P13761, P30460	1490	28	16881	4.85551	0.01703	0.000686831	0.0207878
UP_SEQ_FEATURE	region of interest:Connecting peptide	12	0.780742	2.53154e-05	P06340, P01892, P13760, P20036, P04229, P30443, P18462, P01909, Q30134, P01889, P01911, P01903, P01912, P04440, P01906, P01920, P13761, P13765, P30460	1520	34	20063	4.65859	0.0943808	0.00494455	0.0469266
INTERPRO	IPR011162:MHC classes I/II-like antigen recognition protein	14	0.910865	3.81424e-05	P06340, P79483, P01892, P20036, P04229, P13760, P30443, Q30154, P18462, P01909, Q30134, P01889, P01911, P01912, P01903, P04440, Q9TQE0, P01906, P01920, P13761, P30460, P13765	1504	45	18559	3.83904	0.0858062	0.00389295	0.0667991
INTERPRO	IPR003006:Immunoglobulin/major histocompatibility complex, conserved site	16	1.04099	6.40462e-05	P06340, P79483, P01892, P20036, P04229, P13760, P30443, Q30154, P18462, P01909, Q30134, P01889, P01911, P01912, P01903, P61769, P04440, Q9TQE0, P01906, P01859, P01920, P13761, P30460, P13765	1504	60	18559	3.2906	0.139844	0.00625707	0.112141
PFAM	PF07654:Immunoglobulin C1-set domain	17	1.10605	6.96223e-05	P06340, P79483, P01892, P20036, P04229, P13760, P30443, Q30154, P18462, P01909, Q30134, P01889, O15533, P01911, P01912, P01903, P61769, P04440, Q9TQE0, P01906, P01859, P01920, P13761, P30460, P13765	1444	66	17475	3.11713	0.0834788	0.0108371	0.11309
KEGG_PATHWAY	hsa05332:Graft-versus-host disease	14	0.910865	7.51829e-05	P06340, P79483, P01892, P20036, P04229, P13760, P30443, Q30154, P18462, P01909, Q30134, P01889, P01911, P01912, P01903, P04440, Q9TQE0, P01906, P01920, P13761, P30460, P13765	854	33	6910	3.43269	0.0202428	0.000929137	0.0989196
INTERPRO	IPR000353:MHC class II, beta chain, N-terminal	8	0.520494	8.10343e-05	P79483, P01892, P13760, P04229, Q30154, P30443, P18462, Q30134, P01911, P01912, P04440, Q9TQE0, P01920, P13761, P13765	1504	15	18559	6.58121	0.173537	0.00759503	0.141866
INTERPRO	IPR003597:Immunoglobulin C1-set	17	1.10605	8.13772e-05	P06340, P79483, P01892, P20036, P04229, P13760, P30443, Q30154, P18462, P01909, Q30134, P01889, O15533, P01911, P01912, P01903, P61769, P04440, Q9TQE0, P01906, P01859, P01920, P13761, P30460, P13765	1504	68	18559	3.08494	0.174203	0.00733477	0.142466
PFAM	PF00969:Class II histocompatibility antigen, beta domain	8	0.520494	9.17209e-05	P79483, P01892, P13760, P04229, Q30154, P30443, P18462, Q30134, P01911, P01912, P04440, Q9TQE0, P01920, P13761, P13765	1444	15	17475	6.45429	0.108491	0.0126789	0.148961
KEGG_PATHWAY	hsa05330:Allograft rejection	14	0.910865	0.00029116	P06340, P79483, P01892, P20036, P04229, P13760, P30443, Q30154, P18462, P01909, Q30134, P01889, P01911, P01912, P01903, P04440, Q9TQE0, P01906, P01920, P13761, P30460, P13765	854	37	6910	3.06159	0.0761514	0.00329486	0.382582
KEGG_PATHWAY	hsa04145:Phagosome	35	2.27716	0.000389813	O15400, P13473, P01892, P20036, P30443, Q30154, Q03519, Q30134, P61020, P01911, P01912, Q13409, Q9TQE0, P68366, Q9BQE3, P13761, P13765, P25774, P06340, P27824, O75348, P79483, P02786, P04229, P13760, P18462, P01909, P01889, P51149, P21281, P51148, P63000, P20645, P01903, P04440, P04839, P20339, P01906, P61421, P60468, Q14204, P01920, P30460	854	153	6910	1.85096	0.10062	0.00392006	0.511904
GOTERM_CC_DIRECT	GO:0032588~trans-Golgi network membrane	18	1.17111	0.000393334	P79483, P20036, P13760, P04229, Q30154, P01909, Q9BXS5, Q30134, P01911, P20645, P01912, P01903, P04233, P04440, Q9TQE0, P01906, P01920, P13761, Q00610, Q10567, P20340, O43747, O43493	1511	83	18224	2.61561	0.276304	0.00384241	0.604207
KEGG_PATHWAY	hsa05310:Asthma	12	0.780742	0.000559477	P06340, P79483, P13760, P20036, P04229, Q30154, P01909, Q30134, P01911, P01912, P01903, P04440, Q9TQE0, P01906, P01920, P13761, P13765	854	30	6910	3.23653	0.141201	0.00506116	0.733951
INTERPRO	IPR001003:MHC class II, alpha chain, N-terminal	5	0.325309	0.000562557	P01903, P06340, P01906, P20036, P01909	1504	6	18559	10.2831	0.7338	0.0381788	0.980955
PFAM	PF00993:Class II histocompatibility antigen, alpha domain	5	0.325309	0.000606335	P01903, P06340, P01906, P20036, P01909	1444	6	17475	10.0848	0.532035	0.0527953	0.980873
UP_SEQ_FEATURE	region of interest:Alpha-1	7	0.455433	0.000769454	P01903, P06340, P01906, P01892, P20036, P30443, P18462, P01909, P01889, P30460	1520	16	20063	5.77471	0.950922	0.0872961	1.41705
UP_SEQ_FEATURE	region of interest:Alpha-2	7	0.455433	0.000769454	P01903, P06340, P01906, P01892, P20036, P30443, P18462, P01909, P01889, P30460	1520	16	20063	5.77471	0.950922	0.0872961	1.41705
GOTERM_CC_DIRECT	GO:0030658~transport vesicle membrane	11	0.71568	0.00081099	P79483, P13760, P20036, P04229, Q30154, P01909, Q30134, P01911, P01912, P01903, P04440, P04233, Q9TQE0, P01906, P01920, P13761	1511	38	18224	3.49131	0.486705	0.00738266	1.24204
KEGG_PATHWAY	hsa04940:Type I diabetes mellitus	14	0.910865	0.00115725	P06340, P79483, P01892, P20036, P04229, P13760, P30443, Q30154, P18462, P01909, Q30134, P01889, P01911, P01912, P01903, P04440, Q9TQE0, P01906, P01920, P13761, P30460, P13765	854	42	6910	2.69711	0.270177	0.00979402	1.51263
KEGG_PATHWAY	hsa05152:Tuberculosis	37	2.40729	0.00150785	P42224, P13473, P20036, Q08209, Q30154, Q30134, P61020, P62158, P01911, P01912, Q9TQE0, P43405, P28482, P13761, P13765, P48382, P63098, P25774, P06340, P79483, P13760, P04229, P01909, P27361, P19838, P51149, Q13952, P51148, P99999, P01903, P04233, P04440, P20339, P01906, P61421, Q07812, P61586, P01920, P42574, P55957, Q13557, P45983	854	177	6910	1.69141	0.336644	0.0119993	1.96671
KEGG_PATHWAY	hsa05145:Toxoplasmosis	27	1.75667	0.00206884	P09917, P42224, P20036, Q30154, P30405, Q30134, P04899, P01911, P01912, P27986, Q9TQE0, P28482, P13761, P63096, P13765, P08754, P06340, P79483, P04229, P13760, P01909, P27361, P19838, P99999, P01903, P04440, P01906, P0DMV8, P01920, P42574, P40763, P45983	854	118	6910	1.85141	0.430678	0.0155257	2.68926
GOTERM_BP_DIRECT	GO:0032673~regulation of interleukin-4 production	4	0.260247	0.00252301	P01911, P01912, Q9TQE0, O00182, P13760, P04229, Q30154, P13761, Q30134	1475	4	16792	11.3844	0.99996	0.0766108	4.5869
GOTERM_BP_DIRECT	GO:0031295~T cell costimulation	16	1.04099	0.0029114	P79483, P60953, P20036, P04229, P13760, P41240, Q30154, P01909, Q13177, Q30134, P63000, P01911, P01912, P01903, P04440, P27986, Q9TQE0, P01906, P01920, P13761, P07948	1475	78	16792	2.33526	0.999992	0.0859493	5.27507
KEGG_PATHWAY	hsa05164:Influenza A	35	2.27716	0.00398291	P42224, P17252, P20036, Q30154, Q9ULZ3, P25685, Q30134, P29728, P35030, P01911, P14324, P01912, P27986, Q9TQE0, P20591, P28482, P13761, Q9BUJ2, P13765, P06340, P79483, P05362, P04229, P13760, P01909, P27361, P05771, P19838, P52948, Q13838, P99999, P01903, P04440, P01906, O14980, P0DMV8, P01920, P05198, P45983, P29590	854	174	6910	1.62757	0.662272	0.0274499	5.11766
GOTERM_BP_DIRECT	GO:0002381~immunoglobulin production involved in immunoglobulin mediated immune response	4	0.260247	0.00589496	P01911, P01912, Q9TQE0, P13760, P04229, P01920, Q30154, P13761, Q30134	1475	5	16792	9.10753	1	0.1517	10.4071
UP_KEYWORDS	Lysosome	32	2.08198	0.00738926	Q6IAA8, P13473, Q969J3, P20036, Q30154, Q30134, Q9UEU0, Q96RU3, P01911, Q9HB90, P01912, P17900, Q9TQE0, Q9NUM4, Q9BV40, P10253, P08631, P13761, P13765, P25774, P78537, P06340, O14773, P79483, P04229, P13760, Q9Y2Q5, P01909, P51149, P20645, P01903, P04233, P04440, Q13510, P01906, Q0VGL1, P01920	1532	263	20581	1.63456	0.970705	0.0336945	10.0633
GOTERM_CC_DIRECT	GO:0030666~endocytic vesicle membrane	13	0.845804	0.00742212	P79483, P20036, P04229, P13760, Q30154, P01909, Q30134, P01911, P01912, P01903, P62979, P04233, P04440, Q9TQE0, P01906, P01920, P13761, Q13557	1511	66	18224	2.37563	0.99781	0.0532083	10.8422
KEGG_PATHWAY	hsa05320:Autoimmune thyroid disease	14	0.910865	0.00894355	P06340, P79483, P01892, P20036, P04229, P13760, P30443, Q30154, P18462, P01909, Q30134, P01889, P01911, P01912, P01903, P04440, Q9TQE0, P01906, P01920, P13761, P30460, P13765	854	52	6910	2.17844	0.913151	0.0517352	11.1531
KEGG_PATHWAY	hsa05140:Leishmaniasis	17	1.10605	0.0113165	P06340, P79483, P42224, P20036, P13760, P04229, Q30154, P01909, P27361, P19838, P49006, Q30134, P01911, P01912, P01903, P04440, Q9TQE0, P01906, P01920, P28482, P13761, P13765	854	71	6910	1.93736	0.954754	0.0624568	13.9129
GOTERM_BP_DIRECT	GO:0002455~humoral immune response mediated by circulating immunoglobulin	4	0.260247	0.0180396	P01911, P01912, Q9TQE0, P13760, P04229, P01920, Q30154, P13761, Q30134	1475	7	16792	6.50538	1	0.336218	28.7064
GOTERM_BP_DIRECT	GO:2001179~regulation of interleukin-10 secretion	3	0.195185	0.0217514	P01911, P01912, Q9TQE0, P13760, P04229, Q30154, P13761, Q30134	1475	3	16792	11.3844	1	0.380543	33.5522
KEGG_PATHWAY	hsa05321:Inflammatory bowel disease (IBD)	15	0.975927	0.0220536	P06340, P42224, P79483, P20036, P04229, P13760, Q30154, P01909, P19838, Q30134, P01911, P01912, P01903, P04440, Q9TQE0, P01906, P01920, P13761, P13765, P40763	854	64	6910	1.89641	0.997679	0.108141	25.4384
GOTERM_BP_DIRECT	GO:0016045~detection of bacterium	5	0.325309	0.0221914	P01892, P13760, P04229, P30443, Q30154, P18462, Q30134, P01889, P01911, P01912, Q9TQE0, P13761, P30460	1475	13	16792	4.37862	1	0.38335	34.1055
KEGG_PATHWAY	hsa04672:Intestinal immune network for IgA production	12	0.780742	0.0251302	P06340, P79483, P13760, P20036, P04229, Q30154, P01909, Q30134, P01911, P01912, P01903, P04440, Q9TQE0, P01906, P01920, P13761, P13765	854	47	6910	2.06587	0.999015	0.120322	28.4677
KEGG_PATHWAY	hsa05150:Staphylococcus aureus infection	13	0.845804	0.0291305	P06340, P79483, P05362, P20036, P04229, P13760, Q30154, P01909, Q30134, P01911, P01912, P01903, P04440, Q9TQE0, P01906, P01920, P13761, P13765	854	54	6910	1.94791	0.999678	0.125427	32.2365
GOTERM_BP_DIRECT	GO:0002437~inflammatory response to antigenic stimulus	5	0.325309	0.0368114	P01911, P01912, Q9TQE0, P26583, P13760, P04229, Q30154, P13761, Q30134, P09429	1475	15	16792	3.7948	1	0.507815	50.1985
Annotation Cluster 31	Nucleus
Category	Term	Count	%	PValue	Genes	List Total	Pop Hits	Pop Total	Fold Enrichment	Bonferroni	Benjamini	FDR
GOTERM_BP_DIRECT	GO:0043044~ATP-dependent chromatin remodeling	12	0.780742	1.1505e-06	Q13547, Q9UBB5, Q09028, Q12824, Q8TAQ2, O94776, Q969G3, Q92922, Q8WXI9, O96019, O60264, P51532	1475	23	16792	5.93969	0.00459946	6.88046e-05	0.00213841
GOTERM_BP_DIRECT	GO:0006338~chromatin remodeling	21	1.3663	4.21343e-05	P06400, P51531, Q8TAQ2, Q12824, P11387, Q13185, O60264, O96019, O60885, Q969P6, P51532, Q9NRG0, Q13547, Q9H6W3, P35659, O00267, Q09028, Q969G3, Q92922, P63272, Q9UER7	1475	86	16792	2.77991	0.155352	0.00208222	0.0782858
GOTERM_CC_DIRECT	GO:0016514~SWI/SNF complex	8	0.520494	9.3789e-05	P06400, P51531, Q12824, Q8TAQ2, Q969G3, Q92922, O96019, P51532	1511	15	18224	6.43247	0.0742011	0.00118542	0.144382
GOTERM_CC_DIRECT	GO:0071564~npBAF complex	7	0.455433	0.000191095	P51531, Q12824, Q8TAQ2, Q969G3, Q92922, O96019, P51532	1511	12	18224	7.03552	0.145377	0.00214967	0.293972
GOTERM_BP_DIRECT	GO:0006337~nucleosome disassembly	8	0.520494	0.000349623	Q01105, Q12824, Q8TAQ2, Q969G3, Q92922, P17096, Q9Y5B9, P51532	1475	17	16792	5.35737	0.753695	0.0136432	0.64785
GOTERM_MF_DIRECT	GO:0031492~nucleosomal DNA binding	12	0.780742	0.00179032	Q13547, Q9UBB5, Q09028, Q12824, Q8TAQ2, P18754, O94776, Q969G3, Q92922, Q8WXI9, O96019, P51532	1490	46	16881	2.95553	0.91195	0.0448113	2.89817
GOTERM_CC_DIRECT	GO:0000790~nuclear chromatin	29	1.88679	0.00255707	P51531, Q9UBB5, P42224, P52701, O75376, P41223, Q8N163, O14929, P51532, Q13547, Q09028, P49459, Q92922, Q92878, Q92785, Q8TAQ2, Q12824, P18754, O96019, Q15910, P16402, P26583, O94776, Q969G3, Q9NVP2, Q8WXI9, Q13112, Q7Z3K3, P40763	1511	193	18224	1.81226	0.878106	0.0206221	3.86738
GOTERM_CC_DIRECT	GO:0071565~nBAF complex	6	0.390371	0.00411327	P51531, Q12824, Q8TAQ2, Q969G3, Q92922, P51532	1511	14	18224	5.16895	0.966227	0.0317524	6.15207
GOTERM_MF_DIRECT	GO:0000980~RNA polymerase II distal enhancer sequence-specific DNA binding	13	0.845804	0.010577	Q99626, Q13547, Q9UBB5, Q09028, Q12824, Q8TAQ2, O94776, Q969G3, Q92922, P19838, Q8WXI9, O96019, P51532	1490	65	16881	2.26591	0.999999	0.181484	16.014
Annotation Cluster 32	Annexin
Category	Term	Count	%	PValue	Genes	List Total	Pop Hits	Pop Total	Fold Enrichment	Bonferroni	Benjamini	FDR
UP_KEYWORDS	Annexin	7	0.455433	0.00029907	P07355, P04083, P09525, P50995, P08758, P20073, P08133	1532	14	20581	6.71704	0.132707	0.00197553	0.426845
UP_KEYWORDS	Calcium/phospholipid-binding	7	0.455433	0.000467147	P07355, P04083, P09525, P50995, P08758, P20073, P08133	1532	15	20581	6.26923	0.199416	0.00288433	0.665986
INTERPRO	IPR001464:Annexin	7	0.455433	0.000474663	P07355, P04083, P09525, P50995, P08758, P20073, P08133	1504	14	18559	6.16988	0.672633	0.0332724	0.828291
INTERPRO	IPR018252:Annexin repeat, conserved site	7	0.455433	0.000474663	P07355, P04083, P09525, P50995, P08758, P20073, P08133	1504	14	18559	6.16988	0.672633	0.0332724	0.828291
INTERPRO	IPR018502:Annexin repeat	7	0.455433	0.000474663	P07355, P04083, P09525, P50995, P08758, P20073, P08133	1504	14	18559	6.16988	0.672633	0.0332724	0.828291
UP_SEQ_FEATURE	repeat:Annexin 2	7	0.455433	0.000513683	P07355, P04083, P09525, P50995, P08758, P20073, P08133	1520	15	20063	6.15969	0.866292	0.0693394	0.948136
UP_SEQ_FEATURE	repeat:Annexin 1	7	0.455433	0.000513683	P07355, P04083, P09525, P50995, P08758, P20073, P08133	1520	15	20063	6.15969	0.866292	0.0693394	0.948136
UP_SEQ_FEATURE	repeat:Annexin 4	7	0.455433	0.000513683	P07355, P04083, P09525, P50995, P08758, P20073, P08133	1520	15	20063	6.15969	0.866292	0.0693394	0.948136
UP_SEQ_FEATURE	repeat:Annexin 3	7	0.455433	0.000513683	P07355, P04083, P09525, P50995, P08758, P20073, P08133	1520	15	20063	6.15969	0.866292	0.0693394	0.948136
PFAM	PF00191:Annexin	7	0.455433	0.000527132	P07355, P04083, P09525, P50995, P08758, P20073, P08133	1444	14	17475	6.0509	0.483223	0.0495125	0.85326
GOTERM_MF_DIRECT	GO:0048306~calcium-dependent protein binding	12	0.780742	0.0115384	P07355, P63027, P04083, P09525, P50995, Q9NW64, O75131, P31949, O75340, Q9H9H4, P20073, P08133	1490	58	16881	2.34404	1	0.189276	17.3434
Annotation Cluster 33	Glycolysis
Category	Term	Count	%	PValue	Genes	List Total	Pop Hits	Pop Total	Fold Enrichment	Bonferroni	Benjamini	FDR
GOTERM_BP_DIRECT	GO:0006096~glycolytic process	12	0.780742	9.83641e-05	P09972, P07738, P36871, P13929, P00338, O14556, P09104, P06744, Q02218, P19367, Q2TB90, P17858	1475	34	16792	4.01803	0.325757	0.00462649	0.182671
UP_KEYWORDS	Glycolysis	10	0.650618	0.000305822	P09972, P07738, P13929, O14556, P09104, P06744, Q02218, P19367, Q2TB90, P17858	1532	31	20581	4.33357	0.135491	0.00199245	0.436462
KEGG_PATHWAY	hsa00010:Glycolysis / Gluconeogenesis	17	1.10605	0.0063633	P00338, P06744, P11766, P09622, P19367, Q2TB90, P05091, P17858, P09972, P07738, P36871, P13929, P49189, Q96G03, P14550, O14556, P09104	854	67	6910	2.05303	0.823837	0.0386939	8.05955
GOTERM_BP_DIRECT	GO:0006094~gluconeogenesis	10	0.650618	0.0128398	P09972, P07738, P53007, P36871, P13929, P17174, O14556, P00505, P09104, P06744	1475	44	16792	2.58737	1	0.267975	21.3527
GOTERM_BP_DIRECT	GO:0061621~canonical glycolysis	7	0.455433	0.0225794	P09972, P13929, O14556, P09104, P06744, P19367, P17858	1475	26	16792	3.06503	1	0.385391	34.5899
Annotation Cluster 34	Chromatin regulator
Category	Term	Count	%	PValue	Genes	List Total	Pop Hits	Pop Total	Fold Enrichment	Bonferroni	Benjamini	FDR
GOTERM_BP_DIRECT	GO:0006338~chromatin remodeling	21	1.3663	4.21343e-05	P06400, P51531, Q8TAQ2, Q12824, P11387, Q13185, O60264, O96019, O60885, Q969P6, P51532, Q9NRG0, Q13547, Q9H6W3, P35659, O00267, Q09028, Q969G3, Q92922, P63272, Q9UER7	1475	86	16792	2.77991	0.155352	0.00208222	0.0782858
GOTERM_BP_DIRECT	GO:0016569~covalent chromatin modification	18	1.17111	0.0195156	P06400, Q9BTT0, P26358, Q8TAQ2, Q12824, O75376, Q13185, O60264, O60885, P51532, P35659, P46379, Q8IXM2, Q969G3, Q92922, Q9NVP2, Q9UER7, Q13422	1475	113	16792	1.81345	1	0.353583	30.6721
UP_KEYWORDS	Chromatin regulator	32	2.08198	0.0236891	Q9BTT0, P26358, O75376, Q13185, P51610, O15047, P51532, Q13547, P46736, Q09028, P49459, P46379, Q8IXM2, Q92922, Q13422, P06400, O95619, O15294, Q8TAQ2, Q12824, P05771, Q15291, O96019, O60264, O60885, Q9H6W3, P35659, Q15910, Q969G3, Q9NVP2, Q9UER7, P61964	1532	287	20581	1.49788	0.999989	0.0929303	29.0255
Annotation Cluster 35	HEAT
Category	Term	Count	%	PValue	Genes	List Total	Pop Hits	Pop Total	Fold Enrichment	Bonferroni	Benjamini	FDR
UP_SEQ_FEATURE	repeat:HEAT 5	11	0.71568	0.000190574	Q9BPX3, Q14974, Q9UBF2, Q92973, O75122, O14980, Q92616, O75533, Q6KC79, Q86VP6, O00410	1520	35	20063	4.14836	0.525911	0.0294131	0.352752
UP_SEQ_FEATURE	repeat:HEAT 4	12	0.780742	0.000270247	Q9BPX3, Q14974, Q9UBF2, Q92973, Q9Y678, O75122, O14980, Q92616, O75533, Q6KC79, Q86VP6, O00410	1520	43	20063	3.68354	0.653001	0.0398915	0.499878
UP_SEQ_FEATURE	repeat:HEAT 3	12	0.780742	0.00107553	Q9BPX3, Q14974, Q9UBF2, Q92973, Q9Y678, O75122, O14980, Q92616, O75533, Q6KC79, Q86VP6, O00410	1520	50	20063	3.16784	0.985214	0.107647	1.97544
UP_SEQ_FEATURE	repeat:HEAT 2	13	0.845804	0.00115329	Q9BPX3, Q14974, Q92973, Q92616, O75533, Q6KC79, P78527, Q86VP6, Q9Y678, Q9UBF2, O14980, O75122, O00410	1520	58	20063	2.95847	0.989099	0.112119	2.11681
UP_SEQ_FEATURE	repeat:HEAT 1	13	0.845804	0.00115329	Q9BPX3, Q14974, Q92973, Q92616, O75533, Q6KC79, P78527, Q86VP6, Q9Y678, Q9UBF2, O14980, O75122, O00410	1520	58	20063	2.95847	0.989099	0.112119	2.11681
UP_SEQ_FEATURE	repeat:HEAT 6	9	0.585556	0.00137281	Q9BPX3, Q14974, Q9UBF2, Q92973, O14980, Q92616, O75533, Q86VP6, O00410	1520	30	20063	3.9598	0.99539	0.125839	2.5149
UP_SEQ_FEATURE	repeat:HEAT 8	7	0.455433	0.00214057	Q9BPX3, Q14974, Q92973, O14980, Q92616, O75533, Q86VP6	1520	19	20063	4.86292	0.999773	0.170122	3.89518
INTERPRO	IPR011989:Armadillo-like helical	32	2.08198	0.00248877	Q14974, Q92797, Q9UIA9, O75533, Q99460, Q9H583, Q14669, Q6ZS81, Q9UBB4, Q86VP6, P78527, Q9Y376, Q9Y678, O75122, Q92600, O43747, Q9H3U1, Q9BPX3, Q92973, Q9BZZ5, Q92616, Q29RF7, Q6KC79, Q8WYA6, O00505, Q92556, Q15021, Q9UBF2, O14980, Q10567, P53618, O00410	1504	225	18559	1.75499	0.997151	0.119628	4.2715
UP_SEQ_FEATURE	repeat:HEAT 7	7	0.455433	0.00766274	Q9BPX3, Q14974, Q92973, O14980, Q92616, O75533, Q86VP6	1520	24	20063	3.84981	1	0.399839	13.2918
UP_SEQ_FEATURE	repeat:HEAT 10	5	0.325309	0.0227341	Q9BPX3, O14980, Q92616, O75533, Q86VP6	1520	15	20063	4.39978	1	0.699023	34.7129
UP_SEQ_FEATURE	repeat:HEAT 9	5	0.325309	0.0227341	Q9BPX3, O14980, Q92616, O75533, Q86VP6	1520	15	20063	4.39978	1	0.699023	34.7129
Annotation Cluster 36	snRNP
Category	Term	Count	%	PValue	Genes	List Total	Pop Hits	Pop Total	Fold Enrichment	Bonferroni	Benjamini	FDR
GOTERM_CC_DIRECT	GO:0005685~U1 snRNP	10	0.650618	7.7201e-06	P62314, P62316, Q9NQ29, P09012, Q9Y383, O75400, P62306, P08621, O95232, P14678	1511	19	18224	6.34784	0.00632585	0.000129501	0.0118919
GOTERM_CC_DIRECT	GO:0030532~small nuclear ribonucleoprotein complex	8	0.520494	0.000244407	Q15428, P62312, P62314, P62316, P62306, Q15393, P09661, P14678	1511	17	18224	5.67571	0.182028	0.00257267	0.37584
GOTERM_CC_DIRECT	GO:0005687~U4 snRNP	6	0.390371	0.00117174	P62314, Q8WWY3, P62316, P62306, Q13838, P14678	1511	11	18224	6.57867	0.618536	0.0105346	1.78989
GOTERM_CC_DIRECT	GO:0034709~methylosome	6	0.390371	0.00187221	P84090, P62314, P62316, P62306, Q99873, P14678	1511	12	18224	6.03044	0.785704	0.016084	2.84552
GOTERM_BP_DIRECT	GO:0000387~spliceosomal snRNP assembly	9	0.585556	0.00217616	Q15020, O43290, P62314, Q9Y3F4, P62316, Q9NW64, P62306, Q9Y4Z0, P14678	1475	28	16792	3.65927	0.999838	0.0674524	3.96834
GOTERM_CC_DIRECT	GO:0034719~SMN-Sm protein complex	5	0.325309	0.0467129	P62314, Q9Y3F4, P62316, P62306, P14678	1511	17	18224	3.54732	1	0.234717	52.1429
Annotation Cluster 37	Mitochondrion
Category	Term	Count	%	PValue	Genes	List Total	Pop Hits	Pop Total	Fold Enrichment	Bonferroni	Benjamini	FDR
GOTERM_BP_DIRECT	GO:0006122~mitochondrial electron transport, ubiquinol to cytochrome c	9	0.585556	1.2684e-05	P99999, O14949, P08574, P51608, P14927, P00156, P07919, O75439, Q9UDW1	1475	15	16792	6.83064	0.0495553	0.000651394	0.0235731
GOTERM_CC_DIRECT	GO:0005750~mitochondrial respiratory chain complex III	7	0.455433	0.000330018	O14949, P08574, P14927, P00156, P07919, O75439, Q9UDW1	1511	13	18224	6.49432	0.237627	0.00338575	0.507178
GOTERM_MF_DIRECT	GO:0008121~ubiquinol-cytochrome-c reductase activity	5	0.325309	0.00820302	O14949, P14927, P00156, P07919, Q9UDW1	1490	10	16881	5.66477	0.999986	0.15355	12.6448
GOTERM_BP_DIRECT	GO:1902600~hydrogen ion transmembrane transport	11	0.71568	0.0385905	P13073, P14406, O14949, O75348, P14927, P09669, P07919, P00167, O00483, Q9UDW1, Q13423	1475	61	16792	2.05293	1	0.519758	51.8807
Annotation Cluster 38	Chaperone
Category	Term	Count	%	PValue	Genes	List Total	Pop Hits	Pop Total	Fold Enrichment	Bonferroni	Benjamini	FDR
GOTERM_BP_DIRECT	GO:1904874~positive regulation of telomerase RNA localization to Cajal body	8	0.520494	0.000135382	P49368, O60832, P40227, Q9NX24, P78371, P48643, P50990, P50991	1475	15	16792	6.07168	0.418714	0.00600978	0.251334
GOTERM_BP_DIRECT	GO:1904871~positive regulation of protein localization to Cajal body	6	0.390371	0.000231231	P49368, P40227, P78371, P48643, P50990, P50991	1475	8	16792	8.53831	0.604122	0.00960616	0.428915
INTERPRO	IPR002194:Chaperonin TCP-1, conserved site	6	0.390371	0.000330461	P49368, P40227, P78371, P48643, P50990, P50991	1504	9	18559	8.22651	0.540388	0.0255796	0.577343
GOTERM_CC_DIRECT	GO:0005832~chaperonin-containing T-complex	6	0.390371	0.000368043	P49368, P40227, P78371, P48643, P50990, P50991	1511	9	18224	8.04059	0.261096	0.00368328	0.56546
GOTERM_BP_DIRECT	GO:1904851~positive regulation of establishment of protein localization to telomere	6	0.390371	0.000482584	O60832, P40227, P78371, P48643, P50990, P50991	1475	9	16792	7.5896	0.855457	0.0182521	0.89318
GOTERM_BP_DIRECT	GO:1901998~toxin transport	11	0.71568	0.000799768	Q05193, P49368, P31689, P78371, Q9UJY5, P48643, P61923, Q8WVM8, P50990, P35606, P50991	1475	36	16792	3.47857	0.95948	0.0287244	1.47612
GOTERM_BP_DIRECT	GO:0032212~positive regulation of telomere maintenance via telomerase	10	0.650618	0.00131776	Q13315, P49368, O60832, P40227, P78371, P48643, P28482, P50990, P27361, P50991	1475	32	16792	3.55763	0.994927	0.0441556	2.42114
INTERPRO	IPR017998:Chaperone tailless complex polypeptide 1 (TCP-1)	6	0.390371	0.00168928	P49368, P40227, P78371, P48643, P50990, P50991	1504	12	18559	6.16988	0.98125	0.0903359	2.91846
INTERPRO	IPR027410:TCP-1-like chaperonin intermediate domain	6	0.390371	0.00168928	P49368, P40227, P78371, P48643, P50990, P50991	1504	12	18559	6.16988	0.98125	0.0903359	2.91846
GOTERM_CC_DIRECT	GO:0002199~zona pellucida receptor complex	5	0.325309	0.00421182	P49368, P78371, P48643, P50990, P50991	1511	9	18224	6.70049	0.968865	0.0322006	6.29503
INTERPRO	IPR027413:GroEL-like equatorial domain	6	0.390371	0.00521651	P49368, P40227, P78371, P48643, P50990, P50991	1504	15	18559	4.9359	0.999995	0.210665	8.75529
INTERPRO	IPR002423:Chaperonin Cpn60/TCP-1	6	0.390371	0.00708814	P49368, P40227, P78371, P48643, P50990, P50991	1504	16	18559	4.62741	1	0.266426	11.7165
INTERPRO	IPR027409:GroEL-like apical domain	6	0.390371	0.00708814	P49368, P40227, P78371, P48643, P50990, P50991	1504	16	18559	4.62741	1	0.266426	11.7165
PFAM	PF00118:TCP-1/cpn60 chaperonin family	6	0.390371	0.00769264	P49368, P40227, P78371, P48643, P50990, P50991	1444	16	17475	4.53818	0.999937	0.331588	11.7948
Annotation Cluster 39	Iron-sulfur
Category	Term	Count	%	PValue	Genes	List Total	Pop Hits	Pop Total	Fold Enrichment	Bonferroni	Benjamini	FDR
UP_KEYWORDS	Iron-sulfur	15	0.975927	0.000100551	P19404, Q8N5K1, P49821, P21912, P49643, Q9Y5Y2, Q6FI81, P28340, P53384, P28331, Q9NZ45, O76003, Q86U28, O75251, O75306	1532	60	20581	3.35852	0.0467373	0.000771714	0.1437
UP_KEYWORDS	4Fe-4S	9	0.585556	0.00507794	P49821, P28340, P21912, P28331, P53384, Q9Y5Y2, P49643, O75251, O75306	1532	37	20581	3.26775	0.911368	0.0251854	7.02166
GOTERM_MF_DIRECT	GO:0051539~4 iron, 4 sulfur cluster binding	10	0.650618	0.00974917	P49821, P28340, P21912, P28331, P53384, Q9Y5Y2, P49643, Q86U28, O75251, O75306	1490	42	16881	2.69751	0.999998	0.170647	14.8532
UP_SEQ_FEATURE	metal ion-binding site:Iron-sulfur (4Fe-4S)	5	0.325309	0.0351404	P49821, Q9Y5Y2, P49643, O75251, O75306	1520	17	20063	3.88216	1	0.800149	48.483
Annotation Cluster 40	Succinyl metabolic process
Category	Term	Count	%	PValue	Genes	List Total	Pop Hits	Pop Total	Fold Enrichment	Bonferroni	Benjamini	FDR
GOTERM_BP_DIRECT	GO:0006105~succinate metabolic process	7	0.455433	6.97498e-05	P31040, P51649, P21912, P53597, Q96I99, P42229, Q9P2R7	1475	10	16792	7.96908	0.243836	0.00336177	0.129564
INTERPRO	IPR005811:ATP-citrate lyase/succinyl-CoA ligase	4	0.260247	0.00199211	P53597, Q96I99, P53396, Q9P2R7	1504	4	18559	12.3398	0.990814	0.103335	3.43307
INTERPRO	IPR016102:Succinyl-CoA synthetase-like	4	0.260247	0.00199211	P53597, Q96I99, P53396, Q9P2R7	1504	4	18559	12.3398	0.990814	0.103335	3.43307
PFAM	PF00549:CoA-ligase	4	0.260247	0.00210896	P53597, Q96I99, P53396, Q9P2R7	1444	4	17475	12.1018	0.928867	0.143998	3.37291
GOTERM_BP_DIRECT	GO:0006104~succinyl-CoA metabolic process	4	0.260247	0.00589496	P53597, Q96I99, Q02218, Q9P2R7	1475	5	16792	9.10753	1	0.1517	10.4071
INTERPRO	IPR017866:Succinyl-CoA synthetase, beta subunit, conserved site	3	0.195185	0.0186033	Q96I99, P53396, Q9P2R7	1504	3	18559	12.3398	1	0.472762	28.0338
KEGG_PATHWAY	hsa00640:Propanoate metabolism	8	0.520494	0.0492289	Q6NVY1, Q9NTX5, P30084, P53597, P40939, P00338, Q96I99, Q9P2R7	854	28	6910	2.31181	0.999999	0.187831	48.5472
Annotation Cluster 41	WD repeat
Category	Term	Count	%	PValue	Genes	List Total	Pop Hits	Pop Total	Fold Enrichment	Bonferroni	Benjamini	FDR
INTERPRO	IPR020472:G-protein beta WD-40 repeat	19	1.23617	0.000421784	Q6UXN9, O43684, Q8IWB7, Q9GZS3, Q9Y3F4, Q2TAY7, P35606, P43034, O43815, P53621, Q09028, Q96DI7, P62879, Q12788, P57737, P63244, P61964, Q96J01, Q9HAV0	1504	93	18559	2.52103	0.629257	0.0305319	0.736339
UP_SEQ_FEATURE	repeat:WD 4	35	2.27716	0.000903332	Q9C0J8, Q9ULV4, Q8WZ42, Q2TAY7, P35606, P43034, Q9HC35, Q8NFH4, Q6ZS81, P53621, Q09028, Q13409, P62879, Q12788, Q96J01, Q9HAV0, Q6UXN9, Q969X6, Q8IWB7, O43684, Q9GZS3, Q9Y3F4, O15143, Q86W42, Q15291, P55884, O43815, Q13347, Q6P2E9, Q96DI7, Q15061, P57737, P63244, Q13112, P61964	1520	255	20063	1.81167	0.970959	0.0961715	1.66166
UP_SEQ_FEATURE	repeat:WD 6	28	1.82173	0.0018066	Q8WZ42, Q9C0J8, Q2TAY7, P35606, P43034, Q9HC35, P53621, Q09028, Q13409, P62879, Q12788, Q96J01, Q9HAV0, Q6UXN9, Q969X6, Q8IWB7, Q9GZS3, Q9Y3F4, O15143, Q86W42, Q15291, O43815, Q96DI7, Q15061, P57737, P63244, Q13112, P61964	1520	196	20063	1.88562	0.999159	0.15515	3.29706
UP_SEQ_FEATURE	repeat:WD 5	32	2.08198	0.00201612	Q9C0J8, Q8WZ42, Q2TAY7, P35606, P43034, Q9HC35, Q6ZS81, P53621, Q09028, Q13409, P62879, Q12788, Q96J01, Q9HAV0, Q6UXN9, Q969X6, Q8IWB7, O43684, Q9GZS3, Q9Y3F4, O15143, Q86W42, Q15291, P55884, O43815, Q13347, Q96DI7, Q15061, P57737, P63244, Q13112, P61964	1520	237	20063	1.78219	0.99963	0.164409	3.67271
UP_SEQ_FEATURE	repeat:WD 3	35	2.27716	0.0022509	Q9C0J8, Q9ULV4, Q8WZ42, Q2TAY7, P35606, P43034, Q9HC35, Q8NFH4, Q6ZS81, P53621, Q09028, Q13409, P62879, Q12788, Q96J01, Q9HAV0, Q6UXN9, Q969X6, Q8IWB7, O43684, Q9GZS3, Q9Y3F4, O15143, Q86W42, Q15291, P55884, O43815, Q13347, Q6P2E9, Q96DI7, Q15061, P57737, P63244, Q13112, P61964	1520	269	20063	1.71739	0.999853	0.174558	4.092
PFAM	PF00400:WD domain, G-beta repeat	32	2.08198	0.00332315	Q9C0J8, Q9ULV4, Q2TAY7, P35606, P43034, Q9HC35, Q8NFH4, Q6ZS81, P53621, Q09028, Q13409, P62879, Q12788, Q96J01, Q9HAV0, Q6UXN9, Q969X6, Q8IWB7, O43684, Q9GZS3, Q9Y3F4, O15143, Q86W42, Q15291, O43815, Q13347, Q96DI7, Q15061, P57737, P63244, Q13112, P61964	1444	225	17475	1.72114	0.984509	0.188098	5.26605
UP_SEQ_FEATURE	repeat:WD 2	35	2.27716	0.00382744	Q9C0J8, Q9ULV4, Q8WZ42, Q2TAY7, P35606, P43034, Q9HC35, Q8NFH4, Q6ZS81, P53621, Q09028, Q13409, P62879, Q12788, Q96J01, Q9HAV0, Q6UXN9, Q969X6, Q8IWB7, O43684, Q9GZS3, Q9Y3F4, O15143, Q86W42, Q15291, P55884, O43815, Q13347, Q6P2E9, Q96DI7, Q15061, P57737, P63244, Q13112, P61964	1520	278	20063	1.66179	1	0.259434	6.86316
UP_SEQ_FEATURE	repeat:WD 1	35	2.27716	0.00382744	Q9C0J8, Q9ULV4, Q8WZ42, Q2TAY7, P35606, P43034, Q9HC35, Q8NFH4, Q6ZS81, P53621, Q09028, Q13409, P62879, Q12788, Q96J01, Q9HAV0, Q6UXN9, Q969X6, Q8IWB7, O43684, Q9GZS3, Q9Y3F4, O15143, Q86W42, Q15291, P55884, O43815, Q13347, Q6P2E9, Q96DI7, Q15061, P57737, P63244, Q13112, P61964	1520	278	20063	1.66179	1	0.259434	6.86316
UP_KEYWORDS	WD repeat	34	2.2121	0.00621237	Q9C0J8, Q9ULV4, Q2TAY7, P35606, P43034, Q9HC35, Q8NFH4, Q6ZS81, P53621, Q09028, Q13409, P62879, Q12788, Q96J01, Q9HAV0, Q6UXN9, Q969X6, Q8IWB7, O43684, Q9GZS3, Q9Y3F4, O15143, Q86W42, Q15291, P55884, O43815, Q13347, Q6P2E9, Q96DI7, Q15061, P57737, P63244, Q13112, P61964	1532	281	20581	1.62548	0.948507	0.0304266	8.52632
INTERPRO	IPR001680:WD40 repeat	34	2.2121	0.0103815	Q9C0J8, Q9ULV4, Q2TAY7, P35606, P43034, Q9HC35, Q8NFH4, Q6ZS81, P53621, Q09028, Q13409, P62879, Q12788, Q96J01, Q9HAV0, Q6UXN9, Q969X6, Q8IWB7, O43684, Q9GZS3, Q9Y3F4, O15143, Q86W42, Q15291, O43815, Q13347, Q6P2E9, Q96DI7, Q15061, P57737, P63244, Q13112, P61964, P35658	1504	268	18559	1.56549	1	0.335741	16.7082
INTERPRO	IPR019775:WD40 repeat, conserved site	23	1.49642	0.0149801	Q6UXN9, Q8IWB7, Q9GZS3, Q9Y3F4, Q9ULV4, Q2TAY7, Q86W42, P43034, Q8NFH4, Q9HC35, Q6ZS81, O43815, P53621, Q13347, Q09028, Q96DI7, P62879, Q12788, P57737, P63244, Q13112, P61964, Q9HAV0	1504	166	18559	1.70973	1	0.420825	23.2346
INTERPRO	IPR017986:WD40-repeat-containing domain	36	2.34223	0.0240798	Q16531, Q9ULV4, Q9C0J8, Q2TAY7, P35606, P43034, Q9HC35, Q8NFH4, Q6ZS81, P53621, Q09028, Q13409, P62879, Q12788, Q96J01, Q9HAV0, Q6UXN9, Q969X6, Q8IWB7, O43684, Q9GZS3, Q9Y3F4, O15143, Q86W42, Q15291, P55884, O43815, Q13347, Q6P2E9, Q96DI7, Q15061, P57737, P63244, Q15393, Q13112, P61964	1504	306	18559	1.45174	1	0.529672	34.754
UP_SEQ_FEATURE	repeat:WD 7	19	1.23617	0.0368212	Q969X6, Q8IWB7, Q9GZS3, Q9Y3F4, Q8WZ42, Q9C0J8, P35606, Q86W42, P43034, Q9HC35, Q13409, Q96DI7, P62879, Q12788, P57737, P63244, Q13112, P61964, Q9HAV0	1520	151	20063	1.66084	1	0.804535	50.1218
INTERPRO	IPR015943:WD40/YVTN repeat-like-containing domain	37	2.40729	0.0423843	Q16531, Q9ULV4, Q9C0J8, Q2TAY7, P35606, P43034, Q9HC35, Q8NFH4, Q6ZS81, P53621, Q09028, Q13409, P62879, Q12788, Q96J01, Q9HAV0, Q6UXN9, Q969X6, Q8IWB7, O43684, Q8WUM0, Q9GZS3, Q9Y3F4, O15143, Q86W42, Q15291, P55884, O43815, Q13347, Q6P2E9, Q96DI7, Q15061, P57737, P63244, Q13112, P61964, P35658	1504	331	18559	1.37937	1	0.698317	53.1729
Annotation Cluster 42	Mitochondrion
Category	Term	Count	%	PValue	Genes	List Total	Pop Hits	Pop Total	Fold Enrichment	Bonferroni	Benjamini	FDR
GOTERM_BP_DIRECT	GO:0042776~mitochondrial ATP synthesis coupled proton transport	11	0.71568	3.76654e-06	P24539, P10606, Q99766, P08574, O75964, P48047, P56134, P00846, P30049, Q9UJZ1, P36542	1475	21	16792	5.96326	0.0149792	0.000209597	0.00700062
GOTERM_CC_DIRECT	GO:0005753~mitochondrial proton-transporting ATP synthase complex	10	0.650618	2.10842e-05	P24539, O75964, P48047, P56134, P00846, P30049, Q9UII2, P30405, Q96IX5, P36542	1511	21	18224	5.74328	0.017182	0.000309441	0.0324747
UP_KEYWORDS	ATP synthesis	7	0.455433	0.000700568	Q99766, O75964, P48047, P56134, P00846, P30049, P36542	1532	16	20581	5.87741	0.283651	0.00405987	0.997214
GOTERM_BP_DIRECT	GO:0006754~ATP biosynthetic process	9	0.585556	0.0027772	P24539, Q99766, O75964, P48047, P56134, P00846, P30049, O75323, P36542	1475	29	16792	3.53309	0.999986	0.0827595	5.03783
UP_KEYWORDS	Hydrogen ion transport	11	0.71568	0.00284626	P24539, Q99766, O75348, P61421, O75964, P48047, P56134, P00846, P30049, P36542, P21281	1532	49	20581	3.01581	0.742504	0.0144828	3.99423
UP_KEYWORDS	CF(0)	5	0.325309	0.016688	P24539, Q99766, O75964, P56134, P00846	1532	14	20581	4.79788	0.999668	0.0696242	21.3895
GOTERM_BP_DIRECT	GO:0015986~ATP synthesis coupled proton transport	6	0.390371	0.0386201	P24539, O75964, P48047, P00846, P30049, P36542	1475	22	16792	3.10484	1	0.516775	51.9083
Annotation Cluster 43	Aminoacyl
Category	Term	Count	%	PValue	Genes	List Total	Pop Hits	Pop Total	Fold Enrichment	Bonferroni	Benjamini	FDR
INTERPRO	IPR006195:Aminoacyl-tRNA synthetase, class II	9	0.585556	2.27082e-05	Q9Y285, O43776, Q15046, P07814, P14868, P26639, P12081, P41250, P49591	1504	17	18559	6.53281	0.052009	0.0024248	0.0397741
INTERPRO	IPR009068:S15/NS1, RNA-binding	5	0.325309	0.00122828	P56192, P07814, P12081, P62277, P41250	1504	7	18559	8.81411	0.944463	0.0732496	2.13009
INTERPRO	IPR000738:WHEP-TRS	4	0.260247	0.00467963	P56192, P07814, P12081, P41250	1504	5	18559	9.87181	0.999984	0.198	7.88873
PFAM	PF00458:WHEP-TRS domain	4	0.260247	0.00494791	P56192, P07814, P12081, P41250	1444	5	17475	9.68144	0.997991	0.256006	7.74494
INTERPRO	IPR002314:Aminoacyl-tRNA synthetase, class II (G/ H/ P/ S), conserved domain	4	0.260247	0.0217773	P07814, P26639, P41250, P49591	1504	8	18559	6.16988	1	0.508061	32.0041
INTERPRO	IPR004154:Anticodon-binding	5	0.325309	0.0221959	P07814, P26639, Q9HCD5, P12081, P41250	1504	14	18559	4.40706	1	0.510033	32.5121
PFAM	PF00587:tRNA synthetase class II core domain (G, H, P, S and T)	4	0.260247	0.0229411	P07814, P26639, P41250, P49591	1444	8	17475	6.0509	1	0.574553	31.4209
UP_SEQ_FEATURE	domain:WHEP-TRS	3	0.195185	0.0310051	P56192, P12081, P41250	1520	4	20063	9.89951	1	0.777787	44.2316
PFAM	PF03129:Anticodon binding domain	4	0.260247	0.0323322	P07814, P26639, P12081, P41250	1444	9	17475	5.37858	1	0.661375	41.383
Annotation Cluster 44	Chromosome condensation
Category	Term	Count	%	PValue	Genes	List Total	Pop Hits	Pop Total	Fold Enrichment	Bonferroni	Benjamini	FDR
GOTERM_CC_DIRECT	GO:0000796~condensin complex	5	0.325309	0.000219284	Q9BPX3, Q15021, O95347, Q15003, Q9NTJ3	1511	5	18224	12.0609	0.164957	0.00236918	0.337269
GOTERM_BP_DIRECT	GO:0007076~mitotic chromosome condensation	6	0.390371	0.00735391	Q9BPX3, Q15021, O95347, Q8WZ42, Q15003, Q9NTJ3	1475	15	16792	4.55376	1	0.176819	12.8197
UP_KEYWORDS	DNA condensation	5	0.325309	0.016688	Q9BPX3, Q15021, O95347, Q15003, Q9NTJ3	1532	14	20581	4.79788	0.999668	0.0696242	21.3895
Annotation Cluster 45	CS domain
Category	Term	Count	%	PValue	Genes	List Total	Pop Hits	Pop Total	Fold Enrichment	Bonferroni	Benjamini	FDR
PFAM	PF04969:CS domain	6	0.390371	0.0018433	Q15185, Q9UHD1, Q8WVJ2, Q9Y2Z0, Q96RS6, Q9Y266	1444	12	17475	6.0509	0.900733	0.134434	2.95399
UP_SEQ_FEATURE	domain:CS	6	0.390371	0.00532377	Q15185, Q9UHD1, Q8WVJ2, Q9Y2Z0, Q96RS6, Q9Y266	1520	16	20063	4.94975	1	0.320979	9.42313
INTERPRO	IPR007052:CS-like domain	6	0.390371	0.00938204	Q15185, Q9UHD1, Q8WVJ2, Q9Y2Z0, Q96RS6, Q9Y266	1504	17	18559	4.35521	1	0.313243	15.2222
INTERPRO	IPR008978:HSP20-like chaperone	7	0.455433	0.0223886	Q15185, Q9UHD1, Q8WVJ2, Q9Y2Z0, Q96RS6, Q9Y266, P04792	1504	28	18559	3.08494	1	0.508397	32.7446
Annotation Cluster 46	PWI domain
Category	Term	Count	%	PValue	Genes	List Total	Pop Hits	Pop Total	Fold Enrichment	Bonferroni	Benjamini	FDR
INTERPRO	IPR002483:PWI domain	4	0.260247	0.00467963	Q5T8P6, O43395, P49756, Q8IYB3	1504	5	18559	9.87181	0.999984	0.198	7.88873
PFAM	PF01480:PWI domain	4	0.260247	0.00494791	Q5T8P6, O43395, P49756, Q8IYB3	1444	5	17475	9.68144	0.997991	0.256006	7.74494
UP_SEQ_FEATURE	domain:PWI	3	0.195185	0.0163198	O43395, P49756, Q8IYB3	1520	3	20063	13.1993	1	0.606962	26.2936
Annotation Cluster 47	DNA repair
Category	Term	Count	%	PValue	Genes	List Total	Pop Hits	Pop Total	Fold Enrichment	Bonferroni	Benjamini	FDR
UP_KEYWORDS	DNA repair	37	2.40729	0.00207881	Q16531, P52701, P35244, Q14669, P41208, Q9Y5K5, P78527, O00487, Q99459, P46736, Q9BUH6, P49459, Q9BQP7, P62877, P18858, Q96MF7, P23396, P27694, P27695, Q92878, P61088, P13010, Q8NFC6, Q96FW1, O96019, Q9Y5B9, P15927, Q93009, P54727, Q13620, O60216, Q96FI4, P18887, Q7LG56, P09429, P43246, Q13112	1532	293	20581	1.69645	0.628626	0.0108261	2.93212
UP_KEYWORDS	DNA damage	41	2.66753	0.00496604	Q16531, P52701, P35244, Q8N163, Q14669, P41208, Q9Y5K5, P78527, O00487, Q13315, Q99459, Q9ULC4, P46736, Q9BUH6, P49459, Q9BQP7, P62877, P18858, Q96MF7, P23396, P27694, P27695, Q92878, P13010, P61088, Q8NFC6, Q96FW1, O96019, O60885, Q9Y5B9, P15927, Q93009, P54727, Q13620, O60216, Q96FI4, P18887, Q7LG56, P09429, P43246, Q13112	1532	352	20581	1.56476	0.906493	0.0248947	6.87199
GOTERM_BP_DIRECT	GO:0006281~DNA repair	30	1.95185	0.0386117	Q16531, Q71UM5, P52701, P35244, P06493, Q14669, Q9Y5K5, Q13315, Q99459, P46736, P49459, P28340, P18858, Q92900, P23396, P27694, P27695, Q92878, Q12824, Q29RF7, Q8NFC6, Q96FW1, P46063, O96019, Q9Y5B9, P63165, P40937, Q7LG56, P43246, Q13112	1475	235	16792	1.45333	1	0.518321	51.9004
Annotation Cluster 48	Rhythmic process
Category	Term	Count	%	PValue	Genes	List Total	Pop Hits	Pop Total	Fold Enrichment	Bonferroni	Benjamini	FDR
UP_KEYWORDS	Biological rhythms	21	1.3663	0.00090531	P62140, P36873, O15294, P11388, P11387, Q13185, Q13330, Q8N163, P68400, Q8WXF1, P78527, Q9Y2W1, Q13547, P43490, Q08211, Q00653, Q15910, Q9BQG0, P63244, P29590, P45983	1532	125	20581	2.25692	0.350221	0.00518078	1.2869
GOTERM_BP_DIRECT	GO:0048511~rhythmic process	11	0.71568	0.0177958	Q08211, Q00653, Q15910, P11388, Q13185, P63244, Q8N163, P68400, Q8WXF1, P78527, P45983	1475	54	16792	2.31905	1	0.335557	28.3766
GOTERM_BP_DIRECT	GO:0042752~regulation of circadian rhythm	10	0.650618	0.0251255	Q15910, P36873, P62140, P11388, Q8N163, Q8WXF1, P78527, P29590, P45983, P62136	1475	49	16792	2.32335	1	0.408793	37.6854
Annotation Cluster 49	Ubiquitin
Category	Term	Count	%	PValue	Genes	List Total	Pop Hits	Pop Total	Fold Enrichment	Bonferroni	Benjamini	FDR
INTERPRO	IPR023313:Ubiquitin-conjugating enzyme, active site	11	0.71568	1.87042e-05	P60604, P62837, P68036, P49459, P61081, O00762, O14933, P62253, P61088, P63279, P61086	1504	26	18559	5.22067	0.043039	0.00219721	0.032762
INTERPRO	IPR000608:Ubiquitin-conjugating enzyme, E2	13	0.845804	8.50327e-05	Q9C0C9, P60604, P62837, P68036, P49459, P61081, O00762, O14933, P62253, P61088, P63279, P61086, Q15819	1504	42	18559	3.81945	0.181274	0.00738024	0.148861
PFAM	PF00179:Ubiquitin-conjugating enzyme	13	0.845804	0.000102401	Q9C0C9, P60604, P62837, P68036, P49459, P61081, O00762, O14933, P62253, P61088, P63279, P61086, Q15819	1444	42	17475	3.7458	0.120334	0.0127395	0.166293
UP_SEQ_FEATURE	active site:Glycyl thioester intermediate	15	0.975927	0.000768824	Q9C0C9, P62837, P60604, P68036, A0AVT1, O14933, P61088, Q14669, P61086, P49459, P61081, O00762, P62253, P63279, Q9UBT2	1520	71	20063	2.78859	0.950801	0.0898274	1.4159
INTERPRO	IPR016135:Ubiquitin-conjugating enzyme/RWD-like	13	0.845804	0.00149074	Q9C0C9, P60604, P62837, P68036, P49459, P61081, O00762, O14933, P62253, P61088, P63279, P61086, Q15819	1504	56	18559	2.86459	0.970068	0.0820216	2.57966
GOTERM_MF_DIRECT	GO:0061631~ubiquitin conjugating enzyme activity	9	0.585556	0.00286307	Q9C0C9, P60604, P62837, P68036, P49459, O00762, P62253, P61088, Q15819	1490	29	16881	3.51606	0.979512	0.0637722	4.59675
KEGG_PATHWAY	hsa04120:Ubiquitin mediated proteolysis	26	1.69161	0.0277882	Q16531, Q15369, Q9C0C9, P60604, P62837, Q14669, P49459, P61081, Q15370, P63208, Q14139, P62877, Q13617, Q13618, P63279, Q9UBT2, P68036, A0AVT1, O14933, P61088, Q9UBE0, P61086, Q13620, O00762, P62253, P29590	854	137	6910	1.53558	0.999531	0.121836	30.9928
Annotation Cluster 50	Iron-sulfur
Category	Term	Count	%	PValue	Genes	List Total	Pop Hits	Pop Total	Fold Enrichment	Bonferroni	Benjamini	FDR
UP_KEYWORDS	Iron-sulfur	15	0.975927	0.000100551	P19404, Q8N5K1, P49821, P21912, P49643, Q9Y5Y2, Q6FI81, P28340, P53384, P28331, Q9NZ45, O76003, Q86U28, O75251, O75306	1532	60	20581	3.35852	0.0467373	0.000771714	0.1437
UP_KEYWORDS	2Fe-2S	6	0.390371	0.00854926	P19404, Q8N5K1, P21912, P28331, Q9NZ45, Q6FI81	1532	18	20581	4.47802	0.98321	0.0385354	11.5548
GOTERM_MF_DIRECT	GO:0051537~2 iron, 2 sulfur cluster binding	7	0.455433	0.0191361	P19404, Q8N5K1, P21912, P28331, Q9NZ45, Q86U28, Q6FI81	1490	25	16881	3.17227	1	0.270695	27.1753
Annotation Cluster 51	Catabolic process
Category	Term	Count	%	PValue	Genes	List Total	Pop Hits	Pop Total	Fold Enrichment	Bonferroni	Benjamini	FDR
GOTERM_BP_DIRECT	GO:0043928~exonucleolytic nuclear-transcribed mRNA catabolic process involved in deadenylation-dependent decay	15	0.975927	3.32851e-08	P26196, Q9NQT5, Q13868, Q9Y2L1, Q9Y333, Q9NPD3, P62312, Q6P2E9, Q96C86, Q9UK45, O15116, Q96B26, Q9Y3B2, Q9Y4Z0, P62310	1475	29	16792	5.88849	0.000133365	2.66747e-06	6.18669e-05
UP_KEYWORDS	Exosome	6	0.390371	0.00175533	Q9NQT5, Q13868, Q9Y2L1, Q96B26, Q9Y3B2, Q9NPD3	1532	13	20581	6.20034	0.566677	0.00924887	2.48117
GOTERM_CC_DIRECT	GO:0000177~cytoplasmic exosome (RNase complex)	6	0.390371	0.00283608	Q9NQT5, Q13868, Q9Y2L1, Q9Y2V2, Q96B26, Q9NPD3	1511	13	18224	5.56656	0.903147	0.022628	4.28078
GOTERM_MF_DIRECT	GO:0004532~exoribonuclease activity	6	0.390371	0.00539085	Q9NQT5, Q13868, Q96C86, Q96B26, Q9Y3B2, Q9NPD3	1490	14	16881	4.85551	0.999344	0.108213	8.48951
GOTERM_CC_DIRECT	GO:0000176~nuclear exosome (RNase complex)	6	0.390371	0.00575356	Q9NQT5, Q13868, Q9Y2L1, Q96B26, Q9Y3B2, Q9NPD3	1511	15	18224	4.82435	0.991288	0.0422026	8.50521
GOTERM_CC_DIRECT	GO:0000178~exosome (RNase complex)	6	0.390371	0.00780546	Q9NQT5, Q13868, Q9Y2L1, Q96B26, Q9Y3B2, Q9NPD3	1511	16	18224	4.52283	0.998406	0.0554081	11.3711
GOTERM_MF_DIRECT	GO:0000175~3'-5'-exoribonuclease activity	6	0.390371	0.0267935	Q9NQT5, Q13868, Q9H0D6, Q9Y2L1, Q96AZ6, Q9NPD3	1490	20	16881	3.39886	1	0.335815	35.9653
GOTERM_BP_DIRECT	GO:0034475~U4 snRNA 3'-end processing	4	0.260247	0.0270027	Q9NQT5, Q13868, Q96B26, Q9NPD3	1475	8	16792	5.6922	1	0.423739	39.8783
GOTERM_BP_DIRECT	GO:0034427~nuclear-transcribed mRNA catabolic process, exonucleolytic, 3'-5'	4	0.260247	0.0379062	Q9NQT5, Q13868, Q96B26, Q9NPD3	1475	9	16792	5.05974	1	0.514982	51.2401
GOTERM_BP_DIRECT	GO:0071034~CUT catabolic process	3	0.195185	0.0409798	Q9NQT5, Q13868, Q9Y2L1	1475	4	16792	8.53831	1	0.533322	54.0555
Annotation Cluster 52	Isomerase
Category	Term	Count	%	PValue	Genes	List Total	Pop Hits	Pop Total	Fold Enrichment	Bonferroni	Benjamini	FDR
GOTERM_BP_DIRECT	GO:0061077~chaperone-mediated protein folding	12	0.780742	0.000229883	P27824, Q9UHD1, P23284, Q8N5M4, Q02790, P62942, Q13451, P26885, P68400, Q9H3U1, Q12931, Q00688	1475	37	16792	3.69224	0.601978	0.00965049	0.426421
INTERPRO	IPR023566:Peptidyl-prolyl cis-trans isomerase, FKBP-type	7	0.455433	0.00401543	Q8N5M4, Q02790, P62942, Q13451, Q5T1M5, P26885, Q00688	1504	20	18559	4.31892	0.999922	0.175624	6.80594
INTERPRO	IPR001179:Peptidyl-prolyl cis-trans isomerase, FKBP-type, domain	6	0.390371	0.0121394	Q02790, P62942, Q13451, Q5T1M5, P26885, Q00688	1504	18	18559	4.11325	1	0.375578	19.2625
PFAM	PF00254:FKBP-type peptidyl-prolyl cis-trans isomerase	6	0.390371	0.0131397	Q02790, P62942, Q13451, Q5T1M5, P26885, Q00688	1444	18	17475	4.03393	1	0.458456	19.3428
GOTERM_MF_DIRECT	GO:0005528~FK506 binding	6	0.390371	0.0267935	Q8N5M4, Q02790, P62942, Q13451, P26885, Q00688	1490	20	16881	3.39886	1	0.335815	35.9653
Annotation Cluster 53	Antigen processing/MHC II
Category	Term	Count	%	PValue	Genes	List Total	Pop Hits	Pop Total	Fold Enrichment	Bonferroni	Benjamini	FDR
GOTERM_MF_DIRECT	GO:0042605~peptide antigen binding	12	0.780742	1.26671e-05	P79483, P01892, P13760, P20036, P04229, Q30154, P30443, P18462, P01909, Q30134, P01889, O15533, P01911, P01903, P01912, P04440, Q9TQE0, P01920, P13761, P30460	1490	28	16881	4.85551	0.01703	0.000686831	0.0207878
UP_SEQ_FEATURE	region of interest:Connecting peptide	12	0.780742	2.53154e-05	P06340, P01892, P13760, P20036, P04229, P30443, P18462, P01909, Q30134, P01889, P01911, P01903, P01912, P04440, P01906, P01920, P13761, P13765, P30460	1520	34	20063	4.65859	0.0943808	0.00494455	0.0469266
INTERPRO	IPR000353:MHC class II, beta chain, N-terminal	8	0.520494	8.10343e-05	P79483, P01892, P13760, P04229, Q30154, P30443, P18462, Q30134, P01911, P01912, P04440, Q9TQE0, P01920, P13761, P13765	1504	15	18559	6.58121	0.173537	0.00759503	0.141866
PFAM	PF00969:Class II histocompatibility antigen, beta domain	8	0.520494	9.17209e-05	P79483, P01892, P13760, P04229, Q30154, P30443, P18462, Q30134, P01911, P01912, P04440, Q9TQE0, P01920, P13761, P13765	1444	15	17475	6.45429	0.108491	0.0126789	0.148961
GOTERM_BP_DIRECT	GO:0002474~antigen processing and presentation of peptide antigen via MHC class I	10	0.650618	0.000788969	P27824, P01892, Q9NZ08, P30443, P18462, Q03519, P01889, O15533, P61769, P01920, P51572, P53992, P30460	1475	30	16792	3.7948	0.957686	0.0285982	1.45632
GOTERM_BP_DIRECT	GO:0016045~detection of bacterium	5	0.325309	0.0221914	P01892, P13760, P04229, P30443, Q30154, P18462, Q30134, P01889, P01911, P01912, Q9TQE0, P13761, P30460	1475	13	16792	4.37862	1	0.38335	34.1055
UP_KEYWORDS	MHC I	4	0.260247	0.0331786	P61769, P01892, P01920, P30443, P18462, P01889, P30460	1532	10	20581	5.37363	1	0.122411	38.278
GOTERM_BP_DIRECT	GO:0002480~antigen processing and presentation of exogenous peptide antigen via MHC class I, TAP-independent	4	0.260247	0.0379062	P61769, P01892, P30443, P18462, P01889, P30460, Q9UIQ6	1475	9	16792	5.05974	1	0.514982	51.2401
Annotation Cluster 54	Actin binding
Category	Term	Count	%	PValue	Genes	List Total	Pop Hits	Pop Total	Fold Enrichment	Bonferroni	Benjamini	FDR
INTERPRO	IPR002108:Actin-binding, cofilin/tropomyosin type	5	0.325309	0.00604568	Q9Y281, Q6IBS0, O60234, P60983, P60981	1504	10	18559	6.16988	0.999999	0.235938	10.0785
PFAM	PF00241:Cofilin/tropomyosin-type actin-binding protein	5	0.325309	0.0064818	Q9Y281, Q6IBS0, O60234, P60983, P60981	1444	10	17475	6.0509	0.999709	0.298114	10.0292
UP_SEQ_FEATURE	domain:ADF-H	4	0.260247	0.0181645	Q9Y281, O60234, P60983, P60981	1520	8	20063	6.59967	1	0.636172	28.8147
Annotation Cluster 55	Ribosomal protein
Category	Term	Count	%	PValue	Genes	List Total	Pop Hits	Pop Total	Fold Enrichment	Bonferroni	Benjamini	FDR
GOTERM_BP_DIRECT	GO:0000470~maturation of LSU-rRNA	7	0.455433	0.00113065	Q9BXY0, P46087, Q9BYD6, Q9NX24, P62906, O76021, P56537	1475	15	16792	5.31272	0.989253	0.0389838	2.08078
INTERPRO	IPR016095:Ribosomal protein L1, 3-layer alpha/beta-sandwich	3	0.195185	0.0186033	Q9BYD6, P62906, O76021	1504	3	18559	12.3398	1	0.472762	28.0338
INTERPRO	IPR016094:Ribosomal protein L1, 2-layer alpha/beta-sandwich	3	0.195185	0.0186033	Q9BYD6, P62906, O76021	1504	3	18559	12.3398	1	0.472762	28.0338
INTERPRO	IPR023674:Ribosomal protein L1, superfamily	3	0.195185	0.0186033	Q9BYD6, P62906, O76021	1504	3	18559	12.3398	1	0.472762	28.0338
PFAM	PF00687:Ribosomal protein L1p/L10e family	3	0.195185	0.019319	Q9BYD6, P62906, O76021	1444	3	17475	12.1018	1	0.545189	27.1702
Annotation Cluster 56	Importin
Category	Term	Count	%	PValue	Genes	List Total	Pop Hits	Pop Total	Fold Enrichment	Bonferroni	Benjamini	FDR
GOTERM_CC_DIRECT	GO:0034399~nuclear periphery	9	0.585556	0.000166228	Q14974, Q92621, Q92973, Q8N1F7, P57740, O75475, P23497, P52948, O00410	1511	21	18224	5.16895	0.127725	0.00195025	0.255764
GOTERM_MF_DIRECT	GO:0008536~Ran GTPase binding	10	0.650618	0.000817217	O15392, Q14974, P61970, Q92973, P49792, Q9UIA9, O14980, Q9H6Z4, P43487, O00410	1490	30	16881	3.77651	0.669979	0.0238119	1.33284
UP_SEQ_FEATURE	repeat:HEAT 6	9	0.585556	0.00137281	Q9BPX3, Q14974, Q9UBF2, Q92973, O14980, Q92616, O75533, Q86VP6, O00410	1520	30	20063	3.9598	0.99539	0.125839	2.5149
GOTERM_BP_DIRECT	GO:0000059~protein import into nucleus, docking	5	0.325309	0.0031011	Q14974, Q92621, Q92973, P52948, O00410	1475	8	16792	7.11525	0.999996	0.0899752	5.60948
GOTERM_BP_DIRECT	GO:0006607~NLS-bearing protein import into nucleus	7	0.455433	0.0124055	Q14974, Q92973, P49792, Q7Z3B4, Q8NFH5, O00505, O00410	1475	23	16792	3.46482	1	0.261512	20.7073
UP_SEQ_FEATURE	domain:Importin N-terminal	5	0.325309	0.0177118	Q14974, Q92973, Q9UIA9, O14980, O00410	1520	14	20063	4.71405	1	0.632021	28.2036
GOTERM_BP_DIRECT	GO:0000060~protein import into nucleus, translocation	7	0.455433	0.0318169	Q14974, P61970, Q92973, P60468, Q9NW64, Q99623, O00410	1475	28	16792	2.8461	1	0.465223	45.1732
COG_ONTOLOGY	Intracellular trafficking and secretion	9	0.585556	0.0355187	Q14974, Q9UBF2, Q92973, Q9Y678, Q8WVM8, P53992, Q709C8, O00505, O00410	189	42	2026	2.29705	0.746974	0.290763	27.8796
PFAM	PF03810:Importin-beta N-terminal domain	5	0.325309	0.0377328	Q14974, Q92973, Q9UIA9, O14980, O00410	1444	16	17475	3.78181	1	0.691036	46.4793
INTERPRO	IPR001494:Importin-beta, N-terminal	5	0.325309	0.0434896	Q14974, Q92973, Q9UIA9, O14980, O00410	1504	17	18559	3.62934	1	0.703595	54.1108
Annotation Cluster 57	DNA recombination
Category	Term	Count	%	PValue	Genes	List Total	Pop Hits	Pop Total	Fold Enrichment	Bonferroni	Benjamini	FDR
GOTERM_MF_DIRECT	GO:0003684~damaged DNA binding	16	1.04099	0.000298314	Q16531, P27694, P27695, P52701, P35244, P13010, P15927, P54727, Q13620, P28340, P26583, Q96FI4, P18887, P43246, P09429, P23396	1490	63	16881	2.87734	0.332739	0.0108749	0.488484
GOTERM_BP_DIRECT	GO:0006284~base-excision repair	9	0.585556	0.0095089	P27694, P27695, P18858, Q96FI4, P35244, P17096, P18887, P09429, P15927	1475	35	16792	2.92742	1	0.215185	16.2712
UP_KEYWORDS	DNA recombination	12	0.780742	0.0370759	P27694, P27695, P26583, P18858, P13010, P35244, P09429, O96019, Q96MF7, Q9Y5K5, P15927, P78527	1532	81	20581	1.99023	1	0.135003	41.7423
Annotation Cluster 58	Nucleic acid binding
Category	Term	Count	%	PValue	Genes	List Total	Pop Hits	Pop Total	Fold Enrichment	Bonferroni	Benjamini	FDR
INTERPRO	IPR006195:Aminoacyl-tRNA synthetase, class II	9	0.585556	2.27082e-05	Q9Y285, O43776, Q15046, P07814, P14868, P26639, P12081, P41250, P49591	1504	17	18559	6.53281	0.052009	0.0024248	0.0397741
INTERPRO	IPR004365:Nucleic acid binding, OB-fold, tRNA/helicase-type	4	0.260247	0.0217773	P27694, O43776, Q15046, P14868	1504	8	18559	6.16988	1	0.508061	32.0041
PFAM	PF01336:OB-fold nucleic acid binding domain	4	0.260247	0.0229411	P27694, O43776, Q15046, P14868	1444	8	17475	6.0509	1	0.574553	31.4209
Annotation Cluster 59	Spectrin
Category	Term	Count	%	PValue	Genes	List Total	Pop Hits	Pop Total	Fold Enrichment	Bonferroni	Benjamini	FDR
UP_KEYWORDS	Actin capping	8	0.520494	0.00028205	P52907, Q01082, P47755, P06396, P47756, P11277, P02549, Q13813	1532	19	20581	5.65645	0.12565	0.00191637	0.402599
UP_SEQ_FEATURE	repeat:Spectrin 4	8	0.520494	0.000634345	P12814, Q15149, Q01082, Q8NF91, O43707, P11277, P02549, Q13813	1520	21	20063	5.02832	0.916665	0.0794919	1.16961
UP_SEQ_FEATURE	repeat:Spectrin 3	8	0.520494	0.000870006	P12814, Q15149, Q01082, Q8NF91, O43707, P11277, P02549, Q13813	1520	22	20063	4.79976	0.966907	0.0953869	1.60082
UP_KEYWORDS	Elliptocytosis	5	0.325309	0.00167366	P16157, P11171, P11277, P02549, P02730	1532	8	20581	8.3963	0.549469	0.00901962	2.367
GOTERM_CC_DIRECT	GO:0014731~spectrin-associated cytoskeleton	5	0.325309	0.00250347	Q01082, P16157, P11171, P11277, P02549	1511	8	18224	7.53805	0.872602	0.0203935	3.78777
UP_SEQ_FEATURE	repeat:Spectrin 1	8	0.520494	0.00256826	P12814, Q15149, Q01082, Q8NF91, O43707, P11277, P02549, Q13813	1520	26	20063	4.06134	0.999958	0.189251	4.65604
UP_SEQ_FEATURE	repeat:Spectrin 2	8	0.520494	0.00256826	P12814, Q15149, Q01082, Q8NF91, O43707, P11277, P02549, Q13813	1520	26	20063	4.06134	0.999958	0.189251	4.65604
UP_SEQ_FEATURE	domain:Actin-binding	7	0.455433	0.00286413	P12814, Q15149, Q01082, Q8NF91, P21333, O43707, P11277	1520	20	20063	4.61977	0.999987	0.20485	5.17904
INTERPRO	IPR002017:Spectrin repeat	8	0.520494	0.00294713	P12814, Q01082, Q8NF91, O43707, P11277, Q86UP2, P02549, Q13813	1504	25	18559	3.94872	0.999034	0.134651	5.03918
PFAM	PF00435:Spectrin repeat	8	0.520494	0.00328851	P12814, Q01082, Q8NF91, O43707, P11277, Q86UP2, P02549, Q13813	1444	25	17475	3.87258	0.98382	0.195112	5.21253
GOTERM_CC_DIRECT	GO:0008091~spectrin	5	0.325309	0.00421182	Q01082, P11171, P11277, P02549, Q13813	1511	9	18224	6.70049	0.968865	0.0322006	6.29503
INTERPRO	IPR018159:Spectrin/alpha-actinin	8	0.520494	0.00719675	P12814, Q15149, Q01082, Q8NF91, O43707, P11277, P02549, Q13813	1504	29	18559	3.40407	1	0.265725	11.8855
INTERPRO	IPR001589:Actinin-type, actin-binding, conserved site	7	0.455433	0.0084815	P12814, Q15149, Q01082, Q8NF91, P21333, O43707, P11277	1504	23	18559	3.75558	1	0.300747	13.8618
INTERPRO	IPR014837:EF-hand, Ca insensitive	4	0.260247	0.0087967	P12814, O43707, P02549, Q13813	1504	6	18559	8.22651	1	0.301136	14.3403
PFAM	PF08726:Ca2+ insensitive EF hand	4	0.260247	0.00928948	P12814, O43707, P02549, Q13813	1444	6	17475	8.06787	0.999992	0.373365	14.0735
UP_SEQ_FEATURE	repeat:Spectrin 15	5	0.325309	0.00989122	Q01082, Q8NF91, P11277, P02549, Q13813	1520	12	20063	5.49973	1	0.471728	16.8318
UP_SEQ_FEATURE	repeat:Spectrin 16	5	0.325309	0.00989122	Q01082, Q8NF91, P11277, P02549, Q13813	1520	12	20063	5.49973	1	0.471728	16.8318
UP_SEQ_FEATURE	repeat:Spectrin 13	5	0.325309	0.00989122	Q01082, Q8NF91, P11277, P02549, Q13813	1520	12	20063	5.49973	1	0.471728	16.8318
UP_SEQ_FEATURE	repeat:Spectrin 14	5	0.325309	0.00989122	Q01082, Q8NF91, P11277, P02549, Q13813	1520	12	20063	5.49973	1	0.471728	16.8318
UP_SEQ_FEATURE	repeat:Spectrin 11	5	0.325309	0.00989122	Q01082, Q8NF91, P11277, P02549, Q13813	1520	12	20063	5.49973	1	0.471728	16.8318
UP_SEQ_FEATURE	repeat:Spectrin 12	5	0.325309	0.00989122	Q01082, Q8NF91, P11277, P02549, Q13813	1520	12	20063	5.49973	1	0.471728	16.8318
UP_SEQ_FEATURE	repeat:Spectrin 10	5	0.325309	0.00989122	Q01082, Q8NF91, P11277, P02549, Q13813	1520	12	20063	5.49973	1	0.471728	16.8318
UP_SEQ_FEATURE	repeat:Spectrin 17	5	0.325309	0.00989122	Q01082, Q8NF91, P11277, P02549, Q13813	1520	12	20063	5.49973	1	0.471728	16.8318
UP_SEQ_FEATURE	repeat:Spectrin 9	5	0.325309	0.0134432	Q01082, Q8NF91, P11277, P02549, Q13813	1520	13	20063	5.07667	1	0.552034	22.193
UP_SEQ_FEATURE	repeat:Spectrin 8	5	0.325309	0.0134432	Q01082, Q8NF91, P11277, P02549, Q13813	1520	13	20063	5.07667	1	0.552034	22.193
UP_SEQ_FEATURE	repeat:Spectrin 7	5	0.325309	0.0134432	Q01082, Q8NF91, P11277, P02549, Q13813	1520	13	20063	5.07667	1	0.552034	22.193
UP_SEQ_FEATURE	repeat:Spectrin 6	5	0.325309	0.0134432	Q01082, Q8NF91, P11277, P02549, Q13813	1520	13	20063	5.07667	1	0.552034	22.193
UP_SEQ_FEATURE	domain:CH 2	7	0.455433	0.0138759	P12814, Q15149, Q01082, Q8NF91, P21333, O43707, P11277	1520	27	20063	3.42205	1	0.558111	22.8234
UP_SEQ_FEATURE	domain:CH 1	7	0.455433	0.0138759	P12814, Q15149, Q01082, Q8NF91, P21333, O43707, P11277	1520	27	20063	3.42205	1	0.558111	22.8234
UP_SEQ_FEATURE	repeat:Spectrin 5	5	0.325309	0.0177118	Q01082, Q8NF91, P11277, P02549, Q13813	1520	14	20063	4.71405	1	0.632021	28.2036
PFAM	PF00307:Calponin homology (CH) domain	12	0.780742	0.0205975	P46940, Q99439, P12814, Q15149, Q01082, Q8NF91, Q15691, P21333, Q15555, O43707, P11277, Q14155	1444	67	17475	2.16749	1	0.557047	28.698
GOTERM_BP_DIRECT	GO:0051693~actin filament capping	5	0.325309	0.0221914	Q01082, P06396, P11277, P02549, Q13813	1475	13	16792	4.37862	1	0.38335	34.1055
INTERPRO	IPR001715:Calponin homology domain	12	0.780742	0.0417612	P46940, Q99439, P12814, Q15149, Q01082, Q8NF91, Q15691, P21333, Q15555, O43707, P11277, Q14155	1504	76	18559	1.94838	1	0.697124	52.6362
Annotation Cluster 60	GST
Category	Term	Count	%	PValue	Genes	List Total	Pop Hits	Pop Total	Fold Enrichment	Bonferroni	Benjamini	FDR
INTERPRO	IPR010987:Glutathione S-transferase, C-terminal-like	10	0.650618	0.00477531	P26640, P56192, O75431, P07814, Q9Y696, Q13155, P78417, O43324, Q9H7Z7, O43708	1504	41	18559	3.0097	0.999987	0.198086	8.04374
INTERPRO	IPR004046:Glutathione S-transferase, C-terminal	7	0.455433	0.0084815	P26640, P56192, P07814, Q13155, P78417, O43324, O43708	1504	23	18559	3.75558	1	0.300747	13.8618
UP_SEQ_FEATURE	domain:GST C-terminal	8	0.520494	0.0194232	P26640, P56192, Q9Y696, Q13155, P78417, O43324, Q9H7Z7, O43708	1520	37	20063	2.85391	1	0.650826	30.4877
PFAM	PF00043:Glutathione S-transferase, C-terminal domain	5	0.325309	0.0377328	P26640, P56192, P07814, Q13155, O43324	1444	16	17475	3.78181	1	0.691036	46.4793
Annotation Cluster 61	Nucleotide excision repair
Category	Term	Count	%	PValue	Genes	List Total	Pop Hits	Pop Total	Fold Enrichment	Bonferroni	Benjamini	FDR
GOTERM_BP_DIRECT	GO:0000715~nucleotide-excision repair, DNA damage recognition	12	0.780742	1.1505e-06	P54727, Q16531, P62979, Q7L5N1, Q99627, Q13620, Q9UNS2, Q13098, P62877, P41208, Q9BT78, Q9H9Q2	1475	23	16792	5.93969	0.00459946	6.88046e-05	0.00213841
GOTERM_BP_DIRECT	GO:0070911~global genome nucleotide-excision repair	11	0.71568	0.000280723	P54727, Q16531, P62979, Q13620, P62877, P61956, P61088, P41208, P63279, P63165, Q15819	1475	32	16792	3.91339	0.675352	0.0112994	0.520492
GOTERM_BP_DIRECT	GO:0006294~nucleotide-excision repair, preincision complex assembly	9	0.585556	0.0027772	P54727, P27694, Q16531, P62979, Q13620, P62877, P35244, P41208, P15927	1475	29	16792	3.53309	0.999986	0.0827595	5.03783
GOTERM_CC_DIRECT	GO:0005662~DNA replication factor A complex	6	0.390371	0.00575356	P27694, Q99459, Q00577, P35244, O75934, P15927	1511	15	18224	4.82435	0.991288	0.0422026	8.50521
GOTERM_BP_DIRECT	GO:0006293~nucleotide-excision repair, preincision complex stabilization	6	0.390371	0.0320903	P27694, Q16531, Q13620, P62877, P35244, P15927	1475	21	16792	3.25269	1	0.466522	45.4603
GOTERM_BP_DIRECT	GO:0000717~nucleotide-excision repair, DNA duplex unwinding	6	0.390371	0.0386201	P54727, Q16531, P62979, Q13620, P62877, P41208	1475	22	16792	3.10484	1	0.516775	51.9083
GOTERM_BP_DIRECT	GO:0006295~nucleotide-excision repair, DNA incision, 3'-to lesion	6	0.390371	0.045902	P27694, Q16531, Q13620, P62877, P35244, P15927	1475	23	16792	2.96985	1	0.565308	58.2462
Annotation Cluster 62	Mre11 complex
Category	Term	Count	%	PValue	Genes	List Total	Pop Hits	Pop Total	Fold Enrichment	Bonferroni	Benjamini	FDR
GOTERM_BP_DIRECT	GO:0007004~telomere maintenance via telomerase	8	0.520494	0.00052895	Q13315, O60832, Q15554, P35251, Q9NY12, Q92878, Q9NX24, Q9NYB0	1475	18	16792	5.05974	0.879976	0.0198019	0.978597
GOTERM_CC_DIRECT	GO:0030870~Mre11 complex	4	0.260247	0.00937956	Q15554, Q92878, Q9NYB0, P23497	1511	6	18224	8.04059	0.999568	0.0651413	13.5126
Annotation Cluster 63	Dynamin
Category	Term	Count	%	PValue	Genes	List Total	Pop Hits	Pop Total	Fold Enrichment	Bonferroni	Benjamini	FDR
INTERPRO	IPR001401:Dynamin, GTPase domain	5	0.325309	0.00122828	Q05193, P20591, O00429, O60313, P20592	1504	7	18559	8.81411	0.944463	0.0732496	2.13009
PFAM	PF00350:Dynamin family	6	0.390371	0.005669	Q9H223, Q05193, P20591, O00429, O60313, P20592	1444	15	17475	4.84072	0.999189	0.276414	8.82549
INTERPRO	IPR000375:Dynamin central domain	4	0.260247	0.0087967	Q05193, P20591, O00429, P20592	1504	6	18559	8.22651	1	0.301136	14.3403
INTERPRO	IPR019762:Dynamin, GTPase region, conserved site	4	0.260247	0.0087967	Q05193, P20591, O00429, P20592	1504	6	18559	8.22651	1	0.301136	14.3403
PFAM	PF01031:Dynamin central region	4	0.260247	0.00928948	Q05193, P20591, O00429, P20592	1444	6	17475	8.06787	0.999992	0.373365	14.0735
INTERPRO	IPR022812:Dynamin	6	0.390371	0.00938204	Q9H223, Q05193, P20591, O00429, O60313, P20592	1504	17	18559	4.35521	1	0.313243	15.2222
UP_SEQ_FEATURE	domain:GED	4	0.260247	0.0120233	Q05193, P20591, O00429, P20592	1520	7	20063	7.54248	1	0.517486	20.0904
INTERPRO	IPR003130:Dynamin GTPase effector	4	0.260247	0.014473	Q05193, P20591, O00429, P20592	1504	7	18559	7.05129	1	0.414781	22.5393
PFAM	PF02212:Dynamin GTPase effector domain	4	0.260247	0.015265	Q05193, P20591, O00429, P20592	1444	7	17475	6.91531	1	0.485268	22.1199
INTERPRO	IPR020850:GTPase effector domain, GED	4	0.260247	0.0307289	Q05193, P20591, O00429, P20592	1504	9	18559	5.48434	1	0.609813	42.1185
Annotation Cluster 64	Purine biosynthesis
Category	Term	Count	%	PValue	Genes	List Total	Pop Hits	Pop Total	Fold Enrichment	Bonferroni	Benjamini	FDR
UP_KEYWORDS	Purine biosynthesis	6	0.390371	0.00175533	P22102, O15067, P30520, P49915, P11586, P30566	1532	13	20581	6.20034	0.566677	0.00924887	2.48117
GOTERM_BP_DIRECT	GO:0009168~purine ribonucleoside monophosphate biosynthetic process	5	0.325309	0.0221914	P22102, O15067, P30520, P49915, P30566	1475	13	16792	4.37862	1	0.38335	34.1055
Annotation Cluster 65	Prefoldin
Category	Term	Count	%	PValue	Genes	List Total	Pop Hits	Pop Total	Fold Enrichment	Bonferroni	Benjamini	FDR
GOTERM_CC_DIRECT	GO:0016272~prefoldin complex	5	0.325309	0.00133953	Q9UHV9, P61758, Q99471, O60925, Q9NQP4	1511	7	18224	8.61492	0.667738	0.011905	2.04372
INTERPRO	IPR009053:Prefoldin	7	0.455433	0.0157078	Q9UHV9, P13645, P02533, P61758, Q99471, O60925, Q9NQP4	1504	26	18559	3.32224	1	0.431193	24.2221
Annotation Cluster 66	Clathrin
Category	Term	Count	%	PValue	Genes	List Total	Pop Hits	Pop Total	Fold Enrichment	Bonferroni	Benjamini	FDR
INTERPRO	IPR013041:Coatomer/clathrin adaptor appendage, Ig-like subdomain	6	0.390371	0.00168928	Q9UBF2, Q9Y678, Q9UJY4, Q9UJY5, Q10567, O43747	1504	12	18559	6.16988	0.98125	0.0903359	2.91846
INTERPRO	IPR002553:Clathrin/coatomer adaptor, adaptin-like, N-terminal	5	0.325309	0.0221959	Q9UBF2, Q9Y678, Q10567, O43747, P53618	1504	14	18559	4.40706	1	0.510033	32.5121
PFAM	PF01602:Adaptin N terminal region	5	0.325309	0.0236751	Q9UBF2, Q9Y678, Q10567, O43747, P53618	1444	14	17475	4.32207	1	0.575599	32.2534
Annotation Cluster 67	Catabolic process
Category	Term	Count	%	PValue	Genes	List Total	Pop Hits	Pop Total	Fold Enrichment	Bonferroni	Benjamini	FDR
GOTERM_BP_DIRECT	GO:0009083~branched-chain amino acid catabolic process	7	0.455433	0.00451496	Q9HCC0, P31937, Q6NVY1, Q99714, P09622, P21953, Q9UKU7	1475	19	16792	4.19426	1	0.12148	8.06693
UP_KEYWORDS	Branched-chain amino acid catabolism	3	0.195185	0.0299866	P31937, Q6NVY1, Q9UKU7	1532	4	20581	10.0756	0.999999	0.112003	35.299
GOTERM_BP_DIRECT	GO:0006574~valine catabolic process	3	0.195185	0.0409798	P31937, Q6NVY1, Q9UKU7	1475	4	16792	8.53831	1	0.533322	54.0555
Annotation Cluster 68	Nop domain
Category	Term	Count	%	PValue	Genes	List Total	Pop Hits	Pop Total	Fold Enrichment	Bonferroni	Benjamini	FDR
UP_SEQ_FEATURE	domain:Nop	3	0.195185	0.0163198	Q8WWY3, Q9Y2X3, O00567	1520	3	20063	13.1993	1	0.606962	26.2936
INTERPRO	IPR012976:NOSIC	3	0.195185	0.0186033	Q8WWY3, Q9Y2X3, O00567	1504	3	18559	12.3398	1	0.472762	28.0338
INTERPRO	IPR002687:Nop domain	3	0.195185	0.0186033	Q8WWY3, Q9Y2X3, O00567	1504	3	18559	12.3398	1	0.472762	28.0338
PFAM	PF01798:Putative snoRNA binding domain	3	0.195185	0.019319	Q8WWY3, Q9Y2X3, O00567	1444	3	17475	12.1018	1	0.545189	27.1702
Annotation Cluster 69	LUC7
Category	Term	Count	%	PValue	Genes	List Total	Pop Hits	Pop Total	Fold Enrichment	Bonferroni	Benjamini	FDR
UP_SEQ_FEATURE	compositionally biased region:Arg/Ser-rich	5	0.325309	0.00474246	Q5T200, Q9NQ29, O15042, Q9Y383, O95232	1520	10	20063	6.59967	1	0.300922	8.43661
INTERPRO	IPR004882:LUC7-related	3	0.195185	0.0352145	Q9NQ29, Q9Y383, O95232	1504	4	18559	9.25482	1	0.65607	46.636
PFAM	PF03194:LUC7 N_terminus	3	0.195185	0.036529	Q9NQ29, Q9Y383, O95232	1444	4	17475	9.07635	1	0.688004	45.3808
Annotation Cluster 70	Dehydrogenase
Category	Term	Count	%	PValue	Genes	List Total	Pop Hits	Pop Total	Fold Enrichment	Bonferroni	Benjamini	FDR
INTERPRO	IPR020904:Short-chain dehydrogenase/reductase, conserved site	10	0.650618	0.00227245	P51659, Q92506, Q9Y394, P09417, Q8N4T8, Q99714, Q7Z4W1, Q9BTZ2, P16152, Q53GQ0	1504	37	18559	3.33507	0.995256	0.114507	3.90717
INTERPRO	IPR002347:Glucose/ribitol dehydrogenase	10	0.650618	0.0385639	P51659, Q92506, Q9Y394, P09417, Q8N4T8, Q99714, Q7Z4W1, Q9BTZ2, P16152, Q53GQ0	1504	57	18559	2.16487	1	0.685327	49.7901
Annotation Cluster 71	DNA polymerase activity
Category	Term	Count	%	PValue	Genes	List Total	Pop Hits	Pop Total	Fold Enrichment	Bonferroni	Benjamini	FDR
GOTERM_BP_DIRECT	GO:0006298~mismatch repair	11	0.71568	0.000626311	P27694, P52701, P28340, Q9HCU8, Q15054, P18858, P35244, P49005, P43246, O75792, P15927	1475	35	16792	3.57796	0.918766	0.0229765	1.15773
GOTERM_BP_DIRECT	GO:0006271~DNA strand elongation involved in DNA replication	7	0.455433	0.00113065	P28340, Q9HCU8, Q15054, P40938, P49005, P49643, P35249	1475	15	16792	5.31272	0.989253	0.0389838	2.08078
GOTERM_CC_DIRECT	GO:0043625~delta DNA polymerase complex	4	0.260247	0.00213038	P28340, Q9HCU8, Q15054, P49005	1511	4	18224	12.0609	0.826753	0.0179102	3.23191
GOTERM_BP_DIRECT	GO:0006261~DNA-dependent DNA replication	6	0.390371	0.0168217	P27694, P35251, Q9HCU8, Q00059, Q15054, P49005	1475	18	16792	3.7948	1	0.32189	27.0448
GOTERM_MF_DIRECT	GO:0003887~DNA-directed DNA polymerase activity	7	0.455433	0.0380064	Q9NRG0, P28340, Q9HCU8, Q15054, Q9BQG0, P49005, P49643	1490	29	16881	2.73471	1	0.408691	47.0564
KEGG_PATHWAY	hsa03410:Base excision repair	9	0.585556	0.0433667	P27695, P28340, Q9HCU8, Q15054, P18858, Q96FI4, P49005, P18887, P09429	854	33	6910	2.20673	0.999994	0.174211	44.211
Annotation Cluster 72	Ubiquitin protease
Category	Term	Count	%	PValue	Genes	List Total	Pop Hits	Pop Total	Fold Enrichment	Bonferroni	Benjamini	FDR
INTERPRO	IPR000555:JAB1/Mov34/MPN/PAD-1	5	0.325309	0.0125011	Q7L5N1, P46736, O15372, Q6P2Q9, O00487	1504	12	18559	5.14157	1	0.379498	19.7788
PFAM	PF01398:JAB1/Mov34/MPN/PAD-1 ubiquitin protease	5	0.325309	0.0133683	Q7L5N1, P46736, O15372, Q6P2Q9, O00487	1444	12	17475	5.04242	1	0.452167	19.6459
Annotation Cluster 73	Coatomer/clathrin
Category	Term	Count	%	PValue	Genes	List Total	Pop Hits	Pop Total	Fold Enrichment	Bonferroni	Benjamini	FDR
INTERPRO	IPR013041:Coatomer/clathrin adaptor appendage, Ig-like subdomain	6	0.390371	0.00168928	Q9UBF2, Q9Y678, Q9UJY4, Q9UJY5, Q10567, O43747	1504	12	18559	6.16988	0.98125	0.0903359	2.91846
INTERPRO	IPR008152:Clathrin adaptor, alpha/beta/gamma-adaptin, appendage, Ig-like subdomain	4	0.260247	0.0307289	Q9UJY4, Q9UJY5, Q10567, O43747	1504	9	18559	5.48434	1	0.609813	42.1185
PFAM	PF02883:Adaptin C-terminal domain	4	0.260247	0.0323322	Q9UJY4, Q9UJY5, Q10567, O43747	1444	9	17475	5.37858	1	0.661375	41.383
GOTERM_CC_DIRECT	GO:0030131~clathrin adaptor complex	5	0.325309	0.0381488	Q9UJY4, Q9UJY5, Q10567, Q9BXS5, O43747	1511	16	18224	3.76903	1	0.201608	45.0735
UP_SEQ_FEATURE	domain:GAE	3	0.195185	0.0491046	Q9UJY4, Q9UJY5, O43747	1520	5	20063	7.91961	1	0.871767	60.6847
Annotation Cluster 74	HMG box
Category	Term	Count	%	PValue	Genes	List Total	Pop Hits	Pop Total	Fold Enrichment	Bonferroni	Benjamini	FDR
PFAM	PF09011:HMG-box domain	6	0.390371	0.000674909	B2RPK0, Q00059, P26583, P17480, P09429, P23497	1444	10	17475	7.26108	0.570559	0.0547931	1.09124
UP_SEQ_FEATURE	DNA-binding region:HMG box 2	6	0.390371	0.00919893	B2RPK0, Q00059, P26583, P17480, P09429, P23497	1520	18	20063	4.39978	1	0.452921	15.747
UP_SEQ_FEATURE	DNA-binding region:HMG box 1	6	0.390371	0.00919893	B2RPK0, Q00059, P26583, P17480, P09429, P23497	1520	18	20063	4.39978	1	0.452921	15.747
Annotation Cluster 75	snoRNP complex
Category	Term	Count	%	PValue	Genes	List Total	Pop Hits	Pop Total	Fold Enrichment	Bonferroni	Benjamini	FDR
GOTERM_BP_DIRECT	GO:0007004~telomere maintenance via telomerase	8	0.520494	0.00052895	Q13315, O60832, Q15554, P35251, Q9NY12, Q92878, Q9NX24, Q9NYB0	1475	18	16792	5.05974	0.879976	0.0198019	0.978597
GOTERM_CC_DIRECT	GO:0005697~telomerase holoenzyme complex	6	0.390371	0.0257337	Q15185, O60832, Q9H0A0, Q9NY12, Q9NX24, P14678	1511	21	18224	3.44597	1	0.145786	33.0758
GOTERM_CC_DIRECT	GO:0031429~box H/ACA snoRNP complex	3	0.195185	0.0367658	O60832, Q9NY12, Q9NX24	1511	4	18224	9.04567	1	0.196177	43.8443
GOTERM_CC_DIRECT	GO:0090661~box H/ACA telomerase RNP complex	3	0.195185	0.0367658	O60832, Q9NY12, Q9NX24	1511	4	18224	9.04567	1	0.196177	43.8443
GOTERM_CC_DIRECT	GO:0072589~box H/ACA scaRNP complex	3	0.195185	0.0367658	O60832, Q9NY12, Q9NX24	1511	4	18224	9.04567	1	0.196177	43.8443
GOTERM_BP_DIRECT	GO:0031118~rRNA pseudouridine synthesis	3	0.195185	0.0409798	O60832, Q9NY12, Q9NX24	1475	4	16792	8.53831	1	0.533322	54.0555
GOTERM_MF_DIRECT	GO:0034513~box H/ACA snoRNA binding	3	0.195185	0.0413538	O60832, Q9NY12, Q9NX24	1490	4	16881	8.49715	1	0.42962	50.0002
Annotation Cluster 76	Cold-shock protein
Category	Term	Count	%	PValue	Genes	List Total	Pop Hits	Pop Total	Fold Enrichment	Bonferroni	Benjamini	FDR
INTERPRO	IPR019844:Cold-shock conserved site	4	0.260247	0.0087967	P67809, P16989, O75534, Q9Y2V2	1504	6	18559	8.22651	1	0.301136	14.3403
INTERPRO	IPR011129:Cold shock protein	4	0.260247	0.0217773	P67809, P16989, O75534, Q9Y2V2	1504	8	18559	6.16988	1	0.508061	32.0041
INTERPRO	IPR002059:Cold-shock protein, DNA-binding	4	0.260247	0.0217773	P67809, P16989, O75534, Q9Y2V2	1504	8	18559	6.16988	1	0.508061	32.0041
PFAM	PF00313:'Cold-shock' DNA-binding domain	4	0.260247	0.0229411	P67809, P16989, O75534, Q9Y2V2	1444	8	17475	6.0509	1	0.574553	31.4209
Annotation Cluster 77	RNA polymerase activity
Category	Term	Count	%	PValue	Genes	List Total	Pop Hits	Pop Total	Fold Enrichment	Bonferroni	Benjamini	FDR
GOTERM_BP_DIRECT	GO:0010467~gene expression	19	1.23617	4.89001e-08	Q09161, Q13151, P52434, P52435, P52298, Q9NZI8, P62487, P19388, P24928, P19387, P36954, P55795, P53803, O43390, Q15007, O00425, Q9H4A6, Q15366, P38159	1475	48	16792	4.50633	0.000195924	3.76812e-06	9.08904e-05
GOTERM_BP_DIRECT	GO:0050434~positive regulation of viral transcription	11	0.71568	0.000111245	P36954, P52434, O00267, P52435, P53803, Q8WX92, P63272, P62487, P19388, P24928, P19387	1475	29	16792	4.31822	0.359677	0.00499626	0.206568
GOTERM_BP_DIRECT	GO:0006370~7-methylguanosine mRNA capping	11	0.71568	0.00037137	Q09161, P36954, P52434, O00267, P52435, P53803, P52298, P62487, P19388, P24928, P19387	1475	33	16792	3.7948	0.774257	0.0143462	0.688015
GOTERM_CC_DIRECT	GO:0005665~DNA-directed RNA polymerase II, core complex	8	0.520494	0.000371431	P36954, P52434, P52435, P53803, P62487, P19388, P24928, P19387	1511	18	18224	5.36039	0.263151	0.00367243	0.570651
GOTERM_MF_DIRECT	GO:0001055~RNA polymerase II activity	6	0.390371	0.000915662	P52434, P52435, P53803, P19388, P24928, P19387	1490	10	16881	6.79772	0.711254	0.0260837	1.49227
GOTERM_BP_DIRECT	GO:0006368~transcription elongation from RNA polymerase II promoter	17	1.10605	0.00304702	Q15369, Q09161, P52434, P52435, P52298, Q8WX92, Q9Y5B9, P62487, P19388, Q8N7H5, P19387, P24928, P36954, O00267, P53803, Q15370, P63272	1475	86	16792	2.25041	0.999995	0.0891198	5.51426
UP_KEYWORDS	DNA-directed RNA polymerase	9	0.585556	0.0070913	P36954, P52434, P52435, P53803, P49643, P62487, P19388, P24928, P19387	1532	39	20581	3.10017	0.966206	0.0326652	9.67649
GOTERM_BP_DIRECT	GO:0008543~fibroblast growth factor receptor signaling pathway	15	0.975927	0.0115498	P46940, Q09161, P52434, P52435, P52298, P27361, P62487, P19388, P19387, P24928, P36954, P62979, P31483, P53803, P28482	1475	82	16792	2.08251	1	0.24842	19.4204
GOTERM_BP_DIRECT	GO:0042795~snRNA transcription from RNA polymerase II promoter	13	0.845804	0.0179954	Q09161, P52434, P52435, P52298, P14859, P62487, P19388, Q96P16, P19387, P24928, Q9NQG5, P36954, P53803	1475	70	16792	2.11425	1	0.337078	28.6466
GOTERM_MF_DIRECT	GO:0003899~DNA-directed RNA polymerase activity	8	0.520494	0.0459323	P36954, P52434, P52435, P53803, P62487, P19388, P24928, P19387	1490	38	16881	2.38516	1	0.455146	53.7785
KEGG_PATHWAY	hsa00240:Pyrimidine metabolism	20	1.30124	0.049972	P52434, P52435, Q9HCU8, P49643, P49005, P62487, P19388, P15531, P24928, P19387, P36954, P23921, P00491, P53803, P23919, P28340, P27707, P27708, Q15054, Q7LG56	854	104	6910	1.55603	0.999999	0.185398	49.074
Annotation Cluster 78	Translation/elongation factor
Category	Term	Count	%	PValue	Genes	List Total	Pop Hits	Pop Total	Fold Enrichment	Bonferroni	Benjamini	FDR
INTERPRO	IPR009000:Translation elongation/initiation factor/Ribosomal, beta-barrel	8	0.520494	0.00874423	Q9NY12, P49588, Q96RP9, O60841, Q2VIR3, Q15029, P39023, P41091	1504	30	18559	3.2906	1	0.303997	14.2608
INTERPRO	IPR004161:Translation elongation factor EFTu/EF1A, domain 2	5	0.325309	0.0283702	Q96RP9, O60841, Q2VIR3, Q15029, P41091	1504	15	18559	4.11325	1	0.584849	39.6007
PFAM	PF03144:Elongation factor Tu domain 2	5	0.325309	0.0302227	Q96RP9, O60841, Q2VIR3, Q15029, P41091	1444	15	17475	4.03393	1	0.645995	39.2714
Annotation Cluster 79	Zinc finger
Category	Term	Count	%	PValue	Genes	List Total	Pop Hits	Pop Total	Fold Enrichment	Bonferroni	Benjamini	FDR
PFAM	PF00641:Zn-finger in Ran binding protein and others	6	0.390371	0.0101686	P52756, P49792, P35637, Q01844, Q92804, P98175	1444	17	17475	4.27122	0.999997	0.388698	15.3044
UP_SEQ_FEATURE	zinc finger region:RanBP2-type	5	0.325309	0.0425523	P52756, P35637, Q01844, Q92804, P98175	1520	18	20063	3.66648	1	0.839748	55.3464
INTERPRO	IPR001876:Zinc finger, RanBP2-type	6	0.390371	0.0470771	P52756, P49792, P35637, Q01844, Q92804, P98175	1504	25	18559	2.96154	1	0.724405	57.0343
Annotation Cluster 80	Aminopeptidase
Category	Term	Count	%	PValue	Genes	List Total	Pop Hits	Pop Total	Fold Enrichment	Bonferroni	Benjamini	FDR
UP_KEYWORDS	Aminopeptidase	10	0.650618	0.00012842	P53582, Q9H4A4, Q9ULA0, P55786, Q9NY33, P50579, P29144, Q9NZ08, Q9UIQ6, A6NEC2	1532	28	20581	4.79788	0.0593008	0.000954729	0.183494
GOTERM_MF_DIRECT	GO:0004177~aminopeptidase activity	9	0.585556	0.00173555	P53582, Q9H4A4, Q9ULA0, Q13867, P55786, P50579, P29144, Q9NZ08, Q9UIQ6	1490	27	16881	3.77651	0.905149	0.0442864	2.81068
GOTERM_MF_DIRECT	GO:0070006~metalloaminopeptidase activity	8	0.520494	0.00283528	P53582, Q9H4A4, Q9ULA0, P55786, P50579, Q9NZ08, Q9UIQ6, A6NEC2	1490	23	16881	3.94071	0.978722	0.0642258	4.5531
GOTERM_BP_DIRECT	GO:0043171~peptide catabolic process	7	0.455433	0.00988877	Q9H4A4, O14773, Q96KP4, P55786, Q9NZ08, Q9UIQ6, A6NEC2	1475	22	16792	3.62231	1	0.221549	16.866
GOTERM_MF_DIRECT	GO:0008235~metalloexopeptidase activity	5	0.325309	0.0167628	P53582, Q9H4A4, P50579, Q9NZ08, O75844	1490	12	16881	4.72064	1	0.254638	24.2288
INTERPRO	IPR001930:Peptidase M1, alanine aminopeptidase/leukotriene A4 hydrolase	5	0.325309	0.016918	Q9H4A4, P55786, Q9NZ08, Q9UIQ6, A6NEC2	1504	13	18559	4.74606	1	0.450628	25.8378
INTERPRO	IPR014782:Peptidase M1, membrane alanine aminopeptidase, N-terminal	5	0.325309	0.0221959	Q9H4A4, P55786, Q9NZ08, Q9UIQ6, A6NEC2	1504	14	18559	4.40706	1	0.510033	32.5121
PFAM	PF01433:Peptidase family M1	5	0.325309	0.0236751	Q9H4A4, P55786, Q9NZ08, Q9UIQ6, A6NEC2	1444	14	17475	4.32207	1	0.575599	32.2534
Annotation Cluster 81	SAP domain
Category	Term	Count	%	PValue	Genes	List Total	Pop Hits	Pop Total	Fold Enrichment	Bonferroni	Benjamini	FDR
PFAM	PF02037:SAP domain	6	0.390371	0.016645	P35659, Q9NWH9, Q15424, Q9UKV3, Q9BUJ2, Q8IX12	1444	19	17475	3.82162	1	0.503662	23.8749
UP_SEQ_FEATURE	domain:SAP	6	0.390371	0.0313051	P35659, Q9NWH9, Q15424, Q9UKV3, Q9BUJ2, Q8IX12	1520	24	20063	3.29984	1	0.772987	44.5509
INTERPRO	IPR003034:SAP domain	6	0.390371	0.0402515	P35659, Q9NWH9, Q15424, Q9UKV3, Q9BUJ2, Q8IX12	1504	24	18559	3.08494	1	0.696678	51.3119
Annotation Cluster 82	Retromer complex
Category	Term	Count	%	PValue	Genes	List Total	Pop Hits	Pop Total	Fold Enrichment	Bonferroni	Benjamini	FDR
GOTERM_CC_DIRECT	GO:0030904~retromer complex	10	0.650618	3.30605e-05	P20645, Q96QK1, O60493, Q13596, Q9UNH7, Q14203, Q9UBQ0, Q9Y5X3, P51149, O60749	1511	22	18224	5.48222	0.0268103	0.000468446	0.0509168
GOTERM_CC_DIRECT	GO:0030905~retromer, tubulation complex	4	0.260247	0.00213038	Q13596, Q9UNH7, Q9Y5X3, O60749	1511	4	18224	12.0609	0.826753	0.0179102	3.23191
INTERPRO	IPR015404:Vps5 C-terminal	4	0.260247	0.00467963	Q13596, Q9UNH7, Q9Y5X3, O60749	1504	5	18559	9.87181	0.999984	0.198	7.88873
PFAM	PF09325:Vps5 C terminal like	4	0.260247	0.00494791	Q13596, Q9UNH7, Q9Y5X3, O60749	1444	5	17475	9.68144	0.997991	0.256006	7.74494
GOTERM_BP_DIRECT	GO:0016050~vesicle organization	7	0.455433	0.0318169	Q13596, Q9UNH7, Q9UMY4, Q9Y5X3, Q9Y5K6, O60749, P42566	1475	28	16792	2.8461	1	0.465223	45.1732
Annotation Cluster 83	Fatty acid metabolism
Category	Term	Count	%	PValue	Genes	List Total	Pop Hits	Pop Total	Fold Enrichment	Bonferroni	Benjamini	FDR
UP_KEYWORDS	Fatty acid metabolism	18	1.17111	0.0104031	P49748, Q15185, P51659, Q9NZ01, Q9BW60, P42126, Q4G176, Q8N4T8, Q9H7Z7, P49327, P09110, Q92506, P23786, O75608, P30084, P40939, P55084, Q16836	1532	124	20581	1.95011	0.993111	0.045045	13.8907
GOTERM_BP_DIRECT	GO:0006635~fatty acid beta-oxidation	10	0.650618	0.0128398	P51659, P49748, Q6NVY1, P23786, P30084, P42126, P40939, P55084, P09110, Q16836	1475	44	16792	2.58737	1	0.267975	21.3527
KEGG_PATHWAY	hsa00071:Fatty acid degradation	11	0.71568	0.0385018	P49748, P49189, P23786, P30084, P42126, P40939, P55084, P09110, P11766, Q16836, P05091	854	44	6910	2.02283	0.999977	0.15823	40.3587
Annotation Cluster 84	Proteasomel protein catabolic process
Category	Term	Count	%	PValue	Genes	List Total	Pop Hits	Pop Total	Fold Enrichment	Bonferroni	Benjamini	FDR
GOTERM_BP_DIRECT	GO:0061136~regulation of proteasomal protein catabolic process	7	0.455433	0.00167556	Q9UL46, P61289, P17612, P54578, P07203, Q9Y5K5, O00487	1475	16	16792	4.98068	0.998793	0.0535895	3.0689
Annotation Cluster 85	Ribosome
Category	Term	Count	%	PValue	Genes	List Total	Pop Hits	Pop Total	Fold Enrichment	Bonferroni	Benjamini	FDR
INTERPRO	IPR020568:Ribosomal protein S5 domain 2-type fold	12	0.780742	0.000596041	P15880, Q02880, Q58FF8, P11388, Q96RP9, P36776, Q15029, Q96B26, Q14568, Q58FG0, Q12931, Q9NPD3	1504	44	18559	3.36539	0.753971	0.0392739	1.03906
GOTERM_BP_DIRECT	GO:0006950~response to stress	12	0.780742	0.0160979	Q58FF8, Q14289, Q92918, P28482, P31948, P15121, O95433, Q14568, Q58FG0, Q12931, P41567, P45983	1475	61	16792	2.23956	1	0.316335	26.04
INTERPRO	IPR003594:Histidine kinase-like ATPase, ATP-binding domain	7	0.455433	0.0467277	A6NHR9, Q02880, Q58FF8, P11388, Q14568, Q58FG0, Q12931	1504	33	18559	2.61752	1	0.725753	56.7575
Annotation Cluster 86	Chromosome maintenance
Category	Term	Count	%	PValue	Genes	List Total	Pop Hits	Pop Total	Fold Enrichment	Bonferroni	Benjamini	FDR
INTERPRO	IPR018525:Mini-chromosome maintenance, conserved site	4	0.260247	0.0087967	P33993, P33992, P49736, P25205	1504	6	18559	8.22651	1	0.301136	14.3403
PFAM	PF14551:MCM N-terminal domain	4	0.260247	0.00928948	P33993, P33992, P49736, P25205	1444	6	17475	8.06787	0.999992	0.373365	14.0735
UP_SEQ_FEATURE	domain:MCM	4	0.260247	0.0181645	P33993, P33992, P49736, P25205	1520	8	20063	6.59967	1	0.636172	28.8147
INTERPRO	IPR001208:Mini-chromosome maintenance, DNA-dependent ATPase	4	0.260247	0.0307289	P33993, P33992, P49736, P25205	1504	9	18559	5.48434	1	0.609813	42.1185
PFAM	PF00493:MCM2/3/5 family	4	0.260247	0.0323322	P33993, P33992, P49736, P25205	1444	9	17475	5.37858	1	0.661375	41.383
GOTERM_CC_DIRECT	GO:0042555~MCM complex	4	0.260247	0.032624	P33993, P33992, P49736, P25205	1511	9	18224	5.36039	1	0.179274	40.0071
Annotation Cluster 87	Enzyme activity
Category	Term	Count	%	PValue	Genes	List Total	Pop Hits	Pop Total	Fold Enrichment	Bonferroni	Benjamini	FDR
GOTERM_MF_DIRECT	GO:0008641~small protein activating enzyme activity	4	0.260247	0.0182791	A0AVT1, Q13564, Q9UBE0, Q9UBT2	1490	7	16881	6.47402	1	0.262928	26.1239
INTERPRO	IPR000594:UBA/THIF-type NAD/FAD binding fold	4	0.260247	0.0413074	A0AVT1, Q13564, Q9UBE0, Q9UBT2	1504	10	18559	4.9359	1	0.697419	52.2418
PFAM	PF00899:ThiF family	4	0.260247	0.0434109	A0AVT1, Q13564, Q9UBE0, Q9UBT2	1444	10	17475	4.84072	1	0.733661	51.3873
Annotation Cluster 88	Protein export
Category	Term	Count	%	PValue	Genes	List Total	Pop Hits	Pop Total	Fold Enrichment	Bonferroni	Benjamini	FDR
KEGG_PATHWAY	hsa03060:Protein export	8	0.520494	0.017559	O76094, Q9Y5M8, P61011, P60468, Q15005, Q9UHB9, P61009, P67812	854	23	6910	2.81438	0.991921	0.0884992	20.7993
GOTERM_MF_DIRECT	GO:0008312~7S RNA binding	4	0.260247	0.0182791	O76094, Q13868, P61011, Q9UHB9	1490	7	16881	6.47402	1	0.262928	26.1239
Annotation Cluster 89	Ribosome
Category	Term	Count	%	PValue	Genes	List Total	Pop Hits	Pop Total	Fold Enrichment	Bonferroni	Benjamini	FDR
GOTERM_MF_DIRECT	GO:0070180~large ribosomal subunit rRNA binding	4	0.260247	0.0182791	Q8NHW5, P05388, P84098, Q9UKD2	1490	7	16881	6.47402	1	0.262928	26.1239
INTERPRO	IPR001790:Ribosomal protein L10/acidic P0	3	0.195185	0.0352145	Q8NHW5, P05388, Q9UKD2	1504	4	18559	9.25482	1	0.65607	46.636
PFAM	PF00466:Ribosomal protein L10	3	0.195185	0.036529	Q8NHW5, P05388, Q9UKD2	1444	4	17475	9.07635	1	0.688004	45.3808
Annotation Cluster 90	CID domain
Category	Term	Count	%	PValue	Genes	List Total	Pop Hits	Pop Total	Fold Enrichment	Bonferroni	Benjamini	FDR
UP_SEQ_FEATURE	domain:CID	4	0.260247	0.0181645	Q9NQG5, Q9UPN6, O15042, Q96P16	1520	8	20063	6.59967	1	0.636172	28.8147
INTERPRO	IPR008942:ENTH/VHS	7	0.455433	0.0188471	Q9NQG5, Q9UPN6, O15042, Q9UJY4, Q9UJY5, Q14677, Q96P16	1504	27	18559	3.1992	1	0.472341	28.3463
INTERPRO	IPR006569:CID domain	4	0.260247	0.0217773	Q9NQG5, Q9UPN6, O15042, Q96P16	1504	8	18559	6.16988	1	0.508061	32.0041
Annotation Cluster 91	Metabolism
Category	Term	Count	%	PValue	Genes	List Total	Pop Hits	Pop Total	Fold Enrichment	Bonferroni	Benjamini	FDR
INTERPRO	IPR000836:Phosphoribosyltransferase domain	5	0.325309	0.0125011	P11908, P00492, P60891, P07741, O60256	1504	12	18559	5.14157	1	0.379498	19.7788
UP_KEYWORDS	Nucleotide biosynthesis	4	0.260247	0.0173184	P11908, P23919, P60891, O60256	1532	8	20581	6.71704	0.999755	0.0703484	22.1072
GOTERM_CC_DIRECT	GO:0002189~ribose phosphate diphosphokinase complex	3	0.195185	0.0194481	P11908, P60891, O60256	1511	3	18224	12.0609	1	0.117632	26.1064
GOTERM_BP_DIRECT	GO:0009116~nucleoside metabolic process	6	0.390371	0.021217	P11908, P00491, P60891, P07741, O60256, Q13126	1475	19	16792	3.59508	1	0.374729	32.8743
Annotation Cluster 92	COMM domain
Category	Term	Count	%	PValue	Genes	List Total	Pop Hits	Pop Total	Fold Enrichment	Bonferroni	Benjamini	FDR
UP_SEQ_FEATURE	domain:COMM	4	0.260247	0.0347302	Q9Y6G5, Q8N668, Q9UBI1, Q7Z4G1	1520	10	20063	5.27974	1	0.800023	48.0754
INTERPRO	IPR017920:COMM domain	4	0.260247	0.0413074	Q9Y6G5, Q8N668, Q9UBI1, Q7Z4G1	1504	10	18559	4.9359	1	0.697419	52.2418
PFAM	PF07258:HCaRG protein	4	0.260247	0.0434109	Q9Y6G5, Q8N668, Q9UBI1, Q7Z4G1	1444	10	17475	4.84072	1	0.733661	51.3873
Annotation Cluster 93	Ubiquitin
Category	Term	Count	%	PValue	Genes	List Total	Pop Hits	Pop Total	Fold Enrichment	Bonferroni	Benjamini	FDR
UP_SEQ_FEATURE	domain:Ubiquitin-like	9	0.585556	0.0184514	P54727, P46379, Q15370, Q9BZL1, P61956, P11441, P54578, Q15459, P63165	1520	45	20063	2.63987	1	0.636844	29.1993
INTERPRO	IPR000626:Ubiquitin	11	0.71568	0.0191901	P54727, P62979, P46379, Q15370, Q9BZL1, P61956, Q99426, P11441, P54578, Q15459, P63165	1504	59	18559	2.30063	1	0.473701	28.7839
Annotation Cluster 94	HAT
Category	Term	Count	%	PValue	Genes	List Total	Pop Hits	Pop Total	Fold Enrichment	Bonferroni	Benjamini	FDR
UP_SEQ_FEATURE	repeat:HAT 8	4	0.260247	0.00727799	Q15020, Q8NF91, O94906, Q12996	1520	6	20063	8.79956	1	0.389323	12.6663
UP_SEQ_FEATURE	repeat:HAT 7	4	0.260247	0.0120233	Q15020, Q8NF91, O94906, Q12996	1520	7	20063	7.54248	1	0.517486	20.0904
UP_SEQ_FEATURE	repeat:HAT 6	4	0.260247	0.0257339	Q15020, Q8NF91, O94906, Q12996	1520	9	20063	5.86637	1	0.725367	38.3302
UP_SEQ_FEATURE	repeat:HAT 5	4	0.260247	0.0451255	Q15020, Q8NF91, O94906, Q12996	1520	11	20063	4.79976	1	0.853926	57.5198
UP_SEQ_FEATURE	repeat:HAT 9	3	0.195185	0.0491046	Q8NF91, O94906, Q12996	1520	5	20063	7.91961	1	0.871767	60.6847
Annotation Cluster 95	Ligase complex
Category	Term	Count	%	PValue	Genes	List Total	Pop Hits	Pop Total	Fold Enrichment	Bonferroni	Benjamini	FDR
GOTERM_CC_DIRECT	GO:0009328~phenylalanine-tRNA ligase complex	3	0.195185	0.0194481	Q9Y285, Q8N1G4, Q9NSD9	1511	3	18224	12.0609	1	0.117632	26.1064
Annotation Cluster 96	VCB complex
Category	Term	Count	%	PValue	Genes	List Total	Pop Hits	Pop Total	Fold Enrichment	Bonferroni	Benjamini	FDR
GOTERM_CC_DIRECT	GO:0030891~VCB complex	4	0.260247	0.0154096	Q15369, Q15370, P62877, Q13617	1511	7	18224	6.89194	0.999997	0.0963488	21.2765
Annotation Cluster 97	Catalytic activity
Category	Term	Count	%	PValue	Genes	List Total	Pop Hits	Pop Total	Fold Enrichment	Bonferroni	Benjamini	FDR
UP_SEQ_FEATURE	site:Important for catalytic activity	5	0.325309	0.0134432	Q96KP4, P30084, P42126, P40939, Q16836	1520	13	20063	5.07667	1	0.552034	22.193
INTERPRO	IPR018376:Enoyl-CoA hydratase/isomerase, conserved site	4	0.260247	0.0217773	Q9NTX5, P30084, P42126, P40939	1504	8	18559	6.16988	1	0.508061	32.0041
KEGG_PATHWAY	hsa00640:Propanoate metabolism	8	0.520494	0.0492289	Q6NVY1, Q9NTX5, P30084, P53597, P40939, P00338, Q96I99, Q9P2R7	854	28	6910	2.31181	0.999999	0.187831	48.5472
Annotation Cluster 98	GTPase superfamily
Category	Term	Count	%	PValue	Genes	List Total	Pop Hits	Pop Total	Fold Enrichment	Bonferroni	Benjamini	FDR
INTERPRO	IPR024156:Small GTPase superfamily, ARF type	7	0.455433	0.0409304	Q9Y5M8, P18085, P36404, P36405, P62330, P84085, P84077	1504	32	18559	2.69932	1	0.698416	51.9117
Annotation Cluster 99	NADP
Category	Term	Count	%	PValue	Genes	List Total	Pop Hits	Pop Total	Fold Enrichment	Bonferroni	Benjamini	FDR
UP_SEQ_FEATURE	nucleotide phosphate-binding region:NADP	15	0.975927	0.00117723	P48735, Q13630, Q9BTZ2, P16152, P11586, O43488, P09417, P11413, Q13303, P14550, Q9UBQ7, P15121, Q7Z4W1, Q53GQ0, C9JRZ8	1520	74	20063	2.67554	0.990076	0.111549	2.16031
GOTERM_MF_DIRECT	GO:0004033~aldo-keto reductase (NADP) activity	5	0.325309	0.0373864	O43488, Q13303, P15121, P14550, P00167	1490	15	16881	3.77651	1	0.406607	46.4936
INTERPRO	IPR001395:Aldo/keto reductase	5	0.325309	0.0434896	O43488, Q13303, P15121, P14550, C9JRZ8	1504	17	18559	3.62934	1	0.703595	54.1108
Annotation Cluster 100	Magnesium
Category	Term	Count	%	PValue	Genes	List Total	Pop Hits	Pop Total	Fold Enrichment	Bonferroni	Benjamini	FDR
UP_SEQ_FEATURE	metal ion-binding site:Magnesium or manganese	5	0.325309	0.0425523	P27695, Q9NZJ9, P48735, P50213, P51553	1520	18	20063	3.66648	1	0.839748	55.3464
UP_SEQ_FEATURE	site:Critical for catalysis	3	0.195185	0.0491046	P48735, P50213, P51553	1520	5	20063	7.91961	1	0.871767	60.6847
KEGG_PATHWAY	hsa01210:2-Oxocarboxylic acid metabolism	6	0.390371	0.0492989	P17174, P00505, P48735, P50213, O75390, P51553	854	17	6910	2.85577	0.999999	0.185549	48.597
Annotation Cluster 101	Protein transport
Category	Term	Count	%	PValue	Genes	List Total	Pop Hits	Pop Total	Fold Enrichment	Bonferroni	Benjamini	FDR
GOTERM_BP_DIRECT	GO:0006626~protein targeting to mitochondrion	8	0.520494	0.0259445	O75431, O94826, Q9NS69, Q9Y5J9, Q96DA6, P55957, O96008, Q9Y3D6	1475	34	16792	2.67868	1	0.414143	38.6513
GOTERM_MF_DIRECT	GO:0008320~protein transmembrane transporter activity	4	0.260247	0.0273522	O94826, P61970, Q9NS69, O96008	1490	8	16881	5.66477	1	0.338507	36.5661
Annotation Cluster 102	Arp2/3 complex
Category	Term	Count	%	PValue	Genes	List Total	Pop Hits	Pop Total	Fold Enrichment	Bonferroni	Benjamini	FDR
GOTERM_CC_DIRECT	GO:0005885~Arp2/3 protein complex	5	0.325309	0.0135282	Q9P1U1, Q9BPX5, O15145, O15143, O15511	1511	12	18224	5.02537	0.999986	0.0876863	18.9271
Annotation Cluster 103	Phosphorylation
Category	Term	Count	%	PValue	Genes	List Total	Pop Hits	Pop Total	Fold Enrichment	Bonferroni	Benjamini	FDR
GOTERM_CC_DIRECT	GO:0072357~PTW/PP1 phosphatase complex	5	0.325309	0.00133953	Q6UXN9, P36873, P62140, O14974, P62136	1511	7	18224	8.61492	0.667738	0.011905	2.04372
GOTERM_CC_DIRECT	GO:0070688~MLL5-L complex	5	0.325309	0.00250347	O15294, P36873, P62140, P51610, P62136	1511	8	18224	7.53805	0.872602	0.0203935	3.78777
INTERPRO	IPR006186:Serine/threonine-specific protein phosphatase/bis(5-nucleosyl)-tetraphosphatase	6	0.390371	0.00256312	O00743, P36873, P62140, P67775, Q08209, P62136	1504	13	18559	5.69527	0.997609	0.120524	4.39641
GOTERM_BP_DIRECT	GO:0043153~entrainment of circadian clock by photoperiod	7	0.455433	0.00597774	Q9BWF3, P36873, P62140, Q9BQ04, Q13330, P29590, P62136	1475	20	16792	3.98454	1	0.152689	10.5456
GOTERM_BP_DIRECT	GO:0032922~circadian regulation of gene expression	11	0.71568	0.0253253	Q13547, P43490, O15294, P36873, P62140, P11387, Q9BQG0, Q9BQ04, Q13330, P29590, P62136	1475	57	16792	2.19699	1	0.409688	37.9223
GOTERM_MF_DIRECT	GO:0004722~protein serine/threonine phosphatase activity	11	0.71568	0.0291208	P99999, Q9H0C8, Q9H2U2, O00743, P36873, P62140, Q3ZCQ8, Q14738, Q08209, O15355, P62136	1490	58	16881	2.1487	1	0.347093	38.4329
UP_SEQ_FEATURE	metal ion-binding site:Manganese	7	0.455433	0.0402392	O00743, P22102, P36873, P62140, P04179, P67775, P62136	1520	34	20063	2.71751	1	0.825914	53.3034
GOTERM_BP_DIRECT	GO:0006470~protein dephosphorylation	18	1.17111	0.0491423	Q9H0C8, Q9H2U2, Q96HS1, P62140, P36873, P08575, Q3ZCQ8, Q08209, P35236, O14974, O15355, P62136, P99999, O00743, P67775, Q96GD0, Q14738, P63098	1475	126	16792	1.62634	1	0.587533	60.8047
Annotation Cluster 104	Apoptotic process
Category	Term	Count	%	PValue	Genes	List Total	Pop Hits	Pop Total	Fold Enrichment	Bonferroni	Benjamini	FDR
GOTERM_BP_DIRECT	GO:0043653~mitochondrial fragmentation involved in apoptotic process	5	0.325309	0.00519591	Q96QK1, Q07812, O00429, Q8N163, Q9Y3D6	1475	9	16792	6.32467	1	0.136708	9.22878
Annotation Cluster 105	Regulation
Category	Term	Count	%	PValue	Genes	List Total	Pop Hits	Pop Total	Fold Enrichment	Bonferroni	Benjamini	FDR
GOTERM_CC_DIRECT	GO:0071986~Ragulator complex	4	0.260247	0.00937956	Q6IAA8, Q0VGL1, Q9Y2Q5, Q9UHA4	1511	6	18224	8.04059	0.999568	0.0651413	13.5126
GOTERM_MF_DIRECT	GO:0032947~protein complex scaffold	9	0.585556	0.0216149	Q6IAA8, O14745, Q9BUH6, Q0VGL1, Q9Y2Q5, P63244, Q9NX63, P55884, Q9UHA4	1490	40	16881	2.54914	1	0.29146	30.1377
GOTERM_BP_DIRECT	GO:0016236~macroautophagy	13	0.845804	0.0324287	Q6IAA8, O94826, Q9NS69, Q9H492, P63167, Q9Y2Q5, P60520, O96008, Q9UHA4, Q9HB90, P62979, Q0VGL1, Q9Y4P1	1475	76	16792	1.94733	1	0.468491	45.8136
Annotation Cluster 106	Pore complex
Category	Term	Count	%	PValue	Genes	List Total	Pop Hits	Pop Total	Fold Enrichment	Bonferroni	Benjamini	FDR
GOTERM_CC_DIRECT	GO:0046930~pore complex	4	0.260247	0.032624	Q07812, P45880, O96008, Q9Y277	1511	9	18224	5.36039	1	0.179274	40.0071
UP_KEYWORDS	Porin	3	0.195185	0.0475344	P45880, O96008, Q9Y277	1532	5	20581	8.06044	1	0.165655	50.1657
Annotation Cluster 107	Dynein
Category	Term	Count	%	PValue	Genes	List Total	Pop Hits	Pop Total	Fold Enrichment	Bonferroni	Benjamini	FDR
GOTERM_CC_DIRECT	GO:0005868~cytoplasmic dynein complex	6	0.390371	0.00575356	Q9NP97, Q13409, P63172, Q14204, P63167, P51808	1511	15	18224	4.82435	0.991288	0.0422026	8.50521
UP_KEYWORDS	Dynein	8	0.520494	0.0095599	Q9NP97, Q13409, P63172, Q14204, Q13561, Q14203, P63167, P51808	1532	33	20581	3.25674	0.989667	0.0418326	12.8354
Annotation Cluster 108	Transferase activity
Category	Term	Count	%	PValue	Genes	List Total	Pop Hits	Pop Total	Fold Enrichment	Bonferroni	Benjamini	FDR
GOTERM_MF_DIRECT	GO:0004579~dolichyl-diphosphooligosaccharide-protein glycotransferase activity	6	0.390371	0.00049368	P61803, Q9NRP0, P39656, P04843, P04844, P46977	1490	9	16881	7.55302	0.488084	0.016199	0.807177
GOTERM_CC_DIRECT	GO:0008250~oligosaccharyltransferase complex	6	0.390371	0.000685843	P61803, Q9NRP0, P39656, P04843, P04844, P46977	1511	10	18224	7.23653	0.431046	0.0063881	1.05132
GOTERM_BP_DIRECT	GO:0018279~protein N-linked glycosylation via asparagine	10	0.650618	0.00679356	P61803, P60604, O60762, Q9NYU2, Q9NRP0, P39656, Q9P2X0, P04843, P04844, P46977	1475	40	16792	2.8461	1	0.16648	11.9004
GOTERM_MF_DIRECT	GO:0004576~oligosaccharyl transferase activity	3	0.195185	0.0413538	P61803, P39656, P46977	1490	4	16881	8.49715	1	0.42962	50.0002
Annotation Cluster 109	Mitochondrion
Category	Term	Count	%	PValue	Genes	List Total	Pop Hits	Pop Total	Fold Enrichment	Bonferroni	Benjamini	FDR
GOTERM_BP_DIRECT	GO:0006123~mitochondrial electron transport, cytochrome c to oxygen	6	0.390371	0.0262967	P99999, P13073, P10606, P09669, P00403, O00483	1475	20	16792	3.41532	1	0.416843	39.0623
GOTERM_MF_DIRECT	GO:0004129~cytochrome-c oxidase activity	7	0.455433	0.0440903	P13073, P14406, P10606, P09669, P00167, P00403, O00483	1490	30	16881	2.64356	1	0.447685	52.2919
Annotation Cluster 110	Redox-active center
Category	Term	Count	%	PValue	Genes	List Total	Pop Hits	Pop Total	Fold Enrichment	Bonferroni	Benjamini	FDR
UP_KEYWORDS	Redox-active center	10	0.650618	0.00930615	P25325, Q8IXB1, Q9BRA2, Q9H3N1, O95881, P10599, P30048, Q9BRT3, P09622, Q8IZQ5	1532	49	20581	2.74165	0.988327	0.0411164	12.5155
GOTERM_BP_DIRECT	GO:0045454~cell redox homeostasis	14	0.910865	0.0159802	P27695, Q9H7Z7, P09622, P07203, O95831, Q8IXB1, P04839, Q9H3N1, O95881, P10599, P30048, O76003, Q13423, Q9BS26	1475	77	16792	2.06989	1	0.315936	25.8753
Annotation Cluster 111	Coil
Category	Term	Count	%	PValue	Genes	List Total	Pop Hits	Pop Total	Fold Enrichment	Bonferroni	Benjamini	FDR
INTERPRO	IPR018039:Intermediate filament protein, conserved site	12	0.780742	0.0130559	P13645, P19013, P13647, P13646, P02533, P35527, P35908, P17661, P04264, P08779, P02538, P41219	1504	64	18559	2.31371	1	0.387759	20.5647
UP_SEQ_FEATURE	region of interest:Coil 1B	12	0.780742	0.0229315	P13645, P19013, P13647, P13646, P02533, P35527, P35908, P17661, P04264, P08779, P02538, P41219	1520	74	20063	2.14043	1	0.697397	34.957
UP_SEQ_FEATURE	region of interest:Coil 1A	12	0.780742	0.0229315	P13645, P19013, P13647, P13646, P02533, P35527, P35908, P17661, P04264, P08779, P02538, P41219	1520	74	20063	2.14043	1	0.697397	34.957
UP_SEQ_FEATURE	region of interest:Linker 1	12	0.780742	0.0229315	P13645, P19013, P13647, P13646, P02533, P35527, P35908, P17661, P04264, P08779, P02538, P41219	1520	74	20063	2.14043	1	0.697397	34.957
UP_SEQ_FEATURE	region of interest:Rod	12	0.780742	0.0250989	P13645, P19013, P13647, P13646, P02533, P35527, P35908, P17661, P04264, P08779, P02538, P41219	1520	75	20063	2.11189	1	0.720898	37.5808
UP_KEYWORDS	Intermediate filament	12	0.780742	0.026695	P13645, P19013, P13647, P13646, P02533, P35527, P35908, P17661, P04264, P08779, P02538, P41219	1532	77	20581	2.09362	0.999997	0.103403	32.0874
UP_SEQ_FEATURE	region of interest:Head	12	0.780742	0.0298728	P13645, P19013, P13647, P13646, P02533, P35527, P35908, P17661, P04264, P08779, P02538, P41219	1520	77	20063	2.05704	1	0.769207	43.0109
UP_SEQ_FEATURE	region of interest:Linker 12	11	0.71568	0.0312961	P13645, P19013, P13647, P13646, P02533, P35527, P35908, P17661, P04264, P08779, P02538	1520	68	20063	2.13519	1	0.776908	44.5413
UP_SEQ_FEATURE	region of interest:Coil 2	11	0.71568	0.0312961	P13645, P19013, P13647, P13646, P02533, P35527, P35908, P04264, P08779, P02538, P41219	1520	68	20063	2.13519	1	0.776908	44.5413
UP_SEQ_FEATURE	region of interest:Tail	12	0.780742	0.0352623	P13645, P19013, P13647, P13646, P02533, P35527, P35908, P17661, P04264, P08779, P02538, P41219	1520	79	20063	2.00496	1	0.7976	48.6036
PFAM	PF00038:Intermediate filament protein	12	0.780742	0.0469557	P13645, P19013, P13647, P13646, P02533, P35527, P35908, P17661, P04264, P08779, P02538, P41219	1444	76	17475	1.91081	1	0.753481	54.2337
INTERPRO	IPR001664:Intermediate filament protein	12	0.780742	0.049049	P13645, P19013, P13647, P13646, P02533, P35527, P35908, P17661, P04264, P08779, P02538, P41219	1504	78	18559	1.89842	1	0.735281	58.5656
Annotation Cluster 112	Chaperone
Category	Term	Count	%	PValue	Genes	List Total	Pop Hits	Pop Total	Fold Enrichment	Bonferroni	Benjamini	FDR
INTERPRO	IPR002939:Chaperone DnaJ, C-terminal	4	0.260247	0.0307289	P31689, Q9UBS4, O60884, P25685	1504	9	18559	5.48434	1	0.609813	42.1185
INTERPRO	IPR008971:HSP40/DnaJ peptide-binding	4	0.260247	0.0307289	P31689, Q9UBS4, O60884, P25685	1504	9	18559	5.48434	1	0.609813	42.1185
PFAM	PF01556:DnaJ C terminal domain	4	0.260247	0.0323322	P31689, Q9UBS4, O60884, P25685	1444	9	17475	5.37858	1	0.661375	41.383
GOTERM_BP_DIRECT	GO:0032781~positive regulation of ATPase activity	7	0.455433	0.0497566	Q8IXB1, Q99615, Q9UBS4, P60520, P25685, O95433, Q8WXX5	1475	31	16792	2.57067	1	0.59059	61.2727
Annotation Cluster 113	NuRD complex
Category	Term	Count	%	PValue	Genes	List Total	Pop Hits	Pop Total	Fold Enrichment	Bonferroni	Benjamini	FDR
GOTERM_CC_DIRECT	GO:0016581~NuRD complex	6	0.390371	0.0133258	Q13547, Q09028, O94776, Q86YP4, Q8WXI9, P68400	1511	18	18224	4.0203	0.999984	0.0871066	18.6705
Annotation Cluster 114	PUA
Category	Term	Count	%	PValue	Genes	List Total	Pop Hits	Pop Total	Fold Enrichment	Bonferroni	Benjamini	FDR
UP_SEQ_FEATURE	domain:PUA	3	0.195185	0.0491046	Q9ULC4, O60832, P41214	1520	5	20063	7.91961	1	0.871767	60.6847
Annotation Cluster 115	Cell cycle
Category	Term	Count	%	PValue	Genes	List Total	Pop Hits	Pop Total	Fold Enrichment	Bonferroni	Benjamini	FDR
GOTERM_BP_DIRECT	GO:1902188~positive regulation of viral release from host cell	6	0.390371	0.00152325	Q16531, O43633, O75351, Q9UQN3, Q9H444, Q9H9H4	1475	11	16792	6.20968	0.997776	0.0504482	2.79364
GOTERM_BP_DIRECT	GO:0010824~regulation of centrosome duplication	6	0.390371	0.021217	Q9UHD1, O43633, O75351, Q9UQN3, O14980, Q9H444	1475	19	16792	3.59508	1	0.374729	32.8743
GOTERM_BP_DIRECT	GO:0007080~mitotic metaphase plate congression	8	0.520494	0.0395328	Q14974, O43633, O75351, Q9UQN3, Q9BW19, Q13618, Q9H444, P62491	1475	37	16792	2.46149	1	0.523551	52.7498
GOTERM_BP_DIRECT	GO:0036258~multivesicular body assembly	7	0.455433	0.0497566	Q9NP79, O43633, O75351, Q9UQN3, Q9H444, P62491, Q9H9H4	1475	31	16792	2.57067	1	0.59059	61.2727
GOTERM_BP_DIRECT	GO:0019058~viral life cycle	7	0.455433	0.0497566	Q9NP79, P62979, O43633, O75351, Q9UQN3, Q9H444, Q9H9H4	1475	31	16792	2.57067	1	0.59059	61.2727
Annotation Cluster 116	SANT/Myb domain
Category	Term	Count	%	PValue	Genes	List Total	Pop Hits	Pop Total	Fold Enrichment	Bonferroni	Benjamini	FDR
INTERPRO	IPR001005:SANT/Myb domain	9	0.585556	0.0205363	Q99459, Q15554, Q15910, Q8TAQ2, O75376, O94776, Q92922, Q13330, O60264	1504	43	18559	2.58274	1	0.492286	30.477
Annotation Cluster 117	Matrin
Category	Term	Count	%	PValue	Genes	List Total	Pop Hits	Pop Total	Fold Enrichment	Bonferroni	Benjamini	FDR
UP_SEQ_FEATURE	zinc finger region:Matrin-type	4	0.260247	0.0347302	Q15428, Q96NC0, Q9ULV3, P43243	1520	10	20063	5.27974	1	0.800023	48.0754
Annotation Cluster 118	Interferon
Category	Term	Count	%	PValue	Genes	List Total	Pop Hits	Pop Total	Fold Enrichment	Bonferroni	Benjamini	FDR
GOTERM_BP_DIRECT	GO:0060337~type I interferon signaling pathway	14	0.910865	0.00329508	P42224, Q02556, P01892, P13164, Q9Y3Z3, P30443, P18462, P01889, P29728, P20592, P28062, P20591, P80217, Q96AZ6, P23497, P30460, Q10589	1475	64	16792	2.49034	0.999998	0.0939813	5.95028
Annotation Cluster 119	Reactive oxygen species
Category	Term	Count	%	PValue	Genes	List Total	Pop Hits	Pop Total	Fold Enrichment	Bonferroni	Benjamini	FDR
GOTERM_BP_DIRECT	GO:0000302~response to reactive oxygen species	9	0.585556	0.0182025	P99999, P04839, P00441, P04179, P10599, P30048, P62995, P04040, P07203	1475	39	16792	2.62717	1	0.337162	28.9258
Annotation Cluster 120	SH3 binding
Category	Term	Count	%	PValue	Genes	List Total	Pop Hits	Pop Total	Fold Enrichment	Bonferroni	Benjamini	FDR
UP_KEYWORDS	SH3-binding	10	0.650618	0.0425784	Q92556, Q92835, Q9UI08, Q07666, Q96B97, Q07960, Q9Y5K6, O75368, Q68EM7, P42566	1532	63	20581	2.13239	1	0.151578	46.3264
Annotation Cluster 121	Fatty acid elongation
Category	Term	Count	%	PValue	Genes	List Total	Pop Hits	Pop Total	Fold Enrichment	Bonferroni	Benjamini	FDR
KEGG_PATHWAY	hsa00062:Fatty acid elongation	8	0.520494	0.0276723	Q9NZ01, Q9BW60, P30084, P40939, P55084, Q16836, O00154, Q53GQ0	854	25	6910	2.58923	0.999516	0.123311	30.8845
Annotation Cluster 122	GST
Category	Term	Count	%	PValue	Genes	List Total	Pop Hits	Pop Total	Fold Enrichment	Bonferroni	Benjamini	FDR
UP_SEQ_FEATURE	domain:GST C-terminal	8	0.520494	0.0194232	P26640, P56192, Q9Y696, Q13155, P78417, O43324, Q9H7Z7, O43708	1520	37	20063	2.85391	1	0.650826	30.4877
Annotation Cluster 123	COMPASS complex
Category	Term	Count	%	PValue	Genes	List Total	Pop Hits	Pop Total	Fold Enrichment	Bonferroni	Benjamini	FDR
GOTERM_CC_DIRECT	GO:0048188~Set1C/COMPASS complex	5	0.325309	0.00964289	Q6UXN9, Q15291, P61964, P51610, O15047	1511	11	18224	5.48222	0.999653	0.0652716	13.8661
Annotation Cluster 124	Fatty acid degradation
Category	Term	Count	%	PValue	Genes	List Total	Pop Hits	Pop Total	Fold Enrichment	Bonferroni	Benjamini	FDR
UP_SEQ_FEATURE	site:Important for catalytic activity	5	0.325309	0.0134432	Q96KP4, P30084, P42126, P40939, Q16836	1520	13	20063	5.07667	1	0.552034	22.193
KEGG_PATHWAY	hsa00071:Fatty acid degradation	11	0.71568	0.0385018	P49748, P49189, P23786, P30084, P42126, P40939, P55084, P09110, P11766, Q16836, P05091	854	44	6910	2.02283	0.999977	0.15823	40.3587
Annotation Cluster 125	Tetratricopeptide repeat
Category	Term	Count	%	PValue	Genes	List Total	Pop Hits	Pop Total	Fold Enrichment	Bonferroni	Benjamini	FDR
INTERPRO	IPR011990:Tetratricopeptide-like helical	28	1.82173	0.0177667	O43242, Q02790, P31948, Q13451, P49792, Q13098, P50502, Q00610, O43765, Q9H3U1, O14579, O94826, O15294, O94906, Q8N5M4, Q96DB5, Q9Y2Z0, Q9Y262, O76094, Q99615, Q15020, P42704, Q9BXJ9, Q15008, Q12996, Q15006, P54920, Q9Y3D6	1504	218	18559	1.58492	1	0.462079	26.9515
PFAM	PF13181:Tetratricopeptide repeat	11	0.71568	0.0216659	O76094, Q99615, O94826, O15294, O94906, P50502, Q9BXJ9, P31948, Q13451, Q9H3U1, O43765	1444	59	17475	2.25627	1	0.564399	29.9517
INTERPRO	IPR001440:Tetratricopeptide TPR-1	7	0.455433	0.0223886	Q99615, O94826, O15294, Q02790, P31948, Q13451, O43765	1504	28	18559	3.08494	1	0.508397	32.7446
PFAM	PF00515:Tetratricopeptide repeat	7	0.455433	0.0243908	Q99615, O94826, O15294, Q02790, P31948, Q13451, O43765	1444	28	17475	3.02545	1	0.576319	33.056
Annotation Cluster 126	Chromo shadow domain
Category	Term	Count	%	PValue	Genes	List Total	Pop Hits	Pop Total	Fold Enrichment	Bonferroni	Benjamini	FDR
INTERPRO	IPR008251:Chromo shadow domain	3	0.195185	0.0186033	P83916, P45973, Q13185	1504	3	18559	12.3398	1	0.472762	28.0338
PFAM	PF01393:Chromo shadow domain	3	0.195185	0.019319	P83916, P45973, Q13185	1444	3	17475	12.1018	1	0.545189	27.1702
UP_SEQ_FEATURE	domain:Chromo 2; shadow subtype	3	0.195185	0.0310051	P83916, P45973, Q13185	1520	4	20063	9.89951	1	0.777787	44.2316
Annotation Cluster 127	Vesicle transport
Category	Term	Count	%	PValue	Genes	List Total	Pop Hits	Pop Total	Fold Enrichment	Bonferroni	Benjamini	FDR
GOTERM_BP_DIRECT	GO:1903076~regulation of protein localization to plasma membrane	5	0.325309	0.0031011	Q01082, O15400, Q9BV40, P32455, Q9UEU0	1475	8	16792	7.11525	0.999996	0.0899752	5.60948
GOTERM_BP_DIRECT	GO:0006892~post-Golgi vesicle-mediated transport	6	0.390371	0.021217	O00161, P63027, Q9BV40, P36405, Q8WVM8, P84077	1475	19	16792	3.59508	1	0.374729	32.8743
Annotation Cluster 128	COPI
Category	Term	Count	%	PValue	Genes	List Total	Pop Hits	Pop Total	Fold Enrichment	Bonferroni	Benjamini	FDR
GOTERM_BP_DIRECT	GO:0048205~COPI coating of Golgi vesicle	3	0.195185	0.0409798	P49755, Q9BVK6, Q15363	1475	4	16792	8.53831	1	0.533322	54.0555
Annotation Cluster 129	SH2 domain
Category	Term	Count	%	PValue	Genes	List Total	Pop Hits	Pop Total	Fold Enrichment	Bonferroni	Benjamini	FDR
UP_KEYWORDS	SH2 domain	15	0.975927	0.029228	P27986, P51451, Q92835, P46109, P42224, P16885, P43405, P41240, P08631, Q06187, Q13588, Q8WV28, P42229, P40763, P07948	1532	108	20581	1.86584	0.999999	0.110142	34.5716
PFAM	PF00017:SH2 domain	15	0.975927	0.0351568	P27986, P51451, Q92835, P46109, P42224, P16885, P43405, P41240, P08631, Q06187, Q13588, Q8WV28, P42229, P40763, P07948	1444	100	17475	1.81527	1	0.683028	44.1027

## Sheet: 419_CB_CC_M
Annotation Cluster 1	Mitochondrion												Mitochondrion
Category	Term	Count	%	PValue	Genes	List Total	Pop Hits	Pop Total	Fold Enrichment	Bonferroni	Benjamini	FDR	Cell-cell adhesion
GOTERM_CC_DIRECT	GO:0005739~mitochondrion	72	17.3077	1.36466e-12	Q96T60, O43615, Q9ULZ2, P26440, Q96EY1, Q9NP81, Q8TAE8, Q9BZE1, P82675, Q13342, Q9BRJ2, Q9Y3I1, Q9UQM7, Q7Z7H8, P36543, P10415, Q96Q11, Q5T1C6, Q96C36, P10515, P11182, P30536, O43837, Q9NP92, Q9NQ50, Q9H061, Q92665, Q6JQN1, Q6PI48, O00116, Q9NWB6, P12694, Q9BUT1, P56378, P10909, Q9BUB7, Q6YN16, Q9BXW7, Q9Y606, Q8NCW5, Q9BYD3, Q02750, Q6UB35, P33121, P30837, Q96RQ3, O43464, P51398, O15381, Q969S9,…	398	1331	18224	2.47694	5.63615e-10	1.87872e-10	1.91233e-09	Nucleotide binding
UP_KEYWORDS	Mitochondrion	57	13.7019	2.59424e-10	O43615, Q9ULZ2, P26440, Q96EY1, Q9NP81, Q8TAE8, Q9BZE1, P82675, Q9BRJ2, Q8NFF5, Q9Y3I1, Q7Z7H8, P10415, Q96Q11, Q13057, Q5T1C6, Q96C36, P10515, P11182, O43837, P30536, Q9NP92, Q9NQ50, Q9H061, Q92665, Q6PI48, P12694, P56378, P10909, Q9BUB7, Q9Y606, Q8NCW5, Q9BYD3, Q6UB35, P33121, Q8NCN5, P30837, Q96RQ3, Q15785, Q5T653, O43464, P51398, Q5JRX3, Q969S9, O75746, P29372, Q92947, O75880, O95182, Q9UJS0,…	414	1119	20581	2.53228	8.24969e-08	2.06242e-08	3.49748e-07	RNA processing
UP_KEYWORDS	Transit peptide	36	8.65385	1.02081e-09	Q9Y606, O43615, Q8NCW5, P26440, Q96EY1, Q9NP81, Q6UB35, Q8NCN5, P30837, Q9BZE1, Q96RQ3, Q5T653, O43464, Q9BRJ2, Q8NFF5, P51398, Q5JRX3, Q969S9, P29372, Q92947, Q7Z7H8, O75880, Q96Q11, Q8IW45, Q5T1C6, P43304, P10515, P11182, O43837, Q9NQ50, Q92665, Q6PI48, O00116, P12694, Q9BUB7, Q96HY7	414	536	20581	3.3389	3.24616e-07	4.63737e-08	1.37622e-06	RNA processing
GOTERM_CC_DIRECT	GO:0005759~mitochondrial matrix	28	6.73077	3.40161e-09	Q9Y606, O43615, Q8NCW5, P26440, Q96EY1, Q9NP81, Q8TAE8, Q6UB35, Q8NCN5, P30837, Q96RQ3, Q8NFF5, Q5JRX3, Q969S9, Q92947, Q8IW45, Q96Q11, Q13057, Q5T1C6, Q96C36, P10515, P11182, O43837, Q6JQN1, Q6PI48, P12694, P04818, Q96HY7	398	327	18224	3.92077	1.40486e-06	2.34144e-07	4.76666e-06	WD repeat
UP_SEQ_FEATURE	transit peptide:Mitochondrion	29	6.97115	7.61206e-07	O43615, P26440, Q96EY1, Q9NP81, Q6UB35, Q8NCN5, P30837, Q9BZE1, Q96RQ3, Q5T653, O43464, Q9BRJ2, P51398, Q5JRX3, Q969S9, Q92947, Q7Z7H8, O75880, Q96Q11, P43304, P10515, P11182, O43837, Q9NQ50, Q92665, Q6PI48, P12694, Q9BUB7, Q96HY7	410	482	20063	2.94417	0.000950295	0.000950295	0.00123674	Mitochondrion
													Ribosome biogenesis
Annotation Cluster 2	Cell-cell adhesion												RNA transport
Category	Term	Count	%	PValue	Genes	List Total	Pop Hits	Pop Total	Fold Enrichment	Bonferroni	Benjamini	FDR	Biosynthesis
GOTERM_BP_DIRECT	GO:0098609~cell-cell adhesion	21	5.04808	5.90543e-06	Q9UGI8, P49959, Q01813, Q9Y6E0, Q9Y6E2, Q9UDY2, Q9Y6W5, Q9Y371, P55010, Q9UBC2, P20810, Q08378, Q13492, O75874, O95372, Q9NWB6, Q96AG4, Q15907, Q14C86, Q14258, P53990	392	271	16792	3.31945	0.0104566	0.00262447	0.0100147	GTPase activity
GOTERM_CC_DIRECT	GO:0005913~cell-cell adherens junction	22	5.28846	8.99184e-06	Q9UGI8, Q14254, P49959, Q01813, Q9Y6E0, Q9Y6E2, Q9UDY2, Q9Y6W5, Q9Y371, P55010, Q9UBC2, P20810, Q08378, Q13492, O75874, O95372, Q9NWB6, Q96AG4, Q15907, Q14C86, Q14258, P53990	398	323	18224	3.11875	0.00370676	0.000412542	0.0125995	Transport
GOTERM_MF_DIRECT	GO:0098641~cadherin binding involved in cell-cell adhesion	21	5.04808	1.92944e-05	Q9UGI8, P49959, Q01813, Q9Y6E0, Q9Y6E2, Q9UDY2, Q9Y6W5, Q9Y371, P55010, Q9UBC2, P20810, Q08378, Q13492, O75874, O95372, Q9NWB6, Q96AG4, Q15907, Q14C86, Q14258, P53990	399	290	16881	3.0637	0.0111476	0.00223952	0.0283671	G-path
													Vesicle transport
Annotation Cluster 3	Nucleotide binding												Importin
Category	Term	Count	%	PValue	Genes	List Total	Pop Hits	Pop Total	Fold Enrichment	Bonferroni	Benjamini	FDR	Dehydrogenase
UP_KEYWORDS	RNA-binding	41	9.85577	7.01608e-10	Q9H2U1, Q8IXT5, Q01085, Q9NX07, Q96MU7, Q9Y5A9, O95319, Q9BTD8, Q9Y224, Q9UIV1, Q9NV31, Q9Y3A4, Q01780, Q96T37, P10155, Q86U06, Q96Q11, P00374, O14979, Q10570, Q5RKV6, Q13310, Q14966, Q92615, O95218, Q9BYG3, Q96I25, P51003, Q8IY67, Q9UN86, Q13601, Q9UBU9, Q96SI9, O43148, Q8IWZ3, P42696, Q71RC2, Q9BQ39, Q9NW13, Q9UKK9, P21399	414	665	20581	3.06498	2.23111e-07	4.46223e-08	9.45887e-07	Proteasome
INTERPRO	IPR012677:Nucleotide-binding, alpha-beta plait	22	5.28846	3.46594e-07	O14979, Q8IXT5, Q01085, Q13310, Q14966, Q9NX07, Q92615, Q9BYG3, Q96I25, O95319, Q8IY67, Q9UN86, Q9BTD8, Q9UBU9, P42696, Q71RC2, Q8WXA9, Q9Y3A4, Q96T37, Q9BQ39, Q9NW13, Q86U06	404	264	18559	3.82818	0.000313619	0.000313619	0.000540638	BAR domain
GOTERM_MF_DIRECT	GO:0000166~nucleotide binding	25	6.00962	2.8583e-06	Q8IXT5, Q01085, Q9NX07, Q8NCW5, O95319, Q9BTD8, Q96T37, Q01780, Q9Y3A4, Q86U06, O14979, Q13310, Q92615, Q14966, Q96I25, Q9BYG3, P09884, Q8IY67, Q9UN86, Q9UBU9, P42696, Q71RC2, Q8WXA9, P04818, Q9NW13	399	348	16881	3.03939	0.0016593	0.000415083	0.00420282	Clathrin
SMART	SM00360:RRM	16	3.84615	2.76372e-05	O14979, Q8IXT5, Q01085, Q13310, Q9NX07, Q14966, Q9BYG3, O95319, Q8IY67, Q9UN86, Q9BTD8, P42696, Q8WXA9, Q96T37, Q9NW13, Q86U06	206	212	10057	3.68456	0.0047974	0.0047974	0.033844	Cell cycle metabolism
INTERPRO	IPR000504:RNA recognition motif domain	17	4.08654	3.68865e-05	O14979, Q8IXT5, Q01085, Q13310, Q14966, Q9NX07, Q96I25, Q9BYG3, O95319, Q8IY67, Q9UN86, Q9BTD8, P42696, Q8WXA9, Q96T37, Q9NW13, Q86U06	404	226	18559	3.45552	0.0328318	0.0165529	0.0575224	NAD
UP_SEQ_FEATURE	domain:RRM 2	12	2.88462	5.11716e-05	O14979, Q8IXT5, Q01085, P42696, Q13310, Q14966, Q9NX07, Q96T37, O95319, Q9NW13, Q8IY67, Q86U06	410	125	20063	4.69768	0.0619152	0.0314522	0.083107	UBA
UP_SEQ_FEATURE	domain:RRM 1	12	2.88462	5.11716e-05	O14979, Q8IXT5, Q01085, P42696, Q13310, Q14966, Q9NX07, Q96T37, O95319, Q9NW13, Q8IY67, Q86U06	410	125	20063	4.69768	0.0619152	0.0314522	0.083107	Endocytosis
UP_SEQ_FEATURE	domain:RRM 3	7	1.68269	0.00149183	Q8IXT5, Q01085, Q13310, Q96T37, O95319, Q9NW13, Q8IY67	410	61	20063	5.61539	0.845055	0.207914	2.39643	Transport
UP_SEQ_FEATURE	domain:RRM	9	2.16346	0.00653137	Q9BTD8, Q9UBU9, Q71RC2, Q8WXA9, Q92615, Q9Y3A4, Q9BYG3, Q96I25, Q9UN86	410	135	20063	3.26228	0.999721	0.52481	10.0993	Lipid transport
GOTERM_MF_DIRECT	GO:0003676~nucleic acid binding	24	5.76923	0.550345	O14979, Q9H2U1, Q8IXT5, Q01085, Q10570, Q92917, Q13310, Q14966, Q9BYG3, Q96I25, O95319, P25490, Q8IY67, Q9UN86, Q13822, Q6PI48, Q9BTD8, P42696, Q8WXA9, Q9BTE6, Q9UIV1, Q96T37, Q9NW13, Q86U06	399	985	16881	1.03086	1	0.997954	99.9992	Cell cycle
													PH domain
Annotation Cluster 4	RNA processing												Kinase
Category	Term	Count	%	PValue	Genes	List Total	Pop Hits	Pop Total	Fold Enrichment	Bonferroni	Benjamini	FDR	Bromo domain
UP_KEYWORDS	rRNA processing	11	2.64423	8.644e-06	Q13601, P42285, Q5RKV6, Q14137, Q8IY81, Q01780, Q9Y2W2, Q8NI36, Q9NV31, Q9GZL7, O00566	414	86	20581	6.35858	0.00274503	0.000211424	0.011653	Kinetochore
UP_KEYWORDS	Ribosome biogenesis	8	1.92308	0.000318284	Q13601, O15381, Q14137, Q8IY81, Q8NI36, Q9NV31, Q9GZL7, O00566	414	65	20581	6.11847	0.0962754	0.00560814	0.42825	Metabolism
GOTERM_BP_DIRECT	GO:0006364~rRNA processing	13	3.125	0.00448115	Q5RKV6, Q9Y2W2, P57678, O00566, P42285, Q13601, Q14137, Q01780, Q9Y3A4, Q9NV31, Q8NI36, Q15269, Q9GZL7	392	214	16792	2.60223	0.999663	0.459333	7.33391	KH domain
GOTERM_CC_DIRECT	GO:0032040~small-subunit processome	5	1.20192	0.00681296	Q13601, Q8NI36, Q9NV31, Q15269, O00566	398	35	18224	6.54128	0.940595	0.125801	9.13511	Ion transport
													Immunity/Complement activation
Annotation Cluster 5	RNA processing												NF-kappa signaling pathway
Category	Term	Count	%	PValue	Genes	List Total	Pop Hits	Pop Total	Fold Enrichment	Bonferroni	Benjamini	FDR	Helicase
UP_KEYWORDS	mRNA processing	23	5.52885	1.10254e-06	Q96ST2, Q10570, Q8IX01, Q8NAV1, Q99590, Q96MU7, Q13573, O95400, O95218, Q9Y2W2, Q96I25, O95926, O95319, P51003, P57678, Q69YN4, Q96BP3, O43172, P42285, O43148, Q8WXA9, Q53GS9, Q9NW13	414	332	20581	3.44394	0.000350546	3.50601e-05	0.0014864	MHC I/Immunoglobulin
UP_KEYWORDS	mRNA splicing	19	4.56731	5.74155e-06	Q96ST2, Q8IX01, Q8NAV1, Q99590, Q96MU7, Q13573, O95400, O95218, Q9Y2W2, Q96I25, O95926, P57678, Q69YN4, Q96BP3, O43172, P42285, Q8WXA9, Q53GS9, Q9NW13	414	260	20581	3.63284	0.00182415	0.00015214	0.00774031	BCR signaling pathway
GOTERM_BP_DIRECT	GO:0008380~RNA splicing	13	3.125	0.000521984	Q96ST2, Q8IX01, Q8NAV1, Q99590, Q14966, O95218, Q9Y2W2, Q69YN4, O00566, O43172, Q8WXA9, Q53GS9, Q9NW13	392	166	16792	3.35468	0.605199	0.143496	0.881566	Viral activity
UP_KEYWORDS	Spliceosome	10	2.40385	0.00106729	P42285, Q8NAV1, Q8WXA9, Q13573, O95926, Q96I25, Q9NW13, Q53GS9, Q96BP3, O43172	414	127	20581	3.91437	0.287929	0.0160403	1.42934	ANK repeat
GOTERM_CC_DIRECT	GO:0005681~spliceosomal complex	8	1.92308	0.00445611	O14979, Q8WXA9, Q13573, Q9Y2W2, Q96I25, Q9NW13, Q53GS9, O43172	398	94	18224	3.89693	0.841893	0.10282	6.06648	tRNA synthetase
GOTERM_BP_DIRECT	GO:0006397~mRNA processing	11	2.64423	0.00930959	Q96ST2, Q8IX01, Q8NAV1, Q8WXA9, Q99590, O95218, O95319, Q9NW13, Q53GS9, Q69YN4, Q86U06	392	179	16792	2.63243	1	0.547422	14.6682	AGC kinase
KEGG_PATHWAY	hsa03040:Spliceosome	8	1.92308	0.0942148	Q8NAV1, Q13573, Q9Y2W2, O95926, Q96I25, Q53GS9, Q8IWX8, O43172	203	133	6910	2.04748	1	0.694998	71.5178	Mitochondrial respiratory complex
													EF-hand
Annotation Cluster 6	WD repeat												SH3 domain
Category	Term	Count	%	PValue	Genes	List Total	Pop Hits	Pop Total	Fold Enrichment	Bonferroni	Benjamini	FDR	Thiol protease
SMART	SM00320:WD40	17	4.08654	0.000110734	Q13685, Q92747, P63151, Q9BQ67, P78406, Q8NFH3, Q9Y263, O75717, Q96BP3, O43172, P57081, Q14137, Q8NI36, Q9BZK7, P61962, Q15269, Q9GZL7	206	267	10057	3.10841	0.0190843	0.00958809	0.135539	Tyrosine-protein kinase
UP_KEYWORDS	WD repeat	17	4.08654	0.000191752	Q13685, Q92747, P63151, Q9BQ67, P78406, Q8NFH3, Q9Y263, O75717, Q96BP3, O43172, P57081, Q14137, Q8NI36, Q9BZK7, P61962, Q15269, Q9GZL7	414	281	20581	3.00752	0.0591607	0.00380418	0.258205	GDP binding
UP_SEQ_FEATURE	repeat:WD 4	16	3.84615	0.000251276	Q13685, Q92747, P63151, Q9BQ67, P78406, Q8NFH3, Q9Y263, O75717, Q96BP3, O43172, P57081, Q14137, Q8NI36, Q9BZK7, P61962, Q9GZL7	410	255	20063	3.07038	0.269395	0.0993401	0.407471	Transcription
INTERPRO	IPR001680:WD40 repeat	17	4.08654	0.00026912	Q13685, Q92747, P63151, Q9BQ67, P78406, Q8NFH3, Q9Y263, O75717, Q96BP3, O43172, P57081, Q14137, Q8NI36, Q9BZK7, P61962, Q15269, Q9GZL7	404	268	18559	2.91399	0.216188	0.0590794	0.418966	Cell junction
UP_SEQ_FEATURE	repeat:WD 3	16	3.84615	0.000442809	Q13685, Q92747, P63151, Q9BQ67, P78406, Q8NFH3, Q9Y263, O75717, Q96BP3, O43172, P57081, Q14137, Q8NI36, Q9BZK7, P61962, Q9GZL7	410	269	20063	2.91058	0.424888	0.104737	0.717016	Actin-binding
UP_SEQ_FEATURE	repeat:WD 1	16	3.84615	0.000623387	Q13685, Q92747, P63151, Q9BQ67, P78406, Q8NFH3, Q9Y263, O75717, Q96BP3, O43172, P57081, Q14137, Q8NI36, Q9BZK7, P61962, Q9GZL7	410	278	20063	2.81635	0.541068	0.121737	1.00803	Signaling pathway
UP_SEQ_FEATURE	repeat:WD 2	16	3.84615	0.000623387	Q13685, Q92747, P63151, Q9BQ67, P78406, Q8NFH3, Q9Y263, O75717, Q96BP3, O43172, P57081, Q14137, Q8NI36, Q9BZK7, P61962, Q9GZL7	410	278	20063	2.81635	0.541068	0.121737	1.00803	zinc finger region:RING-type
INTERPRO	IPR015943:WD40/YVTN repeat-like-containing domain	18	4.32692	0.000971639	Q13685, Q92747, P63151, Q9BQ67, P78406, Q8NFH3, Q9Y263, O75717, Q96BP3, O43172, P57081, Q14137, Q8NI36, Q9BZK7, P61962, Q15269, Q9GZL7, Q13228	404	331	18559	2.49815	0.585118	0.161342	1.50492	Zinc ion binding
INTERPRO	IPR019775:WD40 repeat, conserved site	12	2.88462	0.00103089	Q13685, Q14137, Q9BQ67, Q9BZK7, Q8NI36, P78406, Q8NFH3, P61962, Q15269, Q9GZL7, O75717, O43172	404	166	18559	3.32083	0.6068	0.144075	1.596	SPRY
INTERPRO	IPR017986:WD40-repeat-containing domain	17	4.08654	0.00113164	Q13685, Q92747, P63151, Q9BQ67, P78406, Q8NFH3, Q9Y263, O75717, Q96BP3, O43172, P57081, Q14137, Q8NI36, Q9BZK7, P61962, Q15269, Q9GZL7	404	306	18559	2.55212	0.641103	0.136178	1.7507	GTPase activation
UP_SEQ_FEATURE	repeat:WD 6	11	2.64423	0.00711343	Q13685, Q92747, P63151, Q14137, Q9BZK7, Q8NI36, Q8NFH3, Q9Y263, Q9GZL7, O75717, O43172	410	196	20063	2.7463	0.999866	0.524332	10.9512	Complement activation
UP_SEQ_FEATURE	repeat:WD 5	12	2.88462	0.00965796	Q13685, Q92747, P63151, Q14137, Q9BQ67, Q9BZK7, Q8NI36, Q8NFH3, Q9Y263, Q9GZL7, O75717, O43172	410	237	20063	2.47768	0.999995	0.606399	14.5875	PI3K-AKT signaling pathway
UP_SEQ_FEATURE	repeat:WD 7	9	2.16346	0.0123999	Q13685, P63151, Q14137, Q9BZK7, Q8NI36, Q9Y263, Q9GZL7, O75717, O43172	410	151	20063	2.9166	1	0.646176	18.3496	RNA polymerase II
INTERPRO	IPR020472:G-protein beta WD-40 repeat	7	1.68269	0.0158121	Q9BQ67, Q9BZK7, P78406, Q15269, Q9Y263, Q9GZL7, O43172	404	93	18559	3.45771	0.999999	0.730531	22.0123	Repeat
													TPR repeat
Annotation Cluster 7	Mitochondrion												Transmembrane
Category	Term	Count	%	PValue	Genes	List Total	Pop Hits	Pop Total	Fold Enrichment	Bonferroni	Benjamini	FDR	Disulfide bond
GOTERM_BP_DIRECT	GO:0070125~mitochondrial translational elongation	12	2.88462	4.31692e-06	Q5T653, Q9BRJ2, P51398, Q969S9, Q9BYD3, Q7Z7H8, Q9NP92, Q8TAE8, Q9NQ50, Q92665, Q9BZE1, P82675	392	85	16792	6.04754	0.00765468	0.00383469	0.0073209
GOTERM_BP_DIRECT	GO:0070126~mitochondrial translational termination	12	2.88462	4.84816e-06	Q5T653, Q9BRJ2, P51398, Q969S9, Q9BYD3, Q7Z7H8, Q9NP92, Q8TAE8, Q9NQ50, Q92665, Q9BZE1, P82675	392	86	16792	5.97722	0.00859261	0.00287245	0.00822178
GOTERM_CC_DIRECT	GO:0005743~mitochondrial inner membrane	24	5.76923	0.000108997	Q5T1C6, O43615, P43304, Q9BYD3, Q9NP92, Q9H061, Q9NQ50, Q92665, Q96CU9, Q9BZE1, P82675, Q96RQ3, Q9BRJ2, Q5T653, P17568, P51398, Q96LJ7, O75746, P04818, Q9BUB7, Q7Z7H8, O75880, O95182, Q9UJS0	398	441	18224	2.49192	0.0440198	0.00449169	0.152628
UP_KEYWORDS	Ribonucleoprotein	17	4.08654	0.00034313	O14979, Q15349, Q9BYD3, Q9NP92, Q8ND56, Q92665, Q9NQ50, O00566, Q9BZE1, P82675, Q9BRJ2, Q5T653, Q13601, P51398, Q9NV31, P10155, Q7Z7H8	414	296	20581	2.85511	0.10339	0.00572743	0.461608
UP_KEYWORDS	Ribosomal protein	11	2.64423	0.0042884	Q5T653, Q9BRJ2, P51398, Q15349, Q9BYD3, Q7Z7H8, Q9NP92, Q9NQ50, Q92665, Q9BZE1, P82675	414	185	20581	2.95588	0.745038	0.0476367	5.62927
GOTERM_MF_DIRECT	GO:0003735~structural constituent of ribosome	12	2.88462	0.0164995	Q5T653, P51398, O75746, Q9NV31, Q9BYD3, Q7Z7H8, Q9NP92, Q92665, O95182, Q9BZE1, Q9UJS0, P82675	399	222	16881	2.28693	0.999937	0.498645	21.701
GOTERM_CC_DIRECT	GO:0005762~mitochondrial large ribosomal subunit	4	0.961538	0.0866033	Q5T653, Q9BYD3, Q7Z7H8, Q9BZE1	398	48	18224	3.81575	1	0.607528	71.899
GOTERM_CC_DIRECT	GO:0005840~ribosome	7	1.68269	0.155102	Q5T653, Q9BRJ2, Q15349, Q9BYD3, Q7Z7H8, Q9NP92, Q9BZE1	398	166	18224	1.93086	1	0.758417	90.5743
GOTERM_BP_DIRECT	GO:0006412~translation	9	2.16346	0.238108	Q5T653, Q13310, O75746, Q9BYD3, Q7Z7H8, Q9NP92, Q9BZE1, Q9UJS0, P82675	392	253	16792	1.52384	1	0.987731	99.0069
KEGG_PATHWAY	hsa03010:Ribosome	4	0.961538	0.765535	Q5T653, Q9BYD3, Q7Z7H8, P82675	203	136	6910	1.00116	1	0.986319	100
Annotation Cluster 8	Ribosome biogenesis
Category	Term	Count	%	PValue	Genes	List Total	Pop Hits	Pop Total	Fold Enrichment	Bonferroni	Benjamini	FDR
UP_KEYWORDS	Ribosome biogenesis	8	1.92308	0.000318284	Q13601, O15381, Q14137, Q8IY81, Q8NI36, Q9NV31, Q9GZL7, O00566	414	65	20581	6.11847	0.0962754	0.00560814	0.42825
GOTERM_BP_DIRECT	GO:0000466~maturation of 5.8S rRNA from tricistronic rRNA transcript (SSU-rRNA, 5.8S rRNA, LSU-rRNA)	3	0.721154	0.00314562	Q14137, Q8IY81, Q9GZL7	392	4	16792	32.1276	0.996332	0.399397	5.20289
GOTERM_BP_DIRECT	GO:0000463~maturation of LSU-rRNA from tricistronic rRNA transcript (SSU-rRNA, 5.8S rRNA, LSU-rRNA)	3	0.721154	0.017471	Q14137, Q8IY81, Q9GZL7	392	9	16792	14.2789	1	0.687132	25.8376
GOTERM_CC_DIRECT	GO:0030687~preribosome, large subunit precursor	4	0.961538	0.0246548	Q13685, Q14137, Q8IY81, Q9GZL7	398	29	18224	6.31572	0.999967	0.327357	29.5183
Annotation Cluster 9	RNA transport
Category	Term	Count	%	PValue	Genes	List Total	Pop Hits	Pop Total	Fold Enrichment	Bonferroni	Benjamini	FDR
KEGG_PATHWAY	hsa03013:RNA transport	17	4.08654	3.84833e-05	O14744, O14602, Q13310, P78406, Q8NFH3, P55010, P57678, Q9H074, Q14232, P20042, Q5SRE5, Q9UBU9, Q9UKX7, P49790, P49770, O00303, Q96Q11	203	172	6910	3.36436	0.00827811	0.00827811	0.0488313
UP_KEYWORDS	Protein biosynthesis	13	3.125	5.90605e-05	O14602, P49589, Q9NX07, Q9NP81, P55010, Q6PI48, P20042, Q14232, Q969S9, Q9BTE6, P49770, O00303, P15170	414	152	20581	4.25173	0.0186065	0.00125134	0.0795943
UP_KEYWORDS	Initiation factor	6	1.44231	0.00608597	O14602, P49770, P55010, O00303, Q14232, P20042	414	58	20581	5.14268	0.856476	0.0647484	7.90043
GOTERM_MF_DIRECT	GO:0003743~translation initiation factor activity	6	1.44231	0.0143542	O14602, P49770, P55010, O00303, Q14232, P20042	399	61	16881	4.16147	0.999775	0.475951	19.1517
GOTERM_BP_DIRECT	GO:0006446~regulation of translational initiation	4	0.961538	0.0507971	P49770, P55010, O00303, Q14232	392	36	16792	4.75964	1	0.809304	58.6926
BIOCARTA	h_vegfPathway:VEGF, Hypoxia, and Angiogenesis	4	0.961538	0.0706224	Q05397, P49770, Q14232, P20042	52	31	1625	4.03226	0.999982	0.973684	58.2553
GOTERM_BP_DIRECT	GO:0006413~translational initiation	7	1.68269	0.101002	O14602, P49770, P55010, O00303, Q9H074, Q14232, P20042	392	137	16792	2.18874	1	0.911946	83.5645
Annotation Cluster 10	Biosynthesis
Category	Term	Count	%	PValue	Genes	List Total	Pop Hits	Pop Total	Fold Enrichment	Bonferroni	Benjamini	FDR
KEGG_PATHWAY	hsa01130:Biosynthesis of antibiotics	15	3.60577	0.00356553	Q53H96, Q01813, Q96C36, P10515, P35558, P11182, O43837, P30837, O75874, P08237, P12694, Q9BWD1, Q01432, Q92947, P21399	203	212	6910	2.40845	0.537695	0.175421	4.43217
GOTERM_BP_DIRECT	GO:0006099~tricarboxylic acid cycle	5	1.20192	0.00433721	O75874, P10515, O43837, Q96HY7, P21399	392	29	16792	7.38564	0.999564	0.475207	7.10642
KEGG_PATHWAY	hsa00020:Citrate cycle (TCA cycle)	5	1.20192	0.010708	O75874, P10515, P35558, O43837, P21399	203	30	6910	5.67323	0.902255	0.282656	12.7713
UP_KEYWORDS	Tricarboxylic acid cycle	4	0.961538	0.0118748	O75874, P10515, O43837, P21399	414	24	20581	8.28543	0.977602	0.102854	14.8752
KEGG_PATHWAY	hsa01230:Biosynthesis of amino acids	7	1.68269	0.0206625	Q53H96, Q01813, O75874, P08237, Q96C36, O43837, P21399	203	74	6910	3.21994	0.989	0.363	23.2787
KEGG_PATHWAY	hsa01200:Carbon metabolism	8	1.92308	0.0471012	Q01813, Q3LXA3, O75874, P08237, Q9BWD1, P10515, O43837, P21399	203	113	6910	2.40987	0.99997	0.580394	45.7917
KEGG_PATHWAY	hsa01210:2-Oxocarboxylic acid metabolism	3	0.721154	0.0867719	O75874, O43837, P21399	203	17	6910	6.00695	1	0.684409	68.4005
Annotation Cluster 11	GTPase activity
Category	Term	Count	%	PValue	Genes	List Total	Pop Hits	Pop Total	Fold Enrichment	Bonferroni	Benjamini	FDR
UP_SEQ_FEATURE	nucleotide phosphate-binding region:GTP	15	3.60577	0.00479905	Q9BVP2, P50570, P35558, P55010, P61106, P11233, Q969S9, Q96BM9, Q15907, P08240, O00178, Q9Y6B6, P55039, Q7L523, P15170	410	310	20063	2.36778	0.997542	0.451652	7.51825
UP_KEYWORDS	GTP-binding	15	3.60577	0.00968852	Q9BVP2, P50570, P35558, P55010, P61106, P11233, Q969S9, Q96BM9, Q15907, P08240, O00178, Q9Y6B6, P55039, Q7L523, P15170	414	343	20581	2.17402	0.954769	0.0895509	12.3006
GOTERM_MF_DIRECT	GO:0003924~GTPase activity	13	3.125	0.00981549	Q9BVP2, P50570, P55010, P11233, P61106, Q969S9, Q96BM9, Q15907, P08240, O00178, Q9Y6B6, Q7L523, P15170	399	234	16881	2.35046	0.996756	0.436223	13.5014
INTERPRO	IPR027417:P-loop containing nucleoside triphosphate hydrolase	30	7.21154	0.0169738	Q9H2U1, P17812, P43686, Q96T60, Q12873, Q9BVP2, Q9UDY2, Q6UB35, P61106, P42285, O15381, P11233, P51398, Q969S9, Q15907, P08240, Q9Y6B6, P15170, P55039, Q13057, P50570, P15313, Q9NRZ9, Q96BM9, Q9BXL7, Q63HN8, Q9BQ39, B0I1T2, O00178, Q7L523	404	879	18559	1.56785	1	0.725031	23.4358
GOTERM_MF_DIRECT	GO:0005525~GTP binding	16	3.84615	0.0387882	Q9BVP2, P50570, P35558, P55010, P61106, P11233, Q969S9, Q96BM9, P49770, Q15907, P08240, O00178, Q9Y6B6, P55039, Q7L523, P15170	399	384	16881	1.76284	1	0.701719	44.1055
INTERPRO	IPR005225:Small GTP-binding protein domain	7	1.68269	0.156533	P61106, P11233, Q969S9, Q96BM9, Q15907, P55039, Q9Y6B6	404	167	18559	1.92555	1	0.987744	92.973
Annotation Cluster 12	Transport
Category	Term	Count	%	PValue	Genes	List Total	Pop Hits	Pop Total	Fold Enrichment	Bonferroni	Benjamini	FDR
GOTERM_BP_DIRECT	GO:0075733~intracellular transport of virus	7	1.68269	0.00114006	Q5SRE5, Q9UKX7, P49790, P52292, P78406, Q8NFH3, Q9UK41	392	51	16792	5.87955	0.868727	0.201969	1.91597
GOTERM_BP_DIRECT	GO:0006606~protein import into nucleus	7	1.68269	0.00223589	Q5SRE5, P55060, Q9UKX7, P49790, P52292, P78406, Q96P70	392	58	16792	5.16995	0.981395	0.328629	3.72499
GOTERM_CC_DIRECT	GO:0005643~nuclear pore	7	1.68269	0.00479602	Q9UBU9, Q9UKX7, P49790, P52292, Q8TEX9, P78406, P57088	398	72	18224	4.4517	0.862691	0.0992261	6.5149
GOTERM_BP_DIRECT	GO:0006409~tRNA export from nucleus	5	1.20192	0.00621713	Q5SRE5, Q9UKX7, P49790, P78406, Q8NFH3	392	32	16792	6.69324	0.999985	0.522919	10.0366
GOTERM_BP_DIRECT	GO:0010827~regulation of glucose transport	5	1.20192	0.00694705	Q5SRE5, Q9UKX7, P49790, P78406, Q8NFH3	392	33	16792	6.49041	0.999996	0.539552	11.1506
GOTERM_BP_DIRECT	GO:0007077~mitotic nuclear envelope disassembly	5	1.20192	0.0188841	Q5SRE5, Q9UKX7, P49790, P78406, Q8NFH3	392	44	16792	4.86781	1	0.689688	27.6259
UP_KEYWORDS	mRNA transport	7	1.68269	0.0200447	Q5SRE5, Q9UBU9, Q96ST2, Q9UKX7, P49790, Q8NFH3, Q9UN86	414	106	20581	3.2829	0.998402	0.148686	23.8893
GOTERM_BP_DIRECT	GO:0006406~mRNA export from nucleus	7	1.68269	0.029367	Q5SRE5, Q9UBU9, Q10570, Q9UKX7, P49790, P78406, Q8NFH3	392	100	16792	2.99857	1	0.743446	39.6796
GOTERM_BP_DIRECT	GO:1900034~regulation of cellular response to heat	6	1.44231	0.030539	Q5SRE5, Q9UKX7, Q9UQM7, P49790, P78406, Q8NFH3	392	75	16792	3.42694	1	0.748464	40.903
GOTERM_BP_DIRECT	GO:0031047~gene silencing by RNA	7	1.68269	0.0452866	P30876, Q5SRE5, Q9UKX7, Q9UIV1, P49790, P78406, Q8NFH3	392	111	16792	2.70142	1	0.789119	54.4318
GOTERM_BP_DIRECT	GO:0016925~protein sumoylation	7	1.68269	0.0558645	Q5SRE5, Q9UKX7, P49790, P78406, Q13426, Q8NFH3, Q8N3U4	392	117	16792	2.56288	1	0.8339	62.2774
UP_KEYWORDS	Nuclear pore complex	4	0.961538	0.078813	Q5SRE5, Q9UKX7, P49790, Q8NFH3	414	50	20581	3.977	1	0.372597	66.9366
UP_KEYWORDS	Translocation	5	1.20192	0.0886693	Q5SRE5, O43615, Q9UKX7, P49790, Q8NFH3	414	84	20581	2.95908	1	0.398946	71.4002
GOTERM_BP_DIRECT	GO:0019083~viral transcription	5	1.20192	0.264389	Q5SRE5, Q9UKX7, P49790, P78406, Q8NFH3	392	112	16792	1.91235	1	0.990641	99.4524
Annotation Cluster 13	G-path
Category	Term	Count	%	PValue	Genes	List Total	Pop Hits	Pop Total	Fold Enrichment	Bonferroni	Benjamini	FDR
UP_SEQ_FEATURE	domain:G-patch	4	0.961538	0.0110027	Q8IX01, Q92917, Q96I25, Q8IWX8	410	23	20063	8.51029	0.999999	0.627322	16.4524
SMART	SM00443:G_patch	4	0.961538	0.0246688	Q8IX01, Q92917, Q96I25, Q8IWX8	206	31	10057	6.2994	0.987044	0.765132	26.3558
INTERPRO	IPR000467:G-patch domain	4	0.961538	0.0316548	Q8IX01, Q92917, Q96I25, Q8IWX8	404	32	18559	5.74226	1	0.783929	39.4533
Annotation Cluster 14	Vesicle transport
Category	Term	Count	%	PValue	Genes	List Total	Pop Hits	Pop Total	Fold Enrichment	Bonferroni	Benjamini	FDR
GOTERM_BP_DIRECT	GO:0048208~COPII vesicle coating	6	1.44231	0.0136643	Q15436, Q92734, O43617, O15155, Q9Y6Y8, Q9Y6B6	392	61	16792	4.21345	1	0.639558	20.8111
GOTERM_BP_DIRECT	GO:0006888~ER to Golgi vesicle-mediated transport	9	2.16346	0.0338967	Q15437, Q15436, Q12907, O43617, O15155, Q9Y6Y8, Q96JB2, Q9Y6B6, O43264	392	160	16792	2.40957	1	0.744378	44.2799
UP_KEYWORDS	ER-Golgi transport	6	1.44231	0.0408864	Q15437, Q15436, O43617, O15155, Q9Y6B6, O43264	414	94	20581	3.17314	0.999998	0.241616	43.039
Annotation Cluster 15	Importin
Category	Term	Count	%	PValue	Genes	List Total	Pop Hits	Pop Total	Fold Enrichment	Bonferroni	Benjamini	FDR
UP_SEQ_FEATURE	domain:Importin N-terminal	3	0.721154	0.0320886	P55060, Q8TEX9, Q96P70	410	14	20063	10.4859	1	0.882814	41.1335
GOTERM_MF_DIRECT	GO:0008536~Ran GTPase binding	4	0.961538	0.0329882	P55060, Q9UKX7, Q8TEX9, Q96P70	399	30	16881	5.6411	1	0.682232	38.9359
SMART	SM00913:SM00913	3	0.721154	0.0411313	P55060, Q8TEX9, Q96P70	206	16	10057	9.15382	0.99933	0.768144	40.2151
INTERPRO	IPR001494:Importin-beta, N-terminal	3	0.721154	0.0516014	P55060, Q8TEX9, Q96P70	404	17	18559	8.10673	1	0.864367	56.2388
Annotation Cluster 16	Dehydrogenase
Category	Term	Count	%	PValue	Genes	List Total	Pop Hits	Pop Total	Fold Enrichment	Bonferroni	Benjamini	FDR
UP_KEYWORDS	FAD	9	2.16346	0.0016959	Q8NFF5, O00116, Q3LXA3, Q96HE7, P26440, P43304, Q92947, Q96CU9, Q6JQN1	414	110	20581	4.06739	0.417108	0.0242357	2.26232
UP_KEYWORDS	Flavoprotein	9	2.16346	0.00324111	Q8NFF5, O00116, Q3LXA3, Q96HE7, P26440, P43304, Q92947, Q96CU9, Q6JQN1	414	122	20581	3.66732	0.64383	0.0389277	4.28228
UP_SEQ_FEATURE	binding site:FAD	4	0.961538	0.0110027	Q96HE7, P26440, Q92947, Q6JQN1	410	23	20063	8.51029	0.999999	0.627322	16.4524
INTERPRO	IPR013786:Acyl-CoA dehydrogenase/oxidase, N-terminal	3	0.721154	0.0313219	P26440, Q92947, Q6JQN1	404	13	18559	10.6011	1	0.7981	39.1278
INTERPRO	IPR006091:Acyl-CoA oxidase/dehydrogenase, central domain	3	0.721154	0.040983	P26440, Q92947, Q6JQN1	404	15	18559	9.18762	1	0.835259	47.9387
INTERPRO	IPR009075:Acyl-CoA dehydrogenase/oxidase C-terminal	3	0.721154	0.040983	P26440, Q92947, Q6JQN1	404	15	18559	9.18762	1	0.835259	47.9387
INTERPRO	IPR009100:Acyl-CoA dehydrogenase/oxidase	3	0.721154	0.040983	P26440, Q92947, Q6JQN1	404	15	18559	9.18762	1	0.835259	47.9387
GOTERM_MF_DIRECT	GO:0052890~oxidoreductase activity, acting on the CH-CH group of donors, with a flavin as acceptor	3	0.721154	0.0475497	P26440, Q92947, Q6JQN1	399	15	16881	8.46165	1	0.723786	51.1467
GOTERM_MF_DIRECT	GO:0003995~acyl-CoA dehydrogenase activity	3	0.721154	0.0535144	P26440, Q92947, Q6JQN1	399	16	16881	7.9328	1	0.750759	55.4574
GOTERM_BP_DIRECT	GO:0033539~fatty acid beta-oxidation using acyl-CoA dehydrogenase	3	0.721154	0.064741	P26440, Q92947, Q6JQN1	392	18	16792	7.13946	1	0.853626	67.8613
GOTERM_MF_DIRECT	GO:0016627~oxidoreductase activity, acting on the CH-CH group of donors	3	0.721154	0.0661737	P26440, Q92947, Q6JQN1	399	18	16881	7.05138	1	0.796303	63.4585
UP_SEQ_FEATURE	nucleotide phosphate-binding region:FAD	4	0.961538	0.132666	P26440, P43304, Q92947, Q6JQN1	410	62	20063	3.15704	1	0.993775	90.0985
GOTERM_MF_DIRECT	GO:0000062~fatty-acyl-CoA binding	3	0.721154	0.157001	P26440, Q92947, Q6JQN1	399	30	16881	4.23083	1	0.911097	91.8839
GOTERM_MF_DIRECT	GO:0009055~electron carrier activity	5	1.20192	0.163036	P26440, Q92947, O43837, P14598, Q6JQN1	399	90	16881	2.35046	1	0.914733	92.6976
GOTERM_MF_DIRECT	GO:0050660~flavin adenine dinucleotide binding	4	0.961538	0.191647	O00116, P26440, Q92947, Q6JQN1	399	64	16881	2.64427	1	0.943566	95.6213
GOTERM_BP_DIRECT	GO:0055088~lipid homeostasis	3	0.721154	0.23002	P26440, Q92947, Q6JQN1	392	39	16792	3.29513	1	0.985998	98.8121
Annotation Cluster 17	Proteasome
Category	Term	Count	%	PValue	Genes	List Total	Pop Hits	Pop Total	Fold Enrichment	Bonferroni	Benjamini	FDR
GOTERM_BP_DIRECT	GO:0002479~antigen processing and presentation of exogenous peptide antigen via MHC class I, TAP-dependent	8	1.92308	0.000633557	P43686, P03989, P30447, P30481, P30464, P55036, P51665, P14598, P30461, Q92530, Q16401	392	63	16792	5.43959	0.676349	0.14884	1.06905
GOTERM_BP_DIRECT	GO:0050852~T cell receptor signaling pathway	10	2.40385	0.00788231	P43686, P20039, Q9BXL7, Q9BZL6, P06241, P55036, Q08499, P51665, Q92530, Q16401	392	148	16792	2.89437	0.999999	0.563337	12.5591
GOTERM_CC_DIRECT	GO:0000502~proteasome complex	6	1.44231	0.00979864	P43686, Q04323, P55036, P51665, Q92530, Q16401	398	60	18224	4.57889	0.982868	0.155871	12.8888
GOTERM_CC_DIRECT	GO:0008540~proteasome regulatory particle, base subcomplex	3	0.721154	0.0270436	P43686, P55036, Q16401	398	12	18224	11.4472	0.999988	0.342535	31.8991
GOTERM_BP_DIRECT	GO:0000209~protein polyubiquitination	10	2.40385	0.0286459	P43686, Q5VTR2, O95071, P55036, P51665, Q63HN8, Q7Z6Z7, Q92530, Q16401, P10415	392	184	16792	2.32808	1	0.752965	38.9151
GOTERM_BP_DIRECT	GO:0006521~regulation of cellular amino acid metabolic process	5	1.20192	0.0306556	P43686, P55036, P51665, Q92530, Q16401	392	51	16792	4.19968	1	0.732743	41.0235
GOTERM_BP_DIRECT	GO:0043488~regulation of mRNA stability	7	1.68269	0.0332741	P43686, Q5RKV6, Q9Y5A9, P55036, P51665, Q92530, Q16401	392	103	16792	2.91123	1	0.745638	43.6679
GOTERM_BP_DIRECT	GO:0002223~stimulatory C-type lectin receptor signaling pathway	7	1.68269	0.0360575	P43686, Q9BXL7, P06241, P55036, P51665, Q92530, Q16401	392	105	16792	2.85578	1	0.74381	46.3562
GOTERM_CC_DIRECT	GO:0022624~proteasome accessory complex	3	0.721154	0.0518974	P43686, P55036, Q16401	398	17	18224	8.0804	1	0.476568	52.6113
GOTERM_BP_DIRECT	GO:0038095~Fc-epsilon receptor signaling pathway	9	2.16346	0.0570112	Q13469, P43686, O95644, Q9BXL7, P01764, P55036, P51665, Q92530, Q16401	392	178	16792	2.1659	1	0.834951	63.0469
GOTERM_BP_DIRECT	GO:0060071~Wnt signaling pathway, planar cell polarity pathway	6	1.44231	0.0636129	P43686, P55036, P51665, P63010, Q92530, Q16401	392	92	16792	2.7937	1	0.853087	67.1975
GOTERM_BP_DIRECT	GO:0038061~NIK/NF-kappaB signaling	5	1.20192	0.0677184	P43686, P55036, P51665, Q92530, Q16401	392	66	16792	3.24521	1	0.862094	69.5531
GOTERM_BP_DIRECT	GO:0051436~negative regulation of ubiquitin-protein ligase activity involved in mitotic cell cycle	5	1.20192	0.0836035	P43686, P55036, P51665, Q92530, Q16401	392	71	16792	3.01667	1	0.894837	77.2509
UP_KEYWORDS	Proteasome	4	0.961538	0.0902455	P43686, P55036, P51665, Q92530	414	53	20581	3.75189	1	0.399368	72.0599
GOTERM_BP_DIRECT	GO:0051437~positive regulation of ubiquitin-protein ligase activity involved in regulation of mitotic cell cycle transition	5	1.20192	0.101139	P43686, P55036, P51665, Q92530, Q16401	392	76	16792	2.81821	1	0.909506	83.6068
GOTERM_BP_DIRECT	GO:0043161~proteasome-mediated ubiquitin-dependent protein catabolic process	9	2.16346	0.102706	P43686, Q04323, Q9BZK7, P55036, P51665, Q13619, Q9Y263, Q92530, Q16401	392	203	16792	1.89917	1	0.910298	84.0848
GOTERM_BP_DIRECT	GO:0031145~anaphase-promoting complex-dependent catabolic process	5	1.20192	0.112408	P43686, P55036, P51665, Q92530, Q16401	392	79	16792	2.71119	1	0.922483	86.7645
KEGG_PATHWAY	hsa03050:Proteasome	4	0.961538	0.136729	P43686, P55036, P51665, Q92530	203	44	6910	3.09449	1	0.748614	84.5263
GOTERM_BP_DIRECT	GO:0033209~tumor necrosis factor-mediated signaling pathway	6	1.44231	0.14131	P43686, Q15628, P55036, P51665, Q92530, Q16401	392	118	16792	2.17814	1	0.945845	92.4505
GOTERM_BP_DIRECT	GO:0090263~positive regulation of canonical Wnt signaling pathway	6	1.44231	0.148508	P43686, O95071, P55036, P51665, Q92530, Q16401	392	120	16792	2.14184	1	0.950818	93.4549
GOTERM_BP_DIRECT	GO:0090090~negative regulation of canonical Wnt signaling pathway	7	1.68269	0.18077	P43686, Q08117, P55036, P51665, Q13188, Q92530, Q16401	392	163	16792	1.83961	1	0.970223	96.6004
GOTERM_BP_DIRECT	GO:0000165~MAPK cascade	9	2.16346	0.267579	P43686, Q05397, Q9UQM7, P06241, P55036, P51665, Q02750, Q92530, Q16401	392	262	16792	1.47149	1	0.990138	99.4913
Annotation Cluster 18	BAR domain
Category	Term	Count	%	PValue	Genes	List Total	Pop Hits	Pop Total	Fold Enrichment	Bonferroni	Benjamini	FDR
SMART	SM00721:BAR	3	0.721154	0.0364701	Q9Y3L3, Q9Y371, O00499	206	15	10057	9.76408	0.998442	0.801328	36.5568
UP_SEQ_FEATURE	domain:BAR	3	0.721154	0.0460789	Q9Y3L3, Q9Y371, O00499	410	17	20063	8.63544	1	0.914139	53.534
INTERPRO	IPR004148:BAR domain	3	0.721154	0.0461789	Q9Y3L3, Q9Y371, O00499	404	16	18559	8.6134	1	0.844379	52.1687
INTERPRO	IPR027267:Arfaptin homology (AH) domain/BAR domain	3	0.721154	0.130286	Q9Y3L3, Q9Y371, O00499	404	29	18559	4.75222	1	0.978251	88.6668
Annotation Cluster 19	Clathrin
Category	Term	Count	%	PValue	Genes	List Total	Pop Hits	Pop Total	Fold Enrichment	Bonferroni	Benjamini	FDR
UP_KEYWORDS	Coated pit	5	1.20192	0.0190285	Q13492, P50570, O60641, Q9UBC2, P63010	414	51	20581	4.87378	0.997778	0.144997	22.8184
GOTERM_BP_DIRECT	GO:0048268~clathrin coat assembly	3	0.721154	0.0356056	Q13492, O60641, P63010	392	13	16792	9.8854	1	0.74667	45.9281
GOTERM_MF_DIRECT	GO:0030276~clathrin binding	3	0.721154	0.347822	Q13492, O60641, P63010	399	52	16881	2.44086	1	0.98906	99.8136
Annotation Cluster 20	Cell cycle metabolism
Category	Term	Count	%	PValue	Genes	List Total	Pop Hits	Pop Total	Fold Enrichment	Bonferroni	Benjamini	FDR
GOTERM_BP_DIRECT	GO:0000082~G1/S transition of mitotic cell cycle	8	1.92308	0.00979748	P49642, Q9UQM7, P04818, P09884, Q13619, P15170, P31350, P00374	392	102	16792	3.35974	1	0.533258	15.3781
GOTERM_BP_DIRECT	GO:0000083~regulation of transcription involved in G1/S transition of mitotic cell cycle	4	0.961538	0.0157034	P04818, P09884, P31350, P00374	392	23	16792	7.44987	1	0.661628	23.5421
KEGG_PATHWAY	hsa00240:Pyrimidine metabolism	6	1.44231	0.187796	P30876, P17812, P49642, P04818, P09884, P31350	203	104	6910	1.96381	1	0.787596	92.8634
UP_KEYWORDS	DNA replication	3	0.721154	0.565489	P49642, P09884, P31350	414	94	20581	1.58657	1	0.900231	99.9987
Annotation Cluster 21	NAD
Category	Term	Count	%	PValue	Genes	List Total	Pop Hits	Pop Total	Fold Enrichment	Bonferroni	Benjamini	FDR
GOTERM_MF_DIRECT	GO:0051287~NAD binding	5	1.20192	0.0119374	Q13363, O75874, Q9BUT1, O43837, Q49A26	399	38	16881	5.56688	0.999067	0.440911	16.1873
UP_KEYWORDS	NAD	8	1.92308	0.0634171	Q13363, Q8NCW5, Q9BUT1, O43837, Q460N5, Q49A26, P30837, Q8IW45	414	175	20581	2.27257	1	0.325041	58.6577
UP_SEQ_FEATURE	nucleotide phosphate-binding region:NAD	4	0.961538	0.223437	Q13363, Q9BUT1, Q49A26, P30837	410	80	20063	2.44671	1	0.997418	98.3568
UP_SEQ_FEATURE	binding site:NAD	3	0.721154	0.301686	Q13363, Q9BUT1, Q49A26	410	54	20063	2.71856	1	0.999278	99.7074
Annotation Cluster 22	UBA
Category	Term	Count	%	PValue	Genes	List Total	Pop Hits	Pop Total	Fold Enrichment	Bonferroni	Benjamini	FDR
INTERPRO	IPR009060:UBA-like	6	1.44231	0.00902509	O94888, Q96GG9, Q9UBU9, Q04323, Q7Z6Z7, Q14157	404	59	18559	4.67167	0.999727	0.598137	13.1874
SMART	SM00165:UBA	3	0.721154	0.117382	Q04323, Q7Z6Z7, Q14157	206	29	10057	5.05039	1	0.88612	78.3308
UP_SEQ_FEATURE	domain:UBA	3	0.721154	0.195986	Q04323, Q7Z6Z7, Q14157	410	40	20063	3.67006	1	0.997323	97.1106
INTERPRO	IPR015940:Ubiquitin-associated/translation elongation factor EF1B, N-terminal, eukaryote	3	0.721154	0.247628	Q04323, Q7Z6Z7, Q14157	404	44	18559	3.13214	1	0.998127	98.8183
Annotation Cluster 23	Endocytosis
Category	Term	Count	%	PValue	Genes	List Total	Pop Hits	Pop Total	Fold Enrichment	Bonferroni	Benjamini	FDR
UP_KEYWORDS	Coated pit	5	1.20192	0.0190285	Q13492, P50570, O60641, Q9UBC2, P63010	414	51	20581	4.87378	0.997778	0.144997	22.8184
UP_KEYWORDS	Endocytosis	6	1.44231	0.0967867	Q13492, P50570, Q14C86, Q9UBC2, P63010, O00499	414	121	20581	2.46509	1	0.396978	74.65
GOTERM_BP_DIRECT	GO:0006897~endocytosis	7	1.68269	0.106336	Q13492, P50570, Q9Y5X2, Q14C86, O60641, Q9UBC2, O00499	392	139	16792	2.15725	1	0.915464	85.1421
GOTERM_CC_DIRECT	GO:0005905~clathrin-coated pit	3	0.721154	0.33758	Q13492, P50570, O60641	398	55	18224	2.49758	1	0.899601	99.6884
Annotation Cluster 24	Transport
Category	Term	Count	%	PValue	Genes	List Total	Pop Hits	Pop Total	Fold Enrichment	Bonferroni	Benjamini	FDR
GOTERM_BP_DIRECT	GO:0048490~anterograde synaptic vesicle transport	3	0.721154	0.0464941	O00203, O95295, O14617	392	15	16792	8.56735	1	0.791821	55.3994
GOTERM_BP_DIRECT	GO:0032438~melanosome organization	3	0.721154	0.0780122	O00203, O95295, O14617	392	20	16792	6.42551	1	0.888147	74.7788
GOTERM_BP_DIRECT	GO:0008089~anterograde axonal transport	3	0.721154	0.122008	O00203, O95295, O14617	392	26	16792	4.9427	1	0.930204	88.9936
GOTERM_CC_DIRECT	GO:1904115~axon cytoplasm	3	0.721154	0.176736	O00203, O95295, O14617	398	35	18224	3.92477	1	0.786605	93.4468
Annotation Cluster 25	Lipid transport
Category	Term	Count	%	PValue	Genes	List Total	Pop Hits	Pop Total	Fold Enrichment	Bonferroni	Benjamini	FDR
INTERPRO	IPR018494:Oxysterol-binding protein, conserved site	3	0.721154	0.0268834	Q9BZF1, Q96SU4, Q9BXB5	404	12	18559	11.4845	1	0.765602	34.6285
INTERPRO	IPR000648:Oxysterol-binding protein	3	0.721154	0.0268834	Q9BZF1, Q96SU4, Q9BXB5	404	12	18559	11.4845	1	0.765602	34.6285
GOTERM_MF_DIRECT	GO:0015485~cholesterol binding	3	0.721154	0.251783	Q9BZF1, P30536, Q9BXB5	399	41	16881	3.09573	1	0.972282	98.595
GOTERM_BP_DIRECT	GO:0006869~lipid transport	4	0.961538	0.260369	Q9BZF1, Q96SU4, P30536, Q9BXB5	392	76	16792	2.25456	1	0.990612	99.3994
UP_KEYWORDS	Lipid transport	4	0.961538	0.303149	Q9BZF1, Q96SU4, P30536, Q9BXB5	414	96	20581	2.07136	1	0.716957	99.2322
Annotation Cluster 26	Cell cycle
Category	Term	Count	%	PValue	Genes	List Total	Pop Hits	Pop Total	Fold Enrichment	Bonferroni	Benjamini	FDR
GOTERM_BP_DIRECT	GO:0007062~sister chromatid cohesion	7	1.68269	0.0332741	Q7Z460, Q9NTI5, P49959, Q8NFH3, Q9NSP4, Q8N3U4, O43264	392	103	16792	2.91123	1	0.745638	43.6679
UP_KEYWORDS	Cell division	14	3.36538	0.0505306	Q9NTI5, Q9NXR7, Q9HD42, Q8NFH3, Q96CT7, Q8N3U4, O43264, Q6P1J9, Q7Z460, P11233, Q9NRZ9, Q96BM9, Q53GS9, P53990	414	388	20581	1.79375	1	0.271738	50.2944
UP_KEYWORDS	Cell cycle	20	4.80769	0.0659993	Q9NXR7, Q9NTI5, Q9NVI1, Q9HD42, Q8NFH3, Q8TAE8, Q96CT7, Q8N3U4, O43264, Q6P1J9, Q15418, Q7Z460, P11233, Q96BM9, Q9NRZ9, Q56NI9, Q9P287, Q5UIP0, Q53GS9, P53990	414	650	20581	1.52962	1	0.331074	60.1682
GOTERM_BP_DIRECT	GO:0051301~cell division	13	3.125	0.117947	Q9NTI5, Q9NXR7, Q9HD42, Q8NFH3, Q96CT7, Q8N3U4, O43264, Q6P1J9, Q7Z460, Q9NRZ9, Q96BM9, Q53GS9, P53990	392	350	16792	1.59108	1	0.92779	88.0976
GOTERM_CC_DIRECT	GO:0000775~chromosome, centromeric region	4	0.961538	0.127528	Q9NTI5, Q9NRZ9, Q8N3U4, O43264	398	57	18224	3.21326	1	0.71409	85.2174
UP_KEYWORDS	Chromosome partition	3	0.721154	0.228199	Q96BM9, Q8NFH3, Q8N3U4	414	45	20581	3.31417	1	0.638295	96.9564
UP_KEYWORDS	Mitosis	8	1.92308	0.273459	Q7Z460, Q9NXR7, Q9NTI5, Q96BM9, Q9NRZ9, Q8NFH3, Q8N3U4, O43264	414	262	20581	1.51794	1	0.684757	98.6524
GOTERM_BP_DIRECT	GO:0007067~mitotic nuclear division	7	1.68269	0.520108	Q96JH7, Q9NXR7, Q96BM9, Q9NRZ9, Q8NFH3, Q8N3U4, O43264	392	248	16792	1.2091	1	0.999716	99.9996
Annotation Cluster 27	PH domain
Category	Term	Count	%	PValue	Genes	List Total	Pop Hits	Pop Total	Fold Enrichment	Bonferroni	Benjamini	FDR
SMART	SM00233:PH	10	2.40385	0.090927	Q8NDX1, Q9HB19, Q9BZF1, Q9ULZ2, Q8TD55, Q96SU4, P50570, Q9BZL6, Q9H4E7, Q9BXB5	206	264	10057	1.84926	1	0.874246	68.8879
UP_SEQ_FEATURE	domain:PH	9	2.16346	0.129632	Q8NDX1, Q9BZF1, Q9ULZ2, Q8TD55, Q96SU4, P50570, Q9BZL6, Q9H4E7, Q9BXB5	410	245	20063	1.79758	1	0.993905	89.5205
INTERPRO	IPR001849:Pleckstrin homology domain	10	2.40385	0.138964	Q8NDX1, Q9HB19, Q9BZF1, Q9ULZ2, Q8TD55, Q96SU4, P50570, Q9BZL6, Q9H4E7, Q9BXB5	404	271	18559	1.69513	1	0.981361	90.3078
INTERPRO	IPR011993:Pleckstrin homology-like domain	12	2.88462	0.332412	Q8NDX1, Q9HB19, Q9BZF1, Q9ULZ2, Q05397, Q9UKX7, Q8TD55, Q96SU4, P50570, Q9BZL6, Q9H4E7, Q9BXB5	404	427	18559	1.291	1	0.999704	99.817
Annotation Cluster 28	Kinase
Category	Term	Count	%	PValue	Genes	List Total	Pop Hits	Pop Total	Fold Enrichment	Bonferroni	Benjamini	FDR
UP_KEYWORDS	Nucleotide-binding	63	15.1442	1.53762e-05	P17812, Q9UEW8, Q96T60, Q12873, Q3LXA3, O43615, Q9BVP2, Q9Y6E0, Q9NP81, Q13188, Q8NFF5, P61106, P11233, O00442, Q9UQM7, P55263, Q9Y6B6, Q96Q11, Q13057, P49589, P50570, P51003, P55010, Q6PI48, Q15418, Q96BM9, P08237, Q9BZL6, P42025, Q7L523, Q9H2U1, P43686, Q01813, Q15349, Q8NCW5, Q02750, Q9Y385, P33121, Q14166, Q6UB35, P13861, Q96RQ3, Q9GZZ9, O15381, P42285, Q969S9, P08243, Q8NFD2, P06241, Q15907,…	414	1788	20581	1.75162	0.00487772	0.0003492	0.0207277
UP_KEYWORDS	ATP-binding	46	11.0577	0.00104608	Q9H2U1, P17812, P43686, Q9UEW8, Q01813, Q96T60, O43615, Q12873, Q3LXA3, Q15349, Q9Y6E0, Q9NP81, Q02750, Q9Y385, Q6UB35, Q14166, P33121, Q13188, Q96RQ3, Q8NFF5, Q9GZZ9, O15381, P42285, O00442, P08243, Q8NFD2, Q9UQM7, P06241, P55263, Q96Q11, Q8IW45, Q13057, Q9UIG0, P49589, P12277, P51003, P34947, Q6PI48, Q15418, Q05397, P08237, Q9NRZ9, P42025, Q9BZL6, Q9BQ39, B0I1T2	414	1391	20581	1.64398	0.283106	0.0165037	1.40112
GOTERM_MF_DIRECT	GO:0005524~ATP binding	52	12.5	0.00470463	P17812, Q9UEW8, Q96T60, Q12873, Q3LXA3, O43615, Q9Y6E0, Q96EY1, Q9NP81, Q13188, Q8NFF5, O00442, Q9UQM7, P55263, Q96Q11, Q9NTI5, Q13057, P49589, P51003, P15313, Q6PI48, Q15418, P08237, Q9BZL6, P42025, Q13761, Q9H2U1, P43686, Q01813, Q15349, Q02750, Q9Y385, P33121, Q14166, Q6UB35, Q96RQ3, O15381, P42285, Q9GZZ9, P08243, Q8NFD2, P49770, P06241, Q8IW45, Q9UIG0, P12277, P34947, Q05397, Q9NRZ9, Q9BTE6,…	399	1495	16881	1.47159	0.935419	0.289993	6.69915
UP_SEQ_FEATURE	active site:Proton acceptor	22	5.28846	0.0351023	Q9UEW8, Q01813, Q15349, P26440, Q9Y6E0, Q02750, P34947, Q13188, P30837, Q15418, Q5JRX3, Q96LJ7, Q05397, P08237, Q8NFD2, Q9UQM7, Q9BUT1, Q9BWD1, Q9BZL6, P06241, Q92947, Q6YN16	410	672	20063	1.60201	1	0.86849	44.0417
UP_KEYWORDS	Kinase	22	5.28846	0.0675964	Q13057, Q9UEW8, Q01813, Q96T60, Q9UIG0, P12277, Q3LXA3, Q15349, Q9Y6E0, Q02750, P34947, P13861, Q13188, Q15418, Q05397, P08237, Q8NFD2, Q9UQM7, Q9BZL6, Q9Y2X7, P06241, P55263	414	735	20581	1.488	1	0.332801	61.0767
UP_SEQ_FEATURE	nucleotide phosphate-binding region:ATP	28	6.73077	0.0784677	Q9H2U1, P43686, Q9UEW8, Q01813, Q96T60, O43615, Q3LXA3, Q12873, Q15349, Q9Y6E0, Q9NP81, Q02750, Q6UB35, Q13188, P42285, O15381, Q8NFD2, Q9UQM7, P06241, Q13057, P12277, P34947, Q15418, Q05397, Q9NRZ9, P08237, Q9BZL6, Q9BQ39	410	994	20063	1.37843	1	0.977182	73.4908
UP_SEQ_FEATURE	binding site:ATP	17	4.08654	0.109132	Q9UEW8, P49589, P12277, Q3LXA3, Q15349, Q9Y6E0, Q02750, P34947, Q13188, Q96RQ3, Q15418, Q9GZZ9, Q05397, Q8NFD2, Q9UQM7, Q9BZL6, P06241	410	558	20063	1.49083	1	0.990495	84.703
GOTERM_MF_DIRECT	GO:0004702~receptor signaling protein serine/threonine kinase activity	4	0.961538	0.129134	Q9UEW8, Q9Y6E0, Q02750, Q13188	399	53	16881	3.19308	1	0.899263	86.9073
GOTERM_MF_DIRECT	GO:0004712~protein serine/threonine/tyrosine kinase activity	3	0.721154	0.148733	Q15418, Q15349, Q02750	399	29	16881	4.37672	1	0.903572	90.6314
KEGG_PATHWAY	hsa04722:Neurotrophin signaling pathway	6	1.44231	0.273771	Q15418, Q9UQM7, Q15349, Q02750, O00221, P10415	203	120	6910	1.70197	1	0.868959	98.2751
KEGG_PATHWAY	hsa04720:Long-term potentiation	4	0.961538	0.303777	Q15418, Q9UQM7, Q15349, Q02750	203	66	6910	2.06299	1	0.872312	98.9903
SMART	SM00220:S_TKc	10	2.40385	0.310282	Q15418, Q9UEW8, Q8NFD2, Q9UQM7, Q15349, Q9BZL6, Q9Y6E0, Q02750, P34947, Q13188	206	359	10057	1.3599	1	0.982398	98.943
INTERPRO	IPR017441:Protein kinase, ATP binding site	11	2.64423	0.316789	Q15418, Q9UEW8, Q05397, Q9UQM7, Q15349, Q9BZL6, Q9Y6E0, P06241, Q02750, P34947, Q13188	404	381	18559	1.3263	1	0.999605	99.7374
GOTERM_BP_DIRECT	GO:0018105~peptidyl-serine phosphorylation	5	1.20192	0.332406	Q9UEW8, Q9UQM7, Q15349, Q9BZL6, P10415	392	125	16792	1.71347	1	0.995335	99.8944
GOTERM_BP_DIRECT	GO:0046777~protein autophosphorylation	6	1.44231	0.372123	Q9UEW8, Q05397, Q9UQM7, Q9BZL6, Q9Y6E0, P34947	392	172	16792	1.4943	1	0.997308	99.9627
UP_KEYWORDS	Serine/threonine-protein kinase	10	2.40385	0.391749	Q15418, Q9UEW8, Q8NFD2, Q9UQM7, Q15349, Q9BZL6, Q9Y6E0, Q02750, P34947, Q13188	414	393	20581	1.26495	1	0.781329	99.8772
GOTERM_MF_DIRECT	GO:0004672~protein kinase activity	10	2.40385	0.476522	Q15418, Q9UEW8, Q05397, Q8NFD2, Q9UQM7, Q15349, Q9BZL6, Q9Y6E0, Q02750, Q13188	399	359	16881	1.1785	1	0.996928	99.9926
INTERPRO	IPR000719:Protein kinase, catalytic domain	12	2.88462	0.478865	Q15418, Q9UEW8, Q05397, Q8NFD2, Q9UQM7, Q15349, Q9BZL6, Q9Y6E0, P06241, Q02750, P34947, Q13188	404	487	18559	1.13195	1	0.999946	99.9962
INTERPRO	IPR011009:Protein kinase-like domain	13	3.125	0.4863	Q9UEW8, Q15349, Q9Y6E0, Q02750, P34947, Q13188, Q6JQN1, Q15418, Q05397, Q8NFD2, Q9UQM7, Q9BZL6, P06241	404	531	18559	1.12466	1	0.999949	99.9969
BIOCARTA	h_mapkPathway:MAPKinase Signaling Pathway	4	0.961538	0.521398	Q15418, Q15349, Q15628, Q02750	52	87	1625	1.43678	1	0.996907	99.9848
GOTERM_MF_DIRECT	GO:0004674~protein serine/threonine kinase activity	10	2.40385	0.529595	Q15418, Q9UEW8, Q8NFD2, Q9UQM7, Q15349, Q9BZL6, Q9Y6E0, Q02750, P34947, Q13188	399	376	16881	1.12522	1	0.998088	99.9985
KEGG_PATHWAY	hsa04114:Oocyte meiosis	4	0.961538	0.622901	Q15418, Q9UQM7, Q15349, Q02750	203	109	6910	1.24915	1	0.958899	99.9996
UP_SEQ_FEATURE	domain:Protein kinase	10	2.40385	0.642289	Q9UEW8, Q05397, Q8NFD2, Q9UQM7, Q9BZL6, Q9Y6E0, P06241, Q02750, P34947, Q13188	410	478	20063	1.02373	1	1	100
KEGG_PATHWAY	hsa04914:Progesterone-mediated oocyte maturation	3	0.721154	0.727969	Q15418, Q15349, Q02750	203	87	6910	1.17377	1	0.979869	100
GOTERM_BP_DIRECT	GO:0006468~protein phosphorylation	10	2.40385	0.738872	Q15418, Q9UEW8, Q13363, Q8NFD2, Q9UQM7, Q9BZL6, Q9Y6E0, P06241, Q13188, Q13761	392	456	16792	0.939402	1	0.999998	100
INTERPRO	IPR008271:Serine/threonine-protein kinase, active site	6	1.44231	0.810858	Q15418, Q8NFD2, Q9UQM7, Q15349, Q9BZL6, Q02750	404	312	18559	0.883425	1	1	100
GOTERM_BP_DIRECT	GO:0035556~intracellular signal transduction	8	1.92308	0.832399	Q15418, Q9UEW8, O95644, Q15349, Q9BZL6, P06241, P13861, Q13188	392	403	16792	0.850357	1	1	100
KEGG_PATHWAY	hsa04010:MAPK signaling pathway	6	1.44231	0.873116	Q15418, O95644, Q15349, Q02750, Q7LDG7, Q13188	203	255	6910	0.800927	1	0.994733	100
Annotation Cluster 29	Bromo domain
Category	Term	Count	%	PValue	Genes	List Total	Pop Hits	Pop Total	Fold Enrichment	Bonferroni	Benjamini	FDR
UP_KEYWORDS	Bromodomain	4	0.961538	0.0430589	Q15059, Q9UIG0, Q9HB58, Q13342	414	39	20581	5.09872	0.999999	0.24416	44.7541
SMART	SM00297:BROMO	4	0.961538	0.0536097	Q15059, Q9UIG0, Q9HB58, Q13342	206	42	10057	4.64956	0.999931	0.797681	49.0769
INTERPRO	IPR001487:Bromodomain	4	0.961538	0.0662884	Q15059, Q9UIG0, Q9HB58, Q13342	404	43	18559	4.27331	1	0.90813	65.6948
UP_SEQ_FEATURE	domain:Bromo	3	0.721154	0.117502	Q9UIG0, Q9HB58, Q13342	410	29	20063	5.06215	1	0.991182	86.878
INTERPRO	IPR019786:Zinc finger, PHD-type, conserved site	4	0.961538	0.178159	Q12873, Q9UIG0, Q9HB58, Q13342	404	67	18559	2.74257	1	0.992791	95.314
INTERPRO	IPR019787:Zinc finger, PHD-finger	4	0.961538	0.245841	Q12873, Q9UIG0, Q9HB58, Q13342	404	79	18559	2.32598	1	0.998311	98.7737
SMART	SM00249:PHD	4	0.961538	0.272397	Q12873, Q9UIG0, Q9HB58, Q13342	206	89	10057	2.19417	1	0.974998	97.9652
UP_SEQ_FEATURE	zinc finger region:PHD-type	3	0.721154	0.286558	Q9UIG0, Q9HB58, Q13342	410	52	20063	2.82312	1	0.999006	99.5855
INTERPRO	IPR001965:Zinc finger, PHD-type	4	0.961538	0.304814	Q12873, Q9UIG0, Q9HB58, Q13342	404	89	18559	2.06463	1	0.999525	99.6557
INTERPRO	IPR011011:Zinc finger, FYVE/PHD-type	4	0.961538	0.593939	Q12873, Q9UIG0, Q9HB58, Q13342	404	141	18559	1.30321	1	0.999993	99.9999
Annotation Cluster 30	Kinetochore
Category	Term	Count	%	PValue	Genes	List Total	Pop Hits	Pop Total	Fold Enrichment	Bonferroni	Benjamini	FDR
GOTERM_BP_DIRECT	GO:0007062~sister chromatid cohesion	7	1.68269	0.0332741	Q7Z460, Q9NTI5, P49959, Q8NFH3, Q9NSP4, Q8N3U4, O43264	392	103	16792	2.91123	1	0.745638	43.6679
UP_KEYWORDS	Chromosome	13	3.125	0.108901	Q9H2U1, Q7Z460, O15347, P49959, Q96KQ7, Q56NI9, Q5UIP0, Q9BYG3, Q8NFH3, Q9NSP4, O00566, Q8N3U4, O43264	414	400	20581	1.61566	1	0.421456	78.869
GOTERM_CC_DIRECT	GO:0000776~kinetochore	4	0.961538	0.259041	Q7Z460, Q96ST3, Q8NFH3, O43264	398	81	18224	2.26118	1	0.85117	98.5023
GOTERM_CC_DIRECT	GO:0000777~condensed chromosome kinetochore	4	0.961538	0.294589	Q7Z460, Q8NFH3, Q9NSP4, O43264	398	87	18224	2.10524	1	0.876163	99.248
UP_KEYWORDS	Centromere	5	1.20192	0.296002	Q7Z460, Q8NFH3, Q9NSP4, Q8N3U4, O43264	414	137	20581	1.81433	1	0.710653	99.1189
UP_KEYWORDS	Kinetochore	4	0.961538	0.319638	Q7Z460, Q8NFH3, Q9NSP4, O43264	414	99	20581	2.00859	1	0.732035	99.444
Annotation Cluster 31	Metabolism
Category	Term	Count	%	PValue	Genes	List Total	Pop Hits	Pop Total	Fold Enrichment	Bonferroni	Benjamini	FDR
KEGG_PATHWAY	hsa00071:Fatty acid degradation	4	0.961538	0.136729	Q9BWD1, Q92947, P33121, P30837	203	44	6910	3.09449	1	0.748614	84.5263
KEGG_PATHWAY	hsa00310:Lysine degradation	4	0.961538	0.193891	Q96KQ7, Q9BWD1, Q92947, P30837	203	52	6910	2.61842	1	0.788148	93.5142
KEGG_PATHWAY	hsa00380:Tryptophan metabolism	3	0.721154	0.327302	Q9BWD1, Q92947, P30837	203	40	6910	2.55296	1	0.882448	99.3473
Annotation Cluster 32	KH domain
Category	Term	Count	%	PValue	Genes	List Total	Pop Hits	Pop Total	Fold Enrichment	Bonferroni	Benjamini	FDR
SMART	SM00322:KH	3	0.721154	0.181085	Q13601, Q8IWZ3, Q96I24	206	38	10057	3.85424	1	0.944797	91.3429
INTERPRO	IPR004087:K Homology domain	3	0.721154	0.199487	Q13601, Q8IWZ3, Q96I24	404	38	18559	3.62669	1	0.99567	96.8906
INTERPRO	IPR004088:K Homology domain, type 1	3	0.721154	0.247628	Q13601, Q8IWZ3, Q96I24	404	44	18559	3.13214	1	0.998127	98.8183
Annotation Cluster 33	Ion transport
Category	Term	Count	%	PValue	Genes	List Total	Pop Hits	Pop Total	Fold Enrichment	Bonferroni	Benjamini	FDR
GOTERM_BP_DIRECT	GO:0033572~transferrin transport	5	1.20192	0.00857182	Q9Y5K8, P50570, Q15907, P36543, P15313	392	35	16792	6.11953	1	0.573145	13.584
KEGG_PATHWAY	hsa05110:Vibrio cholerae infection	5	1.20192	0.0684018	Q9Y5K8, Q96HE7, Q9UDY2, P36543, P15313	203	53	6910	3.21126	1	0.639511	59.313
GOTERM_BP_DIRECT	GO:0016241~regulation of macroautophagy	4	0.961538	0.0824381	Q9Y5K8, Q9Y371, P36543, P15313	392	44	16792	3.89425	1	0.894822	76.7552
KEGG_PATHWAY	hsa04721:Synaptic vesicle cycle	5	1.20192	0.111736	Q9Y5K8, P50570, P63010, P36543, P15313	203	63	6910	2.70154	1	0.721866	77.7717
GOTERM_BP_DIRECT	GO:0090383~phagosome acidification	3	0.721154	0.12983	Q9Y5K8, P36543, P15313	392	27	16792	4.75964	1	0.938044	90.5435
KEGG_PATHWAY	hsa04966:Collecting duct acid secretion	3	0.721154	0.18603	Q9Y5K8, P36543, P15313	203	27	6910	3.78216	1	0.795635	92.664
UP_KEYWORDS	Hydrogen ion transport	3	0.721154	0.258001	Q9Y5K8, P36543, P15313	414	49	20581	3.04363	1	0.681233	98.2101
KEGG_PATHWAY	hsa05120:Epithelial cell signaling in Helicobacter pylori infection	4	0.961538	0.311838	Q9Y5K8, Q9Y2X7, P36543, P15313	203	67	6910	2.0322	1	0.873801	99.129
GOTERM_BP_DIRECT	GO:0015992~proton transport	3	0.721154	0.316595	Q9Y5K8, P36543, P15313	392	49	16792	2.62266	1	0.994766	99.8429
KEGG_PATHWAY	hsa05323:Rheumatoid arthritis	4	0.961538	0.477683	Q9Y5K8, P20039, P36543, P15313	203	88	6910	1.54725	1	0.929132	99.9737
GOTERM_BP_DIRECT	GO:0008286~insulin receptor signaling pathway	3	0.721154	0.545365	Q9Y5K8, P36543, P15313	392	78	16792	1.64757	1	0.999797	99.9998
KEGG_PATHWAY	hsa00190:Oxidative phosphorylation	5	1.20192	0.548694	P17568, Q9Y5K8, P36543, O95182, P15313	203	133	6910	1.27968	1	0.948334	99.9959
GOTERM_BP_DIRECT	GO:0034220~ion transmembrane transport	4	0.961538	0.870415	Q5EBL8, Q9Y5K8, P36543, P15313	392	210	16792	0.815938	1	1	100
UP_KEYWORDS	Ion transport	6	1.44231	0.996562	Q9UBY0, Q9Y5K8, Q13586, P36543, P15313, Q8TCC7	414	642	20581	0.464603	1	0.999994	100
Annotation Cluster 34	Immunity/Complement activation
Category	Term	Count	%	PValue	Genes	List Total	Pop Hits	Pop Total	Fold Enrichment	Bonferroni	Benjamini	FDR
UP_KEYWORDS	Complement pathway	4	0.961538	0.0237957	P17927, P20023, P10909, P0C0L4	414	31	20581	6.41452	0.999528	0.159751	27.7245
GOTERM_BP_DIRECT	GO:0006958~complement activation, classical pathway	5	1.20192	0.199588	P17927, P20023, P10909, P01764, P0C0L4	392	99	16792	2.16347	1	0.97786	97.7077
UP_KEYWORDS	Immunity	14	3.36538	0.210275	P17812, P17927, O15347, P30447, P20039, P20023, P03989, P01764, P10909, Q9BZL6, P30481, P06241, P30464, B0I1T2, Q14258, P0C0L4, P30461	414	500	20581	1.39195	1	0.613359	95.8524
GOTERM_BP_DIRECT	GO:0045087~innate immune response	13	3.125	0.299431	P17927, O15347, Q3LXA3, P20023, P14598, Q8IWZ3, P03989, Q05397, P01764, P10909, P30481, P06241, P30464, Q14258, P0C0L4, P30461	392	430	16792	1.29506	1	0.993443	99.7607
UP_KEYWORDS	Innate immunity	6	1.44231	0.603547	P17927, O15347, P20023, P10909, P0C0L4, Q14258	414	261	20581	1.14282	1	0.917365	99.9996
KEGG_PATHWAY	hsa04610:Complement and coagulation cascades	3	0.721154	0.603995	P17927, P20023, P0C0L4	203	69	6910	1.47997	1	0.958247	99.9992
Annotation Cluster 35	NF-kappa signaling pathway
Category	Term	Count	%	PValue	Genes	List Total	Pop Hits	Pop Total	Fold Enrichment	Bonferroni	Benjamini	FDR
GOTERM_BP_DIRECT	GO:0051092~positive regulation of NF-kappaB transcription factor activity	7	1.68269	0.0907722	Q9UQM7, Q9BXL7, Q15628, Q9BZL6, P10909, Q8IYM9, Q14258	392	133	16792	2.25456	1	0.904875	80.0877
GOTERM_BP_DIRECT	GO:0043123~positive regulation of I-kappaB kinase/NF-kappaB signaling	6	1.44231	0.321386	Q92734, Q9BXL7, Q15628, P06241, Q8IYM9, Q14258	392	161	16792	1.5964	1	0.994846	99.8605
KEGG_PATHWAY	hsa04064:NF-kappa B signaling pathway	4	0.961538	0.470125	Q9BXL7, Q15628, Q14258, P10415	203	87	6910	1.56503	1	0.932112	99.9684
Annotation Cluster 36	Helicase
Category	Term	Count	%	PValue	Genes	List Total	Pop Hits	Pop Total	Fold Enrichment	Bonferroni	Benjamini	FDR
SMART	SM00490:HELICc	5	1.20192	0.174391	Q9H2U1, P42285, Q12873, Q9NRZ9, Q9BQ39	206	107	10057	2.28133	1	0.951747	90.4352
UP_SEQ_FEATURE	domain:Helicase C-terminal	5	1.20192	0.178904	Q9H2U1, P42285, Q12873, Q9NRZ9, Q9BQ39	410	108	20063	2.26547	1	0.995793	95.9342
SMART	SM00487:DEXDc	5	1.20192	0.182484	Q9H2U1, P42285, Q12873, Q9NRZ9, Q9BQ39	206	109	10057	2.23947	1	0.932579	91.5223
UP_SEQ_FEATURE	domain:Helicase ATP-binding	5	1.20192	0.203695	Q9H2U1, P42285, Q12873, Q9NRZ9, Q9BQ39	410	114	20063	2.14623	1	0.99699	97.5293
INTERPRO	IPR001650:Helicase, C-terminal	5	1.20192	0.207989	Q9H2U1, P42285, Q12873, Q9NRZ9, Q9BQ39	404	108	18559	2.12676	1	0.996126	97.3676
INTERPRO	IPR014001:Helicase, superfamily 1/2, ATP-binding domain	5	1.20192	0.217085	Q9H2U1, P42285, Q12873, Q9NRZ9, Q9BQ39	404	110	18559	2.0881	1	0.996583	97.8017
UP_SEQ_FEATURE	short sequence motif:DEAH box	3	0.721154	0.218425	Q9H2U1, Q12873, Q9NRZ9	410	43	20063	3.41401	1	0.997608	98.1758
UP_KEYWORDS	Helicase	5	1.20192	0.323154	Q9H2U1, P42285, Q12873, Q9NRZ9, Q9BQ39	414	143	20581	1.7382	1	0.732976	99.4815
GOTERM_MF_DIRECT	GO:0004386~helicase activity	4	0.961538	0.3244	Q9H2U1, Q12873, Q9NRZ9, Q9BQ39	399	85	16881	1.99098	1	0.985291	99.6869
INTERPRO	IPR011545:DNA/RNA helicase, DEAD/DEAH box type, N-terminal	3	0.721154	0.443737	Q9H2U1, P42285, Q9BQ39	404	69	18559	1.99731	1	0.999894	99.9894
GOTERM_MF_DIRECT	GO:0004004~ATP-dependent RNA helicase activity	3	0.721154	0.455421	Q9H2U1, P42285, Q9BQ39	399	65	16881	1.95269	1	0.995983	99.9868
Annotation Cluster 37	MHC I/Immunoglobulin
Category	Term	Count	%	PValue	Genes	List Total	Pop Hits	Pop Total	Fold Enrichment	Bonferroni	Benjamini	FDR
GOTERM_CC_DIRECT	GO:0012507~ER to Golgi transport vesicle membrane	6	1.44231	0.00536814	Q15436, P03989, P30447, P20039, P30481, P30464, Q9Y6Y8, Q9Y6B6, P30461	398	52	18224	5.28334	0.891718	0.105196	7.26518
GOTERM_BP_DIRECT	GO:0060333~interferon-gamma-mediated signaling pathway	6	1.44231	0.024814	P03989, P30447, P20039, Q9UQM7, P30481, P30464, Q8IYM9, Q14258, P30461	392	71	16792	3.62001	1	0.731653	34.6971
INTERPRO	IPR001039:MHC class I, alpha chain, alpha1/alpha2	3	0.721154	0.0268834	P03989, P30447, P20039, P30481, P30464, P30461	404	12	18559	11.4845	1	0.765602	34.6285
GOTERM_BP_DIRECT	GO:0016045~detection of bacterium	3	0.721154	0.0356056	P03989, P30447, P20039, P30481, P30464, P30461	392	13	16792	9.8854	1	0.74667	45.9281
INTERPRO	IPR011161:MHC class I-like antigen recognition	3	0.721154	0.122987	P03989, P30447, P20039, P30481, P30464, P30461	404	28	18559	4.92194	1	0.978316	87.0887
GOTERM_CC_DIRECT	GO:0071556~integral component of lumenal side of endoplasmic reticulum membrane	3	0.721154	0.130967	P03989, P30447, P20039, P30481, P30464, P30461	398	29	18224	4.73679	1	0.708729	86.0132
UP_SEQ_FEATURE	domain:Ig-like C1-type	3	0.721154	0.138079	P03989, P30447, P20039, P30481, P30464, P30461	410	32	20063	4.58758	1	0.993369	91.0562
GOTERM_MF_DIRECT	GO:0042605~peptide antigen binding	3	0.721154	0.140559	P03989, P30447, P20039, P30481, P30464, P30461	399	28	16881	4.53303	1	0.907313	89.2179
UP_SEQ_FEATURE	region of interest:Connecting peptide	3	0.721154	0.1522	P03989, P30447, P20039, P30481, P30464, P30461	410	34	20063	4.31772	1	0.992628	93.1614
KEGG_PATHWAY	hsa05416:Viral myocarditis	4	0.961538	0.232171	P03989, P30447, P20039, P30481, P06241, P30464, P30461	203	57	6910	2.38873	1	0.831912	96.5021
KEGG_PATHWAY	hsa05332:Graft-versus-host disease	3	0.721154	0.250973	P03989, P30447, P20039, P30481, P30464, P30461	203	33	6910	3.09449	1	0.849156	97.4464
INTERPRO	IPR011162:MHC classes I/II-like antigen recognition protein	3	0.721154	0.255709	P03989, P30447, P20039, P30481, P30464, P30461	404	45	18559	3.06254	1	0.998277	99.0015
KEGG_PATHWAY	hsa05330:Allograft rejection	3	0.721154	0.29471	P03989, P30447, P20039, P30481, P30464, P30461	203	37	6910	2.75995	1	0.869744	98.8101
KEGG_PATHWAY	hsa04940:Type I diabetes mellitus	3	0.721154	0.348814	P03989, P30447, P20039, P30481, P30464, P30461	203	42	6910	2.43139	1	0.884071	99.5679
GOTERM_BP_DIRECT	GO:0019882~antigen processing and presentation	3	0.721154	0.367635	P03989, P30447, P20039, P30481, P30464, P30461	392	55	16792	2.33655	1	0.997174	99.9579
INTERPRO	IPR003006:Immunoglobulin/major histocompatibility complex, conserved site	3	0.721154	0.375529	P03989, P30447, P20039, P30481, P30464, P30461	404	60	18559	2.29691	1	0.999724	99.9354
SMART	SM00407:IGc1	3	0.721154	0.383515	P03989, P30447, P20039, P30481, P30464, P30461	206	65	10057	2.25325	1	0.990684	99.7327
KEGG_PATHWAY	hsa04612:Antigen processing and presentation	4	0.961538	0.384258	P03989, P30447, P20039, P30481, P30464, P30461, P23511	203	76	6910	1.79155	1	0.902475	99.7876
INTERPRO	IPR003597:Immunoglobulin C1-set	3	0.721154	0.436356	P03989, P30447, P20039, P30481, P30464, P30461	404	68	18559	2.02668	1	0.999889	99.9869
KEGG_PATHWAY	hsa05320:Autoimmune thyroid disease	3	0.721154	0.452074	P03989, P30447, P20039, P30481, P30464, P30461	203	52	6910	1.96381	1	0.929491	99.9517
GOTERM_BP_DIRECT	GO:0050776~regulation of immune response	4	0.961538	0.787318	P03989, P30447, Q9BXL7, P30481, P01764, P30464, P30461	392	178	16792	0.962623	1	0.999999	100
GOTERM_BP_DIRECT	GO:0006955~immune response	8	1.92308	0.863226	P03989, P30447, P20039, P30481, P20023, P01764, P30464, Q8IYM9, O00178, P30461, Q13822	392	421	16792	0.814	1	1	100
KEGG_PATHWAY	hsa05166:HTLV-I infection	6	1.44231	0.875251	Q13469, P03989, P30447, O95644, P20039, P30481, P30464, P30536, P30461	203	256	6910	0.797799	1	0.994303	100
KEGG_PATHWAY	hsa05168:Herpes simplex infection	4	0.961538	0.908194	Q9UBU9, P03989, P30447, P20039, P30481, P30464, P30461	203	183	6910	0.744031	1	0.996547	100
KEGG_PATHWAY	hsa04514:Cell adhesion molecules (CAMs)	3	0.721154	0.923981	P03989, P30447, P20039, P30481, P30464, P30461	203	142	6910	0.719142	1	0.997483	100
UP_KEYWORDS	Immunoglobulin domain	3	0.721154	0.999832	P30447, P01764, Q7L513	414	546	20581	0.273146	1	1	100
INTERPRO	IPR007110:Immunoglobulin-like domain	5	1.20192	0.999965	P03989, P30447, P20039, P30481, P01764, P30464, P30461, Q7L513	404	771	18559	0.297913	1	1	100
INTERPRO	IPR013783:Immunoglobulin-like fold	7	1.68269	0.999972	Q13469, P03989, P30447, O95644, P20039, P30481, P01764, P30464, P30461, Q7L513	404	951	18559	0.338135	1	1	100
Annotation Cluster 38	BCR signaling pathway
Category	Term	Count	%	PValue	Genes	List Total	Pop Hits	Pop Total	Fold Enrichment	Bonferroni	Benjamini	FDR
KEGG_PATHWAY	hsa04662:B cell receptor signaling pathway	6	1.44231	0.0506084	Q13469, O95644, Q9BXL7, P20023, Q02750, O00221	203	69	6910	2.95995	0.999987	0.55124	48.2702
BIOCARTA	h_gata3Pathway:GATA3 participate in activating the Th2 cytokine genes expression	3	0.721154	0.087583	Q13469, O95644, P13861	52	16	1625	5.85938	0.999999	0.934873	66.4886
BIOCARTA	h_gpcrPathway:Signaling Pathway from G-Protein Families	4	0.961538	0.0880992	Q13469, O95644, Q02750, P13861	52	34	1625	3.67647	0.999999	0.898757	66.714
BIOCARTA	h_fmlpPathway:fMLP induced chemokine gene expression in HMC-1 cells	4	0.961538	0.107224	Q13469, O95644, Q02750, P14598	52	37	1625	3.37838	1	0.910562	74.1496
BIOCARTA	h_tcrPathway:T Cell Receptor Signaling Pathway	4	0.961538	0.157319	Q13469, O95644, P06241, Q02750	52	44	1625	2.84091	1	0.941209	87.0186
KEGG_PATHWAY	hsa04660:T cell receptor signaling pathway	6	1.44231	0.18278	Q13469, O95644, Q9BXL7, P06241, Q02750, O00221	203	103	6910	1.98288	1	0.801064	92.2834
BIOCARTA	h_vipPathway:Neuropeptides VIP and PACAP inhibit the apoptosis of activated T cells	3	0.721154	0.19522	Q13469, O95644, P13861	52	26	1625	3.60577	1	0.932574	92.5022
BBID	67.Ikaros_and_signaling_inhibitors	3	0.721154	0.206164	Q13469, P06241, Q02750	16	22	388	3.30682	0.998442	0.998442	85.5061
BIOCARTA	h_nfatPathway:NFAT and Hypertrophy of the heart (Transcription in the broken heart)	4	0.961538	0.238517	Q13469, O95644, Q02750, P13861	52	54	1625	2.31481	1	0.94498	96.1233
BIOCARTA	h_bcrPathway:BCR Signaling Pathway	3	0.721154	0.289395	Q13469, O95644, Q02750	52	34	1625	2.75735	1	0.966413	98.3008
BIOCARTA	h_fcer1Pathway:Fc Epsilon Receptor I Signaling in Mast Cells	3	0.721154	0.348147	Q13469, O95644, Q02750	52	39	1625	2.40385	1	0.971055	99.393
KEGG_PATHWAY	hsa04380:Osteoclast differentiation	5	1.20192	0.536622	Q13469, O95644, P06241, Q02750, P14598	203	131	6910	1.29921	1	0.951243	99.9942
KEGG_PATHWAY	hsa04650:Natural killer cell mediated cytotoxicity	4	0.961538	0.697925	Q13469, O95644, P06241, Q02750	203	122	6910	1.11605	1	0.97642	100
KEGG_PATHWAY	hsa05161:Hepatitis B	4	0.961538	0.802171	Q13469, O95644, Q02750, P10415	203	145	6910	0.939018	1	0.988089	100
KEGG_PATHWAY	hsa04921:Oxytocin signaling pathway	4	0.961538	0.846555	Q13469, O95644, Q9UQM7, Q02750	203	158	6910	0.861757	1	0.993252	100
KEGG_PATHWAY	hsa04022:cGMP-PKG signaling pathway	3	0.721154	0.958136	Q13469, O95644, Q02750	203	166	6910	0.61517	1	0.999083	100
Annotation Cluster 39	Viral activity
Category	Term	Count	%	PValue	Genes	List Total	Pop Hits	Pop Total	Fold Enrichment	Bonferroni	Benjamini	FDR
BIOCARTA	h_blymphocytePathway:B Lymphocyte Cell Surface Molecules	3	0.721154	0.0443281	P17927, P20039, P20023	52	11	1625	8.52273	0.998836	0.96588	41.7727
UP_KEYWORDS	Host cell receptor for virus entry	4	0.961538	0.137348	P17927, P20039, P20023, P11279	414	64	20581	3.10704	1	0.484041	86.3556
GOTERM_MF_DIRECT	GO:0001618~virus receptor activity	4	0.961538	0.228421	P17927, P20039, P20023, P11279	399	70	16881	2.41762	1	0.964848	97.7919
GOTERM_BP_DIRECT	GO:0046718~viral entry into host cell	4	0.961538	0.285689	P17927, P49790, P20023, P11279	392	80	16792	2.14184	1	0.992317	99.6673
KEGG_PATHWAY	hsa05152:Tuberculosis	7	1.68269	0.413751	P17927, P20039, Q9UQM7, Q15628, P11279, P23511, P10415	203	177	6910	1.34619	1	0.909558	99.8861
KEGG_PATHWAY	hsa04640:Hematopoietic cell lineage	3	0.721154	0.716006	P17927, P20039, P20023	203	85	6910	1.20139	1	0.978282	100
UP_KEYWORDS	Receptor	10	2.40385	1	O00170, P17927, P20039, P20023, Q9Y2X7, Q00765, P30536, P08240, P11279, Q9UBC2	414	1648	20581	0.301654	1	1	100
Annotation Cluster 40	ANK repeat
Category	Term	Count	%	PValue	Genes	List Total	Pop Hits	Pop Total	Fold Enrichment	Bonferroni	Benjamini	FDR
UP_SEQ_FEATURE	repeat:ANK 12	3	0.721154	0.0511556	Q8IWZ3, Q8NFD2, Q8N8A2	410	18	20063	8.15569	1	0.927446	57.3928
UP_SEQ_FEATURE	repeat:ANK 11	3	0.721154	0.0914716	Q8IWZ3, Q8NFD2, Q8N8A2	410	25	20063	5.8721	1	0.983942	78.9565
UP_SEQ_FEATURE	repeat:ANK 10	3	0.721154	0.117502	Q8IWZ3, Q8NFD2, Q8N8A2	410	29	20063	5.06215	1	0.991182	86.878
UP_SEQ_FEATURE	repeat:ANK 7	4	0.961538	0.137321	Q8IWZ3, Q96KQ7, Q8NFD2, Q8N8A2	410	63	20063	3.10693	1	0.994053	90.9275
UP_SEQ_FEATURE	repeat:ANK 6	5	1.20192	0.143865	Q8IWZ3, Q96KQ7, Q8NFD2, O00221, Q8N8A2	410	99	20063	2.47142	1	0.993936	91.9832
UP_SEQ_FEATURE	repeat:ANK 9	3	0.721154	0.203436	Q8IWZ3, Q8NFD2, Q8N8A2	410	41	20063	3.58055	1	0.99731	97.5162
UP_SEQ_FEATURE	repeat:ANK 8	3	0.721154	0.241069	Q8IWZ3, Q8NFD2, Q8N8A2	410	46	20063	3.19136	1	0.998097	98.8686
UP_SEQ_FEATURE	repeat:ANK 5	5	1.20192	0.328856	Q8IWZ3, Q96KQ7, Q8NFD2, O00221, Q8N8A2	410	142	20063	1.72303	1	0.999472	99.8465
UP_SEQ_FEATURE	repeat:ANK 3	6	1.44231	0.414765	Q8IWZ3, Q96KQ7, Q8NFD2, Q9Y2X7, O00221, Q8N8A2	410	207	20063	1.41838	1	0.999947	99.9834
UP_SEQ_FEATURE	repeat:ANK 4	5	1.20192	0.457375	Q8IWZ3, Q96KQ7, Q8NFD2, O00221, Q8N8A2	410	170	20063	1.43924	1	0.999982	99.9951
UP_SEQ_FEATURE	repeat:ANK 1	6	1.44231	0.557768	Q8IWZ3, Q96KQ7, Q8NFD2, Q9Y2X7, O00221, Q8N8A2	410	244	20063	1.2033	1	0.999999	99.9998
UP_SEQ_FEATURE	repeat:ANK 2	6	1.44231	0.561408	Q8IWZ3, Q96KQ7, Q8NFD2, Q9Y2X7, O00221, Q8N8A2	410	245	20063	1.19839	1	0.999999	99.9998
SMART	SM00248:ANK	6	1.44231	0.576892	Q8IWZ3, Q96KQ7, Q8NFD2, Q9Y2X7, O00221, Q8N8A2	206	249	10057	1.17639	1	0.998889	99.9973
UP_KEYWORDS	ANK repeat	6	1.44231	0.613635	Q8IWZ3, Q96KQ7, Q8NFD2, Q9Y2X7, O00221, Q8N8A2	414	264	20581	1.12983	1	0.921232	99.9997
INTERPRO	IPR002110:Ankyrin repeat	6	1.44231	0.652488	Q8IWZ3, Q96KQ7, Q8NFD2, Q9Y2X7, O00221, Q8N8A2	404	255	18559	1.0809	1	0.999998	100
INTERPRO	IPR020683:Ankyrin repeat-containing domain	6	1.44231	0.685328	Q8IWZ3, Q96KQ7, Q8NFD2, Q9Y2X7, O00221, Q8N8A2	404	265	18559	1.04011	1	0.999999	100
Annotation Cluster 41	tRNA synthetase
Category	Term	Count	%	PValue	Genes	List Total	Pop Hits	Pop Total	Fold Enrichment	Bonferroni	Benjamini	FDR
UP_KEYWORDS	Aminoacyl-tRNA synthetase	3	0.721154	0.176851	P49589, Q9NP81, Q6PI48	414	38	20581	3.92468	1	0.557061	92.7472
GOTERM_BP_DIRECT	GO:0006418~tRNA aminoacylation for protein translation	3	0.721154	0.238666	P49589, Q9NP81, Q6PI48	392	40	16792	3.21276	1	0.987384	99.0191
KEGG_PATHWAY	hsa00970:Aminoacyl-tRNA biosynthesis	3	0.721154	0.579635	P49589, Q9NP81, Q6PI48	203	66	6910	1.54725	1	0.95352	99.9983
Annotation Cluster 42	AGC kinase
Category	Term	Count	%	PValue	Genes	List Total	Pop Hits	Pop Total	Fold Enrichment	Bonferroni	Benjamini	FDR
SMART	SM00133:S_TK_X	3	0.721154	0.271359	Q15418, Q15349, P34947	206	50	10057	2.92922	1	0.980446	97.9294
UP_SEQ_FEATURE	domain:AGC-kinase C-terminal	3	0.721154	0.316757	Q15418, Q15349, P34947	410	56	20063	2.62147	1	0.999409	99.7947
INTERPRO	IPR000961:AGC-kinase, C-terminal	3	0.721154	0.344107	Q15418, Q15349, P34947	404	56	18559	2.46097	1	0.999751	99.8611
Annotation Cluster 43	Mitochondrial respiratory complex
Category	Term	Count	%	PValue	Genes	List Total	Pop Hits	Pop Total	Fold Enrichment	Bonferroni	Benjamini	FDR
GOTERM_CC_DIRECT	GO:0005747~mitochondrial respiratory chain complex I	3	0.721154	0.289315	P17568, Q96CU9, O95182	398	49	18224	2.8034	1	0.874352	99.1652
UP_KEYWORDS	Respiratory chain	3	0.721154	0.361537	P17568, Q96CU9, O95182	414	63	20581	2.36726	1	0.770297	99.764
UP_KEYWORDS	Electron transport	4	0.961538	0.369044	P17568, Q96HE7, Q96CU9, O95182	414	108	20581	1.84121	1	0.77219	99.7988
GOTERM_BP_DIRECT	GO:0032981~mitochondrial respiratory chain complex I assembly	3	0.721154	0.433197	P17568, Q96CU9, O95182	392	63	16792	2.03984	1	0.99906	99.9934
Annotation Cluster 44	EF-hand
Category	Term	Count	%	PValue	Genes	List Total	Pop Hits	Pop Total	Fold Enrichment	Bonferroni	Benjamini	FDR
GOTERM_BP_DIRECT	GO:0006094~gluconeogenesis	4	0.961538	0.0824381	O75746, P43304, P35558, Q9UJS0	392	44	16792	3.89425	1	0.894822	76.7552
UP_SEQ_FEATURE	calcium-binding region:2	5	1.20192	0.220752	P17655, Q03001, O75746, Q7LDG7, Q9UJS0	410	118	20063	2.07348	1	0.997499	98.2621
UP_SEQ_FEATURE	calcium-binding region:1	5	1.20192	0.264861	P17655, Q03001, O75746, Q7LDG7, Q9UJS0	410	128	20063	1.91149	1	0.998954	99.3257
UP_SEQ_FEATURE	domain:EF-hand 2	6	1.44231	0.320636	P17655, Q03001, O75746, P43304, Q7LDG7, Q9UJS0	410	185	20063	1.58705	1	0.999406	99.8129
UP_SEQ_FEATURE	domain:EF-hand 1	6	1.44231	0.320636	P17655, Q03001, O75746, P43304, Q7LDG7, Q9UJS0	410	185	20063	1.58705	1	0.999406	99.8129
SMART	SM00054:EFh	5	1.20192	0.337968	Q03001, O75746, P43304, Q7LDG7, Q9UBC2	206	144	10057	1.69515	1	0.985323	99.36
INTERPRO	IPR018247:EF-Hand 1, calcium-binding site	6	1.44231	0.344397	P17655, Q03001, O75746, P43304, Q7LDG7, Q9UBC2	404	178	18559	1.54848	1	0.999705	99.862
INTERPRO	IPR002048:EF-hand domain	7	1.68269	0.376976	P17655, Q03001, O75746, P43304, Q7LDG7, Q9UBC2, Q9UJS0	404	228	18559	1.41038	1	0.99969	99.9377
INTERPRO	IPR011992:EF-hand-like domain	8	1.92308	0.404042	P17655, Q03001, O75746, P43304, Q9H4E7, Q7LDG7, Q9UBC2, Q9UJS0	404	279	18559	1.31722	1	0.999767	99.9688
UP_SEQ_FEATURE	domain:EF-hand 3	3	0.721154	0.585593	P17655, O75746, Q9UJS0	410	96	20063	1.52919	1	0.999999	99.9999
UP_KEYWORDS	Calcium	13	3.125	0.940345	P17655, Q12907, Q03001, P43304, Q9UBC2, Q13822, Q8IWT0, O75746, Q96GK7, Q02413, Q7LDG7, Q13586, Q9UJS0	414	877	20581	0.736902	1	0.998344	100
GOTERM_MF_DIRECT	GO:0005509~calcium ion binding	11	2.64423	0.976147	P17655, P16455, Q02413, Q03001, O75746, P43304, Q7LDG7, Q9UBC2, Q13586, Q13822, Q9UJS0	399	717	16881	0.649081	1	1	100
Annotation Cluster 45	SH3 domain
Category	Term	Count	%	PValue	Genes	List Total	Pop Hits	Pop Total	Fold Enrichment	Bonferroni	Benjamini	FDR
UP_KEYWORDS	SH3 domain	7	1.68269	0.263195	Q03001, P06241, Q9Y371, Q9UDY2, P14598, O00499, P98171	414	215	20581	1.61855	1	0.681036	98.3719
UP_SEQ_FEATURE	domain:SH3	6	1.44231	0.286117	Q03001, P06241, Q9Y371, Q9UDY2, O00499, P98171	410	175	20063	1.67774	1	0.999103	99.5814
INTERPRO	IPR001452:Src homology-3 domain	6	1.44231	0.516322	P06241, Q9Y371, Q9UDY2, P14598, O00499, P98171	404	218	18559	1.26435	1	0.999959	99.9988
SMART	SM00326:SH3	5	1.20192	0.608995	P06241, Q9Y371, P14598, O00499, P98171	206	206	10057	1.18496	1	0.999178	99.999
Annotation Cluster 46	Thiol protease
Category	Term	Count	%	PValue	Genes	List Total	Pop Hits	Pop Total	Fold Enrichment	Bonferroni	Benjamini	FDR
GOTERM_MF_DIRECT	GO:0004843~thiol-dependent ubiquitin-specific protease activity	4	0.961538	0.292069	Q86UV5, Q96JH7, Q96K76, O00303	399	80	16881	2.11541	1	0.981933	99.3774
UP_KEYWORDS	Thiol protease	5	1.20192	0.368699	Q86UV5, P17655, Q96JH7, Q96K76, O00303	414	153	20581	1.62459	1	0.775204	99.7973
UP_KEYWORDS	Protease	11	2.64423	0.655328	Q86UV5, O43464, P17655, Q96JH7, Q5JRX3, P48147, Q96K76, P52888, O00303, P42785, Q9NQW7	414	544	20581	1.00522	1	0.93915	99.9999
Annotation Cluster 47	Tyrosine-protein kinase
Category	Term	Count	%	PValue	Genes	List Total	Pop Hits	Pop Total	Fold Enrichment	Bonferroni	Benjamini	FDR
BIOCARTA	h_ecmPathway:Erk and PI-3 Kinase Are Necessary for Collagen Binding in Corneal Epithelia	3	0.721154	0.172305	Q05397, P06241, Q02750	52	24	1625	3.90625	1	0.922818	89.5198
GOTERM_MF_DIRECT	GO:0004715~non-membrane spanning protein tyrosine kinase activity	3	0.721154	0.29569	Q9UIG0, Q05397, P06241	399	46	16881	2.75924	1	0.981563	99.4226
BIOCARTA	h_integrinPathway:Integrin Signaling Pathway	3	0.721154	0.324776	Q05397, P06241, Q02750	52	37	1625	2.53378	1	0.974193	99.076
UP_KEYWORDS	Tyrosine-protein kinase	4	0.961538	0.390828	Q9UIG0, Q05397, P06241, Q02750	414	112	20581	1.77545	1	0.783523	99.8747
GOTERM_MF_DIRECT	GO:0004713~protein tyrosine kinase activity	4	0.961538	0.610367	Q9UIG0, Q05397, P06241, Q02750	399	133	16881	1.27243	1	0.998742	99.9999
GOTERM_BP_DIRECT	GO:0018108~peptidyl-tyrosine phosphorylation	4	0.961538	0.695165	Q9UIG0, Q05397, P06241, Q02750	392	153	16792	1.11991	1	0.999992	100
KEGG_PATHWAY	hsa04510:Focal adhesion	5	1.20192	0.858652	P17655, Q05397, P06241, Q02750, P10415	203	206	6910	0.826199	1	0.993852	100
Annotation Cluster 48	GDP binding
Category	Term	Count	%	PValue	Genes	List Total	Pop Hits	Pop Total	Fold Enrichment	Bonferroni	Benjamini	FDR
GOTERM_MF_DIRECT	GO:0019003~GDP binding	4	0.961538	0.134482	P61106, P11233, P35558, Q15907	399	54	16881	3.13395	1	0.902792	88.0411
INTERPRO	IPR005225:Small GTP-binding protein domain	7	1.68269	0.156533	P61106, P11233, Q969S9, Q96BM9, Q15907, P55039, Q9Y6B6	404	167	18559	1.92555	1	0.987744	92.973
UP_SEQ_FEATURE	short sequence motif:Effector region	3	0.721154	0.613279	P61106, P11233, Q15907	410	101	20063	1.45349	1	1	100
UP_SEQ_FEATURE	lipid moiety-binding region:S-geranylgeranyl cysteine	3	0.721154	0.649631	P61106, P11233, Q15907	410	108	20063	1.35928	1	1	100
INTERPRO	IPR001806:Small GTPase superfamily	3	0.721154	0.807938	P61106, P11233, Q15907	404	139	18559	0.99147	1	1	100
UP_KEYWORDS	Prenylation	3	0.721154	0.853747	P61106, P11233, Q15907	414	168	20581	0.887724	1	0.989202	100
Annotation Cluster 49	Transcription
Category	Term	Count	%	PValue	Genes	List Total	Pop Hits	Pop Total	Fold Enrichment	Bonferroni	Benjamini	FDR
UP_KEYWORDS	Repressor	20	4.80769	0.0308795	O14979, O14744, Q92769, Q96ST3, Q9HD42, Q08117, O95319, Q8IYM9, P25490, Q01658, Q8ND56, P41218, Q86SE9, Q15022, A5YKK6, Q13363, O95644, Q9UIV1, Q9BZK7, Q9UKL0	414	592	20581	1.67948	0.999953	0.191216	34.4837
UP_KEYWORDS	Transcription	46	11.0577	0.70807	Q9H2U1, O14744, Q12873, Q9Y294, Q92769, Q06546, Q13573, Q08117, P29083, Q7LBC6, Q01658, Q86SE9, Q13469, P30876, Q6P1J9, A5YKK6, Q15059, Q13363, O95644, Q9Y224, Q9UIV1, Q9BZK7, Q7Z591, Q460N5, Q9UKL0, O14979, O15347, Q96ST2, Q9UIG0, Q96ST3, Q14966, Q9HD42, Q99504, Q9HB58, Q96I24, Q8IYM9, P25490, P41218, Q15022, P49642, Q9NRZ9, Q9NWB6, Q16656, Q02962, Q13761, P23511	414	2398	20581	0.953619	1	0.958548	100
UP_KEYWORDS	Transcription regulation	44	10.5769	0.746357	Q9H2U1, O14744, Q12873, Q9Y294, Q92769, Q06546, Q13573, Q08117, P29083, Q7LBC6, Q01658, Q86SE9, Q13469, Q6P1J9, A5YKK6, Q15059, Q13363, O95644, Q9Y224, Q9UIV1, Q9BZK7, Q7Z591, Q460N5, Q9UKL0, O14979, O15347, Q96ST2, Q9UIG0, Q96ST3, Q14966, Q99504, Q9HD42, Q9HB58, Q96I24, Q8IYM9, P25490, P41218, Q15022, Q9NRZ9, Q9NWB6, Q16656, Q13761, Q02962, P23511	414	2332	20581	0.937973	1	0.969497	100
GOTERM_BP_DIRECT	GO:0006351~transcription, DNA-templated	35	8.41346	0.976065	Q9H2U1, Q12873, Q9Y294, Q92769, Q08117, Q7LBC6, Q01658, Q86SE9, P30876, A5YKK6, Q15059, Q13363, Q9Y224, Q9UIV1, Q9BZK7, Q460N5, Q7Z4V5, Q9UKL0, O14979, O15347, Q96ST2, Q9UIG0, Q96ST3, Q14966, Q99504, Q9HD42, Q9HB58, Q96I24, Q8IYM9, P25490, P41218, Q15022, Q9NRZ9, Q9NWB6, Q02962	392	1955	16792	0.766898	1	1	100
GOTERM_BP_DIRECT	GO:0006355~regulation of transcription, DNA-templated	24	5.76923	0.990827	O14979, O14744, O15347, Q12873, Q9UIG0, Q96ST3, Q14966, Q99504, Q9HB58, Q5VTR2, O95218, P50570, P29083, Q7LBC6, Q8IYM9, P41218, Q13342, Q15022, Q13469, Q9NWB6, Q460N5, Q02962, Q13761, P23511	392	1504	16792	0.683565	1	1	100
Annotation Cluster 50	Cell junction
Category	Term	Count	%	PValue	Genes	List Total	Pop Hits	Pop Total	Fold Enrichment	Bonferroni	Benjamini	FDR
UP_KEYWORDS	Cell junction	16	3.84615	0.370419	Q9UGI8, P15924, Q15836, Q03001, P50570, Q96EY1, Q9UDY2, P19397, Q05397, Q02413, Q9UQM7, O95295, Q15907, Q7LDG7, P0C0L4, P00813	414	675	20581	1.17837	1	0.770394	99.8046
GOTERM_CC_DIRECT	GO:0030054~cell junction	12	2.88462	0.411784	Q9UGI8, P15924, Q15836, Q9UQM7, O95295, Q13426, Q96EY1, Q15907, Q9UDY2, Q7LDG7, P0C0L4, P00813	398	459	18224	1.1971	1	0.9354	99.941
UP_KEYWORDS	Synapse	8	1.92308	0.577607	Q15836, Q9UQM7, O95295, P50570, Q96EY1, Q15907, Q7LDG7, P0C0L4	414	357	20581	1.11401	1	0.905822	99.9991
Annotation Cluster 51	Actin-binding
Category	Term	Count	%	PValue	Genes	List Total	Pop Hits	Pop Total	Fold Enrichment	Bonferroni	Benjamini	FDR
GOTERM_BP_DIRECT	GO:0048013~ephrin receptor signaling pathway	5	1.20192	0.14071	Q92747, Q05397, Q9Y2X7, P06241, P63010	392	86	16792	2.49051	1	0.94682	92.3605
GOTERM_BP_DIRECT	GO:0038096~Fc-gamma receptor signaling pathway involved in phagocytosis	6	1.44231	0.174866	Q92747, Q05397, P01764, P06241, B0I1T2, Q9Y6W5	392	127	16792	2.02378	1	0.968441	96.1601
KEGG_PATHWAY	hsa05100:Bacterial invasion of epithelial cells	4	0.961538	0.400176	Q92747, Q05397, P50570, Q9Y6W5	203	78	6910	1.74561	1	0.909285	99.8477
GOTERM_CC_DIRECT	GO:0030027~lamellipodium	5	1.20192	0.461839	Q14254, Q05397, P50570, B0I1T2, Q9Y6W5	398	160	18224	1.4309	1	0.952468	99.983
GOTERM_CC_DIRECT	GO:0015629~actin cytoskeleton	6	1.44231	0.514842	Q13469, Q92747, Q03001, Q9Y6W5, O00499, Q8N3U4	398	218	18224	1.26025	1	0.967726	99.996
KEGG_PATHWAY	hsa04810:Regulation of actin cytoskeleton	5	1.20192	0.870961	Q92747, Q05397, Q9Y2X7, Q9Y6W5, Q02750	203	211	6910	0.806621	1	0.994832	100
GOTERM_MF_DIRECT	GO:0003779~actin binding	5	1.20192	0.896589	Q92747, Q05397, Q03001, B0I1T2, Q9Y6W5	399	278	16881	0.76094	1	0.999999	100
UP_KEYWORDS	Actin-binding	4	0.961538	0.915126	Q92747, Q03001, B0I1T2, Q9Y6W5	414	274	20581	0.725731	1	0.996458	100
Annotation Cluster 52	Signaling pathway
Category	Term	Count	%	PValue	Genes	List Total	Pop Hits	Pop Total	Fold Enrichment	Bonferroni	Benjamini	FDR
KEGG_PATHWAY	hsa04722:Neurotrophin signaling pathway	6	1.44231	0.273771	Q15418, Q9UQM7, Q15349, Q02750, O00221, P10415	203	120	6910	1.70197	1	0.868959	98.2751
KEGG_PATHWAY	hsa04725:Cholinergic synapse	4	0.961538	0.635219	Q9UQM7, P06241, Q02750, P10415	203	111	6910	1.22665	1	0.959373	99.9997
KEGG_PATHWAY	hsa04066:HIF-1 signaling pathway	3	0.721154	0.786381	Q9UQM7, Q02750, P10415	203	98	6910	1.04202	1	0.987562	100
Annotation Cluster 53	zinc finger region:RING-type
Category	Term	Count	%	PValue	Genes	List Total	Pop Hits	Pop Total	Fold Enrichment	Bonferroni	Benjamini	FDR
INTERPRO	IPR013083:Zinc finger, RING/FYVE/PHD-type	12	2.88462	0.393646	Q86SE9, Q12873, Q9UIG0, Q99590, Q9HB58, Q5VTR2, P29083, Q63HN8, Q8IYM9, Q53GS9, Q14258, Q13342	404	453	18559	1.2169	1	0.999772	99.9592
INTERPRO	IPR017907:Zinc finger, RING-type, conserved site	5	1.20192	0.501689	Q86SE9, Q99590, Q5VTR2, Q8IYM9, Q14258	404	169	18559	1.35912	1	0.999947	99.9981
SMART	SM00184:RING	6	1.44231	0.55873	Q86SE9, Q99590, Q5VTR2, Q63HN8, Q8IYM9, Q14258	206	244	10057	1.2005	1	0.999189	99.9955
INTERPRO	IPR001841:Zinc finger, RING-type	7	1.68269	0.621075	Q86SE9, Q9UIG0, Q99590, Q5VTR2, Q63HN8, Q8IYM9, Q14258	404	295	18559	1.09006	1	0.999996	100
UP_SEQ_FEATURE	zinc finger region:RING-type	5	1.20192	0.692819	Q86SE9, Q5VTR2, Q63HN8, Q8IYM9, Q14258	410	230	20063	1.06379	1	1	100
Annotation Cluster 54	Zinc ion binding
Category	Term	Count	%	PValue	Genes	List Total	Pop Hits	Pop Total	Fold Enrichment	Bonferroni	Benjamini	FDR
INTERPRO	IPR013083:Zinc finger, RING/FYVE/PHD-type	12	2.88462	0.393646	Q86SE9, Q12873, Q9UIG0, Q99590, Q9HB58, Q5VTR2, P29083, Q63HN8, Q8IYM9, Q53GS9, Q14258, Q13342	404	453	18559	1.2169	1	0.999772	99.9592
GOTERM_MF_DIRECT	GO:0008270~zinc ion binding	29	6.97115	0.49377	Q9UGI8, Q12873, P47224, Q13822, Q13342, P21291, Q86SE9, Q5JRX3, Q96KQ7, P49790, O95071, Q14258, P00813, Q9UIG0, Q14966, Q9HD42, Q99590, Q9HB58, Q5VTR2, O95218, Q04760, Q8IYM9, P25490, Q15437, Q15436, Q8TAT6, Q96BW5, Q63HN8, Q53GS9	399	1169	16881	1.04956	1	0.99727	99.9955
UP_KEYWORDS	Zinc	46	11.0577	0.652824	Q9UGI8, Q12873, P29083, Q96EY1, Q7LBC6, P47224, P21291, Q13342, Q13822, Q86SE9, P30876, Q9GZZ9, Q5JRX3, Q96KQ7, P49790, O95071, Q9Y2X7, Q9Y3A3, Q01432, Q7LDG7, Q14258, P62699, P00813, Q9UIG0, P49589, Q14966, Q99590, Q9HB58, Q5VTR2, O95218, Q04760, P52888, P09884, Q8IYM9, P25490, P20042, Q15022, Q8WU79, P16455, P49642, Q8TAT6, Q56NI9, Q9BTE6, Q9BZL6, Q63HN8, Q53GS9	414	2348	20581	0.973926	1	0.939402	99.9999
UP_KEYWORDS	Zinc-finger	28	6.73077	0.953439	Q12873, P29083, Q96EY1, Q7LBC6, Q13342, Q86SE9, P30876, P49790, Q9Y2X7, O95071, Q7LDG7, Q14258, Q9UIG0, Q99590, Q14966, Q9HB58, O95218, P09884, Q8IYM9, P25490, P20042, Q15022, Q8WU79, Q8TAT6, Q56NI9, Q9BZL6, Q63HN8, Q53GS9	414	1781	20581	0.781556	1	0.999009	100
Annotation Cluster 55	SPRY
Category	Term	Count	%	PValue	Genes	List Total	Pop Hits	Pop Total	Fold Enrichment	Bonferroni	Benjamini	FDR
INTERPRO	IPR003879:Butyrophylin-like	3	0.721154	0.465554	Q8WW59, Q8IYM9, Q14258	404	72	18559	1.91409	1	0.999933	99.9943
SMART	SM00449:SPRY	3	0.721154	0.562927	Q8WW59, Q8IYM9, Q14258	206	92	10057	1.59197	1	0.998949	99.996
UP_SEQ_FEATURE	domain:B30.2/SPRY	3	0.721154	0.591245	Q8WW59, Q8IYM9, Q14258	410	97	20063	1.51343	1	0.999999	100
INTERPRO	IPR003877:SPla/RYanodine receptor SPRY	3	0.721154	0.608745	Q8WW59, Q8IYM9, Q14258	404	94	18559	1.46611	1	0.999995	100
INTERPRO	IPR001870:B30.2/SPRY domain	3	0.721154	0.636933	Q8WW59, Q8IYM9, Q14258	404	99	18559	1.39206	1	0.999997	100
INTERPRO	IPR013320:Concanavalin A-like lectin/glucanase, subgroup	4	0.961538	0.882774	Q8WW59, Q12907, Q8IYM9, Q14258	404	232	18559	0.792037	1	1	100
Annotation Cluster 56	GTPase activation
Category	Term	Count	%	PValue	Genes	List Total	Pop Hits	Pop Total	Fold Enrichment	Bonferroni	Benjamini	FDR
GOTERM_BP_DIRECT	GO:0043547~positive regulation of GTPase activity	14	3.36538	0.557551	Q8NDX1, P47224, Q9P035, Q14232, Q8WU79, Q9Y3L3, Q05397, Q9UQM7, P49770, Q9Y2X7, P06241, Q7LDG7, Q14C86, P98171	392	565	16792	1.06144	1	0.999841	99.9999
UP_KEYWORDS	GTPase activation	5	1.20192	0.558596	Q9Y3L3, Q8WU79, Q9Y2X7, Q14C86, P98171	414	197	20581	1.26174	1	0.89784	99.9984
INTERPRO	IPR008936:Rho GTPase activation protein	3	0.721154	0.59105	Q9Y3L3, Q14C86, P98171	404	91	18559	1.51444	1	0.999993	99.9999
GOTERM_MF_DIRECT	GO:0005096~GTPase activator activity	6	1.44231	0.790559	Q9Y3L3, Q8WU79, Q9Y2X7, Q9P035, Q14C86, P98171	399	279	16881	0.909855	1	0.999954	100
Annotation Cluster 57	Complement activation
Category	Term	Count	%	PValue	Genes	List Total	Pop Hits	Pop Total	Fold Enrichment	Bonferroni	Benjamini	FDR
GOTERM_BP_DIRECT	GO:0006958~complement activation, classical pathway	5	1.20192	0.199588	P17927, P20023, P10909, P01764, P0C0L4	392	99	16792	2.16347	1	0.97786	97.7077
GOTERM_BP_DIRECT	GO:0006956~complement activation	3	0.721154	0.604861	P10909, P01764, P0C0L4	392	87	16792	1.47713	1	0.999929	100
GOTERM_CC_DIRECT	GO:0072562~blood microparticle	3	0.721154	0.846979	P10909, P01764, P0C0L4	398	152	18224	0.903729	1	0.999014	100
GOTERM_CC_DIRECT	GO:0005576~extracellular region	6	1.44231	1	Q5EBL8, Q8NCW5, P10909, P01764, P0C0L4, P55081	398	1610	18224	0.170642	1	1	100
UP_KEYWORDS	Secreted	7	1.68269	1	Q5EBL8, Q8NCW5, P10909, P01764, P0C0L4, P55081, Q13822	414	1965	20581	0.177093	1	1	100
Annotation Cluster 58	PI3K-AKT signaling pathway
Category	Term	Count	%	PValue	Genes	List Total	Pop Hits	Pop Total	Fold Enrichment	Bonferroni	Benjamini	FDR
KEGG_PATHWAY	hsa04071:Sphingolipid signaling pathway	5	1.20192	0.467622	P63151, Q15628, P06241, Q02750, P10415	203	120	6910	1.41831	1	0.934345	99.9665
KEGG_PATHWAY	hsa04510:Focal adhesion	5	1.20192	0.858652	P17655, Q05397, P06241, Q02750, P10415	203	206	6910	0.826199	1	0.993852	100
KEGG_PATHWAY	hsa04151:PI3K-Akt signaling pathway	6	1.44231	0.976508	P63151, Q5T1C6, Q05397, P35558, Q02750, P10415	203	345	6910	0.59199	1	0.999697	100
Annotation Cluster 59	RNA polymerase II
Category	Term	Count	%	PValue	Genes	List Total	Pop Hits	Pop Total	Fold Enrichment	Bonferroni	Benjamini	FDR
GOTERM_BP_DIRECT	GO:0006366~transcription from RNA polymerase II promoter	13	3.125	0.537793	P61201, Q06546, P29083, Q96I24, P30876, Q13469, O43148, O95644, Q16656, Q7Z591, Q13761, Q02962, P23511	392	513	16792	1.08553	1	0.999781	99.9998
GOTERM_MF_DIRECT	GO:0001077~transcriptional activator activity, RNA polymerase II core promoter proximal region sequence-specific binding	5	1.20192	0.81079	Q13469, Q06546, Q16656, Q7Z591, Q96I24	399	236	16881	0.896362	1	0.99997	100
GOTERM_MF_DIRECT	GO:0000978~RNA polymerase II core promoter proximal region sequence-specific DNA binding	6	1.44231	0.924269	Q13469, Q92769, Q06546, Q16656, Q7Z591, Q96I24	399	355	16881	0.715069	1	1	100
Annotation Cluster 60	Repeat
Category	Term	Count	%	PValue	Genes	List Total	Pop Hits	Pop Total	Fold Enrichment	Bonferroni	Benjamini	FDR
UP_SEQ_FEATURE	repeat:1	5	1.20192	0.771707	Q13469, Q96ST2, O95644, Q9UKX7, Q9UBC2	410	257	20063	0.952026	1	1	100
UP_SEQ_FEATURE	repeat:2	5	1.20192	0.779405	Q13469, Q96ST2, O95644, Q9UKX7, Q9UBC2	410	260	20063	0.941041	1	1	100
UP_SEQ_FEATURE	repeat:3	3	0.721154	0.945727	O95644, Q9UKX7, Q9UBC2	410	225	20063	0.652455	1	1	100
Annotation Cluster 61	TPR repeat
Category	Term	Count	%	PValue	Genes	List Total	Pop Hits	Pop Total	Fold Enrichment	Bonferroni	Benjamini	FDR
INTERPRO	IPR013026:Tetratricopeptide repeat-containing domain	3	0.721154	0.784385	O00170, Q15785, Q08752	404	132	18559	1.04405	1	1	100
INTERPRO	IPR019734:Tetratricopeptide repeat	3	0.721154	0.804719	O00170, Q15785, Q08752	404	138	18559	0.998655	1	1	100
UP_SEQ_FEATURE	repeat:TPR 1	3	0.721154	0.85055	O00170, Q15785, Q08752	410	164	20063	0.895137	1	1	100
UP_SEQ_FEATURE	repeat:TPR 2	3	0.721154	0.85055	O00170, Q15785, Q08752	410	164	20063	0.895137	1	1	100
UP_KEYWORDS	TPR repeat	3	0.721154	0.851422	O00170, Q15785, Q08752	414	167	20581	0.89304	1	0.989162	100
INTERPRO	IPR011990:Tetratricopeptide-like helical	4	0.961538	0.855576	O00170, Q15785, P61201, Q08752	404	218	18559	0.842901	1	1	100
Annotation Cluster 62	Transmembrane
Category	Term	Count	%	PValue	Genes	List Total	Pop Hits	Pop Total	Fold Enrichment	Bonferroni	Benjamini	FDR
UP_KEYWORDS	Membrane	118	28.3654	0.999816	P17655, Q12907, O43615, P30447, P20039, O00203, Q96EY1, Q86VR2, Q6WKZ4, Q9UBY0, P61106, P49790, Q9UQM7, Q96T37, O95071, Q7LDG7, Q9Y6B6, P10415, Q00765, P50570, P30536, Q9Y5X2, Q96JB2, P11279, Q9H061, Q96BM9, Q9BUB7, Q9H2U1, O15155, Q9UDY2, Q02750, P14598, Q9Y385, P33121, P13861, O43264, Q08378, O43464, Q15785, Q96AG4, P06241, Q15907, P08240, Q13586, Q9UK41, P00813, Q9UJS0, Q5HYJ3, Q14254, P20023,…	414	7494	20581	0.78277	1	1	100
UP_KEYWORDS	Transmembrane helix	51	12.2596	1	Q12907, P30447, Q92769, P20039, O00203, Q9BTV4, Q86VR2, Q8TCC7, Q13822, Q9UBY0, Q02413, O95071, P57088, P10415, Q5TFE4, Q00765, P30536, P11279, P51003, Q9H061, Q96S52, P56378, Q13724, P30464, Q9BUB7, P30461, Q9H2U1, O15155, Q15836, Q9Y385, P33121, O43464, P19397, P03989, O75746, P29372, Q96AG4, Q9BZK7, Q13586, Q9UJS0, Q5HYJ3, P17927, Q03001, P20023, P43304, Q9P035, Q7Z6Z7, Q96CU9, Q9C0B1, Q9BZF1,…	414	5634	20581	0.450007	1	1	100
UP_KEYWORDS	Transmembrane	51	12.2596	1	Q12907, P30447, Q92769, P20039, O00203, Q9BTV4, Q86VR2, Q8TCC7, Q13822, Q9UBY0, Q02413, O95071, P57088, P10415, Q5TFE4, Q00765, P30536, P11279, P51003, Q9H061, Q96S52, P56378, Q13724, P30464, Q9BUB7, P30461, Q9H2U1, O15155, Q15836, Q9Y385, P33121, O43464, P19397, P03989, O75746, P29372, Q96AG4, Q9BZK7, Q13586, Q9UJS0, Q5HYJ3, P17927, Q03001, P20023, P43304, Q9P035, Q7Z6Z7, Q96CU9, Q9C0B1, Q9BZF1,…	414	5651	20581	0.448653	1	1	100
GOTERM_CC_DIRECT	GO:0016021~integral component of membrane	49	11.7788	1	P30447, Q92769, P20039, O00203, Q9BTV4, Q86VR2, Q6PL24, Q8TCC7, Q13822, Q9UBY0, Q02413, O95071, P57088, P10415, Q5TFE4, Q00765, P30536, P11279, P51003, Q9H061, P56378, Q13724, P30464, P30461, Q9H2U1, O15155, Q15836, Q9Y385, P33121, Q15785, O43464, P19397, P03989, O75746, P29372, Q96AG4, Q9BZK7, P08240, Q5HYJ3, P17927, Q03001, P20023, P43304, Q9P035, Q7Z6Z7, Q96CU9, Q9C0B1, Q9BZF1, Q9UKX7, P30481,…	398	5163	18224	0.434565	1	1	100
UP_SEQ_FEATURE	topological domain:Cytoplasmic	19	4.56731	1	P17927, Q12907, P30447, P20039, O15155, Q15836, P20023, P11279, Q9Y385, P33121, Q8TCC7, Q96S52, Q9UBY0, P19397, P03989, Q02413, Q96AG4, P30481, Q13724, P30464, Q13586, P30461	410	3456	20063	0.269025	1	1	100
UP_SEQ_FEATURE	transmembrane region	33	7.93269	1	Q12907, P30447, P20039, O15155, Q15836, Q9BTV4, Q86VR2, Q9Y385, P33121, Q8TCC7, O43464, Q9UBY0, P19397, P03989, Q02413, O75746, Q96AG4, P57088, Q13586, Q9UJS0, P10415, P17927, P20023, Q00765, P30536, P11279, Q9P035, Q9H061, Q96CU9, Q96S52, P30481, Q13724, P30464, Q9BUB7, P30461, A1L0T0	410	5056	20063	0.319388	1	1	100
Annotation Cluster 63	Disulfide bond
Category	Term	Count	%	PValue	Genes	List Total	Pop Hits	Pop Total	Fold Enrichment	Bonferroni	Benjamini	FDR
GOTERM_CC_DIRECT	GO:0005887~integral component of plasma membrane	11	2.64423	0.999998	P17927, Q12907, P20039, P30447, P11279, Q8TCC7, Q13822, P19397, P03989, P30481, P30464, Q13586, P30461, Q9UJS0	398	1415	18224	0.355956	1	1	100
UP_SEQ_FEATURE	signal peptide	21	5.04808	1	P17927, Q12907, P30447, P20039, O60613, Q8NCW5, P20023, P10515, P11279, P42785, Q13822, P03989, Q96HE7, Q02413, P30481, P10909, P01764, P30464, Q13586, P0C0L4, P30461, Q9BXW7, Q8IW45, Q7L513	410	3346	20063	0.307118	1	1	100
UP_KEYWORDS	Disulfide bond	19	4.56731	1	P17927, O15347, Q12907, P30447, P20039, P20023, Q04760, P11279, P42785, Q13822, P17568, Q5JRX3, P03989, Q96HE7, P30481, P10909, P01764, P30464, P0C0L4, P30461, Q96Q11, Q7L513	414	3434	20581	0.275055	1	1	100
UP_SEQ_FEATURE	disulfide bond	13	3.125	1	P17927, P20039, P30447, P20023, P11279, Q13822, Q5JRX3, P03989, Q96HE7, P10909, P30481, P30464, P0C0L4, P30461, Q7L513, Q96Q11	410	2917	20063	0.218082	1	1	100
UP_SEQ_FEATURE	topological domain:Cytoplasmic	19	4.56731	1	P17927, Q12907, P30447, P20039, O15155, Q15836, P20023, P11279, Q9Y385, P33121, Q8TCC7, Q96S52, Q9UBY0, P19397, P03989, Q02413, Q96AG4, P30481, Q13724, P30464, Q13586, P30461	410	3456	20063	0.269025	1	1	100
UP_KEYWORDS	Glycoprotein	26	6.25	1	Q12907, Q01813, P30447, P20039, Q8NCE2, P33121, Q8TCC7, Q13822, Q9UBY0, P19397, P03989, Q02413, P49790, Q13586, Q8IW45, P17927, P20023, P11279, P42785, Q96S52, Q96HE7, P08237, P10909, Q13724, P30481, P30464, O60641, P0C0L4, P30461	414	4551	20581	0.284009	1	1	100
UP_SEQ_FEATURE	topological domain:Extracellular	10	2.40385	1	P17927, P20039, P30447, P20023, Q8TCC7, Q9UBY0, P19397, P03989, Q02413, P30481, P30464, Q13586, P30461	410	2787	20063	0.17558	1	1	100
UP_SEQ_FEATURE	glycosylation site:N-linked (GlcNAc...)	23	5.52885	1	P17927, Q12907, P30447, P20039, Q03001, P20023, Q8NCE2, P11279, Q9H061, P42785, Q8TCC7, Q13822, Q96S52, Q9UBY0, P19397, P03989, Q96HE7, Q02413, P30481, P10909, Q13724, P30464, Q13586, P0C0L4, P30461, Q8IW45	410	4234	20063	0.265821	1	1	100
UP_SEQ_FEATURE	transmembrane region	33	7.93269	1	Q12907, P30447, P20039, O15155, Q15836, Q9BTV4, Q86VR2, Q9Y385, P33121, Q8TCC7, O43464, Q9UBY0, P19397, P03989, Q02413, O75746, Q96AG4, P57088, Q13586, Q9UJS0, P10415, P17927, P20023, Q00765, P30536, P11279, Q9P035, Q9H061, Q96CU9, Q96S52, P30481, Q13724, P30464, Q9BUB7, P30461, A1L0T0	410	5056	20063	0.319388	1	1	100
UP_KEYWORDS	Signal	26	6.25	1	Q12907, Q01813, P30447, P20039, O60613, Q8NCW5, Q8NCE2, Q13822, P03989, Q02413, Q13586, Q7L513, P17927, Q13057, P78406, P20023, P30536, P11279, P42785, Q96HE7, P10909, P01764, P30481, P30464, Q14C86, P0C0L4, Q02962, Q9BXW7, P30461	414	4160	20581	0.310704	1	1	100

## Sheet: 77_CC_M
Annotation Cluster 1	Mitochondrial													Mitochondrial
Category	Term	Count	%	PValue	Genes	List Total	Pop Hits	Pop Total	Fold Enrichment	Bonferroni	Benjamini	FDR		Endoplasmic reticulum
UP_KEYWORDS	Electron transport	4	5.19481	0.00748435	O14561, O95298, P03886, Q16881	77	108	20581	9.89947	0.72532	0.168557	8.77417
GOTERM_CC_DIRECT	GO:0005743~mitochondrial inner membrane	7	9.09091	0.00899992	Q9NYK5, O14561, O95298, P03886, Q86XF0, Q96DV4, Q9Y5T4	75	441	18224	3.85693	0.694048	0.694048	10.0059
GOTERM_CC_DIRECT	GO:0005747~mitochondrial respiratory chain complex I	3	3.8961	0.016913	O14561, O95298, P03886	75	49	18224	14.8767	0.892961	0.672831	18.0381
GOTERM_MF_DIRECT	GO:0008137~NADH dehydrogenase (ubiquinone) activity	3	3.8961	0.0183015	O14561, O95298, P03886	74	48	16881	14.2576	0.943948	0.617296	19.9141
GOTERM_BP_DIRECT	GO:0006120~mitochondrial electron transport, NADH to ubiquinone	3	3.8961	0.0192165	O14561, O95298, P03886	74	49	16792	13.893	0.998876	0.998876	23.3084
UP_KEYWORDS	Respiratory chain	3	3.8961	0.0227296	O14561, O95298, P03886	77	63	20581	12.7279	0.980834	0.390018	24.501
GOTERM_BP_DIRECT	GO:0032981~mitochondrial respiratory chain complex I assembly	3	3.8961	0.0306969	O14561, O95298, P03886	74	63	16792	10.8057	0.999982	0.99573	34.7154
Annotation Cluster 2	Endoplasmic reticulum
Category	Term	Count	%	PValue	Genes	List Total	Pop Hits	Pop Total	Fold Enrichment	Bonferroni	Benjamini	FDR
UP_KEYWORDS	Endoplasmic reticulum	9	11.6883	0.0427571	Q9BY50, Q96CS3, Q99720, Q6NUQ1, O95573, Q8N5M9, O15260, Q99442, Q96S66	77	1067	20581	2.25452	0.999456	0.528392	41.384

## Sheet: 25_PC
Annotation Cluster 1	Immunity												Immunity
Category	Term	Count	%	PValue	Genes	List Total	Pop Hits	Pop Total	Fold Enrichment	Bonferroni	Benjamini	FDR	Cell-cell adhesion
GOTERM_MF_DIRECT	GO:0003823~antigen binding	5	20	8.78638e-06	P01591, P01624, P0CG06, P01880, P04433	23	103	16881	35.629	0.000483136	0.000483136	0.0086418
GOTERM_CC_DIRECT	GO:0072562~blood microparticle	5	20	3.64057e-05	P01591, P01624, P0CG06, P01880, P04433	24	152	18224	24.9781	0.00243625	0.00243625	0.0373325
GOTERM_BP_DIRECT	GO:0006958~complement activation, classical pathway	4	16	0.000244753	P01624, P0CG06, P01880, P04433	22	99	16792	30.8393	0.028709	0.028709	0.280175
GOTERM_BP_DIRECT	GO:0038096~Fc-gamma receptor signaling pathway involved in phagocytosis	4	16	0.000508632	P01624, P0CG06, Q8IZP0, P04433	22	127	16792	24.0401	0.0587464	0.0298177	0.581442
GOTERM_MF_DIRECT	GO:0034987~immunoglobulin receptor binding	3	12	0.000517039	P01591, P0CG06, P01880	23	26	16881	84.6873	0.0280437	0.0141216	0.507391
GOTERM_BP_DIRECT	GO:0038095~Fc-epsilon receptor signaling pathway	4	16	0.00135341	P01624, P0CG06, P51668, P04433	22	178	16792	17.1522	0.148848	0.052304	1.54033
GOTERM_BP_DIRECT	GO:0006898~receptor-mediated endocytosis	4	16	0.00153544	P01591, P01624, P0CG06, P04433	22	186	16792	16.4145	0.167114	0.0446854	1.74585
GOTERM_BP_DIRECT	GO:0006956~complement activation	3	12	0.00522706	P01624, P0CG06, P04433	22	87	16792	26.3197	0.464016	0.0987223	5.83007
GOTERM_BP_DIRECT	GO:0006955~immune response	4	16	0.0148798	P01591, P01624, P01880, P04433	22	421	16792	7.252	0.832035	0.224973	15.788
GOTERM_BP_DIRECT	GO:0050776~regulation of immune response	3	12	0.0205592	P01624, P0CG06, P04433	22	178	16792	12.8641	0.915588	0.265824	21.188
UP_KEYWORDS	Immunoglobulin domain	4	16	0.024845	P01624, P0CG06, P01880, P04433	25	546	20581	6.03106	0.882169	0.656734	23.7137
GOTERM_MF_DIRECT	GO:0004252~serine-type endopeptidase activity	3	12	0.0430537	P01624, P0CG06, P04433	23	255	16881	8.63478	0.911118	0.453986	35.1346
Annotation Cluster 2	Cell-cell adhesion
Category	Term	Count	%	PValue	Genes	List Total	Pop Hits	Pop Total	Fold Enrichment	Bonferroni	Benjamini	FDR
GOTERM_BP_DIRECT	GO:0098609~cell-cell adhesion	4	16	0.00445836	P33176, Q9NR46, Q8IZP0, Q00341	22	271	16792	11.266	0.412413	0.100887	4.99262
GOTERM_MF_DIRECT	GO:0098641~cadherin binding involved in cell-cell adhesion	4	16	0.00606702	P33176, Q9NR46, Q8IZP0, Q00341	23	290	16881	10.1235	0.284449	0.105569	5.80998
GOTERM_CC_DIRECT	GO:0005913~cell-cell adherens junction	4	16	0.00751113	P33176, Q9NR46, Q8IZP0, Q00341	24	323	18224	9.40351	0.396582	0.2232	7.44131

## Sheet: Pathways Suppl.Fig.S8
	Naive B cell			Centroblast			Centrocyte			Memory B cell			Plasma cell			Common
Pathways	UniProt ID	GeneName	Count	UniProt ID	GeneName	Count	UniProt ID	GeneName	Count	UniProt ID	GeneName	Count	UniProt ID	GeneName	Count	UniProt ID	GeneName	Count	N.D.
Metabolic pathways	O95167	NDUFA3	1			0	Q9NX14; Q9BV20; Q00796; P23743	NDUFB11; MRI1; SORD; DGKA	4	Q9H0P0; Q99943; Q96AT9; Q16719; P49902; P48651; P46926; O15269	NT5C3A; AGPAT1; RPE; KYNU; NT5C2; PTDSS1; GNPDA1; SPTLC1	8	P15954; P14854	COX7C; COX6B1	2	Q9Y6M9; Q9UKU7; Q9UJ70; Q9UI09; Q9UHY7; Q9UDW1; Q9UBQ7; Q9P2X0; Q9P2R7; Q9P0J0; Q9NZL9; Q9HCU8; Q9HCC0; Q9H7Z7; Q9BY32; Q9BTZ2; Q9BSD7; Q99714; Q96KP4; Q96IJ6; Q96I99; Q96GD0; Q96G03; Q92506; Q8NFW8; Q8NF37; Q7Z4W1; Q7LG56; Q6P587; Q6NVY1; Q53H12; Q53GQ0; Q4G0N4; Q2TB90; Q16851; Q16836; Q16795; Q16774; Q16718; Q15185; Q15126; Q15102; Q15054; Q14697; Q13907; Q13630; Q13510; Q13423; Q13126; Q02218;…	NDUFB9; ACAD8; NAGK; NDUFA12; ENOPH1; UQCR10; GRHPR; DPM3; SUCLA2; NDUFA13; MAT2B; POLD4; MCCC2; PTGES2; ITPA; DHRS4; NTPCR; HSD17B10; CNDP2; GMPPA; SUCLG2; PDXP; PGM2; HSD17B8; CMAS; LPCAT1; DCXR; RRM2B; FAHD1; HIBCH; AGK; HSD17B12; NADK2; HKDC1; UGP2; HADH; NDUFA9; GUK1; NDUFA5; PTGES3; PMVK; PAFAH1B3; POLD3; GANAB; IDI1; TSTA3; ASAH1; NNT; MTAP; OGDH; CYCS; POLR2G; DAD1; ATP6V0D1; PRPS1; NDUFA…	315	0
Cell cycle			0	Q13616	CUL1	1			0	Q9H1A4	ANAPC1	1			0	Q9Y6D9; Q13547; Q13315; Q04917; P78527; P63208; P62877; P49736; P33993; P33992; P31947; P25205; P06493; P06400; O60216; O43684; Q9UQE7; Q14683; Q14566; P63104; P62258; P61981; P33991; P31946; P27348; P12004; Q92769; Q8N3U4; Q8WVM7	MAD1L1; HDAC1; ATM; YWHAH; PRKDC; SKP1; RBX1; MCM2; MCM7; MCM5; SFN; MCM3; CDK1; RB1; RAD21; BUB3; SMC3; SMC1A; MCM6; YWHAZ; YWHAE; YWHAG; MCM4; YWHAB; YWHAQ; PCNA; HDAC2; STAG2; STAG1	29	124
Spliceosome			0			0			0			0	P09234	SNRPC	1	Q9Y5S9; Q9Y4Z0; Q9Y3C6; Q9Y3B4; Q9Y333; Q9UNP9; Q9UKV3; Q9UK45; Q9UHX1; Q9NW64; Q9BUQ8; Q99459; Q96NC0; Q96J01; Q96DI7; Q96A72; Q92620; Q8WYA6; Q8WWY3; Q8WVK2; Q86XP3; Q7L014; Q6P2Q9; Q32P51; Q16629; Q15459; Q15428; Q15427; Q15393; Q15029; Q13838; Q13595; Q13247; Q13243; Q13242; Q09161; Q07955; Q01130; P84103; P62995; P62316; P62314; P62312; P62310; P62306; P61326; P52298; P49756; P41223; P38919;…	RBM8A; LSM4; PPIL1; SF3B6; LSM2; PPIE; ACIN1; LSM7; PUF60; RBM22; DDX23; CDC5L; ZMAT2; THOC3; SNRNP40; MAGOHB; DHX38; CTNNBL1; PRPF31; SNRNP27; DDX42; DDX46; PRPF8; HNRNPA1L2; SRSF7; SF3A1; SF3A2; SF3B4; SF3B3; EFTUD2; DDX39B; TRA2A; SRSF6; SRSF5; SRSF9; NCBP1; SRSF1; SRSF2; SRSF3; TRA2B; SNRPD2; SNRPD1; LSM6; LSM3; SNRPF; MAGOH; NCBP2; RBM25; BUD31; EIF4A3; RBMX; U2AF2; SNRPB; HSPA1A; HSPA1B; HS…	108	134
Protein export			0			0			0			0	P60059	SEC61G	1	Q9Y5M8; Q9UHB9; Q15005; P67812; P61011; P61009; P60468; O76094; P49458; P37108; P11021; P08240; Q9BY50; Q99442	SRPRB; SRP68; SPCS2; SEC11A; SRP54; SPCS3; SEC61B; SRP72; SRP9; SRP14; HSPA5; SRPR; SEC11C; SEC62	14	23
Ribosome	Q7Z2W9	MRPL21	1			0	Q9BYD2; Q92901; P82933	MRPL9; RPL3L; MRPS9	3			0			0	Q9Y3U8; Q9Y3B7; Q9Y2R9; Q9P015; Q9NWU5; Q9H0U6; Q9BYD6; Q96L21; Q71UM5; Q6P5R6; Q6P1L8; Q16540; Q07020; Q02878; P84098; P83881; P82932; P82921; P82664; P63173; P62979; P62917; P62906; P62857; P62854; P62854; P62851; P62847; P62841; P62277; P62269; P62266; P62244; P61353; P61313; P61247; P52815; P50914; P46783; P46781; P42766; P39023; P35268; P23396; P18621; P15880; P05388; O60783; Q9UNX3; Q02543;…	RPL36; MRPL11; MRPS7; MRPL15; MRPL22; MRPL18; MRPL1; RPL10L; RPS27L; RPL22L1; MRPL14; MRPL23; RPL18; RPL6; RPL19; RPL36A; MRPS6; MRPS21; MRPS10; RPL38; RPS27A; RPL8; RPL10A; RPS28; RPS26; LOC101929876; RPS26; LOC101929876; RPS25; RPS24; RPS15; RPS13; RPS18; RPS23; RPS15A; RPL27; RPL15; RPS3A; MRPL12; RPL14; RPS10; RPS9; RPL35; RPL3; RPL22; RPS3; RPL17; RPS2; RPLP0; MRPS14; RPL26L1; RPL18A; RPL24;…	101	154
mTOR signaling pathway			0			0	Q15382	RHEB	1	Q9BPZ7	MAPKAP1	1			0	Q9Y376; Q9Y2Q5; Q9UHA4; Q9HB90; Q6IAA8; Q0VGL1; P61586; P28482; P27986; P27361; P21281; P17252; P08195; P06730; P05771; P01112; O75348; P62993; P62753; P55735; P38606; Q9Y5K8; Q7L523; Q15418; Q15349; Q02750; P36543; P15313; O00144	CAB39; LAMTOR2; LAMTOR3; RRAGC; LAMTOR1; LAMTOR4; RHOA; MAPK1; PIK3R1; MAPK3; ATP6V1B2; PRKCA; SLC3A2; EIF4E; PRKCB; HRAS; ATP6V1G1; GRB2; RPS6; SEC13; ATP6V1A; ATP6V1D; RRAGA; RPS6KA1; RPS6KA2; MAP2K1; ATP6V1E1; ATP6V1B1; FZD9	29	121
Fc gamma R-mediated phagocytosis			0	P52735; P15498	VAV2; VAV1	2	P49418; P46108	AMPH; CRK	2			0			0	Q9Y281; Q9BPX5; Q92835; Q92608; Q05655; P63000; P62330; P60953; P49006; P46109; P43405; P42768; P29966; P28482; P27986; P27361; P17252; P16885; P15153; P08631; P08575; P07948; P06396; P05771; O15511; O15145; O15143; P59998; P50552; P23528; O15144; Q13153; Q9Y6W5; Q92747; Q02750; P50570; P14598; O00499; O43150	CFL2; ARPC5L; INPP5D; DOCK2; PRKCD; RAC1; ARF6; CDC42; MARCKSL1; CRKL; SYK; WAS; MARCKS; MAPK1; PIK3R1; MAPK3; PRKCA; PLCG2; RAC2; HCK; PTPRC; LYN; GSN; PRKCB; ARPC5; ARPC3; ARPC1B; ARPC4; VASP; CFL1; ARPC2; PAK1; WASF2; ARPC1A; MAP2K1; DNM2; NCF1; BIN1; ASAP2	39	66
Proteasome			0			0			0			0			0	Q9UNM6; Q9UL46; Q99460; Q99436; Q8TAA3; Q15008; Q13200; P62333; P62195; P62191; P61289; P60900; P49721; P49720; P48556; P35998; P28074; P28072; P28066; P28065; P28062; P25789; P25788; P25786; P20618; P17980; O43242; O14818; O00487; O00232; Q06323; P40306; P28070; P25787; O00231; Q92530; P55036; P51665; P43686; Q16186	PSMD13; PSME2; PSMD1; PSMB7; PSMA8; PSMD6; PSMD2; PSMC6; PSMC5; PSMC1; PSME3; PSMA6; PSMB2; PSMB3; PSMD8; PSMC2; PSMB5; PSMB6; PSMA5; PSMB9; PSMB8; PSMA4; PSMA3; PSMA1; PSMB1; PSMC3; PSMD3; PSMA7; PSMD14; PSMD12; PSME1; PSMB10; PSMB4; PSMA2; PSMD11; PSMF1; PSMD4; PSMD7; PSMC4; ADRM1	40	166
Antigen processing and presentation			0			0			0	Q99538	LGMN	1			0	Q9UL46; Q30154; Q13952; Q03519; P79483; P61769; P61289; P48382; P30443; P27824; P25774; P20036; P13765; P0DMV8; P0DMV8; P06340; P04440; P04233; P01920; P01912; P01909; P01906; P01903; P01889; O15533; Q06323; P54652; P34932; P34931; P30101; P27797; P11142; P11021; P08238; P07900; Q03518; P23511; P25208	PSME2; HLA-DRB5; NFYC; TAP2; HLA-DRB3; B2M; PSME3; RFX5; HLA-A; CANX; CTSS; HLA-DPA1; HLA-DOB; HSPA1A; HSPA1B; HSPA1A; HSPA1B; HLA-DOA; HLA-DPB1; CD74; HLA-DQB1; HLA-DRB1; HLA-DQA1; HLA-DQA2; HLA-DRA; HLA-B; TAPBP; PSME1; HSPA2; HSPA4; HSPA1L; PDIA3; CALR; HSPA8; HSPA5; HSP90AB1; HSP90AA1; TAP1; NFYA; NFYB	38	45
MAPK signaling pathway			0			0	P46108	CRK	1	P45984	MAPK9	1			0	Q9UHA4; Q9UER7; Q92918; Q13177; Q13043; Q08209; Q00653; P63098; P63000; P62834; P62070; P61244; P61224; P60953; P46109; P45983; P42574; P35236; P28482; P27361; P21333; P19838; P17612; P17252; P15153; P0DMV8; P0DMV8; P05771; P04792; P01112; O95819; P62993; P54652; P34931; P16949; P11142; Q13153; P22694; Q7LDG7; Q15418; Q15349; Q13188; Q02750; O95644; P51452; P53041	LAMTOR3; DAXX; MAP4K1; PAK2; STK4; PPP3CA; NFKB2; PPP3R1; RAC1; RAP1A; RRAS2; MAX; RAP1B; CDC42; CRKL; MAPK8; CASP3; PTPN7; MAPK1; MAPK3; FLNA; NFKB1; PRKACA; PRKCA; RAC2; HSPA1A; HSPA1B; HSPA1A; HSPA1B; PRKCB; HSPB1; HRAS; MAP4K4; GRB2; HSPA2; HSPA1L; STMN1; HSPA8; PAK1; PRKACB; RASGRP2; RPS6KA1; RPS6KA2; STK3; MAP2K1; NFATC1; DUSP3; PPP5C	46	45
Pyruvate metabolism			0			0			0			0			0	Q9UBQ7; P49189; P23368; P14621; P09622; P07954; P07311; P05091; P00338; Q6ZMR3; Q16822; P40926; P40925; P24752; P14618; P11177; P08559; P07195; Q9BWD1; Q04760; P35558; P30837; P10515; Q16775	GRHPR; ALDH9A1; ME2; ACYP2; DLD; FH; ACYP1; ALDH2; LDHA; LDHAL6A; PCK2; MDH2; MDH1; ACAT1; PKM; PDHB; PDHA1; LDHB; ACAT2; GLO1; PCK1; ALDH1B1; DLAT; HAGH	24	137
Citrate cycle (TCA cycle)			0			0			0			0			0	Q9P2R7; Q96I99; Q02218; P53597; P53396; P51553; P50213; P48735; P36957; P31040; P21912; P09622; P07954; O75390; Q99798; Q16822; P40926; P40925; P11177; P08559; P35558; P21399; P10515; O75874; O43837	SUCLA2; SUCLG2; OGDH; SUCLG1; ACLY; IDH3G; IDH3A; IDH2; DLST; SDHA; SDHB; DLD; FH; CS; ACO2; PCK2; MDH2; MDH1; PDHB; PDHA1; PCK1; ACO1; DLAT; IDH1; IDH3B	25	39
DNA replication	Q8TDP1	RNASEH2C	1			0			0			0			0	Q9HCU8; Q15054; P49736; P49643; P49005; P40938; P40937; P35251; P35250; P35249; P35244; P33993; P33992; P28340; P27694; P25205; P18858; P15927; O75792; Q14566; Q04837; P39748; P33991; P12004; Q5TBB1; P49642; P09884; Q9NRF9	POLD4; POLD3; MCM2; PRIM2; POLD2; RFC3; RFC5; RFC1; RFC2; RFC4; RPA3; MCM7; MCM5; POLD1; RPA1; MCM3; LIG1; RPA2; RNASEH2A; MCM6; SSBP1; FEN1; MCM4; PCNA; RNASEH2B; PRIM1; POLA1; POLE3	28	0
Chemokine signaling pathway			0	P52735; P15498	VAV2; VAV1	2	P46108	CRK	1	Q13464	ROCK1	1			0	Q9HAV0; Q92608; Q92556; Q8TCU6; Q14289; Q05655; P63096; P63000; P62879; P62834; P61586; P61224; P60953; P59768; P51684; P46109; P42768; P42224; P40763; P28482; P27986; P27361; P19838; P17612; P15153; P08754; P08631; P07948; P05771; P04899; P01112; P62993; P62873; P25098; Q13153; P22694; Q7LDG7; Q05397; Q02750; P34947; P14598	GNB4; DOCK2; ELMO1; PREX1; PTK2B; PRKCD; GNAI1; RAC1; GNB2; RAP1A; RHOA; RAP1B; CDC42; GNG2; CCR6; CRKL; WAS; STAT1; STAT3; MAPK1; PIK3R1; MAPK3; NFKB1; PRKACA; RAC2; GNAI3; HCK; LYN; PRKCB; GNAI2; HRAS; GRB2; GNB1; ADRBK1; PAK1; PRKACB; RASGRP2; PTK2; MAP2K1; GRK5; NCF1	41	227
PI3K-Akt signaling pathway			0			0	Q15382	RHEB	1	P05556	ITGB1	1			0	Q9HAV0; Q6ZUJ8; Q16543; Q14738; Q04917; P67775; P63000; P62879; P59768; P56279; P43405; P28482; P27986; P27361; P19838; P17252; P06730; P01112; Q16822; P63104; P62993; P62873; P62753; P62258; P61981; P31946; P30153; P27348; P14625; P08238; P07900; Q5T1C6; Q05397; Q02750; P63151; P35558; P10415; Q13362; P48736	GNB4; PIK3AP1; CDC37; PPP2R5D; YWHAH; PPP2CA; RAC1; GNB2; GNG2; TCL1A; SYK; MAPK1; PIK3R1; MAPK3; NFKB1; PRKCA; EIF4E; HRAS; PCK2; YWHAZ; GRB2; GNB1; RPS6; YWHAE; YWHAG; YWHAB; PPP2R1A; YWHAQ; HSP90B1; HSP90AB1; HSP90AA1; THEM4; PTK2; MAP2K1; PPP2R2A; PCK1; BCL2; PPP2R5C; PIK3CG	39	182
TNF signaling pathway			0	Q13158	FADD	1			0	P45984	MAPK9	1			0	Q96HS1; P45983; P42574; P28482; P27986; P27361; P19838; P05362; O00429; Q15628; Q02750	PGAM5; MAPK8; CASP3; MAPK1; PIK3R1; MAPK3; NFKB1; ICAM1; DNM1L; TRADD; MAP2K1	11	132
Glycolysis / Gluconeogenesis			0			0			0			0			0	Q96G03; Q2TB90; P49189; P36871; P19367; P17858; P14550; P13929; P11766; P09972; P09622; P09104; P07738; P06744; P05091; P00338; O14556; Q6ZMR3; Q16822; P60174; P18669; P14618; P11177; P08559; P07195; P06733; P04406; P04075; P00558; Q01813; P35558; P30837; P10515; P08237	PGM2; HKDC1; ALDH9A1; PGM1; HK1; PFKL; AKR1A1; ENO3; ADH5; ALDOC; DLD; ENO2; BPGM; GPI; ALDH2; LDHA; GAPDHS; LDHAL6A; PCK2; TPI1; PGAM1; PKM; PDHB; PDHA1; LDHB; ENO1; GAPDH; ALDOA; PGK1; PFKP; PCK1; ALDH1B1; DLAT; PFKM	34	108
Phosphatidylinositol signaling system			0			0	P23743	DGKA	1			0			0	Q92835; Q14643; P48426; P29218; P27986; P17252; P16885; P05771; Q8NCE2; P27482; O95674	INPP5D; ITPR1; PIP4K2A; IMPA1; PIK3R1; PRKCA; PLCG2; PRKCB; MTMR14; CALML3; CDS2	11	145
B cell receptor signaling pathway			0	P52735; P15498	VAV2; VAV1	2			0			0			0	Q92835; Q8WV28; Q6ZUJ8; Q08209; Q06187; P63098; P63000; P60033; P43405; P40259; P28482; P27986; P27361; P20273; P19838; P16885; P15153; P13164; P07948; P05771; P01112; P62993; P29350; Q9BXL7; Q13469; Q02750; P20023; O95644; O00221	INPP5D; BLNK; PIK3AP1; PPP3CA; BTK; PPP3R1; RAC1; CD81; SYK; CD79B; MAPK1; PIK3R1; MAPK3; CD22; NFKB1; PLCG2; RAC2; IFITM1; LYN; PRKCB; HRAS; GRB2; PTPN6; CARD11; NFATC2; MAP2K1; CR2; NFATC1; NFKBIE	29	97
Fc epsilon RI signaling pathway			0	P52735; P15498	VAV2; VAV1	2			0	P45984	MAPK9	1			0	Q92835; Q06187; P63000; P45983; P43405; P28482; P27986; P27361; P20292; P17252; P16885; P15153; P09917; P07948; P01112; P62993; Q02750; P06241	INPP5D; BTK; RAC1; MAPK8; SYK; MAPK1; PIK3R1; MAPK3; ALOX5AP; PRKCA; PLCG2; RAC2; ALOX5; LYN; HRAS; GRB2; MAP2K1; FYN	18	71
NF-kappa B signaling pathway			0			0			0			0			0	Q8WV28; Q13315; Q06187; Q00653; P68400; P67870; P63279; P43405; P19838; P16885; P07948; P05771; P05362; P09874; Q9BXL7; Q15628; Q14258; P10415; O95786	BLNK; ATM; BTK; NFKB2; CSNK2A1; CSNK2B; UBE2I; SYK; NFKB1; PLCG2; LYN; PRKCB; ICAM1; PARP1; CARD11; TRADD; TRIM25; BCL2; DDX58	19	68
AMPK signaling pathway			0			0	Q15382	RHEB	1			0			0	Q9Y376; Q15717; Q14738; P67775; P61026; P61019; P61006; P49327; P27986; P17858; Q16822; P30153; P13639; Q15907; Q01813; P63151; P61106; P35558; P08237; Q13362; O95822	CAB39; ELAVL1; PPP2R5D; PPP2CA; RAB10; RAB2A; RAB8A; FASN; PIK3R1; PFKL; PCK2; PPP2R1A; EEF2; RAB11B; PFKP; PPP2R2A; RAB14; PCK1; PFKM; PPP2R5C; MLYCD	21	44
IL-17 signaling pathway			0	Q13158	FADD	1			0	P45984	MAPK9	1			0	Q15717; Q07955; P45983; P42574; P28482; P27361; P19838; P06702; P14625; P08238; P07900; P05109; Q15628	ELAVL1; SRSF1; MAPK8; CASP3; MAPK1; MAPK3; NFKB1; S100A9; HSP90B1; HSP90AB1; HSP90AA1; S100A8; TRADD	13	93
ErbB signaling pathway			0			0	P46108	CRK	1	P45984	MAPK9	1			0	Q13557; Q13177; P46109; P45983; P42229; P28482; P27986; P27361; P17252; P16885; P05771; P01112; P62993; Q13153; Q9UQM7; Q05397; Q02750	CAMK2D; PAK2; CRKL; MAPK8; STAT5A; MAPK1; PIK3R1; MAPK3; PRKCA; PLCG2; PRKCB; HRAS; GRB2; PAK1; CAMK2A; PTK2; MAP2K1	17	86
cAMP signaling pathway			0	P52735; P15498	VAV2; VAV1	2			0	Q13464; P45984	ROCK1; MAPK9	2			0	Q13557; P63096; P63000; P62834; P62140; P62136; P62070; P61586; P61224; P45983; P36873; P28482; P27986; P27361; P19838; P17612; P15153; P08754; P05023; P04899; O14974; P16615; Q13153; P22694; Q9UQM7; Q08499; Q02750; O95644; P27482; P20020	CAMK2D; GNAI1; RAC1; RAP1A; PPP1CB; PPP1CA; RRAS2; RHOA; RAP1B; MAPK8; PPP1CC; MAPK1; PIK3R1; MAPK3; NFKB1; PRKACA; RAC2; GNAI3; ATP1A1; GNAI2; PPP1R12A; ATP2A2; PAK1; PRKACB; CAMK2A; PDE4D; MAP2K1; NFATC1; CALML3; ATP2B1	30	198
Wnt signaling pathway			0	Q13616	CUL1	1			0	P45984	MAPK9	1			0	Q13557; Q08209; P68400; P67870; P63208; P63098; P63000; P62877; P61586; P45983; P17612; P17252; P15153; P05771; Q9Y265; P22694; Q9UQM7; Q9HB71; Q9BZK7; Q13469; Q13363; O95644; O00144	CAMK2D; PPP3CA; CSNK2A1; CSNK2B; SKP1; PPP3R1; RAC1; RBX1; RHOA; MAPK8; PRKACA; PRKCA; RAC2; PRKCB; RUVBL1; PRKACB; CAMK2A; CACYBP; TBL1XR1; NFATC2; CTBP1; NFATC1; FZD9	23	143
Notch signaling pathway			0			0			0			0			0	Q13547; Q92769; Q13573; Q13363	HDAC1; HDAC2; SNW1; CTBP1	4	48
VEGF signaling pathway			0			0			0			0			0	Q08209; P63098; P63000; P60953; P28482; P27986; P27361; P17252; P16885; P15153; P05771; P04792; P01112; Q13469; Q05397; Q02750	PPP3CA; PPP3R1; RAC1; CDC42; MAPK1; PIK3R1; MAPK3; PRKCA; PLCG2; RAC2; PRKCB; HSPB1; HRAS; NFATC2; PTK2; MAP2K1	16	59
EGFR tyrosine kinase inhibitor resistance			0			0			0			0			0	Q07812; P40763; P28482; P27986; P27361; P17252; P16885; P06730; P05771; P01112; P62993; P62753; Q02750; P10415	BAX; STAT3; MAPK1; PIK3R1; MAPK3; PRKCA; PLCG2; EIF4E; PRKCB; HRAS; GRB2; RPS6; MAP2K1; BCL2	14	0
TGF-beta signaling pathway			0	Q13616	CUL1	1			0	Q13464	ROCK1	1			0	P67775; P63208; P62877; P61586; P28482; P27361; P30153	PPP2CA; SKP1; RBX1; RHOA; MAPK1; MAPK3; PPP2R1A	7	84
Toll-like receptor signaling pathway			0	Q13158	FADD	1			0	P45984	MAPK9	1			0	P63000; P45983; P42224; P28482; P27986; P27361; P19838; Q02750; Q9H0E2	RAC1; MAPK8; STAT1; MAPK1; PIK3R1; MAPK3; NFKB1; MAP2K1; TOLLIP	9	104
Jak-STAT signaling pathway			0			0			0	Q00978	IRF9	1			0	P42229; P42224; P40763; P27986; P01112; P62993; P29350; P10415	STAT5A; STAT1; STAT3; PIK3R1; HRAS; GRB2; PTPN6; BCL2	8	156
