# Supplementary material for: Dynamic Intracellular Metabolic Cell Signaling Profiles During Ag-Dependent B-Cell Differentiation
Source: Front Immunol. 2021 Mar 30;12:637832. doi: 10.3389/fimmu.2021.637832 (PMC8043114; doi:10.3389/fimmu.2021.637832)
Supplement: Supplementary Table 7 — Data set missing proteins detected by MS/MS. Information on missing proteins detected after proteomic analyses in progress of B-lymphocyte differentiation during antigen-dependent phase. [file Table_7.xlsx]

## Sheet: Proteins
acc. code	protein name	gene name(s)	chromosome	proteomics	disease	structure	#isof.	#variants	#PTMS	mutagenesis	tissue expr.	PE
NX_A6NHR9	Structural maintenance of chromosomes flexible hinge domain-containing protein 1	SMCHD1	18p11.32	yes	yes	no	3	1340	22	yes	yes	Evidence at protein level
NX_A6NI72	Putative neutrophil cytosol factor 1B	NCF1B	7q11.23	yes	no	no	1	0	6	no	no	Uncertain
NX_O00154	Cytosolic acyl coenzyme A thioester hydrolase	ACOT7	1p36.31	yes	no	yes	7	395	8	no	yes	Evidence at protein level
NX_O00221	NF-kappa-B inhibitor epsilon	NFKBIE	6p21.1	yes	no	no	1	440	8	yes	yes	Evidence at protein level
NX_O00231	26S proteasome non-ATPase regulatory subunit 11	PSMD11	17q11.2	yes	no	yes	2	173	14	yes	yes	Evidence at protein level
NX_O00232	26S proteasome non-ATPase regulatory subunit 12	PSMD12	17q24.2	yes	yes	yes	2	285	16	no	yes	Evidence at protein level
NX_O00303	Eukaryotic translation initiation factor 3 subunit F	EIF3F	11p15.4	yes	yes	yes	1	326	12	yes	yes	Evidence at protein level
NX_O00422	Histone deacetylase complex subunit SAP18	SAP18	13q12.11	yes	no	yes	2	125	5	yes	yes	Evidence at protein level
NX_O00425	Insulin-like growth factor 2 mRNA-binding protein 3	IGF2BP3	7p15.3	yes	no	yes	2	377	16	yes	yes	Evidence at protein level
NX_O00487	26S proteasome non-ATPase regulatory subunit 14	PSMD14	2q24.2	yes	no	yes	1	73	8	yes	yes	Evidence at protein level
NX_O00541	Pescadillo homolog	PES1	22q12.2	yes	no	yes	2	486	13	yes	yes	Evidence at protein level
NX_O00762	Ubiquitin-conjugating enzyme E2 C	UBE2C	20q13.12	yes	no	yes	4	179	5	yes	yes	Evidence at protein level
NX_O00764	Pyridoxal kinase	PDXK	21q22.3	yes	no	yes	3	199	9	no	yes	Evidence at protein level
NX_O14556	Glyceraldehyde-3-phosphate dehydrogenase, testis-specific	GAPDHS	19q13.12	yes	no	yes	1	376	2	no	yes	Evidence at protein level
NX_O14921	Regulator of G-protein signaling 13	RGS13	1q31.2	yes	no	no	1	152	0	no	yes	Evidence at transcript level
NX_O14929	Histone acetyltransferase type B catalytic subunit	HAT1	2q31.1	yes	no	yes	2	274	9	yes	yes	Evidence at protein level
NX_O14980	Exportin-1	XPO1	2p15	yes	yes	yes	1	386	28	yes	yes	Evidence at protein level
NX_O15042	U2 snRNP-associated SURP motif-containing protein	U2SURP	3q23	yes	no	no	3	541	46	no	yes	Evidence at protein level
NX_O15160	DNA-directed RNA polymerases I and III subunit RPAC1	POLR1C	6p21.1	yes	yes	no	2	406	7	yes	yes	Evidence at protein level
NX_O15269	Serine palmitoyltransferase 1	SPTLC1	9q22.31	yes	yes	no	2	342	5	yes	yes	Evidence at protein level
NX_O15392	Baculoviral IAP repeat-containing protein 5	BIRC5	17q25.3	yes	no	yes	7	155	12	yes	yes	Evidence at protein level
NX_O15533	Tapasin	TAPBP	6p21.32	yes	yes	yes	4	419	6	yes	yes	Evidence at protein level
NX_O43143	Pre-mRNA-splicing factor ATP-dependent RNA helicase DHX15	DHX15	4p15.2	yes	no	yes	1	270	16	no	yes	Evidence at protein level
NX_O43175	D-3-phosphoglycerate dehydrogenase	PHGDH	1p12	yes	yes	yes	1	458	26	yes	yes	Evidence at protein level
NX_O43242	26S proteasome non-ATPase regulatory subunit 3	PSMD3	17q21.1	yes	no	yes	2	365	18	no	yes	Evidence at protein level
NX_O43252	Bifunctional 3'-phosphoadenosine 5'-phosphosulfate synthase 1	PAPSS1	4q25	yes	no	yes	1	389	7	yes	yes	Evidence at protein level
NX_O43390	Heterogeneous nuclear ribonucleoprotein R	HNRNPR	1p36.12	yes	no	yes	4	327	19	no	yes	Evidence at protein level
NX_O43395	U4/U6 small nuclear ribonucleoprotein Prp3	PRPF3	1q21.2	yes	yes	yes	2	264	19	yes	yes	Evidence at protein level
NX_O43464	Serine protease HTRA2, mitochondrial	HTRA2	2p13.1	yes	yes	yes	4	355	7	yes	yes	Evidence at protein level
NX_O43633	Charged multivesicular body protein 2a	CHMP2A	19q13.43	yes	no	no	1	198	16	yes	yes	Evidence at protein level
NX_O43670	BUB3-interacting and GLEBS motif-containing protein ZNF207	ZNF207	17q11.2	yes	no	no	4	315	5	yes	yes	Evidence at protein level
NX_O43674	NADH dehydrogenase [ubiquinone] 1 beta subcomplex subunit 5, mitochondrial	NDUFB5	3q26.33	yes	no	yes	2	188	0	no	yes	Evidence at protein level
NX_O43684	Mitotic checkpoint protein BUB3	BUB3	10q26.13	yes	yes	no	2	178	11	no	yes	Evidence at protein level
NX_O43747	AP-1 complex subunit gamma-1	AP1G1	16q22.2	yes	no	yes	2	523	3	no	yes	Evidence at protein level
NX_O43924	Retinal rod rhodopsin-sensitive cGMP 3',5'-cyclic phosphodiesterase subunit delta	PDE6D	2q37.1	yes	yes	yes	1	77	1	no	yes	Evidence at protein level
NX_O60220	Mitochondrial import inner membrane translocase subunit Tim8 A	TIMM8A	Xq22.1	yes	yes	no	1	17	11	no	yes	Evidence at protein level
NX_O60264	SWI/SNF-related matrix-associated actin-dependent regulator of chromatin subfamily A member 5	SMARCA5	4q31.21	yes	yes	yes	1	311	34	yes	yes	Evidence at protein level
NX_O60502	Protein O-GlcNAcase	OGA	10q24.32	yes	no	yes	4	540	18	yes	yes	Evidence at protein level
NX_O60506	Heterogeneous nuclear ribonucleoprotein Q	SYNCRIP	6q14.3	yes	no	yes	5	357	27	no	yes	Evidence at protein level
NX_O60641	Clathrin coat assembly protein AP180	SNAP91	6q14.2	yes	no	no	4	781	19	no	yes	Evidence at protein level
NX_O60783	28S ribosomal protein S14, mitochondrial	MRPS14	1q25.1	yes	yes	yes	1	120	0	no	yes	Evidence at protein level
NX_O60784	Target of Myb protein 1	TOM1	22q12.3	yes	no	yes	4	416	33	no	yes	Evidence at protein level
NX_O60812	Heterogeneous nuclear ribonucleoprotein C-like 1	HNRNPCL1	1p36.21	yes	no	no	1	468	5	no	yes	Evidence at protein level
NX_O60884	DnaJ homolog subfamily A member 2	DNAJA2	16q11.2	yes	no	no	1	203	26	no	yes	Evidence at protein level
NX_O75083	WD repeat-containing protein 1	WDR1	4p16.1	yes	no	no	2	474	37	no	yes	Evidence at protein level
NX_O75131	Copine-3	CPNE3	8q21.3	yes	no	no	1	499	15	no	yes	Evidence at protein level
NX_O75347	Tubulin-specific chaperone A	TBCA	5q14.1	yes	no	yes	2	110	8	no	yes	Evidence at protein level
NX_O75367	Core histone macro-H2A.1	H2AFY	5q31.1	yes	yes	yes	3	192	32	no	yes	Evidence at protein level
NX_O75533	Splicing factor 3B subunit 1	SF3B1	2q33.1	yes	yes	yes	2	550	83	yes	yes	Evidence at protein level
NX_O75534	Cold shock domain-containing protein E1	CSDE1	1p13.2	yes	no	yes	4	513	27	no	yes	Evidence at protein level
NX_O75607	Nucleoplasmin-3	NPM3	10q24.32	yes	no	no	1	177	11	no	yes	Evidence at protein level
NX_O75643	U5 small nuclear ribonucleoprotein 200 kDa helicase	SNRNP200	2q11.2	yes	yes	yes	2	878	39	yes	yes	Evidence at protein level
NX_O75694	Nuclear pore complex protein Nup155	NUP155	5p13.2	yes	yes	yes	2	943	22	no	yes	Evidence at protein level
NX_O75794	Cell division cycle protein 123 homolog	CDC123	10p13	yes	no	no	1	237	13	no	yes	Evidence at protein level
NX_O75937	DnaJ homolog subfamily C member 8	DNAJC8	1p35.3	yes	no	no	1	148	8	no	yes	Evidence at protein level
NX_O76003	Glutaredoxin-3	GLRX3	10q26.3	yes	no	yes	1	266	6	yes	yes	Evidence at protein level
NX_O94874	E3 UFM1-protein ligase 1	UFL1	6q16.1	yes	no	no	3	695	9	no	yes	Evidence at protein level
NX_O94906	Pre-mRNA-processing factor 6	PRPF6	20q13.33	yes	yes	yes	2	496	17	yes	yes	Evidence at protein level
NX_O95202	Mitochondrial proton/calcium exchanger protein	LETM1	4p16.3	yes	yes	no	3	534	3	no	yes	Evidence at protein level
NX_O95347	Structural maintenance of chromosomes protein 2	SMC2	9q31.1	yes	no	yes	2	868	13	no	yes	Evidence at protein level
NX_O95433	Activator of 90 kDa heat shock protein ATPase homolog 1	AHSA1	14q24.3	yes	no	yes	2	230	16	yes	yes	Evidence at protein level
NX_O95619	YEATS domain-containing protein 4	YEATS4	12q15	yes	no	yes	1	104	4	no	yes	Evidence at protein level
NX_O95819	Mitogen-activated protein kinase kinase kinase kinase 4	MAP4K4	2q11.2	yes	no	yes	6	754	68	no	yes	Evidence at protein level
NX_O95831	Apoptosis-inducing factor 1, mitochondrial	AIFM1	Xq26.1	yes	yes	yes	6	334	21	yes	yes	Evidence at protein level
NX_O95905	Protein ecdysoneless homolog	ECD	10q22.2	yes	no	no	3	522	15	yes	yes	Evidence at protein level
NX_O96008	Mitochondrial import receptor subunit TOM40 homolog	TOMM40	19q13.32	yes	yes	no	2	249	1	no	yes	Evidence at protein level
NX_P00492	Hypoxanthine-guanine phosphoribosyltransferase	HPRT1	Xq26.2	yes	yes	yes	1	130	12	yes	yes	Evidence at protein level
NX_P00505	Aspartate aminotransferase, mitochondrial	GOT2	16q21	yes	no	yes	2	341	43	no	yes	Evidence at protein level
NX_P00558	Phosphoglycerate kinase 1	PGK1	Xq21.1	yes	yes	yes	2	161	54	no	yes	Evidence at protein level
NX_P00813	Adenosine deaminase	ADA	20q13.12	yes	yes	yes	1	328	21	yes	yes	Evidence at protein level
NX_P01889	HLA class I histocompatibility antigen, B alpha chain	HLA-B	6p21.33	yes	yes	yes	1	614	4	no	yes	Evidence at protein level
NX_P02730	Band 3 anion transport protein	SLC4A1	17q21.31	yes	yes	yes	2	772	17	yes	yes	Evidence at protein level
NX_P02786	Transferrin receptor protein 1	TFRC	3q29	yes	yes	yes	1	547	22	yes	yes	Evidence at protein level
NX_P04075	Fructose-bisphosphate aldolase A	ALDOA	16p11.2	yes	yes	yes	2	346	59	yes	yes	Evidence at protein level
NX_P04083	Annexin A1	ANXA1	9q21.13	yes	no	yes	1	270	35	yes	yes	Evidence at protein level
NX_P04233	HLA class II histocompatibility antigen gamma chain	CD74	5q33.1	yes	yes	yes	3	234	13	no	yes	Evidence at protein level
NX_P04350	Tubulin beta-4A chain	TUBB4A	19p13.3	yes	yes	no	1	286	5	no	yes	Evidence at protein level
NX_P04406	Glyceraldehyde-3-phosphate dehydrogenase	GAPDH	12p13.31	yes	no	yes	2	199	84	yes	yes	Evidence at protein level
NX_P04843	Dolichyl-diphosphooligosaccharide--protein glycosyltransferase subunit 1	RPN1	3q21.3	yes	yes	no	1	466	21	no	yes	Evidence at protein level
NX_P04844	Dolichyl-diphosphooligosaccharide--protein glycosyltransferase subunit 2	RPN2	20q11.23	yes	no	no	2	502	4	no	yes	Evidence at protein level
NX_P04908	Histone H2A type 1-B/E	HIST1H2AB, HIST1H2AE	6p22.2	yes	no	yes	1	227	28	yes	yes	Evidence at protein level
NX_P05091	Aldehyde dehydrogenase, mitochondrial	ALDH2	12q24.12	yes	no	yes	2	419	11	no	yes	Evidence at protein level
NX_P05388	60S acidic ribosomal protein P0	RPLP0	12q24.23	yes	no	yes	2	212	14	no	yes	Evidence at protein level
NX_P06454	Prothymosin alpha	PTMA	2q37.1	yes	no	yes	2	104	17	no	yes	Evidence at protein level
NX_P06576	ATP synthase subunit beta, mitochondrial	ATP5F1B	12q13.3	yes	no	no	1	242	34	no	yes	Evidence at protein level
NX_P06703	Protein S100-A6	S100A6	1q21.3	yes	no	yes	1	69	5	no	yes	Evidence at protein level
NX_P06748	Nucleophosmin	NPM1	5q35.1	yes	yes	yes	3	190	77	yes	yes	Evidence at protein level
NX_P07437	Tubulin beta chain	TUBB	6p21.33	yes	yes	yes	1	84	19	yes	yes	Evidence at protein level
NX_P07814	Bifunctional glutamate/proline--tRNA ligase	EPRS	1q41	yes	yes	yes	1	986	63	yes	yes	Evidence at protein level
NX_P07900	Heat shock protein HSP 90-alpha	HSP90AA1	14q32.31	yes	no	yes	2	677	53	yes	yes	Evidence at protein level
NX_P07910	Heterogeneous nuclear ribonucleoproteins C1/C2	HNRNPC	14q11.2	yes	no	yes	4	154	42	yes	yes	Evidence at protein level
NX_P07919	Cytochrome b-c1 complex subunit 6, mitochondrial	UQCRH	1p33	yes	no	yes	1	75	6	no	yes	Evidence at protein level
NX_P07948	Tyrosine-protein kinase Lyn	LYN	8q12.1	yes	yes	yes	2	237	18	yes	yes	Evidence at protein level
NX_P08243	Asparagine synthetase [glutamine-hydrolyzing]	ASNS	7q21.3	yes	yes	no	3	389	7	yes	yes	Evidence at protein level
NX_P08621	U1 small nuclear ribonucleoprotein 70 kDa	SNRNP70	19q13.33	yes	no	yes	4	363	20	no	yes	Evidence at protein level
NX_P08670	Vimentin	VIM	10p13	yes	yes	yes	1	410	111	yes	yes	Evidence at protein level
NX_P09110	3-ketoacyl-CoA thiolase, peroxisomal	ACAA1	3p22.2	yes	no	yes	2	349	8	no	yes	Evidence at protein level
NX_P09622	Dihydrolipoyl dehydrogenase, mitochondrial	DLD	7q31.1	yes	yes	yes	3	324	36	yes	yes	Evidence at protein level
NX_P09651	Heterogeneous nuclear ribonucleoprotein A1	HNRNPA1	12q13.13	yes	yes	yes	3	245	59	yes	yes	Evidence at protein level
NX_P09668	Pro-cathepsin H	CTSH	15q25.1	yes	yes	yes	1	308	7	no	yes	Evidence at protein level
NX_P09972	Fructose-bisphosphate aldolase C	ALDOC	17q11.2	yes	no	yes	1	252	13	no	yes	Evidence at protein level
NX_P0DI82	Trafficking protein particle complex subunit 2B	TRAPPC2B	19q13.43	yes	no	no	1	116	1	no	yes	Evidence at protein level
NX_P0DP23	Calmodulin-1	CALM1	14q32.11	yes	yes	yes	1	46	13	yes	yes	Evidence at protein level
NX_P10809	60 kDa heat shock protein, mitochondrial	HSPD1	2q33.1	yes	yes	yes	2	334	88	yes	yes	Evidence at protein level
NX_P11021	Endoplasmic reticulum chaperone BiP	HSPA5	9q33.3	yes	yes	yes	1	276	47	yes	yes	Evidence at protein level
NX_P11142	Heat shock cognate 71 kDa protein	HSPA8	11q24.1	yes	no	yes	2	316	61	yes	yes	Evidence at protein level
NX_P11166	Solute carrier family 2, facilitated glucose transporter member 1	SLC2A1	1p34.2	yes	yes	yes	1	393	12	yes	yes	Evidence at protein level
NX_P11310	Medium-chain specific acyl-CoA dehydrogenase, mitochondrial	ACADM	1p31.1	yes	yes	yes	2	405	16	yes	yes	Evidence at protein level
NX_P11388	DNA topoisomerase 2-alpha	TOP2A	17q21.2	yes	yes	yes	4	771	126	yes	yes	Evidence at protein level
NX_P11586	C-1-tetrahydrofolate synthase, cytoplasmic	MTHFD1	14q23.3	yes	yes	yes	1	654	22	yes	yes	Evidence at protein level
NX_P11836	B-lymphocyte antigen CD20	MS4A1	11q12.2	yes	yes	yes	2	267	16	yes	yes	Evidence at protein level
NX_P11940	Polyadenylate-binding protein 1	PABPC1	8q22.3	yes	no	yes	2	362	38	yes	yes	Evidence at protein level
NX_P12004	Proliferating cell nuclear antigen	PCNA	20p12.3	yes	yes	yes	1	138	21	yes	yes	Evidence at protein level
NX_P12081	Histidine--tRNA ligase, cytoplasmic	HARS	5q31.3	yes	yes	yes	4	350	7	yes	yes	Evidence at protein level
NX_P12107	Collagen alpha-1(XI) chain	COL11A1	1p21.1	yes	yes	no	4	1376	11	no	yes	Evidence at protein level
NX_P12235	ADP/ATP translocase 1	SLC25A4	4q35.1	yes	yes	no	1	189	9	yes	yes	Evidence at protein level
NX_P12236	ADP/ATP translocase 3	SLC25A6	Xp22.33	yes	no	no	1	128	11	no	yes	Evidence at protein level
NX_P12268	Inosine-5'-monophosphate dehydrogenase 2	IMPDH2	3p21.31	yes	no	yes	1	303	30	no	yes	Evidence at protein level
NX_P12277	Creatine kinase B-type	CKB	14q32.33	yes	no	yes	1	244	22	yes	yes	Evidence at protein level
NX_P13639	Elongation factor 2	EEF2	19p13.3	yes	yes	yes	1	530	62	yes	yes	Evidence at protein level
NX_P13667	Protein disulfide-isomerase A4	PDIA4	7q36.1	yes	no	yes	1	572	18	no	yes	Evidence at protein level
NX_P13861	cAMP-dependent protein kinase type II-alpha regulatory subunit	PRKAR2A	3p21.31	yes	no	yes	2	291	18	no	yes	Evidence at protein level
NX_P13929	Beta-enolase	ENO3	17p13.2	yes	yes	yes	3	429	11	no	yes	Evidence at protein level
NX_P14618	Pyruvate kinase PKM	PKM	15q23	yes	no	yes	3	436	88	yes	yes	Evidence at protein level
NX_P14678	Small nuclear ribonucleoprotein-associated proteins B and B'	SNRPB	20p13	yes	yes	yes	3	184	11	yes	yes	Evidence at protein level
NX_P14735	Insulin-degrading enzyme	IDE	10q23.33	yes	no	yes	2	697	9	yes	yes	Evidence at protein level
NX_P14866	Heterogeneous nuclear ribonucleoprotein L	HNRNPL	19q13.2	yes	no	yes	2	377	42	yes	yes	Evidence at protein level
NX_P14868	Aspartate--tRNA ligase, cytoplasmic	DARS	2q21.3	yes	yes	yes	2	405	11	no	yes	Evidence at protein level
NX_P15313	V-type proton ATPase subunit B, kidney isoform	ATP6V1B1	2p13.3	yes	yes	no	1	376	0	yes	yes	Evidence at protein level
NX_P15498	Proto-oncogene vav	VAV1	19p13.3	yes	no	yes	2	558	15	yes	yes	Evidence at protein level
NX_P16070	CD44 antigen	CD44	11p13	yes	no	yes	19	642	61	no	yes	Evidence at protein level
NX_P16452	Erythrocyte membrane protein band 4.2	EPB42	15q15.2	yes	yes	no	3	505	3	no	yes	Evidence at protein level
NX_P16949	Stathmin	STMN1	1p36.11	yes	no	no	2	105	22	no	yes	Evidence at protein level
NX_P16989	Y-box-binding protein 3	YBX3	12p13.2	yes	no	no	3	408	27	no	yes	Evidence at protein level
NX_P17174	Aspartate aminotransferase, cytoplasmic	GOT1	10q24.2	yes	no	yes	2	270	8	yes	yes	Evidence at protein level
NX_P17612	cAMP-dependent protein kinase catalytic subunit alpha	PRKACA	19p13.12	yes	yes	yes	2	213	14	yes	yes	Evidence at protein level
NX_P17661	Desmin	DES	2q35	yes	yes	no	1	541	41	yes	yes	Evidence at protein level
NX_P17844	Probable ATP-dependent RNA helicase DDX5	DDX5	17q23.3	yes	no	yes	2	303	45	yes	yes	Evidence at protein level
NX_P17980	26S proteasome regulatory subunit 6A	PSMC3	11p11.2	yes	no	yes	1	208	26	no	yes	Evidence at protein level
NX_P17987	T-complex protein 1 subunit alpha	TCP1	6q25.3	yes	no	yes	1	338	32	no	yes	Evidence at protein level
NX_P18077	60S ribosomal protein L35a	RPL35A	3q29	yes	yes	yes	1	55	7	no	yes	Evidence at protein level
NX_P18754	Regulator of chromosome condensation	RCC1	1p35.3	yes	no	yes	2	302	13	yes	yes	Evidence at protein level
NX_P18858	DNA ligase 1	LIG1	19q13.33	yes	no	yes	3	820	46	no	yes	Evidence at protein level
NX_P19387	DNA-directed RNA polymerase II subunit RPB3	POLR2C	16q21	yes	no	yes	1	141	7	no	yes	Evidence at protein level
NX_P19397	Leukocyte surface antigen CD53	CD53	1p13.3	yes	no	no	1	133	2	no	yes	Evidence at protein level
NX_P19838	Nuclear factor NF-kappa-B p105 subunit	NFKB1	4q24	yes	yes	yes	3	579	31	yes	yes	Evidence at protein level
NX_P20073	Annexin A7	ANXA7	10q22.2	yes	no	no	2	399	6	no	yes	Evidence at protein level
NX_P20674	Cytochrome c oxidase subunit 5A, mitochondrial	COX5A	15q24.2	yes	yes	yes	1	104	7	yes	yes	Evidence at protein level
NX_P22102	Trifunctional purine biosynthetic protein adenosine-3	GART	21q22.11	yes	no	yes	2	753	34	no	yes	Evidence at protein level
NX_P22626	Heterogeneous nuclear ribonucleoproteins A2/B1	HNRNPA2B1	7p15.2	yes	yes	yes	2	214	75	yes	yes	Evidence at protein level
NX_P22695	Cytochrome b-c1 complex subunit 2, mitochondrial	UQCRC2	16p12.2	yes	yes	yes	1	345	14	no	yes	Evidence at protein level
NX_P23193	Transcription elongation factor A protein 1	TCEA1	8q11.23	yes	yes	yes	2	163	17	no	yes	Evidence at protein level
NX_P23284	Peptidyl-prolyl cis-trans isomerase B	PPIB	15q22.31	yes	yes	yes	1	191	14	yes	yes	Evidence at protein level
NX_P23434	Glycine cleavage system H protein, mitochondrial	GCSH	16q23.2	yes	yes	no	1	161	5	no	yes	Evidence at protein level
NX_P23511	Nuclear transcription factor Y subunit alpha	NFYA	6p21.1	yes	no	yes	2	167	4	no	yes	Evidence at protein level
NX_P23526	Adenosylhomocysteinase	AHCY	20q11.22	yes	yes	yes	2	348	12	no	yes	Evidence at protein level
NX_P23921	Ribonucleoside-diphosphate reductase large subunit	RRM1	11p15.4	yes	no	yes	1	347	34	yes	yes	Evidence at protein level
NX_P25098	Beta-adrenergic receptor kinase 1	GRK2	11q13.2	yes	no	yes	1	437	11	yes	yes	Evidence at protein level
NX_P25685	DnaJ homolog subfamily B member 1	DNAJB1	19p13.12	yes	yes	yes	2	338	5	no	yes	Evidence at protein level
NX_P25705	ATP synthase subunit alpha, mitochondrial	ATP5F1A	18q21.1	yes	yes	no	3	357	59	no	yes	Evidence at protein level
NX_P26196	Probable ATP-dependent RNA helicase DDX6	DDX6	11q23.3	yes	yes	yes	1	139	9	yes	yes	Evidence at protein level
NX_P26358	DNA (cytosine-5)-methyltransferase 1	DNMT1	19p13.2	yes	yes	yes	3	967	63	yes	yes	Evidence at protein level
NX_P26368	Splicing factor U2AF 65 kDa subunit	U2AF2	19q13.42	yes	no	yes	2	224	25	yes	yes	Evidence at protein level
NX_P26373	60S ribosomal protein L13	RPL13	16q24.3	yes	no	yes	2	245	21	no	yes	Evidence at protein level
NX_P26599	Polypyrimidine tract-binding protein 1	PTBP1	19p13.3	yes	no	yes	3	487	26	no	yes	Evidence at protein level
NX_P27635	60S ribosomal protein L10	RPL10	Xq28	yes	yes	yes	1	6	8	yes	yes	Evidence at protein level
NX_P27707	Deoxycytidine kinase	DCK	4q13.3	yes	no	yes	1	185	15	yes	yes	Evidence at protein level
NX_P28072	Proteasome subunit beta type-6	PSMB6	17p13.2	yes	no	yes	1	179	5	no	yes	Evidence at protein level
NX_P28074	Proteasome subunit beta type-5	PSMB5	14q11.2	yes	no	yes	3	221	8	yes	yes	Evidence at protein level
NX_P28340	DNA polymerase delta catalytic subunit	POLD1	19q13.33	yes	yes	no	1	1127	26	yes	yes	Evidence at protein level
NX_P29372	DNA-3-methyladenine glycosylase	MPG	16p13.3	yes	no	yes	4	346	7	no	yes	Evidence at protein level
NX_P29466	Caspase-1	CASP1	11q22.3	yes	no	yes	5	370	3	yes	yes	Evidence at protein level
NX_P29692	Elongation factor 1-delta	EEF1D	8q24.3	yes	no	yes	4	671	29	no	yes	Evidence at protein level
NX_P30048	Thioredoxin-dependent peroxide reductase, mitochondrial	PRDX3	10q26.11	yes	no	yes	2	223	16	yes	yes	Evidence at protein level
NX_P30101	Protein disulfide-isomerase A3	PDIA3	15q15.3	yes	no	yes	1	378	29	yes	yes	Evidence at protein level
NX_P30153	Serine/threonine-protein phosphatase 2A 65 kDa regulatory subunit A alpha isoform	PPP2R1A	19q13.41	yes	yes	yes	1	311	19	no	yes	Evidence at protein level
NX_P30837	Aldehyde dehydrogenase X, mitochondrial	ALDH1B1	9p13.1	yes	no	no	1	514	16	no	yes	Evidence at protein level
NX_P31150	Rab GDP dissociation inhibitor alpha	GDI1	Xq28	yes	yes	no	1	156	3	no	yes	Evidence at protein level
NX_P31483	Nucleolysin TIA-1 isoform p40	TIA1	2p13.3	yes	yes	yes	3	269	3	yes	yes	Evidence at protein level
NX_P31689	DnaJ homolog subfamily A member 1	DNAJA1	9p21.1	yes	no	yes	2	217	27	yes	yes	Evidence at protein level
NX_P31937	3-hydroxyisobutyrate dehydrogenase, mitochondrial	HIBADH	7p15.2	yes	no	yes	1	250	21	no	yes	Evidence at protein level
NX_P31939	Bifunctional purine biosynthesis protein PURH	ATIC	2q35	yes	yes	yes	2	514	21	yes	yes	Evidence at protein level
NX_P31942	Heterogeneous nuclear ribonucleoprotein H3	HNRNPH3	10q21.3	yes	no	no	6	192	40	no	yes	Evidence at protein level
NX_P31943	Heterogeneous nuclear ribonucleoprotein H	HNRNPH1	5q35.3	yes	yes	yes	1	181	27	no	yes	Evidence at protein level
NX_P31948	Stress-induced-phosphoprotein 1	STIP1	11q13.1	yes	no	yes	3	438	43	no	yes	Evidence at protein level
NX_P32321	Deoxycytidylate deaminase	DCTD	4q35.1	yes	no	yes	2	174	1	no	yes	Evidence at protein level
NX_P33121	Long-chain-fatty-acid--CoA ligase 1	ACSL1	4q35.1	yes	no	no	3	530	16	no	yes	Evidence at protein level
NX_P33316	Deoxyuridine 5'-triphosphate nucleotidohydrolase, mitochondrial	DUT	15q21.1	yes	no	yes	2	202	13	yes	yes	Evidence at protein level
NX_P33991	DNA replication licensing factor MCM4	MCM4	8q11.21	yes	yes	no	1	799	59	no	yes	Evidence at protein level
NX_P33992	DNA replication licensing factor MCM5	MCM5	22q12.3	yes	yes	no	1	616	18	no	yes	Evidence at protein level
NX_P33993	DNA replication licensing factor MCM7	MCM7	7q22.1	yes	no	no	3	750	37	no	yes	Evidence at protein level
NX_P34897	Serine hydroxymethyltransferase, mitochondrial	SHMT2	12q13.3	yes	no	yes	3	349	24	yes	yes	Evidence at protein level
NX_P34931	Heat shock 70 kDa protein 1-like	HSPA1L	6p21.33	yes	no	yes	1	595	5	yes	yes	Evidence at protein level
NX_P35249	Replication factor C subunit 4	RFC4	3q27.3	yes	no	no	2	345	10	no	yes	Evidence at protein level
NX_P35250	Replication factor C subunit 2	RFC2	7q11.23	yes	yes	no	2	183	10	no	yes	Evidence at protein level
NX_P35579	Myosin-9	MYH9	22q12.3	yes	yes	yes	2	1386	93	yes	yes	Evidence at protein level
NX_P35637	RNA-binding protein FUS	FUS	16p11.2	yes	yes	yes	2	448	50	yes	yes	Evidence at protein level
NX_P35659	Protein DEK	DEK	6p22.3	yes	yes	yes	2	260	39	no	yes	Evidence at protein level
NX_P36404	ADP-ribosylation factor-like protein 2	ARL2	11q13.1	yes	no	yes	2	141	7	yes	yes	Evidence at protein level
NX_P36551	Oxygen-dependent coproporphyrinogen-III oxidase, mitochondrial	CPOX	3q11.2	yes	yes	yes	2	358	4	yes	yes	Evidence at protein level
NX_P36578	60S ribosomal protein L4	RPL4	15q22.31	yes	no	yes	1	323	39	no	yes	Evidence at protein level
NX_P37198	Nuclear pore glycoprotein p62	NUP62	19q13.33	yes	yes	yes	1	504	11	no	yes	Evidence at protein level
NX_P38159	RNA-binding motif protein, X chromosome	RBMX	Xq26.3	yes	yes	yes	3	360	33	yes	yes	Evidence at protein level
NX_P38606	V-type proton ATPase catalytic subunit A	ATP6V1A	3q13.31	yes	yes	no	2	336	11	yes	yes	Evidence at protein level
NX_P38646	Stress-70 protein, mitochondrial	HSPA9	5q31.2	yes	yes	yes	1	491	43	yes	yes	Evidence at protein level
NX_P38919	Eukaryotic initiation factor 4A-III	EIF4A3	17q25.3	yes	yes	yes	1	140	22	yes	yes	Evidence at protein level
NX_P39023	60S ribosomal protein L3	RPL3	22q13.1	yes	no	yes	1	294	25	no	yes	Evidence at protein level
NX_P39748	Flap endonuclease 1	FEN1	11q12.2	yes	no	yes	2	266	29	yes	yes	Evidence at protein level
NX_P40121	Macrophage-capping protein	CAPG	2p11.2	yes	no	yes	2	315	13	no	yes	Evidence at protein level
NX_P40227	T-complex protein 1 subunit zeta	CCT6A	7p11.2	yes	no	yes	2	339	30	no	yes	Evidence at protein level
NX_P40429	60S ribosomal protein L13a	RPL13A	19q13.33	yes	no	yes	1	170	11	yes	yes	Evidence at protein level
NX_P40763	Signal transducer and activator of transcription 3	STAT3	17q21.2	yes	yes	yes	3	422	34	yes	yes	Evidence at protein level
NX_P40938	Replication factor C subunit 3	RFC3	13q13.2	yes	no	no	2	285	7	no	yes	Evidence at protein level
NX_P41219	Peripherin	PRPH	12q13.12	yes	yes	no	2	454	9	no	yes	Evidence at protein level
NX_P41240	Tyrosine-protein kinase CSK	CSK	15q24.1	yes	no	yes	1	234	9	yes	yes	Evidence at protein level
NX_P41250	Glycine--tRNA ligase	GARS	7p14.3	yes	yes	yes	1	526	22	yes	yes	Evidence at protein level
NX_P41252	Isoleucine--tRNA ligase, cytoplasmic	IARS	9q22.31	yes	yes	no	1	940	15	no	yes	Evidence at protein level
NX_P42167	Lamina-associated polypeptide 2, isoforms beta/gamma	TMPO	12q23.1	yes	yes	no	3	394	64	no	yes	Evidence at protein level
NX_P42696	RNA-binding protein 34	RBM34	1q42.3	yes	no	no	2	347	10	no	yes	Evidence at protein level
NX_P42766	60S ribosomal protein L35	RPL35	9q33.3	yes	yes	yes	1	82	8	no	yes	Evidence at protein level
NX_P42768	Wiskott-Aldrich syndrome protein	WAS	Xp11.23	yes	yes	yes	1	251	14	yes	yes	Evidence at protein level
NX_P43007	Neutral amino acid transporter A	SLC1A4	2p14	yes	yes	no	2	410	11	yes	yes	Evidence at protein level
NX_P43246	DNA mismatch repair protein Msh2	MSH2	2p16.3	yes	yes	yes	2	1697	10	yes	yes	Evidence at protein level
NX_P43487	Ran-specific GTPase-activating protein	RANBP1	22q11.21	yes	no	yes	2	114	22	no	yes	Evidence at protein level
NX_P43686	26S proteasome regulatory subunit 6B	PSMC4	19q13.2	yes	no	yes	2	198	18	no	yes	Evidence at protein level
NX_P45880	Voltage-dependent anion-selective channel protein 2	VDAC2	10q22.2	yes	no	no	3	212	18	no	yes	Evidence at protein level
NX_P46060	Ran GTPase-activating protein 1	RANGAP1	22q13.2	yes	no	yes	1	480	25	yes	yes	Evidence at protein level
NX_P46109	Crk-like protein	CRKL	22q11.21	yes	yes	yes	1	180	22	yes	yes	Evidence at protein level
NX_P46776	60S ribosomal protein L27a	RPL27A	11p15.4	yes	no	yes	1	79	10	no	yes	Evidence at protein level
NX_P46777	60S ribosomal protein L5	RPL5	1p22.1	yes	yes	yes	1	224	22	no	yes	Evidence at protein level
NX_P46779	60S ribosomal protein L28	RPL28	19q13.42	yes	no	yes	5	287	13	no	yes	Evidence at protein level
NX_P47756	F-actin-capping protein subunit beta	CAPZB	1p36.13	yes	no	no	2	134	17	no	yes	Evidence at protein level
NX_P48444	Coatomer subunit delta	ARCN1	11q23.3	yes	yes	no	2	226	28	no	yes	Evidence at protein level
NX_P48556	26S proteasome non-ATPase regulatory subunit 8	PSMD8	19q13.2	yes	no	yes	1	336	11	no	yes	Evidence at protein level
NX_P48643	T-complex protein 1 subunit epsilon	CCT5	5p15.2	yes	yes	yes	2	384	35	no	yes	Evidence at protein level
NX_P48736	Phosphatidylinositol 4,5-bisphosphate 3-kinase catalytic subunit gamma isoform	PIK3CG	7q22.3	yes	no	yes	1	1026	4	yes	yes	Evidence at protein level
NX_P49321	Nuclear autoantigenic sperm protein	NASP	1p34.1	yes	no	no	4	602	73	no	yes	Evidence at protein level
NX_P49327	Fatty acid synthase	FASN	17q25.3	yes	no	yes	1	2147	114	no	yes	Evidence at protein level
NX_P49368	T-complex protein 1 subunit gamma	CCT3	1q22	yes	no	yes	2	417	34	no	yes	Evidence at protein level
NX_P49411	Elongation factor Tu, mitochondrial	TUFM	16p11.2	yes	yes	no	1	329	20	no	yes	Evidence at protein level
NX_P49588	Alanine--tRNA ligase, cytoplasmic	AARS	16q22.1	yes	yes	yes	2	841	20	yes	yes	Evidence at protein level
NX_P49591	Serine--tRNA ligase, cytoplasmic	SARS	1p13.3	yes	yes	yes	1	289	8	yes	yes	Evidence at protein level
NX_P49643	DNA primase large subunit	PRIM2	6p11.2	yes	no	yes	2	433	16	no	yes	Evidence at protein level
NX_P49736	DNA replication licensing factor MCM2	MCM2	3q21.3	yes	yes	yes	1	698	35	yes	yes	Evidence at protein level
NX_P49915	GMP synthase [glutamine-hydrolyzing]	GMPS	3q25.31	yes	yes	yes	2	368	18	no	yes	Evidence at protein level
NX_P50395	Rab GDP dissociation inhibitor beta	GDI2	10p15.1	yes	no	no	2	280	19	no	yes	Evidence at protein level
NX_P50440	Glycine amidinotransferase, mitochondrial	GATM	15q21.1	yes	yes	yes	3	276	3	yes	yes	Evidence at protein level
NX_P50502	Hsc70-interacting protein	ST13	22q13.2	yes	no	yes	1	235	8	no	yes	Evidence at protein level
NX_P50552	Vasodilator-stimulated phosphoprotein	VASP	19q13.32	yes	no	yes	1	315	25	yes	yes	Evidence at protein level
NX_P50579	Methionine aminopeptidase 2	METAP2	12q22	yes	no	yes	3	252	14	no	yes	Evidence at protein level
NX_P50990	T-complex protein 1 subunit theta	CCT8	21q21.3	yes	no	yes	3	392	52	no	yes	Evidence at protein level
NX_P50991	T-complex protein 1 subunit delta	CCT4	2p15	yes	no	yes	2	351	32	no	yes	Evidence at protein level
NX_P51149	Ras-related protein Rab-7a	RAB7A	3q21.3	yes	yes	yes	1	92	12	yes	yes	Evidence at protein level
NX_P51532	Transcription activator BRG1	SMARCA4	19p13.2	yes	yes	yes	5	991	53	yes	yes	Evidence at protein level
NX_P51553	Isocitrate dehydrogenase [NAD] subunit gamma, mitochondrial	IDH3G	Xq28	yes	no	yes	2	169	2	yes	yes	Evidence at protein level
NX_P51608	Methyl-CpG-binding protein 2	MECP2	Xq28	yes	yes	yes	2	624	30	yes	yes	Evidence at protein level
NX_P51665	26S proteasome non-ATPase regulatory subunit 7	PSMD7	16q23.1	yes	no	yes	1	195	13	no	yes	Evidence at protein level
NX_P51684	C-C chemokine receptor type 6	CCR6	6q27	yes	yes	no	1	245	3	yes	yes	Evidence at protein level
NX_P51858	Hepatoma-derived growth factor	HDGF	1q23.1	yes	no	yes	3	222	19	yes	yes	Evidence at protein level
NX_P51991	Heterogeneous nuclear ribonucleoprotein A3	HNRNPA3	2q31.2	yes	no	no	2	169	60	no	yes	Evidence at protein level
NX_P52272	Heterogeneous nuclear ribonucleoprotein M	HNRNPM	19p13.2	yes	no	yes	2	636	66	no	yes	Evidence at protein level
NX_P52292	Importin subunit alpha-1	KPNA2	17q24.2	yes	no	yes	1	268	18	no	yes	Evidence at protein level
NX_P52597	Heterogeneous nuclear ribonucleoprotein F	HNRNPF	10q11.21	yes	no	yes	1	233	48	yes	yes	Evidence at protein level
NX_P52701	DNA mismatch repair protein Msh6	MSH6	2p16.3	yes	yes	yes	4	2319	56	yes	yes	Evidence at protein level
NX_P53007	Tricarboxylate transport protein, mitochondrial	SLC25A1	22q11.21	yes	yes	no	1	177	6	yes	yes	Evidence at protein level
NX_P53999	Activated RNA polymerase II transcriptional coactivator p15	SUB1	5p13.3	yes	no	yes	1	63	25	yes	yes	Evidence at protein level
NX_P54577	Tyrosine--tRNA ligase, cytoplasmic	YARS	1p35.1	yes	yes	yes	1	387	17	yes	yes	Evidence at protein level
NX_P54652	Heat shock-related 70 kDa protein 2	HSPA2	14q23.3	yes	no	yes	1	440	9	yes	yes	Evidence at protein level
NX_P54920	Alpha-soluble NSF attachment protein	NAPA	19q13.32	yes	no	no	1	198	8	yes	yes	Evidence at protein level
NX_P55036	26S proteasome non-ATPase regulatory subunit 4	PSMD4	1q21.3	yes	no	yes	2	241	15	no	yes	Evidence at protein level
NX_P55084	Trifunctional enzyme subunit beta, mitochondrial	HADHB	2p23.3	yes	yes	yes	2	389	20	no	yes	Evidence at protein level
NX_P55209	Nucleosome assembly protein 1-like 1	NAP1L1	12q21.2	yes	no	no	3	217	26	no	yes	Evidence at protein level
NX_P55735	Protein SEC13 homolog	SEC13	3p25.3	yes	no	yes	4	281	8	no	yes	Evidence at protein level
NX_P55809	Succinyl-CoA:3-ketoacid coenzyme A transferase 1, mitochondrial	OXCT1	5p13.1	yes	yes	yes	2	248	12	yes	yes	Evidence at protein level
NX_P55957	BH3-interacting domain death agonist	BID	22q11.21	yes	no	yes	4	304	6	no	yes	Evidence at protein level
NX_P56279	T-cell leukemia/lymphoma protein 1A	TCL1A	14q32.13	yes	yes	yes	1	134	0	yes	yes	Evidence at protein level
NX_P57740	Nuclear pore complex protein Nup107	NUP107	12q15	yes	yes	yes	3	586	33	yes	yes	Evidence at protein level
NX_P60842	Eukaryotic initiation factor 4A-I	EIF4A1	17p13.1	yes	no	yes	2	180	30	no	yes	Evidence at protein level
NX_P60981	Destrin	DSTN	20p12.1	yes	no	no	2	81	13	no	yes	Evidence at protein level
NX_P61019	Ras-related protein Rab-2A	RAB2A	8q12.1	yes	no	yes	2	54	6	no	yes	Evidence at protein level
NX_P61158	Actin-related protein 3	ACTR3	2q14.1	yes	no	no	1	171	21	no	yes	Evidence at protein level
NX_P61163	Alpha-centractin	ACTR1A	10q24.32	yes	no	no	1	170	6	no	yes	Evidence at protein level
NX_P61221	ATP-binding cassette sub-family E member 1	ABCE1	4q31.21	yes	no	no	1	192	28	no	yes	Evidence at protein level
NX_P61247	40S ribosomal protein S3a	RPS3A	4q31.3	yes	no	yes	1	116	25	no	yes	Evidence at protein level
NX_P61289	Proteasome activator complex subunit 3	PSME3	17q21.31	yes	no	no	3	143	15	yes	yes	Evidence at protein level
NX_P61599	N-alpha-acetyltransferase 20	NAA20	20p11.23	yes	no	no	2	126	1	no	yes	Evidence at protein level
NX_P61626	Lysozyme C	LYZ	12q15	yes	yes	yes	1	118	5	no	yes	Evidence at protein level
NX_P61923	Coatomer subunit zeta-1	COPZ1	12q13.13	yes	no	yes	5	139	7	yes	yes	Evidence at protein level
NX_P61962	DDB1- and CUL4-associated factor 7	DCAF7	17q23.3	yes	no	no	2	62	4	no	yes	Evidence at protein level
NX_P61978	Heterogeneous nuclear ribonucleoprotein K	HNRNPK	9q21.32	yes	yes	yes	3	229	76	yes	yes	Evidence at protein level
NX_P62070	Ras-related protein R-Ras2	RRAS2	11p15.2	yes	yes	yes	4	90	6	no	yes	Evidence at protein level
NX_P62191	26S proteasome regulatory subunit 4	PSMC1	14q32.11	yes	no	yes	2	123	20	no	yes	Evidence at protein level
NX_P62241	40S ribosomal protein S8	RPS8	1p34.1	yes	no	yes	1	103	16	no	yes	Evidence at protein level
NX_P62249	40S ribosomal protein S16	RPS16	19q13.2	yes	no	yes	1	85	12	no	yes	Evidence at protein level
NX_P62253	Ubiquitin-conjugating enzyme E2 G1	UBE2G1	17p13.2	yes	no	yes	1	65	6	no	yes	Evidence at protein level
NX_P62258	14-3-3 protein epsilon	YWHAE	17p13.3	yes	yes	yes	2	64	31	no	yes	Evidence at protein level
NX_P62266	40S ribosomal protein S23	RPS23	5q14.2	yes	yes	yes	1	32	7	yes	yes	Evidence at protein level
NX_P62277	40S ribosomal protein S13	RPS13	11p15.1	yes	no	yes	1	54	14	no	yes	Evidence at protein level
NX_P62318	Small nuclear ribonucleoprotein Sm D3	SNRPD3	22q11.23	yes	no	yes	2	38	6	no	yes	Evidence at protein level
NX_P62333	26S proteasome regulatory subunit 10B	PSMC6	14q22.1	yes	no	yes	1	163	18	no	yes	Evidence at protein level
NX_P62424	60S ribosomal protein L7a	RPL7A	9q34.2	yes	yes	yes	1	194	23	no	yes	Evidence at protein level
NX_P62491	Ras-related protein Rab-11A	RAB11A	15q22.31	yes	yes	yes	2	84	9	yes	yes	Evidence at protein level
NX_P62699	Protein yippee-like 5	YPEL5	2p23.1	yes	no	no	1	57	3	no	yes	Evidence at protein level
NX_P62750	60S ribosomal protein L23a	RPL23A	17q11.2	yes	no	yes	1	107	10	no	yes	Evidence at protein level
NX_P62753	40S ribosomal protein S6	RPS6	9p22.1	yes	no	yes	1	180	25	yes	yes	Evidence at protein level
NX_P62829	60S ribosomal protein L23	RPL23	17q12	yes	no	yes	1	47	7	no	yes	Evidence at protein level
NX_P62834	Ras-related protein Rap-1A	RAP1A	1p13.2	yes	yes	yes	1	85	2	no	yes	Evidence at protein level
NX_P62837	Ubiquitin-conjugating enzyme E2 D2	UBE2D2	5q31.2	yes	no	yes	2	35	1	yes	yes	Evidence at protein level
NX_P62851	40S ribosomal protein S25	RPS25	11q23.3	yes	no	yes	1	54	15	no	yes	Evidence at protein level
NX_P62854	40S ribosomal protein S26	RPS26	12q13.2	yes	yes	yes	1	36	3	no	yes	Evidence at protein level
NX_P62857	40S ribosomal protein S28	RPS28	19p13.2	yes	yes	yes	1	38	3	no	yes	Evidence at protein level
NX_P62888	60S ribosomal protein L30	RPL30	8q22.2	yes	no	yes	1	41	14	no	yes	Evidence at protein level
NX_P62913	60S ribosomal protein L11	RPL11	1p36.11	yes	yes	yes	2	91	17	no	yes	Evidence at protein level
NX_P62987	Ubiquitin-60S ribosomal protein L40	UBA52	19p13.11	yes	no	yes	1	66	12	yes	yes	Evidence at protein level
NX_P62995	Transformer-2 protein homolog beta	TRA2B	3q27.2	yes	no	yes	3	125	33	no	yes	Evidence at protein level
NX_P63151	Serine/threonine-protein phosphatase 2A 55 kDa regulatory subunit B alpha isoform	PPP2R2A	8p21.2	yes	no	yes	2	198	5	no	yes	Evidence at protein level
NX_P63165	Small ubiquitin-related modifier 1	SUMO1	2q33.1	yes	yes	yes	2	41	22	yes	yes	Evidence at protein level
NX_P63167	Dynein light chain 1, cytoplasmic	DYNLL1	12q24.31	yes	no	yes	1	33	9	yes	yes	Evidence at protein level
NX_P63172	Dynein light chain Tctex-type 1	DYNLT1	6q25.3	yes	no	yes	1	110	2	no	yes	Evidence at protein level
NX_P67809	Y-box-binding protein 1	YBX1	1p34.2	yes	no	yes	1	253	28	yes	yes	Evidence at protein level
NX_P68363	Tubulin alpha-1B chain	TUBA1B	12q13.12	yes	no	yes	2	78	11	no	yes	Evidence at protein level
NX_P68371	Tubulin beta-4B chain	TUBB4B	9q34.3	yes	yes	no	1	152	7	yes	yes	Evidence at protein level
NX_P78371	T-complex protein 1 subunit beta	CCT2	12q15	yes	no	yes	2	336	35	no	yes	Evidence at protein level
NX_P78527	DNA-dependent protein kinase catalytic subunit	PRKDC	8q11.21	yes	yes	yes	2	3099	183	yes	yes	Evidence at protein level
NX_P80217	Interferon-induced 35 kDa protein	IFI35	17q21.31	yes	no	no	2	271	1	no	yes	Evidence at protein level
NX_P81277	Prolactin-releasing peptide	PRLH	2q37.3	no	no	no	1	111	1	yes	yes	Evidence at protein level
NX_P82664	28S ribosomal protein S10, mitochondrial	MRPS10	6p21.1	yes	no	yes	1	176	0	no	yes	Evidence at protein level
NX_P82675	28S ribosomal protein S5, mitochondrial	MRPS5	2q11.1	yes	no	yes	2	408	1	no	yes	Evidence at protein level
NX_P83881	60S ribosomal protein L36a	RPL36A	Xq22.1	yes	no	yes	1	22	0	no	yes	Evidence at protein level
NX_P98175	RNA-binding protein 10	RBM10	Xp11.3	yes	yes	yes	5	261	39	no	yes	Evidence at protein level
NX_Q00325	Phosphate carrier protein, mitochondrial	SLC25A3	12q23.1	yes	yes	no	2	296	19	no	yes	Evidence at protein level
NX_Q00610	Clathrin heavy chain 1	CLTC	17q23.1	yes	yes	yes	2	621	55	yes	yes	Evidence at protein level
NX_Q00688	Peptidyl-prolyl cis-trans isomerase FKBP3	FKBP3	14q21.2	yes	no	yes	1	194	13	no	yes	Evidence at protein level
NX_Q01085	Nucleolysin TIAR	TIAL1	10q26.11	yes	no	yes	2	157	5	no	yes	Evidence at protein level
NX_Q01105	Protein SET	SET	9q34.11	yes	yes	yes	4	193	20	no	yes	Evidence at protein level
NX_Q01130	Serine/arginine-rich splicing factor 2	SRSF2	17q25.1	yes	yes	yes	2	151	24	no	yes	Evidence at protein level
NX_Q01469	Fatty acid-binding protein 5	FABP5	8q21.13	yes	no	yes	1	108	11	yes	yes	Evidence at protein level
NX_Q02556	Interferon regulatory factor 8	IRF8	16q24.1	yes	yes	no	1	309	3	yes	yes	Evidence at protein level
NX_Q02880	DNA topoisomerase 2-beta	TOP2B	3p24.2	yes	yes	yes	2	952	103	yes	yes	Evidence at protein level
NX_Q03001	Dystonin	DST	6p12.1	yes	yes	yes	9	6873	79	yes	yes	Evidence at protein level
NX_Q04864	Proto-oncogene c-Rel	REL	2p16.1	yes	no	no	2	436	6	no	yes	Evidence at protein level
NX_Q04917	14-3-3 protein eta	YWHAH	22q12.3	yes	no	yes	1	111	9	no	yes	Evidence at protein level
NX_Q05519	Serine/arginine-rich splicing factor 11	SRSF11	1p31.1	yes	no	no	2	316	30	no	yes	Evidence at protein level
NX_Q07020	60S ribosomal protein L18	RPL18	19q13.33	yes	yes	yes	2	102	14	no	yes	Evidence at protein level
NX_Q07666	KH domain-containing, RNA-binding, signal transduction-associated protein 1	KHDRBS1	1p35.2	yes	no	yes	3	283	57	yes	yes	Evidence at protein level
NX_Q08170	Serine/arginine-rich splicing factor 4	SRSF4	1p35.3	yes	no	no	1	369	17	no	yes	Evidence at protein level
NX_Q08752	Peptidyl-prolyl cis-trans isomerase D	PPID	4q32.1	yes	no	no	1	301	10	yes	yes	Evidence at protein level
NX_Q09028	Histone-binding protein RBBP4	RBBP4	1p35.1	yes	no	yes	4	123	17	no	yes	Evidence at protein level
NX_Q12769	Nuclear pore complex protein Nup160	NUP160	11p11.2	yes	yes	yes	3	1168	15	no	yes	Evidence at protein level
NX_Q12800	Alpha-globin transcription factor CP2	TFCP2	12q13.12	yes	no	no	4	276	6	yes	yes	Evidence at protein level
NX_Q12824	SWI/SNF-related matrix-associated actin-dependent regulator of chromatin subfamily B member 1	SMARCB1	22q11.23	yes	yes	yes	2	206	10	yes	yes	Evidence at protein level
NX_Q12874	Splicing factor 3A subunit 3	SF3A3	1p34.3	yes	no	yes	1	176	17	yes	yes	Evidence at protein level
NX_Q12931	Heat shock protein 75 kDa, mitochondrial	TRAP1	16p13.3	yes	no	yes	2	857	24	no	yes	Evidence at protein level
NX_Q12965	Unconventional myosin-Ie	MYO1E	15q22.2	yes	yes	no	1	933	20	yes	yes	Evidence at protein level
NX_Q13112	Chromatin assembly factor 1 subunit B	CHAF1B	21q22.12	yes	no	no	1	378	35	no	yes	Evidence at protein level
NX_Q13151	Heterogeneous nuclear ribonucleoprotein A0	HNRNPA0	5q31.2	yes	no	no	1	187	41	no	yes	Evidence at protein level
NX_Q13153	Serine/threonine-protein kinase PAK 1	PAK1	11q13.5	yes	yes	yes	2	282	32	yes	yes	Evidence at protein level
NX_Q13177	Serine/threonine-protein kinase PAK 2	PAK2	3q29	yes	no	yes	1	277	34	yes	yes	Evidence at protein level
NX_Q13185	Chromobox protein homolog 3	CBX3	7p15.2	yes	no	yes	1	107	28	no	yes	Evidence at protein level
NX_Q13243	Serine/arginine-rich splicing factor 5	SRSF5	14q24.1	yes	no	no	3	206	11	no	yes	Evidence at protein level
NX_Q13247	Serine/arginine-rich splicing factor 6	SRSF6	20q13.11	yes	no	no	3	304	20	yes	yes	Evidence at protein level
NX_Q13283	Ras GTPase-activating protein-binding protein 1	G3BP1	5q33.1	yes	no	yes	2	350	45	yes	yes	Evidence at protein level
NX_Q13356	RING-type E3 ubiquitin-protein ligase PPIL2	PPIL2	22q11.21	yes	no	yes	2	438	9	yes	yes	Evidence at protein level
NX_Q13363	C-terminal-binding protein 1	CTBP1	4p16.3	yes	yes	yes	2	281	7	yes	yes	Evidence at protein level
NX_Q13422	DNA-binding protein Ikaros	IKZF1	7p12.2	yes	yes	yes	8	392	42	yes	yes	Evidence at protein level
NX_Q13451	Peptidyl-prolyl cis-trans isomerase FKBP5	FKBP5	6p21.31	yes	no	yes	2	335	12	no	yes	Evidence at protein level
NX_Q13509	Tubulin beta-3 chain	TUBB3	16q24.3	yes	yes	yes	2	247	9	yes	yes	Evidence at protein level
NX_Q13561	Dynactin subunit 2	DCTN2	12q13.3	yes	no	no	3	279	20	no	yes	Evidence at protein level
NX_Q13596	Sorting nexin-1	SNX1	15q22.31	yes	no	yes	3	450	18	yes	yes	Evidence at protein level
NX_Q13618	Cullin-3	CUL3	2q36.2	yes	yes	yes	3	374	13	no	yes	Evidence at protein level
NX_Q13620	Cullin-4B	CUL4B	Xq24	yes	yes	yes	3	374	40	yes	yes	Evidence at protein level
NX_Q13765	Nascent polypeptide-associated complex subunit alpha	NACA	12q13.3	yes	yes	yes	1	89	10	no	yes	Evidence at protein level
NX_Q13822	Ectonucleotide pyrophosphatase/phosphodiesterase family member 2	ENPP2	8q24.12	yes	yes	yes	3	794	20	yes	yes	Evidence at protein level
NX_Q13885	Tubulin beta-2A chain	TUBB2A	6p25.2	yes	yes	no	1	110	10	yes	yes	Evidence at protein level
NX_Q14011	Cold-inducible RNA-binding protein	CIRBP	19p13.3	yes	no	yes	3	326	13	no	yes	Evidence at protein level
NX_Q14019	Coactosin-like protein	COTL1	16q24.1	yes	no	yes	1	167	4	yes	yes	Evidence at protein level
NX_Q14103	Heterogeneous nuclear ribonucleoprotein D0	HNRNPD	4q21.22	yes	no	yes	4	213	47	no	yes	Evidence at protein level
NX_Q14155	Rho guanine nucleotide exchange factor 7	ARHGEF7	13q34	yes	no	yes	6	606	29	no	yes	Evidence at protein level
NX_Q14161	ARF GTPase-activating protein GIT2	GIT2	12q24.11	yes	no	no	11	495	47	no	yes	Evidence at protein level
NX_Q14204	Cytoplasmic dynein 1 heavy chain 1	DYNC1H1	14q32.31	yes	yes	yes	1	1983	36	yes	yes	Evidence at protein level
NX_Q14331	Protein FRG1	FRG1	4q35.2	yes	yes	no	1	287	2	no	yes	Evidence at protein level
NX_Q14498	RNA-binding protein 39	RBM39	20q11.22	yes	no	yes	3	221	30	no	yes	Evidence at protein level
NX_Q14566	DNA replication licensing factor MCM6	MCM6	2q21.3	yes	yes	yes	1	607	33	yes	yes	Evidence at protein level
NX_Q14568	Heat shock protein HSP 90-alpha A2	HSP90AA2P	11p14.1	yes	no	no	1	2	2	no	no	Evidence at protein level
NX_Q14696	LRP chaperone MESD	MESD	15q25.1	yes	no	no	2	269	3	no	yes	Evidence at protein level
NX_Q14739	Delta(14)-sterol reductase LBR	LBR	1q42.12	yes	yes	yes	1	533	27	yes	yes	Evidence at protein level
NX_Q14847	LIM and SH3 domain protein 1	LASP1	17q12	yes	no	yes	3	199	28	no	yes	Evidence at protein level
NX_Q15003	Condensin complex subunit 2	NCAPH	2q11.2	yes	yes	yes	2	569	44	yes	yes	Evidence at protein level
NX_Q15019	Septin-2	SEPTIN2	2q37.3	yes	no	yes	3	260	14	yes	yes	Evidence at protein level
NX_Q15021	Condensin complex subunit 1	NCAPD2	12p13.31	yes	yes	no	1	1151	36	yes	yes	Evidence at protein level
NX_Q15054	DNA polymerase delta subunit 3	POLD3	11q13.4	yes	no	yes	3	361	19	yes	yes	Evidence at protein level
NX_Q15056	Eukaryotic translation initiation factor 4H	EIF4H	7q11.23	yes	yes	no	2	110	30	no	yes	Evidence at protein level
NX_Q15084	Protein disulfide-isomerase A6	PDIA6	2p25.1	yes	no	yes	5	430	14	yes	yes	Evidence at protein level
NX_Q15126	Phosphomevalonate kinase	PMVK	1q21.3	yes	yes	yes	1	148	3	yes	yes	Evidence at protein level
NX_Q15181	Inorganic pyrophosphatase	PPA1	10q22.1	yes	no	yes	1	215	16	no	yes	Evidence at protein level
NX_Q15233	Non-POU domain-containing octamer-binding protein	NONO	Xq13.1	yes	yes	yes	2	213	51	yes	yes	Evidence at protein level
NX_Q15365	Poly(rC)-binding protein 1	PCBP1	2p13.3	yes	no	yes	1	167	33	no	yes	Evidence at protein level
NX_Q15366	Poly(rC)-binding protein 2	PCBP2	12q13.13	yes	no	yes	8	142	33	no	yes	Evidence at protein level
NX_Q15370	Elongin-B	ELOB	16p13.3	yes	no	yes	2	132	7	no	yes	Evidence at protein level
NX_Q15428	Splicing factor 3A subunit 2	SF3A2	19p13.3	yes	no	yes	1	331	9	no	yes	Evidence at protein level
NX_Q15435	Protein phosphatase 1 regulatory subunit 7	PPP1R7	2q37.3	yes	no	yes	5	253	18	yes	yes	Evidence at protein level
NX_Q15554	Telomeric repeat-binding factor 2	TERF2	16q22.1	yes	no	yes	2	359	15	no	yes	Evidence at protein level
NX_Q15555	Microtubule-associated protein RP/EB family member 2	MAPRE2	18q12.1	yes	yes	no	5	184	15	yes	yes	Evidence at protein level
NX_Q15691	Microtubule-associated protein RP/EB family member 1	MAPRE1	20q11.21	yes	no	yes	1	146	19	yes	yes	Evidence at protein level
NX_Q15717	ELAV-like protein 1	ELAVL1	19p13.2	yes	no	yes	2	163	23	yes	yes	Evidence at protein level
NX_Q15785	Mitochondrial import receptor subunit TOM34	TOMM34	20q13.12	yes	no	no	1	177	9	no	yes	Evidence at protein level
NX_Q15910	Histone-lysine N-methyltransferase EZH2	EZH2	7q36.1	yes	yes	yes	5	565	24	yes	yes	Evidence at protein level
NX_Q16352	Alpha-internexin	INA	10q24.33	yes	no	no	1	391	8	no	yes	Evidence at protein level
NX_Q16543	Hsp90 co-chaperone Cdc37	CDC37	19p13.2	yes	no	yes	1	291	21	no	yes	Evidence at protein level
NX_Q16555	Dihydropyrimidinase-related protein 2	DPYSL2	8p21.2	yes	no	yes	2	281	26	yes	yes	Evidence at protein level
NX_Q16560	U11/U12 small nuclear ribonucleoprotein 35 kDa protein	SNRNP35	12q24.31	yes	no	no	2	195	1	no	yes	Evidence at protein level
NX_Q16629	Serine/arginine-rich splicing factor 7	SRSF7	2p22.1	yes	no	yes	4	126	19	yes	yes	Evidence at protein level
NX_Q16630	Cleavage and polyadenylation specificity factor subunit 6	CPSF6	12q15	yes	no	yes	3	268	15	yes	yes	Evidence at protein level
NX_Q16822	Phosphoenolpyruvate carboxykinase [GTP], mitochondrial	PCK2	14q11.2	yes	yes	no	3	666	6	no	yes	Evidence at protein level
NX_Q16851	UTP--glucose-1-phosphate uridylyltransferase	UGP2	2p15	yes	no	yes	2	319	15	yes	yes	Evidence at protein level
NX_Q2VIR3	Eukaryotic translation initiation factor 2 subunit 3B	EIF2S3B	12p13.2	yes	no	no	2	420	5	no	yes	Evidence at protein level
NX_Q32P51	Heterogeneous nuclear ribonucleoprotein A1-like 2	HNRNPA1L2	13q14.3	yes	no	no	1	242	13	no	yes	Evidence at protein level
NX_Q3MHD2	Protein LSM12 homolog	LSM12	17q21.31	yes	no	no	2	83	8	no	yes	Evidence at protein level
NX_Q58FF7	Putative heat shock protein HSP 90-beta-3	HSP90AB3P	4q22.1	yes	no	no	1	0	2	no	no	Uncertain
NX_Q5JTV8	Torsin-1A-interacting protein 1	TOR1AIP1	1q25.2	yes	yes	yes	3	545	45	no	yes	Evidence at protein level
NX_Q5T1C6	Acyl-coenzyme A thioesterase THEM4	THEM4	1q21.3	yes	no	yes	1	194	7	yes	yes	Evidence at protein level
NX_Q5T8P6	RNA-binding protein 26	RBM26	13q31.1	yes	no	no	6	665	20	no	yes	Evidence at protein level
NX_Q5TBB1	Ribonuclease H2 subunit B	RNASEH2B	13q14.3	yes	yes	yes	2	272	4	yes	yes	Evidence at protein level
NX_Q5TEJ8	Protein THEMIS2	THEMIS2	1p35.3	yes	no	no	6	513	3	no	yes	Evidence at protein level
NX_Q5VYK3	Proteasome adapter and scaffold protein ECM29	ECPAS	9q31.3	yes	no	no	1	1	21	no	yes	Evidence at protein level
NX_Q5XPI4	E3 ubiquitin-protein ligase RNF123	RNF123	3p21.31	yes	no	yes	2	1065	12	no	yes	Evidence at protein level
NX_Q6DN03	Putative histone H2B type 2-C	HIST2H2BC	1q21.2	yes	no	no	1	0	47	no	no	Uncertain
NX_Q6IBS0	Twinfilin-2	TWF2	3p21.2	yes	no	yes	1	253	5	no	yes	Evidence at protein level
NX_Q6NXE6	Armadillo repeat-containing protein 6	ARMC6	19p13.11	yes	no	no	2	446	12	no	yes	Evidence at protein level
NX_Q6P1L8	39S ribosomal protein L14, mitochondrial	MRPL14	6p21.1	yes	no	yes	1	137	1	no	yes	Evidence at protein level
NX_Q6P5R6	60S ribosomal protein L22-like 1	RPL22L1	3q26.2	yes	no	no	1	97	5	no	yes	Evidence at protein level
NX_Q6PL24	Protein TMED8	TMED8	14q24.3	yes	no	no	1	266	14	no	yes	Evidence at protein level
NX_Q6UN15	Pre-mRNA 3'-end-processing factor FIP1	FIP1L1	4q12	yes	yes	no	4	361	29	no	yes	Evidence at protein level
NX_Q6ZMR3	L-lactate dehydrogenase A-like 6A	LDHAL6A	11p15.1	yes	no	no	1	290	15	no	yes	Evidence at protein level
NX_Q71U36	Tubulin alpha-1A chain	TUBA1A	12q13.12	yes	yes	yes	2	135	5	no	yes	Evidence at protein level
NX_Q71UM5	40S ribosomal protein S27-like	RPS27L	15q22.2	yes	no	no	1	56	0	no	yes	Evidence at protein level
NX_Q7L2H7	Eukaryotic translation initiation factor 3 subunit M	EIF3M	11p13	yes	no	yes	2	254	18	yes	yes	Evidence at protein level
NX_Q7L513	Fc receptor-like A	FCRLA	1q23.3	yes	no	yes	15	378	2	no	yes	Evidence at protein level
NX_Q7L576	Cytoplasmic FMR1-interacting protein 1	CYFIP1	15q11.2	yes	no	yes	3	909	8	yes	yes	Evidence at protein level
NX_Q7L591	Docking protein 3	DOK3	5q35.3	yes	no	no	4	626	16	no	yes	Evidence at protein level
NX_Q7L5N1	COP9 signalosome complex subunit 6	COPS6	7q22.1	yes	no	yes	1	186	8	no	yes	Evidence at protein level
NX_Q7Z3B4	Nucleoporin p54	NUP54	4q21.1	yes	no	yes	3	291	3	no	yes	Evidence at protein level
NX_Q7Z4H3	HD domain-containing protein 2	HDDC2	6q22.31	yes	no	yes	3	202	5	no	yes	Evidence at protein level
NX_Q7Z7H8	39S ribosomal protein L10, mitochondrial	MRPL10	17q21.32	yes	no	yes	2	249	0	no	yes	Evidence at protein level
NX_Q86SX6	Glutaredoxin-related protein 5, mitochondrial	GLRX5	14q32.13	yes	yes	yes	1	151	3	yes	yes	Evidence at protein level
NX_Q86SZ2	Trafficking protein particle complex subunit 6B	TRAPPC6B	14q21.1	yes	yes	yes	2	138	2	yes	yes	Evidence at protein level
NX_Q86UX7	Fermitin family homolog 3	FERMT3	11q13.1	yes	yes	yes	2	556	12	yes	yes	Evidence at protein level
NX_Q86VP6	Cullin-associated NEDD8-dissociated protein 1	CAND1	12q14.3	yes	no	yes	3	582	29	no	yes	Evidence at protein level
NX_Q86YP4	Transcriptional repressor p66-alpha	GATAD2A	19p13.11	yes	no	yes	3	538	71	yes	yes	Evidence at protein level
NX_Q8IUI4	Putative protein SNX29P2	SNX29P2	16p11.2	yes	no	no	1	11	0	no	no	Uncertain
NX_Q8IUI8	Cytokine receptor-like factor 3	CRLF3	17q11.2	yes	no	no	2	301	1	no	yes	Evidence at protein level
NX_Q8IY67	Ribonucleoprotein PTB-binding 1	RAVER1	19p13.2	yes	no	yes	3	716	49	no	yes	Evidence at protein level
NX_Q8IZ07	Ankyrin repeat domain-containing protein 13A	ANKRD13A	12q24.11	yes	no	no	1	395	13	yes	yes	Evidence at protein level
NX_Q8IZQ5	Selenoprotein H	SELENOH	11q12.1	yes	no	no	1	142	5	no	yes	Evidence at protein level
NX_Q8N5K1	CDGSH iron-sulfur domain-containing protein 2	CISD2	4q24	yes	yes	yes	1	78	5	yes	yes	Evidence at protein level
NX_Q8N983	39S ribosomal protein L43, mitochondrial	MRPL43	10q24.31	yes	no	yes	6	296	0	no	yes	Evidence at protein level
NX_Q8NBJ7	Inactive C-alpha-formylglycine-generating enzyme 2	SUMF2	7p11.2	yes	no	yes	5	420	2	yes	yes	Evidence at protein level
NX_Q8NC51	Plasminogen activator inhibitor 1 RNA-binding protein	SERBP1	1p31.3	yes	no	yes	4	288	72	yes	yes	Evidence at protein level
NX_Q8NFH5	Nucleoporin NUP35	NUP35	2q32.1	yes	no	yes	3	243	46	no	yes	Evidence at protein level
NX_Q8NFZ5	TNFAIP3-interacting protein 2	TNIP2	4p16.3	yes	no	yes	2	396	4	yes	yes	Evidence at protein level
NX_Q8NHW5	60S acidic ribosomal protein P0-like	RPLP0P6	2p22.1	yes	no	no	1	0	6	no	no	Uncertain
NX_Q8TAT6	Nuclear protein localization protein 4 homolog	NPLOC4	17q25.3	yes	no	no	2	430	19	yes	yes	Evidence at protein level
NX_Q8TBC4	NEDD8-activating enzyme E1 catalytic subunit	UBA3	3p14.1	yes	no	yes	2	333	12	yes	yes	Evidence at protein level
NX_Q8TCC7	Solute carrier family 22 member 8	SLC22A8	11q12.3	yes	no	no	5	466	3	yes	yes	Evidence at protein level
NX_Q8TDD1	ATP-dependent RNA helicase DDX54	DDX54	12q24.13	yes	no	no	2	886	19	no	yes	Evidence at protein level
NX_Q8TEA8	D-aminoacyl-tRNA deacylase 1	DTD1	20p11.23	yes	no	yes	1	118	5	no	yes	Evidence at protein level
NX_Q8WU39	Marginal zone B- and B1-cell-specific protein	MZB1	5q31.2	yes	no	no	5	293	3	yes	yes	Evidence at protein level
NX_Q8WU79	Stromal membrane-associated protein 2	SMAP2	1p34.2	yes	no	yes	3	293	17	no	yes	Evidence at protein level
NX_Q8WWY3	U4/U6 small nuclear ribonucleoprotein Prp31	PRPF31	19q13.42	yes	yes	yes	4	408	25	yes	yes	Evidence at protein level
NX_Q8WXF1	Paraspeckle component 1	PSPC1	13q12.11	yes	no	yes	2	434	12	yes	yes	Evidence at protein level
NX_Q8WXX5	DnaJ homolog subfamily C member 9	DNAJC9	10q22.2	yes	no	no	1	238	4	no	yes	Evidence at protein level
NX_Q8WZ60	Kelch-like protein 6	KLHL6	3q27.1	yes	no	no	1	564	3	no	yes	Evidence at protein level
NX_Q92499	ATP-dependent RNA helicase DDX1	DDX1	2p24.3	yes	no	yes	3	494	17	yes	yes	Evidence at protein level
NX_Q92506	Estradiol 17-beta-dehydrogenase 8	HSD17B8	6p21.32	yes	no	yes	1	227	4	yes	yes	Evidence at protein level
NX_Q92526	T-complex protein 1 subunit zeta-2	CCT6B	17q12	yes	no	no	3	451	1	no	yes	Evidence at protein level
NX_Q92616	eIF-2-alpha kinase activator GCN1	GCN1	12q24.23	yes	no	no	1	1782	28	no	yes	Evidence at protein level
NX_Q92619	Rho GTPase-activating protein 45	ARHGAP45	19p13.3	yes	no	yes	2	1101	45	no	yes	Evidence at protein level
NX_Q92665	28S ribosomal protein S31, mitochondrial	MRPS31	13q14.11	yes	no	yes	1	344	1	no	yes	Evidence at protein level
NX_Q92688	Acidic leucine-rich nuclear phosphoprotein 32 family member B	ANP32B	9q22.33	yes	no	yes	2	167	7	no	yes	Evidence at protein level
NX_Q92797	Symplekin	SYMPK	19q13.32	yes	no	yes	2	1002	40	yes	yes	Evidence at protein level
NX_Q92843	Bcl-2-like protein 2	BCL2L2	14q11.2	yes	no	yes	2	135	2	no	yes	Evidence at protein level
NX_Q92890	Ubiquitin recognition factor in ER-associated degradation protein 1	UFD1	22q11.21	yes	yes	yes	3	156	19	no	yes	Evidence at protein level
NX_Q92945	Far upstream element-binding protein 2	KHSRP	19p13.3	yes	no	yes	1	443	40	no	yes	Evidence at protein level
NX_Q92973	Transportin-1	TNPO1	5q13.2	yes	no	yes	3	429	6	yes	yes	Evidence at protein level
NX_Q93084	Sarcoplasmic/endoplasmic reticulum calcium ATPase 3	ATP2A3	17p13.2	yes	no	no	7	890	22	no	yes	Evidence at protein level
NX_Q96A72	Protein mago nashi homolog 2	MAGOHB	12p13.2	yes	no	yes	1	88	1	no	yes	Evidence at protein level
NX_Q96AE4	Far upstream element-binding protein 1	FUBP1	1p31.1	yes	no	yes	2	437	38	no	yes	Evidence at protein level
NX_Q96BP3	Peptidylprolyl isomerase domain and WD repeat-containing protein 1	PPWD1	5q12.3	yes	no	yes	2	471	4	no	yes	Evidence at protein level
NX_Q96BY6	Dedicator of cytokinesis protein 10	DOCK10	2q36.2	yes	no	no	3	1714	34	no	yes	Evidence at protein level
NX_Q96D96	Voltage-gated hydrogen channel 1	HVCN1	12q24.11	yes	no	yes	4	210	5	yes	yes	Evidence at protein level
NX_Q96DE0	U8 snoRNA-decapping enzyme	NUDT16	3q22.1	yes	no	yes	4	264	0	no	yes	Evidence at protein level
NX_Q96DI7	U5 small nuclear ribonucleoprotein 40 kDa protein	SNRNP40	1p35.2	yes	no	yes	2	221	6	no	yes	Evidence at protein level
NX_Q96DV4	39S ribosomal protein L38, mitochondrial	MRPL38	17q25.1	yes	no	yes	2	363	2	no	yes	Evidence at protein level
NX_Q96EP5	DAZ-associated protein 1	DAZAP1	19p13.3	yes	no	yes	2	265	13	no	yes	Evidence at protein level
NX_Q96F07	Cytoplasmic FMR1-interacting protein 2	CYFIP2	5q33.3	yes	yes	no	2	575	10	no	yes	Evidence at protein level
NX_Q96FI4	Endonuclease 8-like 1	NEIL1	15q24.2	yes	no	yes	1	404	1	yes	yes	Evidence at protein level
NX_Q96FJ0	AMSH-like protease	STAMBPL1	10q23.31	yes	no	yes	2	406	10	yes	yes	Evidence at protein level
NX_Q96FN9	D-aminoacyl-tRNA deacylase 2	DTD2	14q12	yes	no	no	1	131	0	no	yes	Evidence at protein level
NX_Q96GC5	39S ribosomal protein L48, mitochondrial	MRPL48	11q13.4	yes	no	yes	2	150	2	no	yes	Evidence at protein level
NX_Q96J01	THO complex subunit 3	THOC3	5q35.2	yes	no	no	2	263	8	no	yes	Evidence at protein level
NX_Q96KP4	Cytosolic non-specific dipeptidase	CNDP2	18q22.3	yes	no	yes	2	449	8	no	yes	Evidence at protein level
NX_Q96N67	Dedicator of cytokinesis protein 7	DOCK7	1p31.3	yes	yes	yes	7	1447	60	no	yes	Evidence at protein level
NX_Q96NC0	Zinc finger matrin-type protein 2	ZMAT2	5q31.3	yes	no	yes	1	82	15	no	yes	Evidence at protein level
NX_Q99504	Eyes absent homolog 3	EYA3	1p35.3	yes	no	no	5	320	18	yes	yes	Evidence at protein level
NX_Q99538	Legumain	LGMN	14q32.12	yes	no	yes	3	350	7	yes	yes	Evidence at protein level
NX_Q99729	Heterogeneous nuclear ribonucleoprotein A/B	HNRNPAB	5q35.3	yes	no	yes	4	246	36	no	yes	Evidence at protein level
NX_Q99873	Protein arginine N-methyltransferase 1	PRMT1	19q13.33	yes	no	yes	4	173	16	yes	yes	Evidence at protein level
NX_Q99986	Serine/threonine-protein kinase VRK1	VRK1	14q32.2	yes	yes	yes	1	263	20	yes	yes	Evidence at protein level
NX_Q9BPW8	Protein NipSnap homolog 1	NIPSNAP1	22q12.2	yes	no	no	1	172	19	no	yes	Evidence at protein level
NX_Q9BPX3	Condensin complex subunit 3	NCAPG	4p15.31	yes	no	yes	1	655	26	no	yes	Evidence at protein level
NX_Q9BPZ7	Target of rapamycin complex 2 subunit MAPKAP1	MAPKAP1	9q33.3	yes	no	yes	6	316	10	no	yes	Evidence at protein level
NX_Q9BQ67	Glutamate-rich WD repeat-containing protein 1	GRWD1	19q13.33	yes	no	no	1	466	15	no	yes	Evidence at protein level
NX_Q9BRX5	DNA replication complex GINS protein PSF3	GINS3	16q21	yes	no	yes	3	204	3	no	yes	Evidence at protein level
NX_Q9BSH5	Haloacid dehalogenase-like hydrolase domain-containing protein 3	HDHD3	9q32	yes	no	yes	1	220	3	no	yes	Evidence at protein level
NX_Q9BSJ8	Extended synaptotagmin-1	ESYT1	12q13.2	yes	no	no	2	881	39	yes	yes	Evidence at protein level
NX_Q9BTT0	Acidic leucine-rich nuclear phosphoprotein 32 family member E	ANP32E	1q21.2	yes	no	yes	3	126	14	yes	yes	Evidence at protein level
NX_Q9BV20	Methylthioribose-1-phosphate isomerase	MRI1	19p13.13	yes	no	yes	2	367	4	yes	yes	Evidence at protein level
NX_Q9BV86	N-terminal Xaa-Pro-Lys N-methyltransferase 1	NTMT1	9q34.11	yes	no	yes	2	213	6	yes	yes	Evidence at protein level
NX_Q9BVM4	Gamma-glutamylaminecyclotransferase	GGACT	13q32.3	yes	no	yes	1	151	0	yes	yes	Evidence at protein level
NX_Q9BW83	Intraflagellar transport protein 27 homolog	IFT27	22q12.3	yes	yes	no	2	148	2	yes	yes	Evidence at protein level
NX_Q9BY77	Polymerase delta-interacting protein 3	POLDIP3	22q13.2	yes	no	no	2	367	36	yes	yes	Evidence at protein level
NX_Q9BYD3	39S ribosomal protein L4, mitochondrial	MRPL4	19p13.2	yes	no	yes	2	316	4	no	yes	Evidence at protein level
NX_Q9BYX7	Putative beta-actin-like protein 3	POTEKP	2q21.1	yes	no	no	1	0	3	no	yes	Uncertain
NX_Q9BZQ8	Protein Niban 1	NIBAN1	1q25.3	yes	no	no	1	827	36	no	yes	Evidence at protein level
NX_Q9BZV1	UBX domain-containing protein 6	UBXN6	19p13.3	yes	no	no	2	482	11	no	yes	Evidence at protein level
NX_Q9C0B1	Alpha-ketoglutarate-dependent dioxygenase FTO	FTO	16q12.2	yes	yes	yes	4	436	17	yes	yes	Evidence at protein level
NX_Q9C0J8	pre-mRNA 3' end processing protein WDR33	WDR33	2q14.3	yes	no	yes	3	989	39	no	yes	Evidence at protein level
NX_Q9GZR7	ATP-dependent RNA helicase DDX24	DDX24	14q32.12	yes	no	no	2	713	25	no	yes	Evidence at protein level
NX_Q9GZU8	PSME3-interacting protein	FAM192A	16q13	yes	no	no	1	186	8	yes	yes	Evidence at protein level
NX_Q9GZZ1	N-alpha-acetyltransferase 50	NAA50	3q13.31	yes	no	yes	2	79	9	yes	yes	Evidence at protein level
NX_Q9H0A0	RNA cytidine acetyltransferase	NAT10	11p13	yes	no	no	2	823	16	yes	yes	Evidence at protein level
NX_Q9H0D6	5'-3' exoribonuclease 2	XRN2	20p11.22	yes	no	no	2	607	49	no	yes	Evidence at protein level
NX_Q9H0E2	Toll-interacting protein	TOLLIP	11p15.5	yes	no	yes	2	229	8	no	yes	Evidence at protein level
NX_Q9H223	EH domain-containing protein 4	EHD4	15q15.1	yes	no	no	1	464	10	no	yes	Evidence at protein level
NX_Q9H2H8	Peptidyl-prolyl cis-trans isomerase-like 3	PPIL3	2q33.1	yes	no	yes	2	150	3	no	yes	Evidence at protein level
NX_Q9H2M9	Rab3 GTPase-activating protein non-catalytic subunit	RAB3GAP2	1q41	yes	yes	no	2	1018	18	no	yes	Evidence at protein level
NX_Q9H3S4	Thiamin pyrophosphokinase 1	TPK1	7q35	yes	yes	yes	2	262	0	no	yes	Evidence at protein level
NX_Q9H492	Microtubule-associated proteins 1A/1B light chain 3A	MAP1LC3A	20q11.22	yes	no	yes	2	100	2	yes	yes	Evidence at protein level
NX_Q9H4A6	Golgi phosphoprotein 3	GOLPH3	5p13.3	yes	no	yes	1	204	5	yes	yes	Evidence at protein level
NX_Q9H6Z4	Ran-binding protein 3	RANBP3	19p13.3	yes	no	yes	3	405	48	no	yes	Evidence at protein level
NX_Q9H9B4	Sideroflexin-1	SFXN1	5q35.2	yes	no	no	1	272	4	no	yes	Evidence at protein level
NX_Q9HAV4	Exportin-5	XPO5	6p21.1	yes	no	yes	1	676	11	no	yes	Evidence at protein level
NX_Q9HAV7	GrpE protein homolog 1, mitochondrial	GRPEL1	4p16.1	yes	no	no	1	160	6	no	yes	Evidence at protein level
NX_Q9HBI0	Gamma-parvin	PARVG	22q13.31	yes	no	no	5	305	2	no	yes	Evidence at protein level
NX_Q9HCD5	Nuclear receptor coactivator 5	NCOA5	20q13.12	yes	no	yes	1	480	23	yes	yes	Evidence at protein level
NX_Q9NP77	RNA polymerase II subunit A C-terminal domain phosphatase SSU72	SSU72	1p36.33	yes	no	yes	2	154	6	yes	yes	Evidence at protein level
NX_Q9NP79	Vacuolar protein sorting-associated protein VTA1 homolog	VTA1	6q24.1	yes	no	yes	2	299	5	no	yes	Evidence at protein level
NX_Q9NP81	Serine--tRNA ligase, mitochondrial	SARS2	19q13.2	yes	yes	no	2	535	5	no	yes	Evidence at protein level
NX_Q9NR30	Nucleolar RNA helicase 2	DDX21	10q22.1	yes	no	yes	2	427	24	yes	yes	Evidence at protein level
NX_Q9NR31	GTP-binding protein SAR1a	SAR1A	10q22.1	yes	no	yes	2	101	4	no	yes	Evidence at protein level
NX_Q9NR45	Sialic acid synthase	NANS	9q22.33	yes	yes	yes	1	311	12	no	yes	Evidence at protein level
NX_Q9NRG0	Chromatin accessibility complex protein 1	CHRAC1	8q24.3	yes	no	no	1	109	4	no	yes	Evidence at protein level
NX_Q9NRY5	Protein FAM114A2	FAM114A2	5q33.2	yes	no	no	1	454	9	no	yes	Evidence at protein level
NX_Q9NTI5	Sister chromatid cohesion protein PDS5 homolog B	PDS5B	13q13.1	yes	no	yes	5	766	47	no	yes	Evidence at protein level
NX_Q9NTJ3	Structural maintenance of chromosomes protein 4	SMC4	3q25.33	yes	no	yes	2	1026	31	no	yes	Evidence at protein level
NX_Q9NTK5	Obg-like ATPase 1	OLA1	2q31.1	yes	no	yes	3	232	6	yes	yes	Evidence at protein level
NX_Q9NVA2	Septin-11	SEPTIN11	4q21.1	yes	yes	no	2	274	5	yes	yes	Evidence at protein level
NX_Q9NVI1	Fanconi anemia group I protein	FANCI	15q26.1	yes	yes	no	4	1208	37	yes	yes	Evidence at protein level
NX_Q9NVI7	ATPase family AAA domain-containing protein 3A	ATAD3A	1p36.33	yes	yes	no	3	646	5	yes	yes	Evidence at protein level
NX_Q9NVP2	Histone chaperone ASF1B	ASF1B	19p13.12	yes	no	yes	1	148	5	yes	yes	Evidence at protein level
NX_Q9NW64	Pre-mRNA-splicing factor RBM22	RBM22	5q33.1	yes	no	yes	2	182	16	yes	yes	Evidence at protein level
NX_Q9NX07	tRNA selenocysteine 1-associated protein 1	TRNAU1AP	1p35.3	yes	no	yes	2	189	4	no	yes	Evidence at protein level
NX_Q9NYL9	Tropomodulin-3	TMOD3	15q21.2	yes	no	no	1	275	13	no	yes	Evidence at protein level
NX_Q9NZI7	Upstream-binding protein 1	UBP1	3p22.3	yes	no	no	2	284	4	no	yes	Evidence at protein level
NX_Q9NZI8	Insulin-like growth factor 2 mRNA-binding protein 1	IGF2BP1	17q21.32	yes	no	yes	2	333	19	yes	yes	Evidence at protein level
NX_Q9P0J0	NADH dehydrogenase [ubiquinone] 1 alpha subcomplex subunit 13	NDUFA13	19p13.11	yes	yes	yes	2	175	5	yes	yes	Evidence at protein level
NX_Q9P0S3	ORM1-like protein 1	ORMDL1	2q32.2	yes	no	no	1	99	0	no	yes	Evidence at protein level
NX_Q9P258	Protein RCC2	RCC2	1p36.13	yes	no	yes	1	318	21	yes	yes	Evidence at protein level
NX_Q9P287	BRCA2 and CDKN1A-interacting protein	BCCIP	10q26.2	yes	no	no	4	327	12	no	yes	Evidence at protein level
NX_Q9UBB4	Ataxin-10	ATXN10	22q13.31	yes	yes	no	2	416	14	no	yes	Evidence at protein level
NX_Q9UBE0	SUMO-activating enzyme subunit 1	SAE1	19q13.32	yes	no	yes	3	325	11	yes	yes	Evidence at protein level
NX_Q9UBQ7	Glyoxylate reductase/hydroxypyruvate reductase	GRHPR	9p13.2	yes	yes	yes	2	421	6	no	yes	Evidence at protein level
NX_Q9UBY0	Sodium/hydrogen exchanger 2	SLC9A2	2q12.1	yes	no	no	1	644	7	no	yes	Evidence at protein level
NX_Q9UHD1	Cysteine and histidine-rich domain-containing protein 1	CHORDC1	11q14.3	yes	no	yes	2	203	11	no	yes	Evidence at protein level
NX_Q9UHX1	Poly(U)-binding-splicing factor PUF60	PUF60	8q24.3	yes	yes	yes	6	258	26	yes	yes	Evidence at protein level
NX_Q9UHY1	Nuclear receptor-binding protein	NRBP1	2p23.3	yes	no	no	1	242	21	no	yes	Evidence at protein level
NX_Q9UI08	Ena/VASP-like protein	EVL	14q32.2	yes	no	no	5	332	34	no	yes	Evidence at protein level
NX_Q9UII2	ATPase inhibitor, mitochondrial	ATP5IF1	1p35.3	yes	no	no	3	117	4	no	yes	Evidence at protein level
NX_Q9UJY4	ADP-ribosylation factor-binding protein GGA2	GGA2	16p12.2	yes	no	yes	1	542	11	yes	yes	Evidence at protein level
NX_Q9UJZ1	Stomatin-like protein 2, mitochondrial	STOML2	9p13.3	yes	no	no	2	231	16	no	yes	Evidence at protein level
NX_Q9UKM9	RNA-binding protein Raly	RALY	20q11.22	yes	no	yes	2	293	36	no	yes	Evidence at protein level
NX_Q9UKT9	Zinc finger protein Aiolos	IKZF3	17q12	yes	yes	no	16	341	12	no	yes	Evidence at protein level
NX_Q9UL25	Ras-related protein Rab-21	RAB21	12q21.1	yes	no	yes	1	153	8	yes	yes	Evidence at protein level
NX_Q9ULZ2	Signal-transducing adaptor protein 1	STAP1	4q13.2	yes	yes	yes	1	270	2	no	yes	Evidence at protein level
NX_Q9UMS4	Pre-mRNA-processing factor 19	PRPF19	11q12.2	yes	no	yes	1	247	8	yes	yes	Evidence at protein level
NX_Q9UNH7	Sorting nexin-6	SNX6	14q13.1	yes	no	no	2	250	13	yes	yes	Evidence at protein level
NX_Q9UNM6	26S proteasome non-ATPase regulatory subunit 13	PSMD13	11p15.5	yes	no	yes	2	264	13	no	yes	Evidence at protein level
NX_Q9UQ80	Proliferation-associated protein 2G4	PA2G4	12q13.2	yes	no	yes	2	115	21	yes	yes	Evidence at protein level
NX_Q9Y228	TRAF3-interacting JNK-activating modulator	TRAF3IP3	1q32.2	yes	no	no	3	454	3	no	yes	Evidence at protein level
NX_Q9Y230	RuvB-like 2	RUVBL2	19q13.33	yes	no	yes	2	264	28	yes	yes	Evidence at protein level
NX_Q9Y262	Eukaryotic translation initiation factor 3 subunit L	EIF3L	22q13.1	yes	no	yes	2	343	17	no	yes	Evidence at protein level
NX_Q9Y265	RuvB-like 1	RUVBL1	3q21.3	yes	no	yes	2	187	10	yes	yes	Evidence at protein level
NX_Q9Y281	Cofilin-2	CFL2	14q13.1	yes	yes	no	2	100	7	yes	yes	Evidence at protein level
NX_Q9Y2R0	Cytochrome c oxidase assembly factor 3 homolog, mitochondrial	COA3	17q21.2	yes	yes	no	1	115	2	no	yes	Evidence at protein level
NX_Q9Y314	Nitric oxide synthase-interacting protein	NOSIP	19q13.33	yes	no	no	1	242	22	no	yes	Evidence at protein level
NX_Q9Y316	Protein MEMO1	MEMO1	2p22.3	yes	no	yes	3	155	7	yes	yes	Evidence at protein level
NX_Q9Y376	Calcium-binding protein 39	CAB39	2q37.1	yes	no	yes	1	156	1	yes	yes	Evidence at protein level
NX_Q9Y3C6	Peptidyl-prolyl cis-trans isomerase-like 1	PPIL1	6p21.2	yes	no	yes	1	119	4	no	yes	Evidence at protein level
NX_Q9Y3D3	28S ribosomal protein S16, mitochondrial	MRPS16	10q22.2	yes	yes	yes	2	145	4	no	yes	Evidence at protein level
NX_Q9Y3F4	Serine-threonine kinase receptor-associated protein	STRAP	12p12.3	yes	no	no	2	214	13	no	yes	Evidence at protein level
NX_Q9Y3Z3	Deoxynucleoside triphosphate triphosphohydrolase SAMHD1	SAMHD1	20q11.23	yes	yes	yes	3	437	30	yes	yes	Evidence at protein level
NX_Q9Y5B9	FACT complex subunit SPT16	SUPT16H	14q11.2	yes	no	yes	1	357	40	no	yes	Evidence at protein level
NX_Q9Y5K5	Ubiquitin carboxyl-terminal hydrolase isozyme L5	UCHL5	1q31.2	yes	no	yes	4	191	13	yes	yes	Evidence at protein level
NX_Q9Y5M8	Signal recognition particle receptor subunit beta	SRPRB	3q22.1	yes	no	no	1	231	12	no	yes	Evidence at protein level
NX_Q9Y696	Chloride intracellular channel protein 4	CLIC4	1p36.11	yes	no	yes	1	177	18	no	yes	Evidence at protein level
NX_Q9Y6C9	Mitochondrial carrier homolog 2	MTCH2	11p11.2	yes	no	no	1	234	8	no	yes	Evidence at protein level

## Sheet: PE1
acc. code	protein name	gene name(s)	chromosome	proteomics	disease	structure	#isof.	#variants	#PTMS	mutagenesis	tissue expr.	PE
NX_A6NHR9	Structural maintenance of chromosomes flexible hinge domain-containing protein 1	SMCHD1	18p11.32	yes	yes	no	3	1340	22	yes	yes	Evidence at protein level
NX_O00154	Cytosolic acyl coenzyme A thioester hydrolase	ACOT7	1p36.31	yes	no	yes	7	395	8	no	yes	Evidence at protein level
NX_O00221	NF-kappa-B inhibitor epsilon	NFKBIE	6p21.1	yes	no	no	1	440	8	yes	yes	Evidence at protein level
NX_O00231	26S proteasome non-ATPase regulatory subunit 11	PSMD11	17q11.2	yes	no	yes	2	173	14	yes	yes	Evidence at protein level
NX_O00232	26S proteasome non-ATPase regulatory subunit 12	PSMD12	17q24.2	yes	yes	yes	2	285	16	no	yes	Evidence at protein level
NX_O00303	Eukaryotic translation initiation factor 3 subunit F	EIF3F	11p15.4	yes	yes	yes	1	326	12	yes	yes	Evidence at protein level
NX_O00422	Histone deacetylase complex subunit SAP18	SAP18	13q12.11	yes	no	yes	2	125	5	yes	yes	Evidence at protein level
NX_O00425	Insulin-like growth factor 2 mRNA-binding protein 3	IGF2BP3	7p15.3	yes	no	yes	2	377	16	yes	yes	Evidence at protein level
NX_O00487	26S proteasome non-ATPase regulatory subunit 14	PSMD14	2q24.2	yes	no	yes	1	73	8	yes	yes	Evidence at protein level
NX_O00541	Pescadillo homolog	PES1	22q12.2	yes	no	yes	2	486	13	yes	yes	Evidence at protein level
NX_O00762	Ubiquitin-conjugating enzyme E2 C	UBE2C	20q13.12	yes	no	yes	4	179	5	yes	yes	Evidence at protein level
NX_O00764	Pyridoxal kinase	PDXK	21q22.3	yes	no	yes	3	199	9	no	yes	Evidence at protein level
NX_O14556	Glyceraldehyde-3-phosphate dehydrogenase, testis-specific	GAPDHS	19q13.12	yes	no	yes	1	376	2	no	yes	Evidence at protein level
NX_O14929	Histone acetyltransferase type B catalytic subunit	HAT1	2q31.1	yes	no	yes	2	274	9	yes	yes	Evidence at protein level
NX_O14980	Exportin-1	XPO1	2p15	yes	yes	yes	1	386	28	yes	yes	Evidence at protein level
NX_O15042	U2 snRNP-associated SURP motif-containing protein	U2SURP	3q23	yes	no	no	3	541	46	no	yes	Evidence at protein level
NX_O15160	DNA-directed RNA polymerases I and III subunit RPAC1	POLR1C	6p21.1	yes	yes	no	2	406	7	yes	yes	Evidence at protein level
NX_O15269	Serine palmitoyltransferase 1	SPTLC1	9q22.31	yes	yes	no	2	342	5	yes	yes	Evidence at protein level
NX_O15392	Baculoviral IAP repeat-containing protein 5	BIRC5	17q25.3	yes	no	yes	7	155	12	yes	yes	Evidence at protein level
NX_O15533	Tapasin	TAPBP	6p21.32	yes	yes	yes	4	419	6	yes	yes	Evidence at protein level
NX_O43143	Pre-mRNA-splicing factor ATP-dependent RNA helicase DHX15	DHX15	4p15.2	yes	no	yes	1	270	16	no	yes	Evidence at protein level
NX_O43175	D-3-phosphoglycerate dehydrogenase	PHGDH	1p12	yes	yes	yes	1	458	26	yes	yes	Evidence at protein level
NX_O43242	26S proteasome non-ATPase regulatory subunit 3	PSMD3	17q21.1	yes	no	yes	2	365	18	no	yes	Evidence at protein level
NX_O43252	Bifunctional 3'-phosphoadenosine 5'-phosphosulfate synthase 1	PAPSS1	4q25	yes	no	yes	1	389	7	yes	yes	Evidence at protein level
NX_O43390	Heterogeneous nuclear ribonucleoprotein R	HNRNPR	1p36.12	yes	no	yes	4	327	19	no	yes	Evidence at protein level
NX_O43395	U4/U6 small nuclear ribonucleoprotein Prp3	PRPF3	1q21.2	yes	yes	yes	2	264	19	yes	yes	Evidence at protein level
NX_O43464	Serine protease HTRA2, mitochondrial	HTRA2	2p13.1	yes	yes	yes	4	355	7	yes	yes	Evidence at protein level
NX_O43633	Charged multivesicular body protein 2a	CHMP2A	19q13.43	yes	no	no	1	198	16	yes	yes	Evidence at protein level
NX_O43670	BUB3-interacting and GLEBS motif-containing protein ZNF207	ZNF207	17q11.2	yes	no	no	4	315	5	yes	yes	Evidence at protein level
NX_O43674	NADH dehydrogenase [ubiquinone] 1 beta subcomplex subunit 5, mitochondrial	NDUFB5	3q26.33	yes	no	yes	2	188	0	no	yes	Evidence at protein level
NX_O43684	Mitotic checkpoint protein BUB3	BUB3	10q26.13	yes	yes	no	2	178	11	no	yes	Evidence at protein level
NX_O43747	AP-1 complex subunit gamma-1	AP1G1	16q22.2	yes	no	yes	2	523	3	no	yes	Evidence at protein level
NX_O43924	Retinal rod rhodopsin-sensitive cGMP 3',5'-cyclic phosphodiesterase subunit delta	PDE6D	2q37.1	yes	yes	yes	1	77	1	no	yes	Evidence at protein level
NX_O60220	Mitochondrial import inner membrane translocase subunit Tim8 A	TIMM8A	Xq22.1	yes	yes	no	1	17	11	no	yes	Evidence at protein level
NX_O60264	SWI/SNF-related matrix-associated actin-dependent regulator of chromatin subfamily A member 5	SMARCA5	4q31.21	yes	yes	yes	1	311	34	yes	yes	Evidence at protein level
NX_O60502	Protein O-GlcNAcase	OGA	10q24.32	yes	no	yes	4	540	18	yes	yes	Evidence at protein level
NX_O60506	Heterogeneous nuclear ribonucleoprotein Q	SYNCRIP	6q14.3	yes	no	yes	5	357	27	no	yes	Evidence at protein level
NX_O60641	Clathrin coat assembly protein AP180	SNAP91	6q14.2	yes	no	no	4	781	19	no	yes	Evidence at protein level
NX_O60783	28S ribosomal protein S14, mitochondrial	MRPS14	1q25.1	yes	yes	yes	1	120	0	no	yes	Evidence at protein level
NX_O60784	Target of Myb protein 1	TOM1	22q12.3	yes	no	yes	4	416	33	no	yes	Evidence at protein level
NX_O60812	Heterogeneous nuclear ribonucleoprotein C-like 1	HNRNPCL1	1p36.21	yes	no	no	1	468	5	no	yes	Evidence at protein level
NX_O60884	DnaJ homolog subfamily A member 2	DNAJA2	16q11.2	yes	no	no	1	203	26	no	yes	Evidence at protein level
NX_O75083	WD repeat-containing protein 1	WDR1	4p16.1	yes	no	no	2	474	37	no	yes	Evidence at protein level
NX_O75131	Copine-3	CPNE3	8q21.3	yes	no	no	1	499	15	no	yes	Evidence at protein level
NX_O75347	Tubulin-specific chaperone A	TBCA	5q14.1	yes	no	yes	2	110	8	no	yes	Evidence at protein level
NX_O75367	Core histone macro-H2A.1	H2AFY	5q31.1	yes	yes	yes	3	192	32	no	yes	Evidence at protein level
NX_O75533	Splicing factor 3B subunit 1	SF3B1	2q33.1	yes	yes	yes	2	550	83	yes	yes	Evidence at protein level
NX_O75534	Cold shock domain-containing protein E1	CSDE1	1p13.2	yes	no	yes	4	513	27	no	yes	Evidence at protein level
NX_O75607	Nucleoplasmin-3	NPM3	10q24.32	yes	no	no	1	177	11	no	yes	Evidence at protein level
NX_O75643	U5 small nuclear ribonucleoprotein 200 kDa helicase	SNRNP200	2q11.2	yes	yes	yes	2	878	39	yes	yes	Evidence at protein level
NX_O75694	Nuclear pore complex protein Nup155	NUP155	5p13.2	yes	yes	yes	2	943	22	no	yes	Evidence at protein level
NX_O75794	Cell division cycle protein 123 homolog	CDC123	10p13	yes	no	no	1	237	13	no	yes	Evidence at protein level
NX_O75937	DnaJ homolog subfamily C member 8	DNAJC8	1p35.3	yes	no	no	1	148	8	no	yes	Evidence at protein level
NX_O76003	Glutaredoxin-3	GLRX3	10q26.3	yes	no	yes	1	266	6	yes	yes	Evidence at protein level
NX_O94874	E3 UFM1-protein ligase 1	UFL1	6q16.1	yes	no	no	3	695	9	no	yes	Evidence at protein level
NX_O94906	Pre-mRNA-processing factor 6	PRPF6	20q13.33	yes	yes	yes	2	496	17	yes	yes	Evidence at protein level
NX_O95202	Mitochondrial proton/calcium exchanger protein	LETM1	4p16.3	yes	yes	no	3	534	3	no	yes	Evidence at protein level
NX_O95347	Structural maintenance of chromosomes protein 2	SMC2	9q31.1	yes	no	yes	2	868	13	no	yes	Evidence at protein level
NX_O95433	Activator of 90 kDa heat shock protein ATPase homolog 1	AHSA1	14q24.3	yes	no	yes	2	230	16	yes	yes	Evidence at protein level
NX_O95619	YEATS domain-containing protein 4	YEATS4	12q15	yes	no	yes	1	104	4	no	yes	Evidence at protein level
NX_O95819	Mitogen-activated protein kinase kinase kinase kinase 4	MAP4K4	2q11.2	yes	no	yes	6	754	68	no	yes	Evidence at protein level
NX_O95831	Apoptosis-inducing factor 1, mitochondrial	AIFM1	Xq26.1	yes	yes	yes	6	334	21	yes	yes	Evidence at protein level
NX_O95905	Protein ecdysoneless homolog	ECD	10q22.2	yes	no	no	3	522	15	yes	yes	Evidence at protein level
NX_O96008	Mitochondrial import receptor subunit TOM40 homolog	TOMM40	19q13.32	yes	yes	no	2	249	1	no	yes	Evidence at protein level
NX_P00492	Hypoxanthine-guanine phosphoribosyltransferase	HPRT1	Xq26.2	yes	yes	yes	1	130	12	yes	yes	Evidence at protein level
NX_P00505	Aspartate aminotransferase, mitochondrial	GOT2	16q21	yes	no	yes	2	341	43	no	yes	Evidence at protein level
NX_P00558	Phosphoglycerate kinase 1	PGK1	Xq21.1	yes	yes	yes	2	161	54	no	yes	Evidence at protein level
NX_P00813	Adenosine deaminase	ADA	20q13.12	yes	yes	yes	1	328	21	yes	yes	Evidence at protein level
NX_P01889	HLA class I histocompatibility antigen, B alpha chain	HLA-B	6p21.33	yes	yes	yes	1	614	4	no	yes	Evidence at protein level
NX_P02730	Band 3 anion transport protein	SLC4A1	17q21.31	yes	yes	yes	2	772	17	yes	yes	Evidence at protein level
NX_P02786	Transferrin receptor protein 1	TFRC	3q29	yes	yes	yes	1	547	22	yes	yes	Evidence at protein level
NX_P04075	Fructose-bisphosphate aldolase A	ALDOA	16p11.2	yes	yes	yes	2	346	59	yes	yes	Evidence at protein level
NX_P04083	Annexin A1	ANXA1	9q21.13	yes	no	yes	1	270	35	yes	yes	Evidence at protein level
NX_P04233	HLA class II histocompatibility antigen gamma chain	CD74	5q33.1	yes	yes	yes	3	234	13	no	yes	Evidence at protein level
NX_P04350	Tubulin beta-4A chain	TUBB4A	19p13.3	yes	yes	no	1	286	5	no	yes	Evidence at protein level
NX_P04406	Glyceraldehyde-3-phosphate dehydrogenase	GAPDH	12p13.31	yes	no	yes	2	199	84	yes	yes	Evidence at protein level
NX_P04843	Dolichyl-diphosphooligosaccharide--protein glycosyltransferase subunit 1	RPN1	3q21.3	yes	yes	no	1	466	21	no	yes	Evidence at protein level
NX_P04844	Dolichyl-diphosphooligosaccharide--protein glycosyltransferase subunit 2	RPN2	20q11.23	yes	no	no	2	502	4	no	yes	Evidence at protein level
NX_P04908	Histone H2A type 1-B/E	HIST1H2AB, HIST1H2AE	6p22.2	yes	no	yes	1	227	28	yes	yes	Evidence at protein level
NX_P05091	Aldehyde dehydrogenase, mitochondrial	ALDH2	12q24.12	yes	no	yes	2	419	11	no	yes	Evidence at protein level
NX_P05388	60S acidic ribosomal protein P0	RPLP0	12q24.23	yes	no	yes	2	212	14	no	yes	Evidence at protein level
NX_P06454	Prothymosin alpha	PTMA	2q37.1	yes	no	yes	2	104	17	no	yes	Evidence at protein level
NX_P06576	ATP synthase subunit beta, mitochondrial	ATP5F1B	12q13.3	yes	no	no	1	242	34	no	yes	Evidence at protein level
NX_P06703	Protein S100-A6	S100A6	1q21.3	yes	no	yes	1	69	5	no	yes	Evidence at protein level
NX_P06748	Nucleophosmin	NPM1	5q35.1	yes	yes	yes	3	190	77	yes	yes	Evidence at protein level
NX_P07437	Tubulin beta chain	TUBB	6p21.33	yes	yes	yes	1	84	19	yes	yes	Evidence at protein level
NX_P07814	Bifunctional glutamate/proline--tRNA ligase	EPRS	1q41	yes	yes	yes	1	986	63	yes	yes	Evidence at protein level
NX_P07900	Heat shock protein HSP 90-alpha	HSP90AA1	14q32.31	yes	no	yes	2	677	53	yes	yes	Evidence at protein level
NX_P07910	Heterogeneous nuclear ribonucleoproteins C1/C2	HNRNPC	14q11.2	yes	no	yes	4	154	42	yes	yes	Evidence at protein level
NX_P07919	Cytochrome b-c1 complex subunit 6, mitochondrial	UQCRH	1p33	yes	no	yes	1	75	6	no	yes	Evidence at protein level
NX_P07948	Tyrosine-protein kinase Lyn	LYN	8q12.1	yes	yes	yes	2	237	18	yes	yes	Evidence at protein level
NX_P08243	Asparagine synthetase [glutamine-hydrolyzing]	ASNS	7q21.3	yes	yes	no	3	389	7	yes	yes	Evidence at protein level
NX_P08621	U1 small nuclear ribonucleoprotein 70 kDa	SNRNP70	19q13.33	yes	no	yes	4	363	20	no	yes	Evidence at protein level
NX_P08670	Vimentin	VIM	10p13	yes	yes	yes	1	410	111	yes	yes	Evidence at protein level
NX_P09110	3-ketoacyl-CoA thiolase, peroxisomal	ACAA1	3p22.2	yes	no	yes	2	349	8	no	yes	Evidence at protein level
NX_P09622	Dihydrolipoyl dehydrogenase, mitochondrial	DLD	7q31.1	yes	yes	yes	3	324	36	yes	yes	Evidence at protein level
NX_P09651	Heterogeneous nuclear ribonucleoprotein A1	HNRNPA1	12q13.13	yes	yes	yes	3	245	59	yes	yes	Evidence at protein level
NX_P09668	Pro-cathepsin H	CTSH	15q25.1	yes	yes	yes	1	308	7	no	yes	Evidence at protein level
NX_P09972	Fructose-bisphosphate aldolase C	ALDOC	17q11.2	yes	no	yes	1	252	13	no	yes	Evidence at protein level
NX_P0DI82	Trafficking protein particle complex subunit 2B	TRAPPC2B	19q13.43	yes	no	no	1	116	1	no	yes	Evidence at protein level
NX_P0DP23	Calmodulin-1	CALM1	14q32.11	yes	yes	yes	1	46	13	yes	yes	Evidence at protein level
NX_P10809	60 kDa heat shock protein, mitochondrial	HSPD1	2q33.1	yes	yes	yes	2	334	88	yes	yes	Evidence at protein level
NX_P11021	Endoplasmic reticulum chaperone BiP	HSPA5	9q33.3	yes	yes	yes	1	276	47	yes	yes	Evidence at protein level
NX_P11142	Heat shock cognate 71 kDa protein	HSPA8	11q24.1	yes	no	yes	2	316	61	yes	yes	Evidence at protein level
NX_P11166	Solute carrier family 2, facilitated glucose transporter member 1	SLC2A1	1p34.2	yes	yes	yes	1	393	12	yes	yes	Evidence at protein level
NX_P11310	Medium-chain specific acyl-CoA dehydrogenase, mitochondrial	ACADM	1p31.1	yes	yes	yes	2	405	16	yes	yes	Evidence at protein level
NX_P11388	DNA topoisomerase 2-alpha	TOP2A	17q21.2	yes	yes	yes	4	771	126	yes	yes	Evidence at protein level
NX_P11586	C-1-tetrahydrofolate synthase, cytoplasmic	MTHFD1	14q23.3	yes	yes	yes	1	654	22	yes	yes	Evidence at protein level
NX_P11836	B-lymphocyte antigen CD20	MS4A1	11q12.2	yes	yes	yes	2	267	16	yes	yes	Evidence at protein level
NX_P11940	Polyadenylate-binding protein 1	PABPC1	8q22.3	yes	no	yes	2	362	38	yes	yes	Evidence at protein level
NX_P12004	Proliferating cell nuclear antigen	PCNA	20p12.3	yes	yes	yes	1	138	21	yes	yes	Evidence at protein level
NX_P12081	Histidine--tRNA ligase, cytoplasmic	HARS	5q31.3	yes	yes	yes	4	350	7	yes	yes	Evidence at protein level
NX_P12107	Collagen alpha-1(XI) chain	COL11A1	1p21.1	yes	yes	no	4	1376	11	no	yes	Evidence at protein level
NX_P12235	ADP/ATP translocase 1	SLC25A4	4q35.1	yes	yes	no	1	189	9	yes	yes	Evidence at protein level
NX_P12236	ADP/ATP translocase 3	SLC25A6	Xp22.33	yes	no	no	1	128	11	no	yes	Evidence at protein level
NX_P12268	Inosine-5'-monophosphate dehydrogenase 2	IMPDH2	3p21.31	yes	no	yes	1	303	30	no	yes	Evidence at protein level
NX_P12277	Creatine kinase B-type	CKB	14q32.33	yes	no	yes	1	244	22	yes	yes	Evidence at protein level
NX_P13639	Elongation factor 2	EEF2	19p13.3	yes	yes	yes	1	530	62	yes	yes	Evidence at protein level
NX_P13667	Protein disulfide-isomerase A4	PDIA4	7q36.1	yes	no	yes	1	572	18	no	yes	Evidence at protein level
NX_P13861	cAMP-dependent protein kinase type II-alpha regulatory subunit	PRKAR2A	3p21.31	yes	no	yes	2	291	18	no	yes	Evidence at protein level
NX_P13929	Beta-enolase	ENO3	17p13.2	yes	yes	yes	3	429	11	no	yes	Evidence at protein level
NX_P14618	Pyruvate kinase PKM	PKM	15q23	yes	no	yes	3	436	88	yes	yes	Evidence at protein level
NX_P14678	Small nuclear ribonucleoprotein-associated proteins B and B'	SNRPB	20p13	yes	yes	yes	3	184	11	yes	yes	Evidence at protein level
NX_P14735	Insulin-degrading enzyme	IDE	10q23.33	yes	no	yes	2	697	9	yes	yes	Evidence at protein level
NX_P14866	Heterogeneous nuclear ribonucleoprotein L	HNRNPL	19q13.2	yes	no	yes	2	377	42	yes	yes	Evidence at protein level
NX_P14868	Aspartate--tRNA ligase, cytoplasmic	DARS	2q21.3	yes	yes	yes	2	405	11	no	yes	Evidence at protein level
NX_P15313	V-type proton ATPase subunit B, kidney isoform	ATP6V1B1	2p13.3	yes	yes	no	1	376	0	yes	yes	Evidence at protein level
NX_P15498	Proto-oncogene vav	VAV1	19p13.3	yes	no	yes	2	558	15	yes	yes	Evidence at protein level
NX_P16070	CD44 antigen	CD44	11p13	yes	no	yes	19	642	61	no	yes	Evidence at protein level
NX_P16452	Erythrocyte membrane protein band 4.2	EPB42	15q15.2	yes	yes	no	3	505	3	no	yes	Evidence at protein level
NX_P16949	Stathmin	STMN1	1p36.11	yes	no	no	2	105	22	no	yes	Evidence at protein level
NX_P16989	Y-box-binding protein 3	YBX3	12p13.2	yes	no	no	3	408	27	no	yes	Evidence at protein level
NX_P17174	Aspartate aminotransferase, cytoplasmic	GOT1	10q24.2	yes	no	yes	2	270	8	yes	yes	Evidence at protein level
NX_P17612	cAMP-dependent protein kinase catalytic subunit alpha	PRKACA	19p13.12	yes	yes	yes	2	213	14	yes	yes	Evidence at protein level
NX_P17661	Desmin	DES	2q35	yes	yes	no	1	541	41	yes	yes	Evidence at protein level
NX_P17844	Probable ATP-dependent RNA helicase DDX5	DDX5	17q23.3	yes	no	yes	2	303	45	yes	yes	Evidence at protein level
NX_P17980	26S proteasome regulatory subunit 6A	PSMC3	11p11.2	yes	no	yes	1	208	26	no	yes	Evidence at protein level
NX_P17987	T-complex protein 1 subunit alpha	TCP1	6q25.3	yes	no	yes	1	338	32	no	yes	Evidence at protein level
NX_P18077	60S ribosomal protein L35a	RPL35A	3q29	yes	yes	yes	1	55	7	no	yes	Evidence at protein level
NX_P18754	Regulator of chromosome condensation	RCC1	1p35.3	yes	no	yes	2	302	13	yes	yes	Evidence at protein level
NX_P18858	DNA ligase 1	LIG1	19q13.33	yes	no	yes	3	820	46	no	yes	Evidence at protein level
NX_P19387	DNA-directed RNA polymerase II subunit RPB3	POLR2C	16q21	yes	no	yes	1	141	7	no	yes	Evidence at protein level
NX_P19397	Leukocyte surface antigen CD53	CD53	1p13.3	yes	no	no	1	133	2	no	yes	Evidence at protein level
NX_P19838	Nuclear factor NF-kappa-B p105 subunit	NFKB1	4q24	yes	yes	yes	3	579	31	yes	yes	Evidence at protein level
NX_P20073	Annexin A7	ANXA7	10q22.2	yes	no	no	2	399	6	no	yes	Evidence at protein level
NX_P20674	Cytochrome c oxidase subunit 5A, mitochondrial	COX5A	15q24.2	yes	yes	yes	1	104	7	yes	yes	Evidence at protein level
NX_P22102	Trifunctional purine biosynthetic protein adenosine-3	GART	21q22.11	yes	no	yes	2	753	34	no	yes	Evidence at protein level
NX_P22626	Heterogeneous nuclear ribonucleoproteins A2/B1	HNRNPA2B1	7p15.2	yes	yes	yes	2	214	75	yes	yes	Evidence at protein level
NX_P22695	Cytochrome b-c1 complex subunit 2, mitochondrial	UQCRC2	16p12.2	yes	yes	yes	1	345	14	no	yes	Evidence at protein level
NX_P23193	Transcription elongation factor A protein 1	TCEA1	8q11.23	yes	yes	yes	2	163	17	no	yes	Evidence at protein level
NX_P23284	Peptidyl-prolyl cis-trans isomerase B	PPIB	15q22.31	yes	yes	yes	1	191	14	yes	yes	Evidence at protein level
NX_P23434	Glycine cleavage system H protein, mitochondrial	GCSH	16q23.2	yes	yes	no	1	161	5	no	yes	Evidence at protein level
NX_P23511	Nuclear transcription factor Y subunit alpha	NFYA	6p21.1	yes	no	yes	2	167	4	no	yes	Evidence at protein level
NX_P23526	Adenosylhomocysteinase	AHCY	20q11.22	yes	yes	yes	2	348	12	no	yes	Evidence at protein level
NX_P23921	Ribonucleoside-diphosphate reductase large subunit	RRM1	11p15.4	yes	no	yes	1	347	34	yes	yes	Evidence at protein level
NX_P25098	Beta-adrenergic receptor kinase 1	GRK2	11q13.2	yes	no	yes	1	437	11	yes	yes	Evidence at protein level
NX_P25685	DnaJ homolog subfamily B member 1	DNAJB1	19p13.12	yes	yes	yes	2	338	5	no	yes	Evidence at protein level
NX_P25705	ATP synthase subunit alpha, mitochondrial	ATP5F1A	18q21.1	yes	yes	no	3	357	59	no	yes	Evidence at protein level
NX_P26196	Probable ATP-dependent RNA helicase DDX6	DDX6	11q23.3	yes	yes	yes	1	139	9	yes	yes	Evidence at protein level
NX_P26358	DNA (cytosine-5)-methyltransferase 1	DNMT1	19p13.2	yes	yes	yes	3	967	63	yes	yes	Evidence at protein level
NX_P26368	Splicing factor U2AF 65 kDa subunit	U2AF2	19q13.42	yes	no	yes	2	224	25	yes	yes	Evidence at protein level
NX_P26373	60S ribosomal protein L13	RPL13	16q24.3	yes	no	yes	2	245	21	no	yes	Evidence at protein level
NX_P26599	Polypyrimidine tract-binding protein 1	PTBP1	19p13.3	yes	no	yes	3	487	26	no	yes	Evidence at protein level
NX_P27635	60S ribosomal protein L10	RPL10	Xq28	yes	yes	yes	1	6	8	yes	yes	Evidence at protein level
NX_P27707	Deoxycytidine kinase	DCK	4q13.3	yes	no	yes	1	185	15	yes	yes	Evidence at protein level
NX_P28072	Proteasome subunit beta type-6	PSMB6	17p13.2	yes	no	yes	1	179	5	no	yes	Evidence at protein level
NX_P28074	Proteasome subunit beta type-5	PSMB5	14q11.2	yes	no	yes	3	221	8	yes	yes	Evidence at protein level
NX_P28340	DNA polymerase delta catalytic subunit	POLD1	19q13.33	yes	yes	no	1	1127	26	yes	yes	Evidence at protein level
NX_P29372	DNA-3-methyladenine glycosylase	MPG	16p13.3	yes	no	yes	4	346	7	no	yes	Evidence at protein level
NX_P29466	Caspase-1	CASP1	11q22.3	yes	no	yes	5	370	3	yes	yes	Evidence at protein level
NX_P29692	Elongation factor 1-delta	EEF1D	8q24.3	yes	no	yes	4	671	29	no	yes	Evidence at protein level
NX_P30048	Thioredoxin-dependent peroxide reductase, mitochondrial	PRDX3	10q26.11	yes	no	yes	2	223	16	yes	yes	Evidence at protein level
NX_P30101	Protein disulfide-isomerase A3	PDIA3	15q15.3	yes	no	yes	1	378	29	yes	yes	Evidence at protein level
NX_P30153	Serine/threonine-protein phosphatase 2A 65 kDa regulatory subunit A alpha isoform	PPP2R1A	19q13.41	yes	yes	yes	1	311	19	no	yes	Evidence at protein level
NX_P30837	Aldehyde dehydrogenase X, mitochondrial	ALDH1B1	9p13.1	yes	no	no	1	514	16	no	yes	Evidence at protein level
NX_P31150	Rab GDP dissociation inhibitor alpha	GDI1	Xq28	yes	yes	no	1	156	3	no	yes	Evidence at protein level
NX_P31483	Nucleolysin TIA-1 isoform p40	TIA1	2p13.3	yes	yes	yes	3	269	3	yes	yes	Evidence at protein level
NX_P31689	DnaJ homolog subfamily A member 1	DNAJA1	9p21.1	yes	no	yes	2	217	27	yes	yes	Evidence at protein level
NX_P31937	3-hydroxyisobutyrate dehydrogenase, mitochondrial	HIBADH	7p15.2	yes	no	yes	1	250	21	no	yes	Evidence at protein level
NX_P31939	Bifunctional purine biosynthesis protein PURH	ATIC	2q35	yes	yes	yes	2	514	21	yes	yes	Evidence at protein level
NX_P31942	Heterogeneous nuclear ribonucleoprotein H3	HNRNPH3	10q21.3	yes	no	no	6	192	40	no	yes	Evidence at protein level
NX_P31943	Heterogeneous nuclear ribonucleoprotein H	HNRNPH1	5q35.3	yes	yes	yes	1	181	27	no	yes	Evidence at protein level
NX_P31948	Stress-induced-phosphoprotein 1	STIP1	11q13.1	yes	no	yes	3	438	43	no	yes	Evidence at protein level
NX_P32321	Deoxycytidylate deaminase	DCTD	4q35.1	yes	no	yes	2	174	1	no	yes	Evidence at protein level
NX_P33121	Long-chain-fatty-acid--CoA ligase 1	ACSL1	4q35.1	yes	no	no	3	530	16	no	yes	Evidence at protein level
NX_P33316	Deoxyuridine 5'-triphosphate nucleotidohydrolase, mitochondrial	DUT	15q21.1	yes	no	yes	2	202	13	yes	yes	Evidence at protein level
NX_P33991	DNA replication licensing factor MCM4	MCM4	8q11.21	yes	yes	no	1	799	59	no	yes	Evidence at protein level
NX_P33992	DNA replication licensing factor MCM5	MCM5	22q12.3	yes	yes	no	1	616	18	no	yes	Evidence at protein level
NX_P33993	DNA replication licensing factor MCM7	MCM7	7q22.1	yes	no	no	3	750	37	no	yes	Evidence at protein level
NX_P34897	Serine hydroxymethyltransferase, mitochondrial	SHMT2	12q13.3	yes	no	yes	3	349	24	yes	yes	Evidence at protein level
NX_P34931	Heat shock 70 kDa protein 1-like	HSPA1L	6p21.33	yes	no	yes	1	595	5	yes	yes	Evidence at protein level
NX_P35249	Replication factor C subunit 4	RFC4	3q27.3	yes	no	no	2	345	10	no	yes	Evidence at protein level
NX_P35250	Replication factor C subunit 2	RFC2	7q11.23	yes	yes	no	2	183	10	no	yes	Evidence at protein level
NX_P35579	Myosin-9	MYH9	22q12.3	yes	yes	yes	2	1386	93	yes	yes	Evidence at protein level
NX_P35637	RNA-binding protein FUS	FUS	16p11.2	yes	yes	yes	2	448	50	yes	yes	Evidence at protein level
NX_P35659	Protein DEK	DEK	6p22.3	yes	yes	yes	2	260	39	no	yes	Evidence at protein level
NX_P36404	ADP-ribosylation factor-like protein 2	ARL2	11q13.1	yes	no	yes	2	141	7	yes	yes	Evidence at protein level
NX_P36551	Oxygen-dependent coproporphyrinogen-III oxidase, mitochondrial	CPOX	3q11.2	yes	yes	yes	2	358	4	yes	yes	Evidence at protein level
NX_P36578	60S ribosomal protein L4	RPL4	15q22.31	yes	no	yes	1	323	39	no	yes	Evidence at protein level
NX_P37198	Nuclear pore glycoprotein p62	NUP62	19q13.33	yes	yes	yes	1	504	11	no	yes	Evidence at protein level
NX_P38159	RNA-binding motif protein, X chromosome	RBMX	Xq26.3	yes	yes	yes	3	360	33	yes	yes	Evidence at protein level
NX_P38606	V-type proton ATPase catalytic subunit A	ATP6V1A	3q13.31	yes	yes	no	2	336	11	yes	yes	Evidence at protein level
NX_P38646	Stress-70 protein, mitochondrial	HSPA9	5q31.2	yes	yes	yes	1	491	43	yes	yes	Evidence at protein level
NX_P38919	Eukaryotic initiation factor 4A-III	EIF4A3	17q25.3	yes	yes	yes	1	140	22	yes	yes	Evidence at protein level
NX_P39023	60S ribosomal protein L3	RPL3	22q13.1	yes	no	yes	1	294	25	no	yes	Evidence at protein level
NX_P39748	Flap endonuclease 1	FEN1	11q12.2	yes	no	yes	2	266	29	yes	yes	Evidence at protein level
NX_P40121	Macrophage-capping protein	CAPG	2p11.2	yes	no	yes	2	315	13	no	yes	Evidence at protein level
NX_P40227	T-complex protein 1 subunit zeta	CCT6A	7p11.2	yes	no	yes	2	339	30	no	yes	Evidence at protein level
NX_P40429	60S ribosomal protein L13a	RPL13A	19q13.33	yes	no	yes	1	170	11	yes	yes	Evidence at protein level
NX_P40763	Signal transducer and activator of transcription 3	STAT3	17q21.2	yes	yes	yes	3	422	34	yes	yes	Evidence at protein level
NX_P40938	Replication factor C subunit 3	RFC3	13q13.2	yes	no	no	2	285	7	no	yes	Evidence at protein level
NX_P41219	Peripherin	PRPH	12q13.12	yes	yes	no	2	454	9	no	yes	Evidence at protein level
NX_P41240	Tyrosine-protein kinase CSK	CSK	15q24.1	yes	no	yes	1	234	9	yes	yes	Evidence at protein level
NX_P41250	Glycine--tRNA ligase	GARS	7p14.3	yes	yes	yes	1	526	22	yes	yes	Evidence at protein level
NX_P41252	Isoleucine--tRNA ligase, cytoplasmic	IARS	9q22.31	yes	yes	no	1	940	15	no	yes	Evidence at protein level
NX_P42167	Lamina-associated polypeptide 2, isoforms beta/gamma	TMPO	12q23.1	yes	yes	no	3	394	64	no	yes	Evidence at protein level
NX_P42696	RNA-binding protein 34	RBM34	1q42.3	yes	no	no	2	347	10	no	yes	Evidence at protein level
NX_P42766	60S ribosomal protein L35	RPL35	9q33.3	yes	yes	yes	1	82	8	no	yes	Evidence at protein level
NX_P42768	Wiskott-Aldrich syndrome protein	WAS	Xp11.23	yes	yes	yes	1	251	14	yes	yes	Evidence at protein level
NX_P43007	Neutral amino acid transporter A	SLC1A4	2p14	yes	yes	no	2	410	11	yes	yes	Evidence at protein level
NX_P43246	DNA mismatch repair protein Msh2	MSH2	2p16.3	yes	yes	yes	2	1697	10	yes	yes	Evidence at protein level
NX_P43487	Ran-specific GTPase-activating protein	RANBP1	22q11.21	yes	no	yes	2	114	22	no	yes	Evidence at protein level
NX_P43686	26S proteasome regulatory subunit 6B	PSMC4	19q13.2	yes	no	yes	2	198	18	no	yes	Evidence at protein level
NX_P45880	Voltage-dependent anion-selective channel protein 2	VDAC2	10q22.2	yes	no	no	3	212	18	no	yes	Evidence at protein level
NX_P46060	Ran GTPase-activating protein 1	RANGAP1	22q13.2	yes	no	yes	1	480	25	yes	yes	Evidence at protein level
NX_P46109	Crk-like protein	CRKL	22q11.21	yes	yes	yes	1	180	22	yes	yes	Evidence at protein level
NX_P46776	60S ribosomal protein L27a	RPL27A	11p15.4	yes	no	yes	1	79	10	no	yes	Evidence at protein level
NX_P46777	60S ribosomal protein L5	RPL5	1p22.1	yes	yes	yes	1	224	22	no	yes	Evidence at protein level
NX_P46779	60S ribosomal protein L28	RPL28	19q13.42	yes	no	yes	5	287	13	no	yes	Evidence at protein level
NX_P47756	F-actin-capping protein subunit beta	CAPZB	1p36.13	yes	no	no	2	134	17	no	yes	Evidence at protein level
NX_P48444	Coatomer subunit delta	ARCN1	11q23.3	yes	yes	no	2	226	28	no	yes	Evidence at protein level
NX_P48556	26S proteasome non-ATPase regulatory subunit 8	PSMD8	19q13.2	yes	no	yes	1	336	11	no	yes	Evidence at protein level
NX_P48643	T-complex protein 1 subunit epsilon	CCT5	5p15.2	yes	yes	yes	2	384	35	no	yes	Evidence at protein level
NX_P48736	Phosphatidylinositol 4,5-bisphosphate 3-kinase catalytic subunit gamma isoform	PIK3CG	7q22.3	yes	no	yes	1	1026	4	yes	yes	Evidence at protein level
NX_P49321	Nuclear autoantigenic sperm protein	NASP	1p34.1	yes	no	no	4	602	73	no	yes	Evidence at protein level
NX_P49327	Fatty acid synthase	FASN	17q25.3	yes	no	yes	1	2147	114	no	yes	Evidence at protein level
NX_P49368	T-complex protein 1 subunit gamma	CCT3	1q22	yes	no	yes	2	417	34	no	yes	Evidence at protein level
NX_P49411	Elongation factor Tu, mitochondrial	TUFM	16p11.2	yes	yes	no	1	329	20	no	yes	Evidence at protein level
NX_P49588	Alanine--tRNA ligase, cytoplasmic	AARS	16q22.1	yes	yes	yes	2	841	20	yes	yes	Evidence at protein level
NX_P49591	Serine--tRNA ligase, cytoplasmic	SARS	1p13.3	yes	yes	yes	1	289	8	yes	yes	Evidence at protein level
NX_P49643	DNA primase large subunit	PRIM2	6p11.2	yes	no	yes	2	433	16	no	yes	Evidence at protein level
NX_P49736	DNA replication licensing factor MCM2	MCM2	3q21.3	yes	yes	yes	1	698	35	yes	yes	Evidence at protein level
NX_P49915	GMP synthase [glutamine-hydrolyzing]	GMPS	3q25.31	yes	yes	yes	2	368	18	no	yes	Evidence at protein level
NX_P50395	Rab GDP dissociation inhibitor beta	GDI2	10p15.1	yes	no	no	2	280	19	no	yes	Evidence at protein level
NX_P50440	Glycine amidinotransferase, mitochondrial	GATM	15q21.1	yes	yes	yes	3	276	3	yes	yes	Evidence at protein level
NX_P50502	Hsc70-interacting protein	ST13	22q13.2	yes	no	yes	1	235	8	no	yes	Evidence at protein level
NX_P50552	Vasodilator-stimulated phosphoprotein	VASP	19q13.32	yes	no	yes	1	315	25	yes	yes	Evidence at protein level
NX_P50579	Methionine aminopeptidase 2	METAP2	12q22	yes	no	yes	3	252	14	no	yes	Evidence at protein level
NX_P50990	T-complex protein 1 subunit theta	CCT8	21q21.3	yes	no	yes	3	392	52	no	yes	Evidence at protein level
NX_P50991	T-complex protein 1 subunit delta	CCT4	2p15	yes	no	yes	2	351	32	no	yes	Evidence at protein level
NX_P51149	Ras-related protein Rab-7a	RAB7A	3q21.3	yes	yes	yes	1	92	12	yes	yes	Evidence at protein level
NX_P51532	Transcription activator BRG1	SMARCA4	19p13.2	yes	yes	yes	5	991	53	yes	yes	Evidence at protein level
NX_P51553	Isocitrate dehydrogenase [NAD] subunit gamma, mitochondrial	IDH3G	Xq28	yes	no	yes	2	169	2	yes	yes	Evidence at protein level
NX_P51608	Methyl-CpG-binding protein 2	MECP2	Xq28	yes	yes	yes	2	624	30	yes	yes	Evidence at protein level
NX_P51665	26S proteasome non-ATPase regulatory subunit 7	PSMD7	16q23.1	yes	no	yes	1	195	13	no	yes	Evidence at protein level
NX_P51684	C-C chemokine receptor type 6	CCR6	6q27	yes	yes	no	1	245	3	yes	yes	Evidence at protein level
NX_P51858	Hepatoma-derived growth factor	HDGF	1q23.1	yes	no	yes	3	222	19	yes	yes	Evidence at protein level
NX_P51991	Heterogeneous nuclear ribonucleoprotein A3	HNRNPA3	2q31.2	yes	no	no	2	169	60	no	yes	Evidence at protein level
NX_P52272	Heterogeneous nuclear ribonucleoprotein M	HNRNPM	19p13.2	yes	no	yes	2	636	66	no	yes	Evidence at protein level
NX_P52292	Importin subunit alpha-1	KPNA2	17q24.2	yes	no	yes	1	268	18	no	yes	Evidence at protein level
NX_P52597	Heterogeneous nuclear ribonucleoprotein F	HNRNPF	10q11.21	yes	no	yes	1	233	48	yes	yes	Evidence at protein level
NX_P52701	DNA mismatch repair protein Msh6	MSH6	2p16.3	yes	yes	yes	4	2319	56	yes	yes	Evidence at protein level
NX_P53007	Tricarboxylate transport protein, mitochondrial	SLC25A1	22q11.21	yes	yes	no	1	177	6	yes	yes	Evidence at protein level
NX_P53999	Activated RNA polymerase II transcriptional coactivator p15	SUB1	5p13.3	yes	no	yes	1	63	25	yes	yes	Evidence at protein level
NX_P54577	Tyrosine--tRNA ligase, cytoplasmic	YARS	1p35.1	yes	yes	yes	1	387	17	yes	yes	Evidence at protein level
NX_P54652	Heat shock-related 70 kDa protein 2	HSPA2	14q23.3	yes	no	yes	1	440	9	yes	yes	Evidence at protein level
NX_P54920	Alpha-soluble NSF attachment protein	NAPA	19q13.32	yes	no	no	1	198	8	yes	yes	Evidence at protein level
NX_P55036	26S proteasome non-ATPase regulatory subunit 4	PSMD4	1q21.3	yes	no	yes	2	241	15	no	yes	Evidence at protein level
NX_P55084	Trifunctional enzyme subunit beta, mitochondrial	HADHB	2p23.3	yes	yes	yes	2	389	20	no	yes	Evidence at protein level
NX_P55209	Nucleosome assembly protein 1-like 1	NAP1L1	12q21.2	yes	no	no	3	217	26	no	yes	Evidence at protein level
NX_P55735	Protein SEC13 homolog	SEC13	3p25.3	yes	no	yes	4	281	8	no	yes	Evidence at protein level
NX_P55809	Succinyl-CoA:3-ketoacid coenzyme A transferase 1, mitochondrial	OXCT1	5p13.1	yes	yes	yes	2	248	12	yes	yes	Evidence at protein level
NX_P55957	BH3-interacting domain death agonist	BID	22q11.21	yes	no	yes	4	304	6	no	yes	Evidence at protein level
NX_P56279	T-cell leukemia/lymphoma protein 1A	TCL1A	14q32.13	yes	yes	yes	1	134	0	yes	yes	Evidence at protein level
NX_P57740	Nuclear pore complex protein Nup107	NUP107	12q15	yes	yes	yes	3	586	33	yes	yes	Evidence at protein level
NX_P60842	Eukaryotic initiation factor 4A-I	EIF4A1	17p13.1	yes	no	yes	2	180	30	no	yes	Evidence at protein level
NX_P60981	Destrin	DSTN	20p12.1	yes	no	no	2	81	13	no	yes	Evidence at protein level
NX_P61019	Ras-related protein Rab-2A	RAB2A	8q12.1	yes	no	yes	2	54	6	no	yes	Evidence at protein level
NX_P61158	Actin-related protein 3	ACTR3	2q14.1	yes	no	no	1	171	21	no	yes	Evidence at protein level
NX_P61163	Alpha-centractin	ACTR1A	10q24.32	yes	no	no	1	170	6	no	yes	Evidence at protein level
NX_P61221	ATP-binding cassette sub-family E member 1	ABCE1	4q31.21	yes	no	no	1	192	28	no	yes	Evidence at protein level
NX_P61247	40S ribosomal protein S3a	RPS3A	4q31.3	yes	no	yes	1	116	25	no	yes	Evidence at protein level
NX_P61289	Proteasome activator complex subunit 3	PSME3	17q21.31	yes	no	no	3	143	15	yes	yes	Evidence at protein level
NX_P61599	N-alpha-acetyltransferase 20	NAA20	20p11.23	yes	no	no	2	126	1	no	yes	Evidence at protein level
NX_P61626	Lysozyme C	LYZ	12q15	yes	yes	yes	1	118	5	no	yes	Evidence at protein level
NX_P61923	Coatomer subunit zeta-1	COPZ1	12q13.13	yes	no	yes	5	139	7	yes	yes	Evidence at protein level
NX_P61962	DDB1- and CUL4-associated factor 7	DCAF7	17q23.3	yes	no	no	2	62	4	no	yes	Evidence at protein level
NX_P61978	Heterogeneous nuclear ribonucleoprotein K	HNRNPK	9q21.32	yes	yes	yes	3	229	76	yes	yes	Evidence at protein level
NX_P62070	Ras-related protein R-Ras2	RRAS2	11p15.2	yes	yes	yes	4	90	6	no	yes	Evidence at protein level
NX_P62191	26S proteasome regulatory subunit 4	PSMC1	14q32.11	yes	no	yes	2	123	20	no	yes	Evidence at protein level
NX_P62241	40S ribosomal protein S8	RPS8	1p34.1	yes	no	yes	1	103	16	no	yes	Evidence at protein level
NX_P62249	40S ribosomal protein S16	RPS16	19q13.2	yes	no	yes	1	85	12	no	yes	Evidence at protein level
NX_P62253	Ubiquitin-conjugating enzyme E2 G1	UBE2G1	17p13.2	yes	no	yes	1	65	6	no	yes	Evidence at protein level
NX_P62258	14-3-3 protein epsilon	YWHAE	17p13.3	yes	yes	yes	2	64	31	no	yes	Evidence at protein level
NX_P62266	40S ribosomal protein S23	RPS23	5q14.2	yes	yes	yes	1	32	7	yes	yes	Evidence at protein level
NX_P62277	40S ribosomal protein S13	RPS13	11p15.1	yes	no	yes	1	54	14	no	yes	Evidence at protein level
NX_P62318	Small nuclear ribonucleoprotein Sm D3	SNRPD3	22q11.23	yes	no	yes	2	38	6	no	yes	Evidence at protein level
NX_P62333	26S proteasome regulatory subunit 10B	PSMC6	14q22.1	yes	no	yes	1	163	18	no	yes	Evidence at protein level
NX_P62424	60S ribosomal protein L7a	RPL7A	9q34.2	yes	yes	yes	1	194	23	no	yes	Evidence at protein level
NX_P62491	Ras-related protein Rab-11A	RAB11A	15q22.31	yes	yes	yes	2	84	9	yes	yes	Evidence at protein level
NX_P62699	Protein yippee-like 5	YPEL5	2p23.1	yes	no	no	1	57	3	no	yes	Evidence at protein level
NX_P62750	60S ribosomal protein L23a	RPL23A	17q11.2	yes	no	yes	1	107	10	no	yes	Evidence at protein level
NX_P62753	40S ribosomal protein S6	RPS6	9p22.1	yes	no	yes	1	180	25	yes	yes	Evidence at protein level
NX_P62829	60S ribosomal protein L23	RPL23	17q12	yes	no	yes	1	47	7	no	yes	Evidence at protein level
NX_P62834	Ras-related protein Rap-1A	RAP1A	1p13.2	yes	yes	yes	1	85	2	no	yes	Evidence at protein level
NX_P62837	Ubiquitin-conjugating enzyme E2 D2	UBE2D2	5q31.2	yes	no	yes	2	35	1	yes	yes	Evidence at protein level
NX_P62851	40S ribosomal protein S25	RPS25	11q23.3	yes	no	yes	1	54	15	no	yes	Evidence at protein level
NX_P62854	40S ribosomal protein S26	RPS26	12q13.2	yes	yes	yes	1	36	3	no	yes	Evidence at protein level
NX_P62857	40S ribosomal protein S28	RPS28	19p13.2	yes	yes	yes	1	38	3	no	yes	Evidence at protein level
NX_P62888	60S ribosomal protein L30	RPL30	8q22.2	yes	no	yes	1	41	14	no	yes	Evidence at protein level
NX_P62913	60S ribosomal protein L11	RPL11	1p36.11	yes	yes	yes	2	91	17	no	yes	Evidence at protein level
NX_P62987	Ubiquitin-60S ribosomal protein L40	UBA52	19p13.11	yes	no	yes	1	66	12	yes	yes	Evidence at protein level
NX_P62995	Transformer-2 protein homolog beta	TRA2B	3q27.2	yes	no	yes	3	125	33	no	yes	Evidence at protein level
NX_P63151	Serine/threonine-protein phosphatase 2A 55 kDa regulatory subunit B alpha isoform	PPP2R2A	8p21.2	yes	no	yes	2	198	5	no	yes	Evidence at protein level
NX_P63165	Small ubiquitin-related modifier 1	SUMO1	2q33.1	yes	yes	yes	2	41	22	yes	yes	Evidence at protein level
NX_P63167	Dynein light chain 1, cytoplasmic	DYNLL1	12q24.31	yes	no	yes	1	33	9	yes	yes	Evidence at protein level
NX_P63172	Dynein light chain Tctex-type 1	DYNLT1	6q25.3	yes	no	yes	1	110	2	no	yes	Evidence at protein level
NX_P67809	Y-box-binding protein 1	YBX1	1p34.2	yes	no	yes	1	253	28	yes	yes	Evidence at protein level
NX_P68363	Tubulin alpha-1B chain	TUBA1B	12q13.12	yes	no	yes	2	78	11	no	yes	Evidence at protein level
NX_P68371	Tubulin beta-4B chain	TUBB4B	9q34.3	yes	yes	no	1	152	7	yes	yes	Evidence at protein level
NX_P78371	T-complex protein 1 subunit beta	CCT2	12q15	yes	no	yes	2	336	35	no	yes	Evidence at protein level
NX_P78527	DNA-dependent protein kinase catalytic subunit	PRKDC	8q11.21	yes	yes	yes	2	3099	183	yes	yes	Evidence at protein level
NX_P80217	Interferon-induced 35 kDa protein	IFI35	17q21.31	yes	no	no	2	271	1	no	yes	Evidence at protein level
NX_P81277	Prolactin-releasing peptide	PRLH	2q37.3	no	no	no	1	111	1	yes	yes	Evidence at protein level
NX_P82664	28S ribosomal protein S10, mitochondrial	MRPS10	6p21.1	yes	no	yes	1	176	0	no	yes	Evidence at protein level
NX_P82675	28S ribosomal protein S5, mitochondrial	MRPS5	2q11.1	yes	no	yes	2	408	1	no	yes	Evidence at protein level
NX_P83881	60S ribosomal protein L36a	RPL36A	Xq22.1	yes	no	yes	1	22	0	no	yes	Evidence at protein level
NX_P98175	RNA-binding protein 10	RBM10	Xp11.3	yes	yes	yes	5	261	39	no	yes	Evidence at protein level
NX_Q00325	Phosphate carrier protein, mitochondrial	SLC25A3	12q23.1	yes	yes	no	2	296	19	no	yes	Evidence at protein level
NX_Q00610	Clathrin heavy chain 1	CLTC	17q23.1	yes	yes	yes	2	621	55	yes	yes	Evidence at protein level
NX_Q00688	Peptidyl-prolyl cis-trans isomerase FKBP3	FKBP3	14q21.2	yes	no	yes	1	194	13	no	yes	Evidence at protein level
NX_Q01085	Nucleolysin TIAR	TIAL1	10q26.11	yes	no	yes	2	157	5	no	yes	Evidence at protein level
NX_Q01105	Protein SET	SET	9q34.11	yes	yes	yes	4	193	20	no	yes	Evidence at protein level
NX_Q01130	Serine/arginine-rich splicing factor 2	SRSF2	17q25.1	yes	yes	yes	2	151	24	no	yes	Evidence at protein level
NX_Q01469	Fatty acid-binding protein 5	FABP5	8q21.13	yes	no	yes	1	108	11	yes	yes	Evidence at protein level
NX_Q02556	Interferon regulatory factor 8	IRF8	16q24.1	yes	yes	no	1	309	3	yes	yes	Evidence at protein level
NX_Q02880	DNA topoisomerase 2-beta	TOP2B	3p24.2	yes	yes	yes	2	952	103	yes	yes	Evidence at protein level
NX_Q03001	Dystonin	DST	6p12.1	yes	yes	yes	9	6873	79	yes	yes	Evidence at protein level
NX_Q04864	Proto-oncogene c-Rel	REL	2p16.1	yes	no	no	2	436	6	no	yes	Evidence at protein level
NX_Q04917	14-3-3 protein eta	YWHAH	22q12.3	yes	no	yes	1	111	9	no	yes	Evidence at protein level
NX_Q05519	Serine/arginine-rich splicing factor 11	SRSF11	1p31.1	yes	no	no	2	316	30	no	yes	Evidence at protein level
NX_Q07020	60S ribosomal protein L18	RPL18	19q13.33	yes	yes	yes	2	102	14	no	yes	Evidence at protein level
NX_Q07666	KH domain-containing, RNA-binding, signal transduction-associated protein 1	KHDRBS1	1p35.2	yes	no	yes	3	283	57	yes	yes	Evidence at protein level
NX_Q08170	Serine/arginine-rich splicing factor 4	SRSF4	1p35.3	yes	no	no	1	369	17	no	yes	Evidence at protein level
NX_Q08752	Peptidyl-prolyl cis-trans isomerase D	PPID	4q32.1	yes	no	no	1	301	10	yes	yes	Evidence at protein level
NX_Q09028	Histone-binding protein RBBP4	RBBP4	1p35.1	yes	no	yes	4	123	17	no	yes	Evidence at protein level
NX_Q12769	Nuclear pore complex protein Nup160	NUP160	11p11.2	yes	yes	yes	3	1168	15	no	yes	Evidence at protein level
NX_Q12800	Alpha-globin transcription factor CP2	TFCP2	12q13.12	yes	no	no	4	276	6	yes	yes	Evidence at protein level
NX_Q12824	SWI/SNF-related matrix-associated actin-dependent regulator of chromatin subfamily B member 1	SMARCB1	22q11.23	yes	yes	yes	2	206	10	yes	yes	Evidence at protein level
NX_Q12874	Splicing factor 3A subunit 3	SF3A3	1p34.3	yes	no	yes	1	176	17	yes	yes	Evidence at protein level
NX_Q12931	Heat shock protein 75 kDa, mitochondrial	TRAP1	16p13.3	yes	no	yes	2	857	24	no	yes	Evidence at protein level
NX_Q12965	Unconventional myosin-Ie	MYO1E	15q22.2	yes	yes	no	1	933	20	yes	yes	Evidence at protein level
NX_Q13112	Chromatin assembly factor 1 subunit B	CHAF1B	21q22.12	yes	no	no	1	378	35	no	yes	Evidence at protein level
NX_Q13151	Heterogeneous nuclear ribonucleoprotein A0	HNRNPA0	5q31.2	yes	no	no	1	187	41	no	yes	Evidence at protein level
NX_Q13153	Serine/threonine-protein kinase PAK 1	PAK1	11q13.5	yes	yes	yes	2	282	32	yes	yes	Evidence at protein level
NX_Q13177	Serine/threonine-protein kinase PAK 2	PAK2	3q29	yes	no	yes	1	277	34	yes	yes	Evidence at protein level
NX_Q13185	Chromobox protein homolog 3	CBX3	7p15.2	yes	no	yes	1	107	28	no	yes	Evidence at protein level
NX_Q13243	Serine/arginine-rich splicing factor 5	SRSF5	14q24.1	yes	no	no	3	206	11	no	yes	Evidence at protein level
NX_Q13247	Serine/arginine-rich splicing factor 6	SRSF6	20q13.11	yes	no	no	3	304	20	yes	yes	Evidence at protein level
NX_Q13283	Ras GTPase-activating protein-binding protein 1	G3BP1	5q33.1	yes	no	yes	2	350	45	yes	yes	Evidence at protein level
NX_Q13356	RING-type E3 ubiquitin-protein ligase PPIL2	PPIL2	22q11.21	yes	no	yes	2	438	9	yes	yes	Evidence at protein level
NX_Q13363	C-terminal-binding protein 1	CTBP1	4p16.3	yes	yes	yes	2	281	7	yes	yes	Evidence at protein level
NX_Q13422	DNA-binding protein Ikaros	IKZF1	7p12.2	yes	yes	yes	8	392	42	yes	yes	Evidence at protein level
NX_Q13451	Peptidyl-prolyl cis-trans isomerase FKBP5	FKBP5	6p21.31	yes	no	yes	2	335	12	no	yes	Evidence at protein level
NX_Q13509	Tubulin beta-3 chain	TUBB3	16q24.3	yes	yes	yes	2	247	9	yes	yes	Evidence at protein level
NX_Q13561	Dynactin subunit 2	DCTN2	12q13.3	yes	no	no	3	279	20	no	yes	Evidence at protein level
NX_Q13596	Sorting nexin-1	SNX1	15q22.31	yes	no	yes	3	450	18	yes	yes	Evidence at protein level
NX_Q13618	Cullin-3	CUL3	2q36.2	yes	yes	yes	3	374	13	no	yes	Evidence at protein level
NX_Q13620	Cullin-4B	CUL4B	Xq24	yes	yes	yes	3	374	40	yes	yes	Evidence at protein level
NX_Q13765	Nascent polypeptide-associated complex subunit alpha	NACA	12q13.3	yes	yes	yes	1	89	10	no	yes	Evidence at protein level
NX_Q13822	Ectonucleotide pyrophosphatase/phosphodiesterase family member 2	ENPP2	8q24.12	yes	yes	yes	3	794	20	yes	yes	Evidence at protein level
NX_Q13885	Tubulin beta-2A chain	TUBB2A	6p25.2	yes	yes	no	1	110	10	yes	yes	Evidence at protein level
NX_Q14011	Cold-inducible RNA-binding protein	CIRBP	19p13.3	yes	no	yes	3	326	13	no	yes	Evidence at protein level
NX_Q14019	Coactosin-like protein	COTL1	16q24.1	yes	no	yes	1	167	4	yes	yes	Evidence at protein level
NX_Q14103	Heterogeneous nuclear ribonucleoprotein D0	HNRNPD	4q21.22	yes	no	yes	4	213	47	no	yes	Evidence at protein level
NX_Q14155	Rho guanine nucleotide exchange factor 7	ARHGEF7	13q34	yes	no	yes	6	606	29	no	yes	Evidence at protein level
NX_Q14161	ARF GTPase-activating protein GIT2	GIT2	12q24.11	yes	no	no	11	495	47	no	yes	Evidence at protein level
NX_Q14204	Cytoplasmic dynein 1 heavy chain 1	DYNC1H1	14q32.31	yes	yes	yes	1	1983	36	yes	yes	Evidence at protein level
NX_Q14331	Protein FRG1	FRG1	4q35.2	yes	yes	no	1	287	2	no	yes	Evidence at protein level
NX_Q14498	RNA-binding protein 39	RBM39	20q11.22	yes	no	yes	3	221	30	no	yes	Evidence at protein level
NX_Q14566	DNA replication licensing factor MCM6	MCM6	2q21.3	yes	yes	yes	1	607	33	yes	yes	Evidence at protein level
NX_Q14568	Heat shock protein HSP 90-alpha A2	HSP90AA2P	11p14.1	yes	no	no	1	2	2	no	no	Evidence at protein level
NX_Q14696	LRP chaperone MESD	MESD	15q25.1	yes	no	no	2	269	3	no	yes	Evidence at protein level
NX_Q14739	Delta(14)-sterol reductase LBR	LBR	1q42.12	yes	yes	yes	1	533	27	yes	yes	Evidence at protein level
NX_Q14847	LIM and SH3 domain protein 1	LASP1	17q12	yes	no	yes	3	199	28	no	yes	Evidence at protein level
NX_Q15003	Condensin complex subunit 2	NCAPH	2q11.2	yes	yes	yes	2	569	44	yes	yes	Evidence at protein level
NX_Q15019	Septin-2	SEPTIN2	2q37.3	yes	no	yes	3	260	14	yes	yes	Evidence at protein level
NX_Q15021	Condensin complex subunit 1	NCAPD2	12p13.31	yes	yes	no	1	1151	36	yes	yes	Evidence at protein level
NX_Q15054	DNA polymerase delta subunit 3	POLD3	11q13.4	yes	no	yes	3	361	19	yes	yes	Evidence at protein level
NX_Q15056	Eukaryotic translation initiation factor 4H	EIF4H	7q11.23	yes	yes	no	2	110	30	no	yes	Evidence at protein level
NX_Q15084	Protein disulfide-isomerase A6	PDIA6	2p25.1	yes	no	yes	5	430	14	yes	yes	Evidence at protein level
NX_Q15126	Phosphomevalonate kinase	PMVK	1q21.3	yes	yes	yes	1	148	3	yes	yes	Evidence at protein level
NX_Q15181	Inorganic pyrophosphatase	PPA1	10q22.1	yes	no	yes	1	215	16	no	yes	Evidence at protein level
NX_Q15233	Non-POU domain-containing octamer-binding protein	NONO	Xq13.1	yes	yes	yes	2	213	51	yes	yes	Evidence at protein level
NX_Q15365	Poly(rC)-binding protein 1	PCBP1	2p13.3	yes	no	yes	1	167	33	no	yes	Evidence at protein level
NX_Q15366	Poly(rC)-binding protein 2	PCBP2	12q13.13	yes	no	yes	8	142	33	no	yes	Evidence at protein level
NX_Q15370	Elongin-B	ELOB	16p13.3	yes	no	yes	2	132	7	no	yes	Evidence at protein level
NX_Q15428	Splicing factor 3A subunit 2	SF3A2	19p13.3	yes	no	yes	1	331	9	no	yes	Evidence at protein level
NX_Q15435	Protein phosphatase 1 regulatory subunit 7	PPP1R7	2q37.3	yes	no	yes	5	253	18	yes	yes	Evidence at protein level
NX_Q15554	Telomeric repeat-binding factor 2	TERF2	16q22.1	yes	no	yes	2	359	15	no	yes	Evidence at protein level
NX_Q15555	Microtubule-associated protein RP/EB family member 2	MAPRE2	18q12.1	yes	yes	no	5	184	15	yes	yes	Evidence at protein level
NX_Q15691	Microtubule-associated protein RP/EB family member 1	MAPRE1	20q11.21	yes	no	yes	1	146	19	yes	yes	Evidence at protein level
NX_Q15717	ELAV-like protein 1	ELAVL1	19p13.2	yes	no	yes	2	163	23	yes	yes	Evidence at protein level
NX_Q15785	Mitochondrial import receptor subunit TOM34	TOMM34	20q13.12	yes	no	no	1	177	9	no	yes	Evidence at protein level
NX_Q15910	Histone-lysine N-methyltransferase EZH2	EZH2	7q36.1	yes	yes	yes	5	565	24	yes	yes	Evidence at protein level
NX_Q16352	Alpha-internexin	INA	10q24.33	yes	no	no	1	391	8	no	yes	Evidence at protein level
NX_Q16543	Hsp90 co-chaperone Cdc37	CDC37	19p13.2	yes	no	yes	1	291	21	no	yes	Evidence at protein level
NX_Q16555	Dihydropyrimidinase-related protein 2	DPYSL2	8p21.2	yes	no	yes	2	281	26	yes	yes	Evidence at protein level
NX_Q16560	U11/U12 small nuclear ribonucleoprotein 35 kDa protein	SNRNP35	12q24.31	yes	no	no	2	195	1	no	yes	Evidence at protein level
NX_Q16629	Serine/arginine-rich splicing factor 7	SRSF7	2p22.1	yes	no	yes	4	126	19	yes	yes	Evidence at protein level
NX_Q16630	Cleavage and polyadenylation specificity factor subunit 6	CPSF6	12q15	yes	no	yes	3	268	15	yes	yes	Evidence at protein level
NX_Q16822	Phosphoenolpyruvate carboxykinase [GTP], mitochondrial	PCK2	14q11.2	yes	yes	no	3	666	6	no	yes	Evidence at protein level
NX_Q16851	UTP--glucose-1-phosphate uridylyltransferase	UGP2	2p15	yes	no	yes	2	319	15	yes	yes	Evidence at protein level
NX_Q2VIR3	Eukaryotic translation initiation factor 2 subunit 3B	EIF2S3B	12p13.2	yes	no	no	2	420	5	no	yes	Evidence at protein level
NX_Q32P51	Heterogeneous nuclear ribonucleoprotein A1-like 2	HNRNPA1L2	13q14.3	yes	no	no	1	242	13	no	yes	Evidence at protein level
NX_Q3MHD2	Protein LSM12 homolog	LSM12	17q21.31	yes	no	no	2	83	8	no	yes	Evidence at protein level
NX_Q5JTV8	Torsin-1A-interacting protein 1	TOR1AIP1	1q25.2	yes	yes	yes	3	545	45	no	yes	Evidence at protein level
NX_Q5T1C6	Acyl-coenzyme A thioesterase THEM4	THEM4	1q21.3	yes	no	yes	1	194	7	yes	yes	Evidence at protein level
NX_Q5T8P6	RNA-binding protein 26	RBM26	13q31.1	yes	no	no	6	665	20	no	yes	Evidence at protein level
NX_Q5TBB1	Ribonuclease H2 subunit B	RNASEH2B	13q14.3	yes	yes	yes	2	272	4	yes	yes	Evidence at protein level
NX_Q5TEJ8	Protein THEMIS2	THEMIS2	1p35.3	yes	no	no	6	513	3	no	yes	Evidence at protein level
NX_Q5VYK3	Proteasome adapter and scaffold protein ECM29	ECPAS	9q31.3	yes	no	no	1	1	21	no	yes	Evidence at protein level
NX_Q5XPI4	E3 ubiquitin-protein ligase RNF123	RNF123	3p21.31	yes	no	yes	2	1065	12	no	yes	Evidence at protein level
NX_Q6IBS0	Twinfilin-2	TWF2	3p21.2	yes	no	yes	1	253	5	no	yes	Evidence at protein level
NX_Q6NXE6	Armadillo repeat-containing protein 6	ARMC6	19p13.11	yes	no	no	2	446	12	no	yes	Evidence at protein level
NX_Q6P1L8	39S ribosomal protein L14, mitochondrial	MRPL14	6p21.1	yes	no	yes	1	137	1	no	yes	Evidence at protein level
NX_Q6P5R6	60S ribosomal protein L22-like 1	RPL22L1	3q26.2	yes	no	no	1	97	5	no	yes	Evidence at protein level
NX_Q6PL24	Protein TMED8	TMED8	14q24.3	yes	no	no	1	266	14	no	yes	Evidence at protein level
NX_Q6UN15	Pre-mRNA 3'-end-processing factor FIP1	FIP1L1	4q12	yes	yes	no	4	361	29	no	yes	Evidence at protein level
NX_Q6ZMR3	L-lactate dehydrogenase A-like 6A	LDHAL6A	11p15.1	yes	no	no	1	290	15	no	yes	Evidence at protein level
NX_Q71U36	Tubulin alpha-1A chain	TUBA1A	12q13.12	yes	yes	yes	2	135	5	no	yes	Evidence at protein level
NX_Q71UM5	40S ribosomal protein S27-like	RPS27L	15q22.2	yes	no	no	1	56	0	no	yes	Evidence at protein level
NX_Q7L2H7	Eukaryotic translation initiation factor 3 subunit M	EIF3M	11p13	yes	no	yes	2	254	18	yes	yes	Evidence at protein level
NX_Q7L513	Fc receptor-like A	FCRLA	1q23.3	yes	no	yes	15	378	2	no	yes	Evidence at protein level
NX_Q7L576	Cytoplasmic FMR1-interacting protein 1	CYFIP1	15q11.2	yes	no	yes	3	909	8	yes	yes	Evidence at protein level
NX_Q7L591	Docking protein 3	DOK3	5q35.3	yes	no	no	4	626	16	no	yes	Evidence at protein level
NX_Q7L5N1	COP9 signalosome complex subunit 6	COPS6	7q22.1	yes	no	yes	1	186	8	no	yes	Evidence at protein level
NX_Q7Z3B4	Nucleoporin p54	NUP54	4q21.1	yes	no	yes	3	291	3	no	yes	Evidence at protein level
NX_Q7Z4H3	HD domain-containing protein 2	HDDC2	6q22.31	yes	no	yes	3	202	5	no	yes	Evidence at protein level
NX_Q7Z7H8	39S ribosomal protein L10, mitochondrial	MRPL10	17q21.32	yes	no	yes	2	249	0	no	yes	Evidence at protein level
NX_Q86SX6	Glutaredoxin-related protein 5, mitochondrial	GLRX5	14q32.13	yes	yes	yes	1	151	3	yes	yes	Evidence at protein level
NX_Q86SZ2	Trafficking protein particle complex subunit 6B	TRAPPC6B	14q21.1	yes	yes	yes	2	138	2	yes	yes	Evidence at protein level
NX_Q86UX7	Fermitin family homolog 3	FERMT3	11q13.1	yes	yes	yes	2	556	12	yes	yes	Evidence at protein level
NX_Q86VP6	Cullin-associated NEDD8-dissociated protein 1	CAND1	12q14.3	yes	no	yes	3	582	29	no	yes	Evidence at protein level
NX_Q86YP4	Transcriptional repressor p66-alpha	GATAD2A	19p13.11	yes	no	yes	3	538	71	yes	yes	Evidence at protein level
NX_Q8IUI8	Cytokine receptor-like factor 3	CRLF3	17q11.2	yes	no	no	2	301	1	no	yes	Evidence at protein level
NX_Q8IY67	Ribonucleoprotein PTB-binding 1	RAVER1	19p13.2	yes	no	yes	3	716	49	no	yes	Evidence at protein level
NX_Q8IZ07	Ankyrin repeat domain-containing protein 13A	ANKRD13A	12q24.11	yes	no	no	1	395	13	yes	yes	Evidence at protein level
NX_Q8IZQ5	Selenoprotein H	SELENOH	11q12.1	yes	no	no	1	142	5	no	yes	Evidence at protein level
NX_Q8N5K1	CDGSH iron-sulfur domain-containing protein 2	CISD2	4q24	yes	yes	yes	1	78	5	yes	yes	Evidence at protein level
NX_Q8N983	39S ribosomal protein L43, mitochondrial	MRPL43	10q24.31	yes	no	yes	6	296	0	no	yes	Evidence at protein level
NX_Q8NBJ7	Inactive C-alpha-formylglycine-generating enzyme 2	SUMF2	7p11.2	yes	no	yes	5	420	2	yes	yes	Evidence at protein level
NX_Q8NC51	Plasminogen activator inhibitor 1 RNA-binding protein	SERBP1	1p31.3	yes	no	yes	4	288	72	yes	yes	Evidence at protein level
NX_Q8NFH5	Nucleoporin NUP35	NUP35	2q32.1	yes	no	yes	3	243	46	no	yes	Evidence at protein level
NX_Q8NFZ5	TNFAIP3-interacting protein 2	TNIP2	4p16.3	yes	no	yes	2	396	4	yes	yes	Evidence at protein level
NX_Q8TAT6	Nuclear protein localization protein 4 homolog	NPLOC4	17q25.3	yes	no	no	2	430	19	yes	yes	Evidence at protein level
NX_Q8TBC4	NEDD8-activating enzyme E1 catalytic subunit	UBA3	3p14.1	yes	no	yes	2	333	12	yes	yes	Evidence at protein level
NX_Q8TCC7	Solute carrier family 22 member 8	SLC22A8	11q12.3	yes	no	no	5	466	3	yes	yes	Evidence at protein level
NX_Q8TDD1	ATP-dependent RNA helicase DDX54	DDX54	12q24.13	yes	no	no	2	886	19	no	yes	Evidence at protein level
NX_Q8TEA8	D-aminoacyl-tRNA deacylase 1	DTD1	20p11.23	yes	no	yes	1	118	5	no	yes	Evidence at protein level
NX_Q8WU39	Marginal zone B- and B1-cell-specific protein	MZB1	5q31.2	yes	no	no	5	293	3	yes	yes	Evidence at protein level
NX_Q8WU79	Stromal membrane-associated protein 2	SMAP2	1p34.2	yes	no	yes	3	293	17	no	yes	Evidence at protein level
NX_Q8WWY3	U4/U6 small nuclear ribonucleoprotein Prp31	PRPF31	19q13.42	yes	yes	yes	4	408	25	yes	yes	Evidence at protein level
NX_Q8WXF1	Paraspeckle component 1	PSPC1	13q12.11	yes	no	yes	2	434	12	yes	yes	Evidence at protein level
NX_Q8WXX5	DnaJ homolog subfamily C member 9	DNAJC9	10q22.2	yes	no	no	1	238	4	no	yes	Evidence at protein level
NX_Q8WZ60	Kelch-like protein 6	KLHL6	3q27.1	yes	no	no	1	564	3	no	yes	Evidence at protein level
NX_Q92499	ATP-dependent RNA helicase DDX1	DDX1	2p24.3	yes	no	yes	3	494	17	yes	yes	Evidence at protein level
NX_Q92506	Estradiol 17-beta-dehydrogenase 8	HSD17B8	6p21.32	yes	no	yes	1	227	4	yes	yes	Evidence at protein level
NX_Q92526	T-complex protein 1 subunit zeta-2	CCT6B	17q12	yes	no	no	3	451	1	no	yes	Evidence at protein level
NX_Q92616	eIF-2-alpha kinase activator GCN1	GCN1	12q24.23	yes	no	no	1	1782	28	no	yes	Evidence at protein level
NX_Q92619	Rho GTPase-activating protein 45	ARHGAP45	19p13.3	yes	no	yes	2	1101	45	no	yes	Evidence at protein level
NX_Q92665	28S ribosomal protein S31, mitochondrial	MRPS31	13q14.11	yes	no	yes	1	344	1	no	yes	Evidence at protein level
NX_Q92688	Acidic leucine-rich nuclear phosphoprotein 32 family member B	ANP32B	9q22.33	yes	no	yes	2	167	7	no	yes	Evidence at protein level
NX_Q92797	Symplekin	SYMPK	19q13.32	yes	no	yes	2	1002	40	yes	yes	Evidence at protein level
NX_Q92843	Bcl-2-like protein 2	BCL2L2	14q11.2	yes	no	yes	2	135	2	no	yes	Evidence at protein level
NX_Q92890	Ubiquitin recognition factor in ER-associated degradation protein 1	UFD1	22q11.21	yes	yes	yes	3	156	19	no	yes	Evidence at protein level
NX_Q92945	Far upstream element-binding protein 2	KHSRP	19p13.3	yes	no	yes	1	443	40	no	yes	Evidence at protein level
NX_Q92973	Transportin-1	TNPO1	5q13.2	yes	no	yes	3	429	6	yes	yes	Evidence at protein level
NX_Q93084	Sarcoplasmic/endoplasmic reticulum calcium ATPase 3	ATP2A3	17p13.2	yes	no	no	7	890	22	no	yes	Evidence at protein level
NX_Q96A72	Protein mago nashi homolog 2	MAGOHB	12p13.2	yes	no	yes	1	88	1	no	yes	Evidence at protein level
NX_Q96AE4	Far upstream element-binding protein 1	FUBP1	1p31.1	yes	no	yes	2	437	38	no	yes	Evidence at protein level
NX_Q96BP3	Peptidylprolyl isomerase domain and WD repeat-containing protein 1	PPWD1	5q12.3	yes	no	yes	2	471	4	no	yes	Evidence at protein level
NX_Q96BY6	Dedicator of cytokinesis protein 10	DOCK10	2q36.2	yes	no	no	3	1714	34	no	yes	Evidence at protein level
NX_Q96D96	Voltage-gated hydrogen channel 1	HVCN1	12q24.11	yes	no	yes	4	210	5	yes	yes	Evidence at protein level
NX_Q96DE0	U8 snoRNA-decapping enzyme	NUDT16	3q22.1	yes	no	yes	4	264	0	no	yes	Evidence at protein level
NX_Q96DI7	U5 small nuclear ribonucleoprotein 40 kDa protein	SNRNP40	1p35.2	yes	no	yes	2	221	6	no	yes	Evidence at protein level
NX_Q96DV4	39S ribosomal protein L38, mitochondrial	MRPL38	17q25.1	yes	no	yes	2	363	2	no	yes	Evidence at protein level
NX_Q96EP5	DAZ-associated protein 1	DAZAP1	19p13.3	yes	no	yes	2	265	13	no	yes	Evidence at protein level
NX_Q96F07	Cytoplasmic FMR1-interacting protein 2	CYFIP2	5q33.3	yes	yes	no	2	575	10	no	yes	Evidence at protein level
NX_Q96FI4	Endonuclease 8-like 1	NEIL1	15q24.2	yes	no	yes	1	404	1	yes	yes	Evidence at protein level
NX_Q96FJ0	AMSH-like protease	STAMBPL1	10q23.31	yes	no	yes	2	406	10	yes	yes	Evidence at protein level
NX_Q96FN9	D-aminoacyl-tRNA deacylase 2	DTD2	14q12	yes	no	no	1	131	0	no	yes	Evidence at protein level
NX_Q96GC5	39S ribosomal protein L48, mitochondrial	MRPL48	11q13.4	yes	no	yes	2	150	2	no	yes	Evidence at protein level
NX_Q96J01	THO complex subunit 3	THOC3	5q35.2	yes	no	no	2	263	8	no	yes	Evidence at protein level
NX_Q96KP4	Cytosolic non-specific dipeptidase	CNDP2	18q22.3	yes	no	yes	2	449	8	no	yes	Evidence at protein level
NX_Q96N67	Dedicator of cytokinesis protein 7	DOCK7	1p31.3	yes	yes	yes	7	1447	60	no	yes	Evidence at protein level
NX_Q96NC0	Zinc finger matrin-type protein 2	ZMAT2	5q31.3	yes	no	yes	1	82	15	no	yes	Evidence at protein level
NX_Q99504	Eyes absent homolog 3	EYA3	1p35.3	yes	no	no	5	320	18	yes	yes	Evidence at protein level
NX_Q99538	Legumain	LGMN	14q32.12	yes	no	yes	3	350	7	yes	yes	Evidence at protein level
NX_Q99729	Heterogeneous nuclear ribonucleoprotein A/B	HNRNPAB	5q35.3	yes	no	yes	4	246	36	no	yes	Evidence at protein level
NX_Q99873	Protein arginine N-methyltransferase 1	PRMT1	19q13.33	yes	no	yes	4	173	16	yes	yes	Evidence at protein level
NX_Q99986	Serine/threonine-protein kinase VRK1	VRK1	14q32.2	yes	yes	yes	1	263	20	yes	yes	Evidence at protein level
NX_Q9BPW8	Protein NipSnap homolog 1	NIPSNAP1	22q12.2	yes	no	no	1	172	19	no	yes	Evidence at protein level
NX_Q9BPX3	Condensin complex subunit 3	NCAPG	4p15.31	yes	no	yes	1	655	26	no	yes	Evidence at protein level
NX_Q9BPZ7	Target of rapamycin complex 2 subunit MAPKAP1	MAPKAP1	9q33.3	yes	no	yes	6	316	10	no	yes	Evidence at protein level
NX_Q9BQ67	Glutamate-rich WD repeat-containing protein 1	GRWD1	19q13.33	yes	no	no	1	466	15	no	yes	Evidence at protein level
NX_Q9BRX5	DNA replication complex GINS protein PSF3	GINS3	16q21	yes	no	yes	3	204	3	no	yes	Evidence at protein level
NX_Q9BSH5	Haloacid dehalogenase-like hydrolase domain-containing protein 3	HDHD3	9q32	yes	no	yes	1	220	3	no	yes	Evidence at protein level
NX_Q9BSJ8	Extended synaptotagmin-1	ESYT1	12q13.2	yes	no	no	2	881	39	yes	yes	Evidence at protein level
NX_Q9BTT0	Acidic leucine-rich nuclear phosphoprotein 32 family member E	ANP32E	1q21.2	yes	no	yes	3	126	14	yes	yes	Evidence at protein level
NX_Q9BV20	Methylthioribose-1-phosphate isomerase	MRI1	19p13.13	yes	no	yes	2	367	4	yes	yes	Evidence at protein level
NX_Q9BV86	N-terminal Xaa-Pro-Lys N-methyltransferase 1	NTMT1	9q34.11	yes	no	yes	2	213	6	yes	yes	Evidence at protein level
NX_Q9BVM4	Gamma-glutamylaminecyclotransferase	GGACT	13q32.3	yes	no	yes	1	151	0	yes	yes	Evidence at protein level
NX_Q9BW83	Intraflagellar transport protein 27 homolog	IFT27	22q12.3	yes	yes	no	2	148	2	yes	yes	Evidence at protein level
NX_Q9BY77	Polymerase delta-interacting protein 3	POLDIP3	22q13.2	yes	no	no	2	367	36	yes	yes	Evidence at protein level
NX_Q9BYD3	39S ribosomal protein L4, mitochondrial	MRPL4	19p13.2	yes	no	yes	2	316	4	no	yes	Evidence at protein level
NX_Q9BZQ8	Protein Niban 1	NIBAN1	1q25.3	yes	no	no	1	827	36	no	yes	Evidence at protein level
NX_Q9BZV1	UBX domain-containing protein 6	UBXN6	19p13.3	yes	no	no	2	482	11	no	yes	Evidence at protein level
NX_Q9C0B1	Alpha-ketoglutarate-dependent dioxygenase FTO	FTO	16q12.2	yes	yes	yes	4	436	17	yes	yes	Evidence at protein level
NX_Q9C0J8	pre-mRNA 3' end processing protein WDR33	WDR33	2q14.3	yes	no	yes	3	989	39	no	yes	Evidence at protein level
NX_Q9GZR7	ATP-dependent RNA helicase DDX24	DDX24	14q32.12	yes	no	no	2	713	25	no	yes	Evidence at protein level
NX_Q9GZU8	PSME3-interacting protein	FAM192A	16q13	yes	no	no	1	186	8	yes	yes	Evidence at protein level
NX_Q9GZZ1	N-alpha-acetyltransferase 50	NAA50	3q13.31	yes	no	yes	2	79	9	yes	yes	Evidence at protein level
NX_Q9H0A0	RNA cytidine acetyltransferase	NAT10	11p13	yes	no	no	2	823	16	yes	yes	Evidence at protein level
NX_Q9H0D6	5'-3' exoribonuclease 2	XRN2	20p11.22	yes	no	no	2	607	49	no	yes	Evidence at protein level
NX_Q9H0E2	Toll-interacting protein	TOLLIP	11p15.5	yes	no	yes	2	229	8	no	yes	Evidence at protein level
NX_Q9H223	EH domain-containing protein 4	EHD4	15q15.1	yes	no	no	1	464	10	no	yes	Evidence at protein level
NX_Q9H2H8	Peptidyl-prolyl cis-trans isomerase-like 3	PPIL3	2q33.1	yes	no	yes	2	150	3	no	yes	Evidence at protein level
NX_Q9H2M9	Rab3 GTPase-activating protein non-catalytic subunit	RAB3GAP2	1q41	yes	yes	no	2	1018	18	no	yes	Evidence at protein level
NX_Q9H3S4	Thiamin pyrophosphokinase 1	TPK1	7q35	yes	yes	yes	2	262	0	no	yes	Evidence at protein level
NX_Q9H492	Microtubule-associated proteins 1A/1B light chain 3A	MAP1LC3A	20q11.22	yes	no	yes	2	100	2	yes	yes	Evidence at protein level
NX_Q9H4A6	Golgi phosphoprotein 3	GOLPH3	5p13.3	yes	no	yes	1	204	5	yes	yes	Evidence at protein level
NX_Q9H6Z4	Ran-binding protein 3	RANBP3	19p13.3	yes	no	yes	3	405	48	no	yes	Evidence at protein level
NX_Q9H9B4	Sideroflexin-1	SFXN1	5q35.2	yes	no	no	1	272	4	no	yes	Evidence at protein level
NX_Q9HAV4	Exportin-5	XPO5	6p21.1	yes	no	yes	1	676	11	no	yes	Evidence at protein level
NX_Q9HAV7	GrpE protein homolog 1, mitochondrial	GRPEL1	4p16.1	yes	no	no	1	160	6	no	yes	Evidence at protein level
NX_Q9HBI0	Gamma-parvin	PARVG	22q13.31	yes	no	no	5	305	2	no	yes	Evidence at protein level
NX_Q9HCD5	Nuclear receptor coactivator 5	NCOA5	20q13.12	yes	no	yes	1	480	23	yes	yes	Evidence at protein level
NX_Q9NP77	RNA polymerase II subunit A C-terminal domain phosphatase SSU72	SSU72	1p36.33	yes	no	yes	2	154	6	yes	yes	Evidence at protein level
NX_Q9NP79	Vacuolar protein sorting-associated protein VTA1 homolog	VTA1	6q24.1	yes	no	yes	2	299	5	no	yes	Evidence at protein level
NX_Q9NP81	Serine--tRNA ligase, mitochondrial	SARS2	19q13.2	yes	yes	no	2	535	5	no	yes	Evidence at protein level
NX_Q9NR30	Nucleolar RNA helicase 2	DDX21	10q22.1	yes	no	yes	2	427	24	yes	yes	Evidence at protein level
NX_Q9NR31	GTP-binding protein SAR1a	SAR1A	10q22.1	yes	no	yes	2	101	4	no	yes	Evidence at protein level
NX_Q9NR45	Sialic acid synthase	NANS	9q22.33	yes	yes	yes	1	311	12	no	yes	Evidence at protein level
NX_Q9NRG0	Chromatin accessibility complex protein 1	CHRAC1	8q24.3	yes	no	no	1	109	4	no	yes	Evidence at protein level
NX_Q9NRY5	Protein FAM114A2	FAM114A2	5q33.2	yes	no	no	1	454	9	no	yes	Evidence at protein level
NX_Q9NTI5	Sister chromatid cohesion protein PDS5 homolog B	PDS5B	13q13.1	yes	no	yes	5	766	47	no	yes	Evidence at protein level
NX_Q9NTJ3	Structural maintenance of chromosomes protein 4	SMC4	3q25.33	yes	no	yes	2	1026	31	no	yes	Evidence at protein level
NX_Q9NTK5	Obg-like ATPase 1	OLA1	2q31.1	yes	no	yes	3	232	6	yes	yes	Evidence at protein level
NX_Q9NVA2	Septin-11	SEPTIN11	4q21.1	yes	yes	no	2	274	5	yes	yes	Evidence at protein level
NX_Q9NVI1	Fanconi anemia group I protein	FANCI	15q26.1	yes	yes	no	4	1208	37	yes	yes	Evidence at protein level
NX_Q9NVI7	ATPase family AAA domain-containing protein 3A	ATAD3A	1p36.33	yes	yes	no	3	646	5	yes	yes	Evidence at protein level
NX_Q9NVP2	Histone chaperone ASF1B	ASF1B	19p13.12	yes	no	yes	1	148	5	yes	yes	Evidence at protein level
NX_Q9NW64	Pre-mRNA-splicing factor RBM22	RBM22	5q33.1	yes	no	yes	2	182	16	yes	yes	Evidence at protein level
NX_Q9NX07	tRNA selenocysteine 1-associated protein 1	TRNAU1AP	1p35.3	yes	no	yes	2	189	4	no	yes	Evidence at protein level
NX_Q9NYL9	Tropomodulin-3	TMOD3	15q21.2	yes	no	no	1	275	13	no	yes	Evidence at protein level
NX_Q9NZI7	Upstream-binding protein 1	UBP1	3p22.3	yes	no	no	2	284	4	no	yes	Evidence at protein level
NX_Q9NZI8	Insulin-like growth factor 2 mRNA-binding protein 1	IGF2BP1	17q21.32	yes	no	yes	2	333	19	yes	yes	Evidence at protein level
NX_Q9P0J0	NADH dehydrogenase [ubiquinone] 1 alpha subcomplex subunit 13	NDUFA13	19p13.11	yes	yes	yes	2	175	5	yes	yes	Evidence at protein level
NX_Q9P0S3	ORM1-like protein 1	ORMDL1	2q32.2	yes	no	no	1	99	0	no	yes	Evidence at protein level
NX_Q9P258	Protein RCC2	RCC2	1p36.13	yes	no	yes	1	318	21	yes	yes	Evidence at protein level
NX_Q9P287	BRCA2 and CDKN1A-interacting protein	BCCIP	10q26.2	yes	no	no	4	327	12	no	yes	Evidence at protein level
NX_Q9UBB4	Ataxin-10	ATXN10	22q13.31	yes	yes	no	2	416	14	no	yes	Evidence at protein level
NX_Q9UBE0	SUMO-activating enzyme subunit 1	SAE1	19q13.32	yes	no	yes	3	325	11	yes	yes	Evidence at protein level
NX_Q9UBQ7	Glyoxylate reductase/hydroxypyruvate reductase	GRHPR	9p13.2	yes	yes	yes	2	421	6	no	yes	Evidence at protein level
NX_Q9UBY0	Sodium/hydrogen exchanger 2	SLC9A2	2q12.1	yes	no	no	1	644	7	no	yes	Evidence at protein level
NX_Q9UHD1	Cysteine and histidine-rich domain-containing protein 1	CHORDC1	11q14.3	yes	no	yes	2	203	11	no	yes	Evidence at protein level
NX_Q9UHX1	Poly(U)-binding-splicing factor PUF60	PUF60	8q24.3	yes	yes	yes	6	258	26	yes	yes	Evidence at protein level
NX_Q9UHY1	Nuclear receptor-binding protein	NRBP1	2p23.3	yes	no	no	1	242	21	no	yes	Evidence at protein level
NX_Q9UI08	Ena/VASP-like protein	EVL	14q32.2	yes	no	no	5	332	34	no	yes	Evidence at protein level
NX_Q9UII2	ATPase inhibitor, mitochondrial	ATP5IF1	1p35.3	yes	no	no	3	117	4	no	yes	Evidence at protein level
NX_Q9UJY4	ADP-ribosylation factor-binding protein GGA2	GGA2	16p12.2	yes	no	yes	1	542	11	yes	yes	Evidence at protein level
NX_Q9UJZ1	Stomatin-like protein 2, mitochondrial	STOML2	9p13.3	yes	no	no	2	231	16	no	yes	Evidence at protein level
NX_Q9UKM9	RNA-binding protein Raly	RALY	20q11.22	yes	no	yes	2	293	36	no	yes	Evidence at protein level
NX_Q9UKT9	Zinc finger protein Aiolos	IKZF3	17q12	yes	yes	no	16	341	12	no	yes	Evidence at protein level
NX_Q9UL25	Ras-related protein Rab-21	RAB21	12q21.1	yes	no	yes	1	153	8	yes	yes	Evidence at protein level
NX_Q9ULZ2	Signal-transducing adaptor protein 1	STAP1	4q13.2	yes	yes	yes	1	270	2	no	yes	Evidence at protein level
NX_Q9UMS4	Pre-mRNA-processing factor 19	PRPF19	11q12.2	yes	no	yes	1	247	8	yes	yes	Evidence at protein level
NX_Q9UNH7	Sorting nexin-6	SNX6	14q13.1	yes	no	no	2	250	13	yes	yes	Evidence at protein level
NX_Q9UNM6	26S proteasome non-ATPase regulatory subunit 13	PSMD13	11p15.5	yes	no	yes	2	264	13	no	yes	Evidence at protein level
NX_Q9UQ80	Proliferation-associated protein 2G4	PA2G4	12q13.2	yes	no	yes	2	115	21	yes	yes	Evidence at protein level
NX_Q9Y228	TRAF3-interacting JNK-activating modulator	TRAF3IP3	1q32.2	yes	no	no	3	454	3	no	yes	Evidence at protein level
NX_Q9Y230	RuvB-like 2	RUVBL2	19q13.33	yes	no	yes	2	264	28	yes	yes	Evidence at protein level
NX_Q9Y262	Eukaryotic translation initiation factor 3 subunit L	EIF3L	22q13.1	yes	no	yes	2	343	17	no	yes	Evidence at protein level
NX_Q9Y265	RuvB-like 1	RUVBL1	3q21.3	yes	no	yes	2	187	10	yes	yes	Evidence at protein level
NX_Q9Y281	Cofilin-2	CFL2	14q13.1	yes	yes	no	2	100	7	yes	yes	Evidence at protein level
NX_Q9Y2R0	Cytochrome c oxidase assembly factor 3 homolog, mitochondrial	COA3	17q21.2	yes	yes	no	1	115	2	no	yes	Evidence at protein level
NX_Q9Y314	Nitric oxide synthase-interacting protein	NOSIP	19q13.33	yes	no	no	1	242	22	no	yes	Evidence at protein level
NX_Q9Y316	Protein MEMO1	MEMO1	2p22.3	yes	no	yes	3	155	7	yes	yes	Evidence at protein level
NX_Q9Y376	Calcium-binding protein 39	CAB39	2q37.1	yes	no	yes	1	156	1	yes	yes	Evidence at protein level
NX_Q9Y3C6	Peptidyl-prolyl cis-trans isomerase-like 1	PPIL1	6p21.2	yes	no	yes	1	119	4	no	yes	Evidence at protein level
NX_Q9Y3D3	28S ribosomal protein S16, mitochondrial	MRPS16	10q22.2	yes	yes	yes	2	145	4	no	yes	Evidence at protein level
NX_Q9Y3F4	Serine-threonine kinase receptor-associated protein	STRAP	12p12.3	yes	no	no	2	214	13	no	yes	Evidence at protein level
NX_Q9Y3Z3	Deoxynucleoside triphosphate triphosphohydrolase SAMHD1	SAMHD1	20q11.23	yes	yes	yes	3	437	30	yes	yes	Evidence at protein level
NX_Q9Y5B9	FACT complex subunit SPT16	SUPT16H	14q11.2	yes	no	yes	1	357	40	no	yes	Evidence at protein level
NX_Q9Y5K5	Ubiquitin carboxyl-terminal hydrolase isozyme L5	UCHL5	1q31.2	yes	no	yes	4	191	13	yes	yes	Evidence at protein level
NX_Q9Y5M8	Signal recognition particle receptor subunit beta	SRPRB	3q22.1	yes	no	no	1	231	12	no	yes	Evidence at protein level
NX_Q9Y696	Chloride intracellular channel protein 4	CLIC4	1p36.11	yes	no	yes	1	177	18	no	yes	Evidence at protein level
NX_Q9Y6C9	Mitochondrial carrier homolog 2	MTCH2	11p11.2	yes	no	no	1	234	8	no	yes	Evidence at protein level

## Sheet: PE2
																																														Mean value (from 5 replicates)
acc. code	protein name	gene name(s)	chromosome	proteomics	GO MOLECULAR FUNCTION	GO BIOLOGICAL PROCESS	Keywords	disease	structure	#isof.	#variants	#PTMS	mutagenesis	tissue expr.	PE	Accession	Peptide count	Unique peptides	Confidence score	Anova (p)	Max fold change	Highest mean condition	Lowest mean condition	Description	N1	N2	N3	N4	N5	CB1	CB2	CB3	CB4	CB5	CC1	CC2	CC3	CC4	CC5	M1	M2	M3	M4	M5	Anova p-value <= 0,05	Naive	Centroblast	Centrocyte	Memory
NX_O14921	Regulator of G-protein signaling 13	RGS13	1q31.2	yes	NA	GO:0045744	Signal transduction inhibitor	no	no	1	152	0	no	yes	Evidence at transcript level	O14921-1	1	1	43.17	0.000442916	370.465	CENTROCYTE	MEMORY	Regulator of G-protein signaling 13 isoform Iso 1 GN=RGS13 OS=Homo Sapiens SV=282 PE=2	0	0	1064.61	0	0	13285.1	0	5889.37	36144.8	18243.7	12725.8	17699.7	34217.1	16816.6	10894.6	0	0	249.291	0	0	x	212.921	14712.6	18470.7	49.8583
																																														N	CB	CC	M
[truncated: 1 more columns]

## Sheet: PE5
																																															Mean value (from 5 replicates)
	acc. code	protein name	gene name(s)	chromosome	proteomics	GO MOLECULAR FUNCTION	GO BIOLOGICAL PROCESS	Keywords	disease	structure	#isof.	#variants	#PTMS	mutagenesis	tissue expr.	PE	Accession	Peptide count	Unique peptides	Confidence score	Anova (p)	Max fold change	Highest mean condition	Lowest mean condition	Description	N1	N2	N3	N4	N5	CB1	CB2	CB3	CB4	CB5	CC1	CC2	CC3	CC4	CC5	M1	M2	M3	M4	M5	Anova p-value <= 0,05	Naive	Centroblast	Centrocyte
A6NI72	NX_A6NI72	Putative neutrophil cytosol factor 1B	NCF1B	7q11.23	yes	GO:0035091; GO:0043325; GO:0016176; GO:0016175	GO:0055114; GO:0043085; GO:0045730; GO:0006801	Phosphatidylinositol binding	no	no	1	0	6	no	no	Uncertain	A6NI72-1	7	7	451.8	0.0176146	5.1157	CENTROCYTE	NAIVE	Putative neutrophil cytosol factor 1B isoform Iso 1 GN=NCF1B OS=Homo Sapiens SV=147 PE=5	78316	53944.6	964.558	7974.49	152280	335081	117083	114058	128878	117159	488781	371620	279886	200339	160725	104376	145221	165845	96224.1	28172	x	0	162452	300270
Q58FF7	NX_Q58FF7	Putative heat shock protein HSP 90-beta-3	HSP90AB3P	4q22.1	yes	GO:0005524; GO:0097718; GO:0051082	GO:0034605; GO:0006457; GO:0050821	Stress response	no	no	1	0	2	no	no	Uncertain	Q58FF7-1	21	21	1242.87	0.00583162	3.50277	CENTROBLAST	NAIVE	Putative heat shock protein HSP 90-beta-3 isoform Iso 1 GN=HSP90AB3P OS=Homo Sapiens SV=413 PE=5	392325	268264	114799	183625	721591	1.54336e+06	822159	251379	2.28416e+06	985717	932733	990651	905441	1.41795e+06	1.16331e+06	579112	516824	637822	536477	416708	x	336121	1.17736e+06	1.08202e+06
Q6DN03	NX_Q6DN03	Putative histone H2B type 2-C	HIST2H2BC	1q21.2	yes	GO:0003677; GO:0046982	GO:0006334	DNA-binding	no	no	1	0	47	no	no	Uncertain	Q6DN03-1	1	1	39.08	0.0142475	55.4385	CENTROBLAST	NAIVE	Putative histone H2B type 2-C isoform Iso 1 GN=HIST2H2BC OS=Homo Sapiens SV=154 PE=5	0	473.248	0	300.818	2005.97	19496.5	5059.59	110562	15201.9	3801.13	8806.08	11590.3	679.311	24263.5	14598	626.841	1820.6	2571.63	0	1467.29	x	556.008	30824.3	11987.5
Q8IUI4	NX_Q8IUI4	Putative protein SNX29P2	SNX29P2	16p11.2	yes	NA	NA	Could be relation with Phosphatidylinositol binding GO:0035091	no	no	1	11	0	no	no	Uncertain	Q8IUI4-1	2	2	86.37	0.0121077	11.3272	CENTROCYTE	NAIVE	Putative protein SNX29P2 isoform Iso 1 GN=SNX29P2 OS=Homo Sapiens SV=177 PE=5	506.383	21.3303	37494.4	0	3565.59	15231.1	10432.9	12832.9	34748.3	25310	72678.8	36033.9	51328.7	20262.9	39402.4	6535.09	2898.42	781.558	7621.7	1559.54	x	0	19711	43941.3
Q8NHW5	NX_Q8NHW5	60S acidic ribosomal protein P0-like	RPLP0P6	2p22.1	yes	GO:0070180; GO:0003735	GO:0002181; GO:0000027	Ribosomal protein	no	no	1	0	6	no	no	Uncertain	Q8NHW5-1	7	7	485.93	0.00313804	5.16841	CENTROBLAST	NAIVE	60S acidic ribosomal protein P0-like isoform Iso 1 GN=RPLP0P6 OS=Homo Sapiens SV=267 PE=5	75589.1	73551.4	7489.75	51296.2	449922	874674	172780	768432	858530	725614	572649	503826	293689	948919	414743	282282	442366	372064	175034	166387	x	131570	680006	546765
Q9BYX7	NX_Q9BYX7	Putative beta-actin-like protein 3	POTEKP	2q21.1	yes	GO:0098973; GO:0098973	GO:0098974; GO:0048488	ATP-binding and structural constituent of postsynaptic actin cytoskeleton	no	no	1	0	3	no	yes	Uncertain	Q9BYX7-1	3	3	281.96	0.0040658	3.20914	MEMORY	NAIVE	Putative beta-actin-like protein 3 isoform Iso 1 GN=POTEKP OS=Homo Sapiens SV=446 PE=5	1.36627e+06	1.51726e+06	280882	857837	8.93909e+06	6.23847e+06	6.06866e+06	1.06067e+07	5.78645e+06	4.41553e+06	5.44138e+06	5.10062e+06	3.16662e+06	8.58057e+06	6.56039e+06	8.72878e+06	8.38869e+06	1.04621e+07	9.86631e+06	4.14882e+06	x	0	6.62316e+06	5.76992e+06
																																															N	CB	CC
[truncated: 2 more columns]
